# Supplementary material for: Are the ecological effects of the “worst” marine invasive species linked with scientific and media attention?
Source: PLoS One. 2019 Apr 18;14(4):e0215691. doi: 10.1371/journal.pone.0215691 (PMC6472817; doi:10.1371/journal.pone.0215691)
Supplement: S3 Table — (CSV) [file pone.0215691.s003.csv]

Authors	Title	Source name	Volume	First page	DOI	Year	SN
Liang, Xia; He, Chiquan; Zhu, Xi'e; Chen, Xueping; Lei, Yanru; Zhang, Hui; Qin, Zhe; Qi, Xitong	Effect of exotic Spartina alterniflora on fungal symbiosis with native plants Phragmites australis and Scirpus mariqueter, and model plants Lolium perenne L. and Trifolium repens	AQUATIC BOTANY	130	50	10.1016/j.aquabot.2015.10.003	2016	0304-3770
Koop, Jennifer A. H.; Kim, Peter S.; Knutie, Sarah A.; Adler, Fred; Clayton, Dale H.	An introduced parasitic fly may lead to local extinction of Darwin's finch populations	JOURNAL OF APPLIED ECOLOGY	53	511	10.1111/1365-2664.12575	2016	0021-8901
Thomas, Jacob; El-Sheikh, Mohammed A.; Alfarhan, Ahmed H.; Alatar, Abdulrehman A.; Sivadasan, M.; Basahi, Mohammed; Al-Obaid, Sami; Rajakrishnan, R.	Impact of alien invasive species on habitats and species richness in Saudi Arabia	JOURNAL OF ARID ENVIRONMENTS	127	53	10.1016/j.jaridenv.2015.10.009	2016	0140-1963
Bulleri, Fabio; Badalamenti, Fabio; Ivesa, Ljiljana; Mikac, Barbara; Musco, Luigi; Jaklin, Andrej; Rattray, Alex; Fernandez, Tomas Vega; Benedetti-Cecchi, Lisandro	The effects of an invasive seaweed on native communities vary along a gradient of land-based human impacts	PEERJ	4		10.7717/peerj.1795	2016	2167-8359
Gerard, Agathe; Jourdan, Herve; Millon, Alexandre; Vidal, Eric	Knocking on Heaven's Door: Are Novel Invaders Necessarily Facing Naive Native Species on Islands?	PLOS ONE	11		10.1371/journal.pone.0151545	2016	1932-6203
Miranda, Ricardo J.; Cruz, Igor C. S.; Barros, Francisco	Effects of the alien coral Tubastraea tagusensis on native coral assemblages in a southwestern Atlantic coral reef	MARINE BIOLOGY	163		10.1007/s00227-016-2819-9	2016	0025-3162
Lange, Rolanda; Marshall, Dustin J.	Propagule size and dispersal costs mediate establishment success of an invasive species	ECOLOGY	97	569	10.1890/15-1573	2016	0012-9658
Yuan, W. Samantha; Hoffman, Eric A.; Walters, Linda J.	Effects of nonnative invertebrates on two life stages of the native eastern oyster Crassostrea virginica	BIOLOGICAL INVASIONS	18	689	10.1007/s10530-015-1040-y	2016	1387-3547
Romeiras, Maria M.; Catarino, Silvia; Gomes, Isildo; Fernandes, Claudia; Costa, Jose C.; Caujape-Castells, Juli; Duarte, Maria Cristina	IUCN Red List assessment of the Cape Verde endemic flora: towards a global strategy for plant conservation in Macaronesia	BOTANICAL JOURNAL OF THE LINNEAN SOCIETY	180	413	10.1111/boj.12370	2016	0024-4074
Carbonell, J. A.; Millan, A.; Green, A. J.; Cespedes, V.; Coccia, C.; Velasco, J.	What traits underpin the successful establishment and spread of the invasive water bug Trichocorixa verticalis verticalis?	HYDROBIOLOGIA	768	273	10.1007/s10750-015-2556-y	2016	0018-8158
Banaduc, Doru; Rey, Sonia; Trichkova, Teodora; Lenhardt, Mirjana; Curtean-Banaduc, Angela	The Lower Danube River-Danube Delta-North West Black Sea: A pivotal area of major interest for the past, present and future of its fish fauna - A short review	SCIENCE OF THE TOTAL ENVIRONMENT	545	137	10.1016/j.scitotenv.2015.12.058	2016	0048-9697
Hata, Kenji; Kawakami, Kazuto; Kachi, Naoki	Increases in soil water content after the mortality of non-native trees in oceanic island forest ecosystems are due to reduced water loss during dry periods	SCIENCE OF THE TOTAL ENVIRONMENT	545	372	10.1016/j.scitotenv.2015.12.007	2016	0048-9697
Anton, Andrea; Cure, Katherine; Layman, Craig A.; Puntila, Riikka; Simpson, Michael S.; Bruno, John F.	Prey naivete to invasive lionfish Pterois volitans on Caribbean coral reefs	MARINE ECOLOGY PROGRESS SERIES	544	257	10.3354/meps11553	2016	0171-8630
James, Kate; Shears, Nick T.	Proliferation of the invasive kelp Undaria pinnatifida at aquaculture sites promotes spread to coastal reefs	MARINE BIOLOGY	163		10.1007/s00227-015-2811-9	2016	0025-3162
Nishikawa, Yoko; Shimamura, Takashi	Effects of alien invasion by Bombus terrestris L. (Apidae) on the visitation patterns of native bumblebees in coastal plants in northern Japan	JOURNAL OF INSECT CONSERVATION	20	71	10.1007/s10841-015-9841-y	2016	1366-638X
da Silva, Carmen R. B.; Groom, Scott V. C.; Stevens, Mark I.; Schwarz, Michael P.	Current status of the introduced allodapine bee Braunsapis puangensis (Hymenoptera: Apidae) in Fiji	AUSTRAL ENTOMOLOGY	55	43	10.1111/aen.12149	2016	2052-1758
Yuan, Junji; Ding, Weixin; Liu, Deyan; Kang, Hojeong; Xiang, Jian; Lin, Yongxin	Shifts in methanogen community structure and function across a coastal marsh transect: effects of exotic Spartina alterniflora invasion	SCIENTIFIC REPORTS	6		10.1038/srep18777	2016	2045-2322
Castorani, Max C. N.; Hovel, Kevin A.	Native predator chemical cues induce anti-predation behaviors in an invasive marine bivalve	BIOLOGICAL INVASIONS	18	169	10.1007/s10530-015-1000-6	2016	1387-3547
Neumann, Gabor; O'Dowd, Dennis J.; Gullan, Penny J.; Green, Peter T.	Diversity, endemism and origins of scale insects on a tropical oceanic island: Implications for management of an invasive ant	Journal of Asia-Pacific Entomology	19	159		2016	1226-8615
Herzog, Cecilia Polacow	A multifunctional green infrastructure design to protect and improve native biodiversity in Rio de Janeiro	LANDSCAPE AND ECOLOGICAL ENGINEERING	12	141	10.1007/s11355-013-0233-8	2016	1860-1871
Harper, Grant A.; Rutherford, Malcolm	Home range and population density of black rats (Rattus rattus) on a seabird island: a case for a marine subsidised effect?	NEW ZEALAND JOURNAL OF ECOLOGY	40	219		2016	0110-6465
Towns, David R.; Borrelle, Stephanie B.; Thoresen, Joshua; Buxton, Rachel T.; Evans, Annette	Mercury Islands and their role in understanding seabird island restoration	NEW ZEALAND JOURNAL OF ECOLOGY	40	235		2016	0110-6465
Wang, Haitao; Liao, Guanshun; D'Souza, Melissa; Yu, Xiaoqing; Yang, Jun; Yang, Xiaoru; Zheng, Tianling	Temporal and spatial variations of greenhouse gas fluxes from a tidal mangrove wetland in Southeast China	ENVIRONMENTAL SCIENCE AND POLLUTION RESEARCH	23	1873	10.1007/s11356-015-5440-4	2016	0944-1344
Dickens, Sara Jo M.; Mangla, Seema; Preston, Kristine L.; Suding, Katherine N.	Embracing variability: environmental dependence and plant community context in ecological restoration	RESTORATION ECOLOGY	24	119	10.1111/rec.12288	2016	1061-2971
Gucu, Ali Cemal; Inanmaz, Ozgur Emek; Ok, Meltem; Sakinan, Serdar	Recent changes in the spawning grounds of Black Sea anchovy, Engraulis encrasicolus	FISHERIES OCEANOGRAPHY	25	67	10.1111/fog.12135	2016	1054-6006
South, Paul M.; Lilley, Stacie A.; Tait, Leigh W.; Alestra, Tommaso; Hickford, Michael J. H.; Thomsen, Mads S.; Schiel, David R.	Transient effects of an invasive kelp on the community structure and primary productivity of an intertidal assemblage	MARINE AND FRESHWATER RESEARCH	67	103	10.1071/MF14211	2016	1323-1650
Warzocha, Jan; Szymanek, Lena; Witalis, Bartosz; Wodzinowski, Tycjan	The first report on the establishment and spread of the alien clam Rangia cuneata (Mactridae) in the Polish part of the Vistula Lagoon (southern Baltic)	OCEANOLOGIA	58	54	10.1016/j.oceano.2015.10.001	2016	0078-3234
Grugni, Viola; Battaglia, Vincenza; Perego, Ugo Alessandro; Raveane, Alessandro; Lancioni, Hovirag; Olivieri, Anna; Ferretti, Luca; Woodward, Scott R.; Miguel Pascale, Juan; Cooke, Richard; Myres, Natalie; Motta, Jorge; Torroni, Antonio; Achilli, Alessandro; Semino, Ornella	Exploring the Y Chromosomal Ancestry of Modern Panamanians	PLOS ONE	10		10.1371/journal.pone.0144223	2015	1932-6203
Kark, Salit; Brokovich, Eran; Mazor, Tessa; Levin, Noam	Emerging conservation challenges and prospects in an era of offshore hydrocarbon exploration and exploitation	CONSERVATION BIOLOGY	29	1573	10.1111/cobi.12562	2015	0888-8892
Pante, Eric; Pascal, Pierre-Yves; Becquet, Vanessa; Viricel, Amelia; Simon-Bouhet, Benoit; Garcia, Pascale	Evaluating the genetic effects of the invasive Ocenebra inornata on the native oyster drill Ocenebra erinacea	MARINE ECOLOGY-AN EVOLUTIONARY PERSPECTIVE	36	1118	10.1111/maec.12208	2015	0173-9565
Dorta Almenar, I.; Navarro Rivero, F. J.; Arbelo, C. D.; Rodriguez, A.; Notario del Pino, J.	The temporal distribution of water-soluble nutrients from high mountain soils following a wildfire within legume scrubland of Tenerife, Canary Islands, Spain	CATENA	135	393	10.1016/j.catena.2014.09.016	2015	0341-8162
Sureda, Antoni; Box, Antonio; Tejada, Silvia	Assessment and physiological state of the Posidonia oceanica meadows in Porto Cristo (Manacor, Spain)	CONTINENTAL SHELF RESEARCH	111	327	10.1016/j.csr.2015.08.025	2015	0278-4343
Zhan, Aibin; Briski, Elizabeta; Bock, Dan G.; Ghabooli, Sara; MacIsaac, Hugh J.	Ascidians as models for studying invasion success	MARINE BIOLOGY	162	2449	10.1007/s00227-015-2734-5	2015	0025-3162
Johnston, Matthew W.; Purkis, Sam J.; Dodge, Richard E.	Measuring Bahamian lionfish impacts to marine ecological services using habitat equivalency analysis	MARINE BIOLOGY	162	2501	10.1007/s00227-015-2745-2	2015	0025-3162
Jimenez, Rocio Suarez; Hepburn, Christopher D.; Hyndes, Glenn A.; McLeod, Rebecca J.; Taylor, Richard B.; Hurd, Catriona L.	Do native subtidal grazers eat the invasive kelp Undaria pinnatifida?	MARINE BIOLOGY	162	2521	10.1007/s00227-015-2757-y	2015	0025-3162
Long, Holly A.; Grosholz, Edwin D.	Overgrowth of eelgrass by the invasive colonial tunicate Didemnum vexillum: Consequences for tunicate and eelgrass growth and epifauna abundance	JOURNAL OF EXPERIMENTAL MARINE BIOLOGY AND ECOLOGY	473	188	10.1016/j.jembe.2015.08.014	2015	0022-0981
Mendez, Maria M.; Schwindt, Evangelina; Bortolus, Alejandro	Differential benthic community response to increased habitat complexity mediated by an invasive barnacle	AQUATIC ECOLOGY	49	441	10.1007/s10452-015-9536-1	2015	1386-2588
Martin-Albarracin, Valeria L.; Amico, Guillermo C.; Simberloff, Daniel; Nunez, Martin A.	Impact of Non-Native Birds on Native Ecosystems: A Global Analysis	PLOS ONE	10		10.1371/journal.pone.0143070	2015	1932-6203
Marchante, Helia; Marchante, Elizabete; Freitas, Helena; Hoffmann, John H.	Temporal changes in the impacts on plant communities of an invasive alien tree, Acacia longifolia	PLANT ECOLOGY	216	1481	10.1007/s11258-015-0530-4	2015	1385-0237
Catry, F. X.; Moreira, F.; Deus, E.; Silva, J. S.; Aguas, A.	Assessing the extent and the environmental drivers of Eucalyptus globulus wildling establishment in Portugal: results from a countrywide survey	BIOLOGICAL INVASIONS	17	3163	10.1007/s10530-015-0943-y	2015	1387-3547
Elleriis, Pernille; Pedersen, Morten Lauge; Toft, Soren	Impact of invasive Rosa rugosa on the arthropod fauna of Danish yellow dunes	BIOLOGICAL INVASIONS	17	3289	10.1007/s10530-015-0953-9	2015	1387-3547
Taylor, David I.; Wood, Susanna A.; McNabb, Paul; Ogilvie, Shaun; Cornelisen, Chris; Walker, Jarrod; Khor, Serena; Cary, Stephen Craig	Facilitation effects of invasive and farmed bivalves on native populations of the sea slug Pleurobranchaea maculata	MARINE ECOLOGY PROGRESS SERIES	537	39	10.3354/meps11466	2015	0171-8630
Hendrickx, Jason P.; Creese, Robert G.; Gribben, Paul E.	Impacts of a non-native gastropod with a limited distribution; less conspicuous invaders matter too	MARINE ECOLOGY PROGRESS SERIES	537	151	10.3354/meps11469	2015	0171-8630
Pinna, Maria Silvia; Canadas, Eva Maria; Fenu, Giuseppe; Bacchetta, Gianluigi	The European Juniperus habitat in the Sardinian coastal dunes: Implication for conservation	ESTUARINE COASTAL AND SHELF SCIENCE	164	214	10.1016/j.ecss.2015.07.032	2015	0272-7714
Valderrama, Diego; Fields, Kathrynann H.	Linking removal targets to the ecological effects of invaders: a predictive model and field test	ECOLOGICAL APPLICATIONS	25	2047	10.1890/14-2485.1	2015	1051-0761
Needles, Lisa A.; Gosnell, J. Stephen; Waltz, Grant T.; Wendt, Dean E.; Gaines, Steven D.	Trophic cascades in an invaded ecosystem: native keystone predators facilitate a dominant invader in an estuarine community	OIKOS	124	1282	10.1111/oik.01865	2015	0030-1299
Vanhaecke, Delphine; de Leaniz, Carlos Garcia; Gajardo, Gonzalo; Dunham, Jason; Giannico, Guillermo; Consuegra, Sofia	Genetic signatures of historical dispersal of fish threatened by biological invasions: the case of galaxiids in South America	JOURNAL OF BIOGEOGRAPHY	42	1942	10.1111/jbi.12568	2015	0305-0270
Kaiser-Bunbury, Christopher N.; Mougal, James; Valentin, Terence; Gabriel, Ronny; Bluethgen, Nico	Herbicide application as a habitat restoration tool: impact on native island plant communities	APPLIED VEGETATION SCIENCE	18	650	10.1111/avsc.12183	2015	1402-2001
Hiradate, Syuntaro; Morita, Sayaka; Hata, Kenji; Osawa, Takeshi; Sugai, Kyoko; Kachi, Naoki	Effects of soil erosion and seabird activities on chemical properties of surface soils on an oceanic island in Ogasawara Islands, Japan	CATENA	133	495	10.1016/j.catena.2015.04.013	2015	0341-8162
Ros, Macarena; Vazquez-Luis, Maite; Guerra-Garcia, Jose M.	Environmental factors modulating the extent of impact in coastal invasions: The case of a widespread invasive caprellid (Crustacea: Amphipoda) in the Iberian Peninsula	MARINE POLLUTION BULLETIN	98	247	10.1016/j.marpolbul.2015.06.041	2015	0025-326X
DeAmicis, Stacey; Foggo, Andrew	Long-Term Field Study Reveals Subtle Effects of the Invasive Alga Sargassum muticum upon the Epibiota of Zostera marina	PLOS ONE	10		10.1371/journal.pone.0137861	2015	1932-6203
Morand, Serge; Bordes, Frederic; Chen, Hsuan-Wien; Claude, Julien; Cosson, Jean-Francois; Galan, Maxime; Czirjak, Gabor A.; Greenwood, Alex D.; Latinne, Alice; Michaux, Johan; Ribas, Alexis	Global parasite and Rattus rodent invasions: The consequences for rodent-borne diseases	INTEGRATIVE ZOOLOGY	10	409	10.1111/1749-4877.12143	2015	1749-4877
Gambill, Maria; Moller, Lene Friis; Peck, Myron A.	Effects of temperature on the feeding and growth of the larvae of the invasive ctenophore Mnemiopsis leidyi	JOURNAL OF PLANKTON RESEARCH	37	1001	10.1093/plankt/fbv039	2015	0142-7873
Gribben, Paul E.; Simpson, Michael; Wright, Jeffrey T.	Relationships between an invasive crab, habitat availability and intertidal community structure at biogeographic scales	MARINE ENVIRONMENTAL RESEARCH	110	124	10.1016/j.marenvres.2015.08.006	2015	0141-1136
Lazzaro, Lorenzo; Giuliani, Claudia; Benesperi, Renato; Calamassi, Roberto; Foggi, Bruno	Plant species loss and community nestedness after leguminous tree Acacia pycnantha invasion in a Mediterranean ecosystem	FOLIA GEOBOTANICA	50	229	10.1007/s12224-015-9222-z	2015	1211-9520
Tamburello, Laura; Maggi, Elena; Benedetti-Cecchi, Lisandro; Bellistri, Giuseppe; Rattray, Alex James; Ravaglioli, Chiara; Rindi, Luca; Roberts, Jason; Bulleri, Fabio	Variation in the impact of non-native seaweeds along gradients of habitat degradation: a meta-analysis and an experimental test	OIKOS	124	1121	10.1111/oik.02197	2015	0030-1299
Christiansen, Jorgen S.; Sparboe, Maria; Saether, Bjorn-S.; Siikavuopio, Sten I.	Thermal behaviour and the prospect spread of an invasive benthic top predator onto the Euro-Arctic shelves	DIVERSITY AND DISTRIBUTIONS	21	1004	10.1111/ddi.12321	2015	1366-9516
O'Farrell, Shay; Salguero-Gomez, Roberto; van Rooij, Jules M.; Mumby, Peter J.	Disentangling trait-based mortality in species with decoupled size and age	JOURNAL OF ANIMAL ECOLOGY	84	1446	10.1111/1365-2656.12399	2015	0021-8790
Griffen, Blaine D.; Riley, Megan E.	Potential impacts of invasive crabs on one life history strategy of native rock crabs in the Gulf of Maine	BIOLOGICAL INVASIONS	17	2533	10.1007/s10530-015-0890-7	2015	1387-3547
O'Loughlin, Luke S.; Green, Peter T.	Invader-invader mutualism influences land snail community composition and alters invasion success of alien species in tropical rainforest	BIOLOGICAL INVASIONS	17	2659	10.1007/s10530-015-0903-6	2015	1387-3547
Garside, C. J.; Coleman, M. A.; Kelaher, B. P.; Bishop, M. J.	Putative Predators of Carcinus Maenas in Eastern Australia	ESTUARIES AND COASTS	38	1557	10.1007/s12237-014-9895-1	2015	1559-2723
Bray, D. J.; Green, I.; Golicher, D.; Herbert, R. J. H.	Spatial variation of trace metals within intertidal beds of native mussels (Mytilus edulis) and non-native Pacific oysters (Crassostrea gigas): implications for the food web?	HYDROBIOLOGIA	757	235	10.1007/s10750-015-2255-8	2015	0018-8158
Alexander, Mhairi E.; Raven, Hannah J.; Robinson, Tamara B.	Foraging decisions of a native whelk, Trochia cingulata Linnaeus, and the effects of invasive mussels on prey choice	JOURNAL OF EXPERIMENTAL MARINE BIOLOGY AND ECOLOGY	470	26	10.1016/j.jembe.2015.04.023	2015	0022-0981
Sepulveda, Maritza; Newsome, Seth D.; Pavez, Guido; Oliva, Doris; Costa, Daniel P.; Hueckstaedt, Luis A.	Using Satellite Tracking and Isotopic Information to Characterize the Impact of South American Sea Lions on Salmonid Aquaculture in Southern Chile	PLOS ONE	10		10.1371/journal.pone.0134926	2015	1932-6203
Staubus, Weston J.; Boyd, Elise S.; Adams, Tessa A.; Spear, Dakota M.; Dipman, Madison M.; Meyer, Wallace M., III	Ant communities in native sage scrub, non-native grassland, and suburban habitats in Los Angeles County, USA: conservation implications	JOURNAL OF INSECT CONSERVATION	19	669	10.1007/s10841-015-9790-5	2015	1366-638X
Vye, Siobhan R.; Emmerson, Mark C.; Arenas, Francisco; Dick, Jaimie T. A.; O'Connor, Nessa E.	Stressor intensity determines antagonistic interactions between species invasion and multiple stressor effects on ecosystem functioning	OIKOS	124	1005	10.1111/oik.01583	2015	0030-1299
Fraser, Elaine J.; Lambin, Xavier; Travis, Justin M. J.; Harrington, Lauren A.; Palmer, Stephen C. F.; Bocedi, Greta; Macdonald, David W.	Range expansion of an invasive species through a heterogeneous landscape - the case of American mink in Scotland	DIVERSITY AND DISTRIBUTIONS	21	888	10.1111/ddi.12303	2015	1366-9516
Byers, James E.; Smith, Rachel S.; Pringle, James M.; Clark, Graeme F.; Gribben, Paul E.; Hewitt, Chad L.; Inglis, Graeme J.; Johnston, Emma L.; Ruiz, Gregory M.; Stachowicz, John J.; Bishop, Melanie J.	Invasion Expansion: Time since introduction best predicts global ranges of marine invaders	SCIENTIFIC REPORTS	5		10.1038/srep12436	2015	2045-2322
Henderson, Jeremy; Hacker, Sally D.	Buried alive: an invasive seagrass (Zostera japonica) changes its reproductive allocation in response to sediment disturbance	MARINE ECOLOGY PROGRESS SERIES	532	123	10.3354/meps11335	2015	0171-8630
Ingeman, Kurt E.; Webster, Michael S.	Native prey mortality increases but remains density-dependent following lionfish invasion	MARINE ECOLOGY PROGRESS SERIES	531	241	10.3354/meps11332	2015	0171-8630
Michaud, Jene; Cordell, Susan; Cole, T. Colleen; Ostertag, Rebecca	Drought in an Invaded Hawaiian Lowland Wet Forest	PACIFIC SCIENCE	69	367	10.2984/69.3.6	2015	0030-8870
Castorani, Max C. N.; Hovel, Kevin A.	Invasive prey indirectly increase predation on their native competitors	ECOLOGY	96	1911	10.1890/14-1538.1	2015	0012-9658
Waser, Andreas M.; Splinter, Wouter; van der Meer, Jaap	Indirect effects of invasive species affecting the population structure of an ecosystem engineer	ECOSPHERE	6		10.1890/ES14-00437.1	2015	2150-8925
Dalecky, Ambroise; Ba, Khalilou; Piry, Sylvain; Lippens, Cedric; Diagne, Christophe A.; Kane, Mamadou; Sow, Aliou; Diallo, Mamoudou; Niang, Youssoupha; Konecny, Adam; Sarr, Nathalie; Artige, Emmanuelle; Charbonnel, Nathalie; Granjon, Laurent; Duplantier, Jean-Marc; Brouat, Carine	Range expansion of the invasive house mouse Mus musculus domesticus in Senegal, West Africa: a synthesis of trapping data over three decades, 1983-2014	MAMMAL REVIEW	45	176	10.1111/mam.12043	2015	0305-1838
Airoldi, Laura; Turon, Xavier; Perkol-Finkel, Shimrit; Rius, Marc	Corridors for aliens but not for natives: effects of marine urban sprawl at a regional scale	DIVERSITY AND DISTRIBUTIONS	21	755	10.1111/ddi.12301	2015	1366-9516
Pan, Xubin; Zhang, Jingqiu; Xu, Han; Zhang, Xianglin; Zhang, Wei; Song, Huahai; Zhu, Shuifang	Spatial similarity in the distribution of invasive alien plants and animals in China	NATURAL HAZARDS	77	1751	10.1007/s11069-015-1672-3	2015	0921-030X
Pettay, D. Tye; Wham, Drew C.; Smith, Robin T.; Iglesias-Prieto, Roberto; LaJeunesse, Todd C.	Microbial invasion of the Caribbean by an Indo-Pacific coral zooxanthella	PROCEEDINGS OF THE NATIONAL ACADEMY OF SCIENCES OF THE UNITED STATES OF AMERICA	112	7513	10.1073/pnas.1502283112	2015	0027-8424
Abd El-Gawad A, M.; El-Amier, Y. A.	Allelopathy and Potential Impact of Invasive Acacia saligna (Labill.) Wendl. on Plant Diversity in the Nile Delta Coast of Egypt	INTERNATIONAL JOURNAL OF ENVIRONMENTAL RESEARCH	9	923		2015	1735-6865
Goedknegt, M. Anouk; Welsh, Jennifer E.; Drent, Jan; Thieltges, David W.	Climate change and parasite transmission: how temperature affects parasite infectivity via predation on infective stages	ECOSPHERE	6		10.1890/ES15-00016.1	2015	2150-8925
Blakeslee, April M. H.; Keogh, Carolyn L.; Fowler, Amy E.; Griffen, Blaine D.	Assessing the Effects of Trematode Infection on Invasive Green Crabs in Eastern North America	PLOS ONE	10		10.1371/journal.pone.0128674	2015	1932-6203
Dvoretsky, Alexander G.; Dvoretsky, Vladimir G.	Commercial fish and shellfish in the Barents Sea: Have introduced crab species affected the population trajectories of commercial fish?	REVIEWS IN FISH BIOLOGY AND FISHERIES	25	297	10.1007/s11160-015-9382-1	2015	0960-3166
Sadchatheeswaran, Saachi; Branch, George M.; Robinson, Tamara B.	Changes in habitat complexity resulting from sequential invasions of a rocky shore: implications for community structure	BIOLOGICAL INVASIONS	17	1799	10.1007/s10530-014-0837-4	2015	1387-3547
Guadalupe Vazquez, M.; Bas, Claudia C.; Kittlein, Marcelo; Spivak, Eduardo D.	Effects of temperature and salinity on larval survival and development in the invasive shrimp Palaemon macrodactylus (Caridea: Palaemonidae) along the reproductive season	JOURNAL OF SEA RESEARCH	99	56	10.1016/j.seares.2015.02.002	2015	1385-1101
McGeoch, Melodie A.; Shaw, Justine D.; Terauds, Aleks; Lee, Jennifer E.; Chown, Steven L.	Monitoring biological invasion across the broader Antarctic: A baseline and indicator framework	GLOBAL ENVIRONMENTAL CHANGE-HUMAN AND POLICY DIMENSIONS	32	108	10.1016/j.gloenvcha.2014.12.012	2015	0959-3780
Forsyth, David M.; Wilson, Deborah J.; Easdale, Tomas A.; Kunstler, Georges; Canham, Charles D.; Ruscoe, Wendy A.; Wright, Elaine F.; Murphy, Lora; Gormley, Andrew M.; Gaxiola, Aurora; Coomes, David A.	Century-scale effects of invasive deer and rodents on the dynamics of forests growing on soils of contrasting fertility	ECOLOGICAL MONOGRAPHS	85	157	10.1890/14-0389.1	2015	0012-9615
Benkwitt, Cassandra E.	Non-linear effects of invasive lionfish density on native coral-reef fish communities	BIOLOGICAL INVASIONS	17	1383	10.1007/s10530-014-0801-3	2015	1387-3547
Zaiko, Anastasija; Daunys, Darius	Invasive ecosystem engineers and biotic indices: Giving a wrong impression of water quality improvement?	ECOLOGICAL INDICATORS	52	292	10.1016/j.ecolind.2014.12.023	2015	1470-160X
Ojaveer, Henn; Kotta, Jonne	Ecosystem impacts of the widespread non-indigenous species in the Baltic Sea: literature survey evidences major limitations in knowledge	HYDROBIOLOGIA	750	171	10.1007/s10750-014-2080-5	2015	0018-8158
Jaeger, Heinke	Biology and Impacts of Pacific Island Invasive Species. 11. Cinchona pubescens (Red Quinine Tree) (Rubiaceae)	PACIFIC SCIENCE	69	133	10.2984/69.2.1	2015	0030-8870
Mineur, Frederic; Arenas, Francisco; Assis, Jorge; Davies, Andrew J.; Engelen, Aschwin H.; Fernandes, Francisco; Malta, Erik-Jan; Thibaut, Thierry; Van Nguyen, Tu; Vaz-Pinto, Fatima; Vranken, Sofie; Serrao, Ester A.; De Clerck, Olivier	European seaweeds under pressure: Consequences for communities and ecosystem functioning	JOURNAL OF SEA RESEARCH	98	91	10.1016/j.seares.2014.11.004	2015	1385-1101
Arevalo, Jose R.; Fernandez-Lugo, Silvia; Mellado, Miguel; de la Concepcion, Tamar	Experimental management control of Opuntia dillenii Haw. and Agave americana L. in Teno Rural Park, Canary Islands	PLANT SPECIES BIOLOGY	30	137	10.1111/1442-1984.12049	2015	0913-557X
Bugnot, Ana B.; Coleman, Ross A.; Figueira, Will F.; Marzinelli, Ezequiel M.	Community-level impacts of the invasive isopod Cirolana harfordi	BIOLOGICAL INVASIONS	17	1149	10.1007/s10530-014-0785-z	2015	1387-3547
Robinson, Tamara B.; Swart, Cheruscha	Distribution and impact of the alien anemone Sagartia ornata in the West Coast National Park	KOEDOE	57		10.4102/koedoe.v57i1.1246	2015	0075-6458
Novais, Adriana; Souza, Allan T.; Ilarri, Martina; Pascoal, Claudia; Sousa, Ronaldo	Facilitation in the low intertidal: effects of an invasive species on the structure of an estuarine macrozoobenthic assemblage	MARINE ECOLOGY PROGRESS SERIES	522	157	10.3354/meps11168	2015	0171-8630
Albins, Mark A.	Invasive Pacific lionfish Pterois volitans reduce abundance and species richness of native Bahamian coral-reef fishes	MARINE ECOLOGY PROGRESS SERIES	522	231	10.3354/meps11159	2015	0171-8630
Mollo, Ernesto; Cimino, Guido; Ghiselin, Michael T.	Alien biomolecules: a new challenge for natural product chemists	BIOLOGICAL INVASIONS	17	941	10.1007/s10530-014-0835-6	2015	1387-3547
Gooden, Ben; French, Kris	Impacts of alien plant invasion on native plant communities are mediated by functional identity of resident species, not resource availability	OIKOS	124	298	10.1111/oik.01724	2015	0030-1299
Hua, Ning; Tan, Kun; Chen, Ying; Ma, Zhijun	Key research issues concerning the conservation of migratory shorebirds in the Yellow Sea region	BIRD CONSERVATION INTERNATIONAL	25	38	10.1017/S0959270914000380	2015	0959-2709
Zabin, Chela J.	Patterns of adult abundance vary with recruitment of an invasive barnacle species on Oahu, Hawaii	JOURNAL OF EXPERIMENTAL MARINE BIOLOGY AND ECOLOGY	464	44	10.1016/j.jembe.2014.12.009	2015	0022-0981
Brandl, Scott; Schumer, Gregg; Schreier, Brian M.; Conrad, Jessica L.; May, Bernie; Baerwald, Melinda R.	Ten real-time PCR assays for detection of fish predation at the community level in the San Francisco Estuary-Delta	MOLECULAR ECOLOGY RESOURCES	15	278	10.1111/1755-0998.12305	2015	1755-098X
Hollander, Johan; Blomfeldt, Johan; Carlsson, Per; Strand, Asa	Effects of the alien Pacific oyster (Crassostrea gigas) on subtidal macrozoobenthos communities	MARINE BIOLOGY	162	547	10.1007/s00227-014-2604-6	2015	0025-3162
Varela-Alvarez, Elena; Balau, Ana C.; Marba, Nuria; Afonso-Carrillo, Julio; Duarte, Carlos M.; Serrao, Ester A.	Genetic diversity and biogeographical patterns of Caulerpa prolifera across the Mediterranean and Mediterranean/Atlantic transition zone	MARINE BIOLOGY	162	557	10.1007/s00227-014-2605-5	2015	0025-3162
Elias, Rodolfo; Jaubet, Maria L.; Llanos, Elizabeth N.; Sanchez, Maria A.; Rivero, Maria S.; Garaffo, Griselda V.; Sandrini-Neto, Leonardo	Effect of the invader Boccardia proboscidea (Polychaeta: Spionidae) on richness, diversity and structure of SW Atlantic epilithic intertidal community	MARINE POLLUTION BULLETIN	91	530	10.1016/j.marpolbul.2014.10.007	2015	0025-326X
Caronni, Sarah; Calabretti, Chiara; Delaria, Maria Anna; Bernardi, Giuseppe; Navone, Augusto; Occhipinti-Ambrogi, Anna; Panzalis, Pieraugusto; Ceccherelli, Giulia	Consumer Depletion Alters Seagrass Resistance to an Invasive Macroalga	PLOS ONE	10		10.1371/journal.pone.0115858	2015	1932-6203
Johnson, Matthew D.; De Leon, Yesenia L.	Effect of an Invasive Plant and Moonlight on Rodent Foraging Behavior in a Coastal Dune Ecosystem	PLOS ONE	10		10.1371/journal.pone.0117903	2015	1932-6203
Xia, Jian-Ping; Sun, Hong-Xiang	Acoustic focusing by metal circular ring structure	APPLIED PHYSICS LETTERS	106		10.1063/1.4908117	2015	0003-6951
David, Aaron S.; Zarnetske, Phoebe L.; Hacker, Sally D.; Ruggiero, Peter; Biel, Reuben G.; Seabloom, Eric W.	Invasive Congeners Differ in Successional Impacts across Space and Time	PLOS ONE	10		10.1371/journal.pone.0117283	2015	1932-6203
Steelman, C. M.; Kennedy, C. S.; Parker, B. L.	Geophysical conceptualization of a fractured sedimentary bedrock riverbed using ground-penetrating radar and induced electrical conductivity	JOURNAL OF HYDROLOGY	521	433	10.1016/j.jhydrol.2014.12.001	2015	0022-1694
Oppel, Steffen; Gray, Gerard; Daley, James; Mendes, Stephen; Fenton, Calvin; Galbraith, Gemma; Daniel, Shawn; Millett, James	Important Bird Areas Montserrat	British Birds	108	80		2015	0007-0335
Elise, Simon; Urbina-Barreto, Isabel; Boadas-Gil, Hazael; Galindo-Vivas, Miguel; Kulbicki, Michel	No detectable effect of lionfish (Pterois volitans and P-miles) invasion on a healthy reef fish assemblage in Archipelago Los Roques National Park, Venezuela	MARINE BIOLOGY	162	319	10.1007/s00227-014-2571-y	2015	0025-3162
Bulleri, Fabio; Piazzi, Luigi	Variations in importance and intensity of competition underpin context dependency in the effects of an invasive seaweed on resident assemblages	MARINE BIOLOGY	162	485	10.1007/s00227-014-2563-y	2015	0025-3162
Kuebbing, Sara E.; Nunez, Martin A.	Negative, neutral, and positive interactions among nonnative plants: patterns, processes, and management implications	GLOBAL CHANGE BIOLOGY	21	926	10.1111/gcb.12711	2015	1354-1013
Joshi, Himala; Marimuthu, N.	Forbidding invasive species-a way to attain sustainability of the coastal ecosystem	CURRENT SCIENCE	108	151		2015	0011-3891
Thomsen, Mads Solgaard; Wernberg, Thomas; Schiel, David	Invasions by non-indigenous species	Marine Ecosystems: Human Impacts on Biodiversity, Functioning and Services		274		2015
Mayer-Pinto, M.; Johnston, E. L.; Hutchings, P. A.; Marzinelli, E. M.; Ahyong, S. T.; Birch, G.; Booth, D. J.; Creese, R. G.; Doblin, M. A.; Figueira, W.; Gribben, P. E.; Pritchard, T.; Roughan, M.; Steinberg, P. D.; Hedge, L. H.	Sydney Harbour: a review of anthropogenic impacts on the biodiversity and ecosystem function of one of the world's largest natural harbours	MARINE AND FRESHWATER RESEARCH	66	1088	10.1071/MF15157	2015	1323-1650
Sylvester, Francisco; Sardina, Paula	Relationships of Limnoperna fortunei with Benthic Animals	Limnoperna Fortunei: The Ecology, Distribution and Control of a Swiftly Spreading Invasive Fouling Mussel	10	191	10.1007/978-3-319-13494-9_11	2015	1874-7809(print)
Kersting, Diego K; Cebrian, Emma; Casado, Clara; Teixido, Nuria; Garrabou, Joaquim; Linares, Cristina	Experimental evidence of the synergistic effects of warming and invasive algae on a temperate reef-builder coral.	Scientific reports	5	18635	10.1038/srep18635	2015
Jahanban-Esfahlan, Rana; Abasi, Mozhgan; Sani, Hakimeh Moghaddas; Abbasi, Mehran Mesgari; Akbarzadeh, Abolfazl	Anti-Proliferative Effects of Hesa-A on Human Cancer Cells with Different Metastatic Potential.	Asian Pacific journal of cancer prevention : APJCP	16	6963		2015	1513-7368
박경안	A Study on Interrelations between The Aliean’s Settlements and Their Cultural Traits in Early Goryeo Dynasty	The Journal of Korean Medieval History	42	247		2015	1225-8970
Ruffino, Lise; Zarzoso-Lacoste, Diane; Vidal, Eric	Assessment of invasive rodent impacts on island avifauna: methods, limitations and the way forward	WILDLIFE RESEARCH	42	185	10.1071/WR15047	2015	1035-3712
Sant'Anna, Bruno Sampaio; Branco, Joaquim Olinto; de Oliveira, Michel Mattar; Boos, Harry; Turra, Alexander	Diet and population biology of the invasive crab Charybdis hellerii in southwestern Atlantic waters	MARINE BIOLOGY RESEARCH	11	814	10.1080/17451000.2015.1024134	2015	1745-1000
Bedini, Roberto; Bedini, Marco; Bonechi, Lisa; Piazzi, Luigi	Effects of non-native turf-forming Rhodophyta on mobile macro-invertebrate assemblages in the north-western Mediterranean Sea	MARINE BIOLOGY RESEARCH	11	430	10.1080/17451000.2014.952310	2015	1745-1000
Aguirre-Pabon, J. C.; Orozco Berdugo, G. Jr.; Narvaez Barandica, J. C.	GENETIC STATUS, SOURCE AND ESTABLISHMENT RISK OF THE GIANT TIGER SHRIMP (PENAEIDAE: Penaeus monodon), AN INVASIVE SPECIES IN COLOMBIAN CARIBBEAN WATERS	Acta Biologica Colombiana	20	117		2015	0120-548X
Paz Esquivias, M; Zunzunegui, Maria; Diaz Barradas, Mari Cruz; Alvarez-Cansino, Leonor	Competitive effect of a native-invasive species on a threatened shrub in a Mediterranean dune system.	Oecologia	177	133	10.1007/s00442-014-3106-4	2015
Sugawara, Hirotaka; Takahashi, Hiroo; Hayashi, Fumio	Microsatellite Analysis of the Population Genetic Structure of Anolis carolinensis Introduced to the Ogasawara Islands	ZOOLOGICAL SCIENCE	32	47	10.2108/zs140041	2015	0289-0003
Hannam, Michael P.; Wyllie-Echeverria, Sandy	Microtopography promotes coexistence of an invasive seagrass and its native congener	BIOLOGICAL INVASIONS	17	381	10.1007/s10530-014-0736-8	2015	1387-3547
Chen, Huili; Zhang, Pei; Li, Bo; Wu, Jihua	Invasive cordgrass facilitates epifaunal communities in a Chinese marsh	BIOLOGICAL INVASIONS	17	205	10.1007/s10530-014-0720-3	2015	1387-3547
Paz Esquivias, M.; Zunzunegui, Maria; Diaz Barradas, Mari Cruz; Alvarez-Cansino, Leonor	Competitive effect of a native-invasive species on a threatened shrub in a Mediterranean dune system	OECOLOGIA	177	133	10.1007/s00442-014-3106-4	2015	0029-8549
Maggi, E.; Benedetti-Cecchi, L.; Castelli, A.; Chatzinikolaou, E.; Crowe, T. P.; Ghedini, G.; Kotta, J.; Lyons, D. A.; Ravaglioli, C.; Rilov, G.; Rindi, L.; Bulleri, F.	Ecological impacts of invading seaweeds: a meta-analysis of their effects at different trophic levels	DIVERSITY AND DISTRIBUTIONS	21	1	10.1111/ddi.12264	2015	1366-9516
Smith, Brian E.; Collie, Jeremy S.; Lengyel, Nicole L.	Fish trophic engineering: Ecological effects of the invasive ascidian Didemnum vexillum (Georges Bank, northwestern Atlantic)	JOURNAL OF EXPERIMENTAL MARINE BIOLOGY AND ECOLOGY	461	489	10.1016/j.jembe.2014.09.009	2014	0022-0981
Arula, T.; Ojaveer, H.; Klais, R.	Impact of extreme climate and bioinvasion on temporal coupling of spring herring (Clupea harengus m.) larvae and their prey	MARINE ENVIRONMENTAL RESEARCH	102	102	10.1016/j.marenvres.2014.05.001	2014	0141-1136
Zhang, Haibin; Geller, Jonathan B.; Vrijenhoek, Robert C.	Genetic diversity in native and introduced populations of the amethyst gem clam Gemma gemma (Totten, 1834) from the U.S. east and west coasts	BIOLOGICAL INVASIONS	16	2725	10.1007/s10530-014-0699-9	2014	1387-3547
Bellard, Celine; Leclerc, Camille; Leroy, Boris; Bakkenes, Michel; Veloz, Samuel; Thuiller, Wilfried; Courchamp, Franck	Vulnerability of biodiversity hotspots to global change	GLOBAL ECOLOGY AND BIOGEOGRAPHY	23	1376	10.1111/geb.12228	2014	1466-822X
Cai, L. -Z.; Hwang, J. -S.; Dahms, H. -U.; Fu, S. -J.; Zhuo, Y.; Guo, T.	Effect of the invasive bivalve Mytilopsis sallei on the macrofaunal fouling community and the environment of Yundang Lagoon, Xiamen, China	HYDROBIOLOGIA	741	101	10.1007/s10750-014-2012-4	2014	0018-8158
Magalhaes, Wagner F.; Bailey-Brock, Julie H.	Polychaete assemblages associated with the invasive green alga Avrainvillea amadelpha and surrounding bare sediment patches in Hawaii	Memoirs of Museum Victoria	71	161		2014	1447-2546
Pec, Gregory J.; Carlton, Gary C.	Positive Effects of Non-Native Grasses on the Growth of a Native Annual in a Southern California Ecosystem	PLOS ONE	9		10.1371/journal.pone.0112437	2014	1932-6203
Zeug, Steven C.; Brodsky, Annie; Kogut, Nina; Stewart, A. Robin; Merz, Joseph E.	Ancient fish and recent invaders: white sturgeon Acipenser transmontanus diet response to invasive-species-mediated changes in a benthic prey assemblage	MARINE ECOLOGY PROGRESS SERIES	514	163	10.3354/meps11002	2014	0171-8630
Katsanevakis, Stelios; Wallentinus, Inger; Zenetos, Argyro; Leppakoski, Erkki; Cinar, Melih Ertan; Ozturk, Bayram; Grabowski, Michal; Golani, Daniel; Cardoso, Ana Cristina	Impacts of invasive alien marine species on ecosystem services and biodiversity: a pan-European review	AQUATIC INVASIONS	9	391	10.3391/ai.2014.9.4.01	2014	1798-6540
Eash-Loucks, Wendy E.; Kimball, Matthew E.; Petrinec, Kathryn M.	LONG-TERM CHANGES IN AN ESTUARINE MUD CRAB COMMUNITY: EVALUATING THE IMPACT OF NON-NATIVE SPECIES	JOURNAL OF CRUSTACEAN BIOLOGY	34	731	10.1163/1937240X-00002287	2014	0278-0372
Pan, Jeronimo; Alejandra Marcoval, M.	Top-Down Effects of an Exotic Serpulid Polychaete on Natural Plankton Assemblage of Estuarine and Brackish Systems in the SW Atlantic	JOURNAL OF COASTAL RESEARCH	30	1226	10.2112/JCOASTRES-D-12-00163.1	2014	0749-0208
Beltran, Roxanne S.; Kreidler, Nissa; Van Vuren, Dirk H.; Morrison, Scott A.; Zavaleta, Erika S.; Newton, Kelly; Tershy, Bernie R.; Croll, Donald A.	Passive Recovery of Vegetation after Herbivore Eradication on Santa Cruz Island, California	RESTORATION ECOLOGY	22	790	10.1111/rec.12144	2014	1061-2971
Black, Andrew N.; Weimann, Sonia R.; Imhoff, Vance E.; Richter, Martin L.; Itzkowitz, Murray	A differential prey response to invasive lionfish, Pterois volitans: Prey naivete and risk-sensitive courtship	JOURNAL OF EXPERIMENTAL MARINE BIOLOGY AND ECOLOGY	460	1	10.1016/j.jembe.2014.06.002	2014	0022-0981
Dickens, Sara Jo M.; Allen, Edith B.	Soil nitrogen cycling is resilient to invasive annuals following restoration of coastal sage scrub	JOURNAL OF ARID ENVIRONMENTS	110	12	10.1016/j.jaridenv.2014.05.009	2014	0140-1963
Cinar, Melih Ertan; Bakir, Kerem	ALien Biotic IndEX (ALEX) - A new index for assessing impacts of alien species on benthic communities	MARINE POLLUTION BULLETIN	87	171	10.1016/j.marpolbul.2014.07.061	2014	0025-326X
Nordstrom, Karl F.	Living with shore protection structures: A review	ESTUARINE COASTAL AND SHELF SCIENCE	150	11	10.1016/j.ecss.2013.11.003	2014	0272-7714
Cano, Lidia; Campos, Juan Antonio; Garcia-Magro, Daniel; Herrera, Mercedes	Invasiveness and impact of the non-native shrub Baccharis halimifolia in sea rush marshes: fine-scale stress heterogeneity matters	BIOLOGICAL INVASIONS	16	2063	10.1007/s10530-014-0648-7	2014	1387-3547
Smith, Jayson R.; Vogt, Sean C.; Creedon, Faye; Lucas, Benjamin J.; Eernisse, Douglas J.	The non-native turf-forming alga Caulacanthus ustulatus displaces space-occupants but increases diversity	BIOLOGICAL INVASIONS	16	2195	10.1007/s10530-014-0658-5	2014	1387-3547
Werschkun, Barbara; Banerji, Sangeeta; Basurko, Oihane C.; David, Matej; Fuhr, Frank; Gollasch, Stephan; Grummt, Tamara; Haarich, Michael; Jha, Awadhesh N.; Kacan, Stefan; Kehrer, Anja; Linders, Jan; Mesbahi, Ehsan; Pughiuc, Dandu; Richardson, Susan D.; Schwarz-Schulz, Beatrice; Shah, Amisha; Theobald, Norbert; von Gunten, Urs; Wieck, Stefanie; Hoefer, Thomas	Emerging risks from ballast water treatment: The run-up to the International Ballast Water Management Convention	CHEMOSPHERE	112	256	10.1016/j.chemosphere.2014.03.135	2014	0045-6535
Marcantonio, Matteo; Rocchini, Duccio; Ottaviani, Gianluigi	Impact of alien species on dune systems: a multifaceted approach	BIODIVERSITY AND CONSERVATION	23	2645	10.1007/s10531-014-0742-2	2014	0960-3115
Ruesink, J. L.; Freshley, N.; Herrold, S.; Trimble, A. C.; Patten, K.	Influence of substratum on non-native clam recruitment in Willapa Bay, Washington, USA	JOURNAL OF EXPERIMENTAL MARINE BIOLOGY AND ECOLOGY	459	23	10.1016/j.jembe.2014.05.010	2014	0022-0981
McKenzie, Len J.; Yoshida, Rudi L.; Unsworth, Richard K. F.	Disturbance influences the invasion of a seagrass into an existing meadow	MARINE POLLUTION BULLETIN	86	186	10.1016/j.marpolbul.2014.07.019	2014	0025-326X
Novoa, Ana; Gonzalez, Luis	Impacts of Carpobrotus edulis (L.) NEBr. on the Germination, Establishment and Survival of Native Plants: A Clue for Assessing Its Competitive Strength	PLOS ONE	9		10.1371/journal.pone.0107557	2014	1932-6203
Sousa da Rocha, Antonio Elielson; Miranda, Izildinha de Souza; da Costa Neto, Salustiano Vilar	Floristic composition and identification keys for Poaceae from the Amazonian coastal savannas, Brazil	ACTA AMAZONICA	44	301	10.1590/1809-4392201305173	2014	0044-5967
Barbieri, Edison; Marquez, Hélcio Luiz de Almeida; Campolim, Marcos Buhrer; Salvarani, Patrícia Ishisaki	Avaliação dos Impactos ambientais e socioeconômicos da aquicultura na região estuarina-lagunar de Cananéia, São Paulo, Brasil	Revista de Gestão Costeira Integrada	14	385	10.5894/rgci486	2014	1646-8872
Portz, Luana; Rockett, Gabriela Camboim; Franchini, Ricardo Augusto Lengler; Manzolli, Rogério Portantiolo; Gruber, Nelson Luiz Sambaqui	Gestão de dunas costeiras: o uso de sistema de informações geográficas (SIG) na implantação de planos de gestão no litoral do Rio Grande do Sul, Brasil	Revista de Gestão Costeira Integrada	14	517	10.5894/rgci445	2014	1646-8872
Henn, Jonathan J.; McCoy, Michael B.; Vaughan, Christopher S.	Beach almond (Terminalia catappa, Combretaceae) seed production and predation by scarlet macaws (Ara macao) and variegated squirrels (Sciurus variegatoides)	REVISTA DE BIOLOGIA TROPICAL	62	929		2014	0034-7744
Carey, Eric; Gape, Lynn; Manco, B. Naqqi; Hepburn, Dion; Smith, Ross L.; Knowles, Lindy; Knowles, David; Daniels, Mark; Vincent, Michael A.; Freid, Ethan; Jestrow, Brett; Griffith, M. Patrick; Calonje, Michael; Meerow, Alan W.; Stevenson, Dennis W.; Francisco-Ortega, Javier	Plant Conservation Challenges in the Bahama Archipelago	BOTANICAL REVIEW	80	265	10.1007/s12229-014-9140-4	2014	0006-8101
Galgani, F.; Claro, F.; Depledge, M.; Fossi, C.	Monitoring the impact of litter in large vertebrates in the Mediterranean Sea within the European Marine Strategy Framework Directive (MSFD): Constraints, specificities and recommendations	MARINE ENVIRONMENTAL RESEARCH	100	3	10.1016/j.marenvres.2014.02.003	2014	0141-1136
Rabelo, Leandro Bonesi; Hashimoto Soares, Lucy Satiko	FEEDING INTERACTION OF THE NON-NATIVE AFRICAN CATFISH (Clarias gariepinus BURCHELL, 1822) IN ITANHEM RIVER ESTUARY, BAHIA, BRAZIL	BRAZILIAN JOURNAL OF OCEANOGRAPHY	62	179	10.1590/S1679-87592014051406203	2014	1679-8759
Li, Hui; Zhang, Xiameng; Zheng, Rushui; Li, Xiao; Elmer, Wade H.; Wolfe, Lorne M.; Li, Bo	Indirect effects of non-native Spartina alterniflora and its fungal pathogen (Fusarium palustre) on native saltmarsh plants in China	JOURNAL OF ECOLOGY	102	1112	10.1111/1365-2745.12285	2014	0022-0477
Geraldi, Nathan R.; Smyth, Ashley R.; Piehler, Michael F.; Peterson, Charles H.	Artificial substrates enhance non-native macroalga and N-2 production	BIOLOGICAL INVASIONS	16	1819	10.1007/s10530-013-0629-2	2014	1387-3547
Kleinhesselink, Andrew R.; Magnoli, Susan M.; Cushman, J. Hall	Shrubs as ecosystem engineers across an environmental gradient: effects on species richness and exotic plant invasion	OECOLOGIA	175	1277	10.1007/s00442-014-2972-0	2014	0029-8549
Harvey, Kerinne J.; Britton, David R.; Minchinton, Todd E.	Detecting impacts of non-native species on associated invertebrate assemblages depends on microhabitat	AUSTRAL ECOLOGY	39	511	10.1111/aec.12111	2014	1442-9985
Kersting, Diego K.; Ballesteros, Enric; De Caralt, Sonia; Linares, Cristina	Invasive macrophytes in a marine reserve (Columbretes Islands, NW Mediterranean): spread dynamics and interactions with the endemic scleractinian coral Cladocora caespitosa	BIOLOGICAL INVASIONS	16	1599	10.1007/s10530-013-0594-9	2014	1387-3547
Malumphy, Chris	An annotated checklist of scale insects (Hemiptera: Coccoidea) of Saint Lucia, Lesser Antilles	ZOOTAXA	3846	69		2014	1175-5326
Lejeusne, Christophe; Saunier, Alice; Petit, Nicolas; Beguer, Melanie; Otani, Michio; Carlton, James T.; Rico, Ciro; Green, Andy J.	High genetic diversity and absence of founder effects in a worldwide aquatic invader	SCIENTIFIC REPORTS	4		10.1038/srep05808	2014	2045-2322
Augyte, Simona; Pickart, Andrea	Algal Response to Removal of the Invasive Cordgrass Spartina densiflora in a Salt Marsh at Humboldt Bay, California, USA	NATURAL AREAS JOURNAL	34	325		2014	0885-8608
Tobin, Patrick C.; Gray, David R.; Liebhold, Andrew M.	Supraoptimal temperatures influence the range dynamics of a non-native insect	DIVERSITY AND DISTRIBUTIONS	20	813	10.1111/ddi.12197	2014	1366-9516
Fukunaga, Atsuko; Peyton, Kimberly A.; Thomas, Florence I. M.	Epifaunal community structure and ammonium uptake compared for the invasive algae, Gracilaria salicornia and Acanthophora specifera, and the native alga, Padina thivyi	JOURNAL OF EXPERIMENTAL MARINE BIOLOGY AND ECOLOGY	456	78	10.1016/j.jembe.2014.03.013	2014	0022-0981
Terauds, Aleks; Doube, James; McKinlay, John; Springer, Keith	Using long-term population trends of an invasive herbivore to quantify the impact of management actions in the sub-Antarctic	POLAR BIOLOGY	37	833	10.1007/s00300-014-1485-y	2014	0722-4060
Felline, Serena; Mollo, Ernesto; Ferramosca, Alessandra; Zara, Vincenzo; Regoli, Francesco; Gorbi, Stefania; Terlizzi, Antonio	Can a marine pest reduce the nutritional value of Mediterranean fish flesh?	MARINE BIOLOGY	161	1275	10.1007/s00227-014-2417-7	2014	0025-3162
Wang, Sikai; Chu, Tianjiang; Huang, Danqing; Li, Bo; Wu, Jihua	Incorporation of Exotic Spartina alterniflora into Diet of Deposit-Feeding Snails in the Yangtze River Estuary Salt Marsh: Stable Isotope and Fatty Acid Analyses	ECOSYSTEMS	17	567	10.1007/s10021-013-9743-3	2014	1432-9840
Gooden, Ben; French, Kris	Non-interactive effects of plant invasion and landscape modification on native communities	DIVERSITY AND DISTRIBUTIONS	20	626	10.1111/ddi.12178	2014	1366-9516
Bhattarai, Ganesh P.; Cronin, James T.	Hurricane Activity and the Large-Scale Pattern of Spread of an Invasive Plant Species	PLOS ONE	9		10.1371/journal.pone.0098478	2014	1932-6203
Kamalakannan, B.; Jeevamani, J. Joyson Joe; Nagendran, N. Arun; Pandiaraja, D.; Chandrasekaran, S.	Impact of removal of invasive species Kappaphycus alvarezii from coral reef ecosystem in Gulf of Mannar, India	CURRENT SCIENCE	106	1401		2014	0011-3891
Marba, Nuria; Arthur, Rohan; Alcoverro, Teresa	Getting turfed: The population and habitat impacts of Lophocladia lallemandii invasions on endemic Posidonia oceanica meadows	AQUATIC BOTANY	116	76	10.1016/j.aquabot.2014.01.006	2014	0304-3770
Gooden, Ben; French, Kris; Robinson, Sharon A.	Alien grass disrupts reproduction and post-settlement recruitment of co-occurring native vegetation: a mechanism for diversity decline in invaded forest?	PLANT ECOLOGY	215	567	10.1007/s11258-014-0324-0	2014	1385-0237
Dickens, S. J. M.; Allen, E. B.	Exotic plant invasion alters chaparral ecosystem resistance and resilience pre- and post-wildfire	BIOLOGICAL INVASIONS	16	1119	10.1007/s10530-013-0566-0	2014	1387-3547
Green, Dannielle S.; Crowe, Tasman P.	Context- and density-dependent effects of introduced oysters on biodiversity	BIOLOGICAL INVASIONS	16	1145	10.1007/s10530-013-0569-x	2014	1387-3547
Ilarri, M. I.; Souza, A. T.; Antunes, C.; Guilhermino, L.; Sousa, R.	Influence of the invasive Asian clam Corbicula fluminea (Bivalvia: Corbiculidae) on estuarine epibenthic assemblages	ESTUARINE COASTAL AND SHELF SCIENCE	143	12	10.1016/j.ecss.2014.03.017	2014	0272-7714
Byers, James E.; Smith, Rachel S.; Weiskel, Heidi W.; Robertson, Charles Y.	A Non-Native Prey Mediates the Effects of a Shared Predator on an Ecosystem Service	PLOS ONE	9		10.1371/journal.pone.0093969	2014	1932-6203
Cote, Isabelle M.; Darling, Emily S.; Malpica-Cruz, Luis; Smith, Nicola S.; Green, Stephanie J.; Curtis-Quick, Jocelyn; Layman, Craig	What Doesn't Kill You Makes You Wary? Effect of Repeated Culling on the Behaviour of an Invasive Predator	PLOS ONE	9		10.1371/journal.pone.0094248	2014	1932-6203
Krushelnycky, Paul D.; Ogura-Yamada, Cassandra S.; King, Cynthia B. A.	New records of arthropods from the Hawaiian Islands	Bishop Museum Occasional Papers	115	39		2014	0893-1348
Deudero, S.; Box, A.; Vazquez-Luis, M.; Arroyo, N. L.	Benthic community responses to macroalgae invasions in seagrass beds: Diversity, isotopic niche and food web structure at community level	ESTUARINE COASTAL AND SHELF SCIENCE	142	12	10.1016/j.ecss.2014.03.006	2014	0272-7714
Thomsen, Meredith A.; D'Antonio, Carla M.	HOW DOES SIMULATED GOPHER DISTURBANCE AFFECT THE ESTABLISHMENT OF HOLCUS LANATUS L. (POACEAE) IN CALFORNIA COASTAL PRAIRIE?	Madrono	61	218		2014	0024-9637
Shiels, Aaron B.; Pitt, William C.; Sugihara, Robert T.; Witmer, Gary W.	Biology and Impacts of Pacific Island Invasive Species. 11. Rattus rattus, the Black Rat (Rodentia: Muridae)	PACIFIC SCIENCE	68	145	10.2984/68.2.1	2014	0030-8870
O'Shaughnessy, Kathryn A.; Harding, Juliana M.; Burge, Erin J.	Ecological effects of the invasive parasite Loxothylacus panopaei on the flatback mud crab Eurypanopeus depressus with implications for estuarine communities	BULLETIN OF MARINE SCIENCE	90	611	10.5343/bms.2013.1060	2014	0007-4977
Xystrakis, Fotios; Theodoropoulos, Kostantinos; Eleftheriadou, Eleni; Samaras, Dimitrios A.; Damianidis, Christos; Papadopoulos, Theodoros	Succession rates and patterns twelve years after land use abandonment in the estuary of the River Aliakmon, N. Greece	ACTA BOTANICA CROATICA	73	21	10.2478/botcro-2013-0021	2014	0365-0588
Tamburello, Laura; Bulleri, Fabio; Balata, David; Benedetti-Cecchi, Lisandro	The role of overgrazing and anthropogenic disturbance in shaping spatial patterns of distribution of an invasive seaweed	JOURNAL OF APPLIED ECOLOGY	51	406	10.1111/1365-2664.12199	2014	0021-8901
Sanford, Eric; Gaylord, Brian; Hettinger, Annaliese; Lenz, Elizabeth A.; Meyer, Kirstin; Hill, Tessa M.	Ocean acidification increases the vulnerability of native oysters to predation by invasive snails	PROCEEDINGS OF THE ROYAL SOCIETY B-BIOLOGICAL SCIENCES	281		10.1098/rspb.2013.2681	2014	0962-8452
Miller, Nathan A.; Chen, Xi; Stillman, Jonathon H.	Metabolic Physiology of the Invasive Clam, Potamocorbula amurensis: The Interactive Role of Temperature, Salinity, and Food Availability	PLOS ONE	9		10.1371/journal.pone.0091064	2014	1932-6203
Collingridge, Kate; van der Molen, Johan; Pitois, Sophie	Modelling risk areas in the North Sea for blooms of the invasive comb jelly Mnemiopsis leidyi A. Agassiz, 1865	AQUATIC INVASIONS	9	21	10.3391/ai.2014.9.1.02	2014	1798-6540
Glodosky, Christopher M.; Sandland, Gregory J.	Assessing host competency between native and invasive snail species exposed to the native parasite Echinostoma revolutum	AQUATIC INVASIONS	9	87	10.3391/ai.2014.9.1.07	2014	1798-6540
Gooden, Ben; French, Kris	Impacts of alien grass invasion in coastal seed banks vary amongst native growth forms and dispersal strategies	BIOLOGICAL CONSERVATION	171	114	10.1016/j.biocon.2014.01.005	2014	0006-3207
Otto, Rudiger; Arteaga, Manuel A.; Delgado, Juan D.; Arevalo, Jose R.; Blandino, Cristina; Fernandez-Palacios, Jose M.	Road Edge Effect and Elevation Patterns of Native and Alien Plants on an Oceanic Island (Tenerife, Canary Islands)	FOLIA GEOBOTANICA	49	65	10.1007/s12224-013-9159-z	2014	1211-9520
Brousscau, Diane J.; Goldberg, Ronald; Garza, Corey	Impact of Predation by the Invasive Crab Hemigrapsus sanguineus on Survival of Juvenile Blue Mussels in Western Long Island Sound	NORTHEASTERN NATURALIST	21	119	10.1656/045.021.0110	2014	1092-6194
Ros, Macarena; Manuel Tierno de Figueroa, Jose; Manuel Guerra-Garcia, Jose; Navarro-Barranco, Carlos; Baptista Lacerda, Mariana; Vazquez-Luis, Maite; Masunari, Setuko	Exploring trophic strategies of exotic caprellids (Crustacea: Amphipoda): Comparison between habitat types and native vs introduced distribution ranges	ESTUARINE COASTAL AND SHELF SCIENCE	139	88	10.1016/j.ecss.2013.12.033	2014	0272-7714
Vaz-Pinto, Fatima; Olabarria, Celia; Arenas, Francisco	ECOSYSTEM FUNCTIONING IMPACTS OF THE INVASIVE SEAWEED SARGASSUM MUTICUM (FUCALES, PHAEOPHYCEAE)	JOURNAL OF PHYCOLOGY	50	108	10.1111/jpy.12136	2014	0022-3646
Ma, Zhijun; Gan, Xiaojing; Choi, Chi-Yeung; Li, Bo	Effects of Invasive Cordgrass on Presence of Marsh Grassbird in an Area where It Is Not Native	CONSERVATION BIOLOGY	28	150	10.1111/cobi.12172	2014	0888-8892
Palmer, Geoffrey H.; Koprowski, John L.; Pernas, Anthony J.	Distribution and spread of an introduced insular population of red-bellied squirrels (Sciurus aureogaster) in Florida	MAMMALIA	78	67	10.1515/mammalia-2012-0141	2014	0025-1461
Cook, Roy W.; Talley, Theresa Sinicrope	The invertebrate communities associated with a Chrysanthemum coronarium-invaded coastal sage scrub area in Southern California	BIOLOGICAL INVASIONS	16	365	10.1007/s10530-013-0526-8	2014	1387-3547
Novoa, A.; Rodriguez, R.; Richardson, D.; Gonzalez, L.	Soil quality: a key factor in understanding plant invasion? The case of Carpobrotus edulis (L.) N.E.Br.	BIOLOGICAL INVASIONS	16	429	10.1007/s10530-013-0531-y	2014	1387-3547
Reponen, Sini E. M.; Brown, Sarah K.; Barnett, Bruce D.; Sacks, Benjamin N.	Genetic and morphometric evidence on a Galapagos Island exposes founder effects and diversification in the first-known (truly) feral western dog population	MOLECULAR ECOLOGY	23	269	10.1111/mec.12595	2014	0962-1083
Pinnegar, John K.; Tomczak, Maciej T.; Link, Jason S.	How to determine the likely indirect food-web consequences of a newly introduced non-native species: A worked example	ECOLOGICAL MODELLING	272	379	10.1016/j.ecolmode1.2013.09.027	2014	0304-3800
Gili, Josep-Maria; Sarda, Rafael; Madurell, Teresa; Rossi, Sergi	Zoobenthos	Mediterranean Sea: Its History and Present Challenges		213	10.1007/978-94-007-6704-1_12	2014
Lee, Kyung-Gyu; CHIL, YOO JEONG; 남기백; 황재웅	Variation in Breeding Burrows of Streaked Shearwaters Breeding in Sasu Island, and Predation Rates by Norway Rats	Ocean and Polar Research	36	49	10.4217/OPR.2014.36.1.049	2014	1598-141X
Sorte, Cascade J. B.	Synergies between Climate Change and Species Invasions: Evidence from Marine Systems	Invasive Species and Global Climate Change	4	101		2014
Kirtsideli, I. Yu.; Vlasov, D. Yu.; Barantsevich, E. P.; Klylenkov, V. A.; Sokolov, V. T.	MICROFUNGI FROM SOIL OF POLAR ISLAND IZVESTIA TSIK (KARA SEA)	Mikologiya i Fitopatologiya	48	365		2014	0026-3648
Meric, Engin; Avsar, Niyazi; Yokes, Mehmet Baki; Dincer, Feyza	Atlas of Recent Benthic foraminifera from Turkey	MICROPALEONTOLOGY	60	211		2014	0026-2803
Gu, Dang E.; Luo, Du; Xu, Meng; Ma, Guang M.; Mu, Xi D.; Luo, Jian R.; Hu, Yin C.	Species diversity defends against the invasion of Nile tilapia (Oreochromis niloticus)	KNOWLEDGE AND MANAGEMENT OF AQUATIC ECOSYSTEMS			10.1051/kmae/2014018	2014	1961-9502
Liu, Yajie; Olaussen, Jon Olaf; Skonhoft, Anders	FISHY FISH? THE ECONOMIC IMPACTS OF ESCAPED FARMED FISH	AQUACULTURE ECONOMICS & MANAGEMENT	18	273	10.1080/13657305.2014.926466	2014	1365-7305
Gestoso, Ignacio; Arenas, Francisco; Olabarria, Celia	Biotic resistance and facilitation of a non-indigenous mussel vary with environmental context	MARINE ECOLOGY PROGRESS SERIES	506	163	10.3354/meps10828	2014	0171-8630
Thomsen, Mads S.; Byers, James E.; Schiel, David R.; Bruno, John F.; Olden, Julian D.; Wernberg, Thomas; Silliman, Brian R.	Impacts of marine invaders on biodiversity depend on trophic position and functional similarity	MARINE ECOLOGY PROGRESS SERIES	495	39	10.3354/meps10566	2014	0171-8630
Catanzaro, Roberto; Celep, Gulcin; Zerbinati, Nicola; Papacharalambous, Michael; Nagpal, Ravinder; Marotta, Francesco; Rastmanesh, Reza; Milazzo, Michele; Lorenzetti, Aldo; Bertuccelli, G; Sollano, J	In vitro protective effect of Celergen, a bioactive marine compound, on interleukin-6-related invasiveness of pancreatic cancer.	Acta bio-medica : Atenei Parmensis	85	44		2014	0392-4203
Rosa, Ines Correia; Pereira, Joana Luisa; Costa, Raquel; Gomes, Joao; Pereira, Maria de Lourdes; Goncalves, Fernando	Dispersal of Corbicula fluminea: factors influencing the invasive clam's drifting behavior	ANNALES DE LIMNOLOGIE-INTERNATIONAL JOURNAL OF LIMNOLOGY	50	37	10.1051/limn/2013069	2014	0003-4088
Alberio, Constanza; Comparatore, Viviana	Patterns of woody plant invasion in an Argentinean coastal grassland	ACTA OECOLOGICA-INTERNATIONAL JOURNAL OF ECOLOGY	54	65	10.1016/j.actao.2013.09.003	2014	1146-609X
Bunting, Denise; Coleman, Ross A.	Ethical consideration in invasion ecology: A marine perspective	Ecological Management & Restoration	15	64	10.1111/emr.12072	2014	1442-7001
Goldstein, Leah J.; Suding, Katharine N.	Applying competition theory to invasion: resource impacts indicate invasion mechanisms in California shrublands	BIOLOGICAL INVASIONS	16	191	10.1007/s10530-013-0513-0	2014	1387-3547
Collas, Frank P. L.; Koopman, K. Remon; Hendriks, A. Jan; van der Velde, Gerard; Verbrugge, Laura N. H.; Leuven, Rob S. E. W.	Effects of desiccation on native and non-native molluscs in rivers	FRESHWATER BIOLOGY	59	41	10.1111/fwb.12244	2014	0046-5070
Ferrari, Maud C. O.; Ranaker, Lynn; Weinersmith, Kelly L.; Young, Matthew J.; Sih, Andrew; Conrad, J. Louise	Effects of turbidity and an invasive waterweed on predation by introduced largemouth bass	ENVIRONMENTAL BIOLOGY OF FISHES	97	79	10.1007/s10641-013-0125-7	2014	0378-1909
Wilkie, Emma M.; Bishop, Melanie J.; O'Connor, Wayne A.	The density and spatial arrangement of the invasive oyster Crassostrea gigas determines its impact on settlement of native oyster larvae	ECOLOGY AND EVOLUTION	3	4851	10.1002/ece3.872	2013	2045-7758
Carvalho, Susana; Moura, Ana; Curdia, Joao; da Fonseca, Luis Cancela; Santos, Miguel N.	How complementary are epibenthic assemblages in artificial and nearby natural rocky reefs?	MARINE ENVIRONMENTAL RESEARCH	92	170	10.1016/j.marenvres.2013.09.013	2013	0141-1136
Magnoli, Susan M.; Kleinhesselink, Andrew R.; Cushman, J. Hall	Responses to invasion and invader removal differ between native and exotic plant groups in a coastal dune	OECOLOGIA	173	1521	10.1007/s00442-013-2725-5	2013	0029-8549
Azzurro, E.; La Mesa, G.; Fanelli, E.	The rocky-reef fish assemblages of Malta and Lampedusa islands (Strait of Sicily, Mediterranean Sea): a visual census study in a changing biogeographical sector	JOURNAL OF THE MARINE BIOLOGICAL ASSOCIATION OF THE UNITED KINGDOM	93	2015	10.1017/S0025315413000799	2013	0025-3154
Lanfranconi, Andrea; Brugnoli, Ernesto; Muniz, Pablo	Preliminary estimates of consumption rates of Rapana venosa (Gastropoda, Muricidae); a new threat to mollusk biodiversity in the Rio de la Plata	AQUATIC INVASIONS	8	437	10.3391/ai.2013.8.4.07	2013	1798-6540
Cuthbert, R. J.; Louw, H.; Parker, G.; Rexer-Huber, K.; Visser, P.	Observations of mice predation on dark-mantled sooty albatross and Atlantic yellow-nosed albatross chicks at Gough Island	ANTARCTIC SCIENCE	25	763	10.1017/S0954102013000126	2013	0954-1020
Kalogirou, S.	Ecological characteristics of the invasive pufferfish Lagocephalus sceleratus (Gmelin, 1789) in Rhodes, Eastern Mediterranean Sea. A case study	MEDITERRANEAN MARINE SCIENCE	14	251		2013	1108-393X
Munoz, Joaquin; Amat, Francisco; Green, Andy J.; Figuerola, Jordi; Gomez, Africa	Bird migratory flyways influence the phylogeography of the invasive brine shrimp Artemia franciscana in its native American range	PEERJ	1		10.7717/peerj.200	2013	2167-8359
Savaria, Michael C.; O'Connor, Nancy J.	Predation of the non-native Asian shore crab Hemigrapsus sanguineus by a native fish species, the cunner (Tautogolabrus adspersus)	JOURNAL OF EXPERIMENTAL MARINE BIOLOGY AND ECOLOGY	449	335	10.1016/j.jembe.2013.10.003	2013	0022-0981
Fraser, Elaine J.; Macdonald, David W.; Oliver, Matthew K.; Piertney, Stuart; Lambin, Xavier	Using population genetic structure of an invasive mammal to target control efforts - An example of the American mink in Scotland	BIOLOGICAL CONSERVATION	167	35	10.1016/j.biocon.2013.07.011	2013	0006-3207
Cerino, David; Overton, Anthony S.; Rice, James A.; Morris, James A., Jr.	Bioenergetics and Trophic Impacts of the Invasive Indo-Pacific Lionfish	TRANSACTIONS OF THE AMERICAN FISHERIES SOCIETY	142	1522	10.1080/00028487.2013.811098	2013	0002-8487
Knutie, Sarah A.; Koop, Jennifer A. H.; French, Susannah S.; Clayton, Dale H.	Experimental test of the effect of introduced hematophagous flies on corticosterone levels of breeding Darwin's finches	GENERAL AND COMPARATIVE ENDOCRINOLOGY	193	68	10.1016/j.ygcen.2013.07.009	2013	0016-6480
Carniatto, Natalia; Thomaz, Sidinei M.; Cunha, Eduardo R.; Fugi, Rosemara; Ota, Renata R.	Effects of an Invasive Alien Poaceae on Aquatic Macrophytes and Fish Communities in a Neotropical Reservoir	BIOTROPICA	45	747	10.1111/btp.12062	2013	0006-3606
Guo, Wen-Yong; Lambertini, Carla; Li, Xiu-Zhen; Meyerson, Laura A.; Brix, Hans	Invasion of Old World Phragmites australis in the New World: precipitation and temperature patterns combined with human influences redesign the invasive niche	GLOBAL CHANGE BIOLOGY	19	3406	10.1111/gcb.12295	2013	1354-1013
Salvaterra, Tania; Green, Dannielle S.; Crowe, Tasman P.; O'Gorman, Eoin J.	Impacts of the invasive alga Sargassum muticum on ecosystem functioning and food web structure	BIOLOGICAL INVASIONS	15	2563	10.1007/s10530-013-0473-4	2013	1387-3547
Albins, Mark A.; Hixon, Mark A.	Worst case scenario: potential long-term effects of invasive predatory lionfish (Pterois volitans) on Atlantic and Caribbean coral-reef communities	ENVIRONMENTAL BIOLOGY OF FISHES	96	1151	10.1007/s10641-011-9795-1	2013	0378-1909
Arias, Andres; Richter, Alexandra; Anadon, Nuria; Glasby, Christopher J.	Revealing polychaetes invasion patterns: Identification, reproduction and potential risks of the Korean ragworm, Perinereis linea (Treadwell), in the Western Mediterranean	ESTUARINE COASTAL AND SHELF SCIENCE	131	117	10.1016/j.ecss.2013.08.017	2013	0272-7714
Jessop, Tim S.; Letnic, Mike; Webb, Jonathan K.; Dempster, Tim	Adrenocortical stress responses influence an invasive vertebrate's fitness in an extreme environment	PROCEEDINGS OF THE ROYAL SOCIETY B-BIOLOGICAL SCIENCES	280		10.1098/rspb.2013.1444	2013	0962-8452
Hanson, Dieta; Cooke, Samantha; Hirano, Yayoi; Malaquias, Manuel A. E.; Crocetta, Fabio; Valdes, Angel	Slipping through the Cracks: The Taxonomic Impediment Conceals the Origin and Dispersal of Haminoea japonica, an Invasive Species with Impacts to Human Health	PLOS ONE	8		10.1371/journal.pone.0077457	2013	1932-6203
Mason, T. J.; French, K.; Jolley, D.	Arrival order among native plant functional groups does not affect invasibility of constructed dune communities	OECOLOGIA	173	557	10.1007/s00442-013-2628-5	2013	0029-8549
Siple, Margaret C.; Donahue, Megan J.	Invasive mangrove removal and recovery: Food web effects across a chronosequence	JOURNAL OF EXPERIMENTAL MARINE BIOLOGY AND ECOLOGY	448	128	10.1016/j.jembe.2013.06.008	2013	0022-0981
Bohn, Katrin; Richardson, Christopher A.; Jenkins, Stuart R.	Larval microhabitat associations of the non-native gastropod Crepidula fornicata and effects on recruitment success in the intertidal zone	JOURNAL OF EXPERIMENTAL MARINE BIOLOGY AND ECOLOGY	448	289	10.1016/j.jembe.2013.07.020	2013	0022-0981
Quintana, Cintia O.; Kristensen, Erik; Valdemarsen, Thomas	Impact of the invasive polychaete Marenzelleria viridis on the biogeochemistry of sandy marine sediments	BIOGEOCHEMISTRY	115	95	10.1007/s10533-012-9820-2	2013	0168-2563
Cortes-Calva, Patricia; Pablo Gallo-Reynoso, Juan; Delgadillo-Rodriguez, Jose; Lorenzo, Consuelo; Ticul Alvarez-Castaneda, Sergio	The Effect of Feral Dogs and Other Alien Species on Native Mammals of Isla de Cedros, Mexico	NATURAL AREAS JOURNAL	33	466	10.3375/043.033.0410	2013	0885-8608
Strain, Elisabeth M. A.; Johnson, Craig R.; Thomson, Russell J.	Effects of a Range-Expanding Sea Urchin on Behaviour of Commercially Fished Abalone	PLOS ONE	8		10.1371/journal.pone.0073477	2013	1932-6203
Anacleto, Patricia; Pedro, Sonia; Nunes, Maria Leonor; Rosa, Rui; Marques, Antonio	Microbiological composition of native and exotic clams from Tagus estuary: Effect of season and environmental parameters	MARINE POLLUTION BULLETIN	74	116	10.1016/j.marpolbul.2013.07.019	2013	0025-326X
Richkus, William A.; Menzie, Charles A.	Application of an Ecological Risk Assessment for Evaluation of Alternatives Considered for Restoration of Oysters in Chesapeake Bay: Background and Approach	HUMAN AND ECOLOGICAL RISK ASSESSMENT	19	1172	10.1080/10807039.2013.767092	2013	1080-7039
Menzie, Charles A.; Salatas, Johanna H.; Wickwire, Theodore	Ecological Risks Associated with Oyster Restoration Options for Chesapeake Bay	HUMAN AND ECOLOGICAL RISK ASSESSMENT	19	1204	10.1080/10807039.2013.767111	2013	1080-7039
Cacabelos, E.; Olabarria, C.; Viejo, R. M.; Rubal, M.; Veiga, P.; Incera, M.; Gestoso, I.; Vaz-Pinto, F.; Mejia, A.; Engelen, A. H.; Arenas, F.	Invasion of Sargassum muticum in intertidal rockpools: Patterns along the Atlantic Iberian Peninsula	MARINE ENVIRONMENTAL RESEARCH	90	18	10.1016/j.marenvres.2013.05.008	2013	0141-1136
Fasi, J.; Brodie, G.; Vanderwoude, C.	Increases in crop pests caused by Wasmannia auropunctata in Solomon Islands subsistence gardens	JOURNAL OF APPLIED ENTOMOLOGY	137	580	10.1111/jen.12033	2013	0931-2048
Coverdale, Tyler C.; Axelman, Eric E.; Brisson, Caitlin P.; Young, Eric W.; Altieri, Andrew H.; Bertness, Mark D.	New England Salt Marsh Recovery: Opportunistic Colonization of an Invasive Species and Its Non-Consumptive Effects	PLOS ONE	8		10.1371/journal.pone.0073823	2013	1932-6203
Cortes-Lacomba, Ricardo; Alvarez-Silva, Carlos; Gutierrez-Mendieta, Francisco	An updated list of the jellyfish from Laguna de Terminos, Campeche, Mexico	HIDROBIOLOGICA	23	209		2013	0188-8897
Irvine, Gail V.; Shelly, Alice	Sampling design for long-term regional trends in marine rocky intertidal communities	ENVIRONMENTAL MONITORING AND ASSESSMENT	185	6963	10.1007/s10661-013-3078-6	2013	0167-6369
Lu Qin-yan; Liu Yong; Li Chun-hou; Wei Xiao-lan; Liu Yong	Impacts of alien species invasion on the South China Sea ecosystem and related control strategies.	Shengtaixue Zazhi	32	2186		2013	1000-4890
Novoa, Ana; Gonzalez, Luis; Moravcova, Lenka; Pysek, Petr	Constraints to native plant species establishment in coastal dune communities invaded by Carpobrotus edulis: Implications for restoration	BIOLOGICAL CONSERVATION	164	1	10.1016/j.biocon.2013.04.008	2013	0006-3207
Cote, Isabelle M.; Green, Stephanie J.; Hixon, Mark A.	Predatory fish invaders: Insights from Indo-Pacific lionfish in the western Atlantic and Caribbean	BIOLOGICAL CONSERVATION	164	50	10.1016/j.biocon.2013.04.014	2013	0006-3207
Green, Dannielle S.; Rocha, Carlos; Crowe, Tasman P.	Effects of Non-indigenous Oysters on Ecosystem Processes Vary with Abundance and Context	ECOSYSTEMS	16	881	10.1007/s10021-013-9659-y	2013	1432-9840
O'Brien, John M.; Krumhansl, Kira A.; Scheibling, Robert E.	Invasive bryozoan alters interaction between a native grazer and its algal food	JOURNAL OF THE MARINE BIOLOGICAL ASSOCIATION OF THE UNITED KINGDOM	93	1393	10.1017/S0025315412001683	2013	0025-3154
Dibble, Kimberly L.; Pooler, Penelope S.; Meyerson, Laura A.	Impacts of plant invasions can be reversed through restoration: a regional meta-analysis of faunal communities	BIOLOGICAL INVASIONS	15	1725	10.1007/s10530-012-0404-9	2013	1387-3547
Freeman, Aaren S.; Wright, Jeffrey T.; Hewitt, Chad L.; Campbell, Marnie L.; Szeto, Kaylene	A gastropod's induced behavioral and morphological responses to invasive Carcinus maenas in Australia indicate a lack of novelty advantage	BIOLOGICAL INVASIONS	15	1795	10.1007/s10530-013-0409-z	2013	1387-3547
Vaz-Pinto, F.; Olabarria, C.; Gestoso, I.; Cacabelos, E.; Incera, M.; Arenas, F.	Functional diversity and climate change: effects on the invasibility of macroalgal assemblages	BIOLOGICAL INVASIONS	15	1833	10.1007/s10530-013-0412-4	2013	1387-3547
de Boer, Erik J.; Slaikovska, Marina; Hooghiemstra, Henry; Rijsdijk, Kenneth F.; Velez, Maria I.; Prins, Maarten; Baider, Claudia; Florens, F. B. Vincent	Multi-proxy reconstruction of environmental dynamics and colonization impacts in the Mauritian uplands	PALAEOGEOGRAPHY PALAEOCLIMATOLOGY PALAEOECOLOGY	383	42	10.1016/j.palaeo.2013.04.025	2013	0031-0182
Amaro, George; Fidelis de Morais, Elisangela Gomes	Potential geographical distribution of the red palm mite in South America	EXPERIMENTAL AND APPLIED ACAROLOGY	60	343	10.1007/s10493-012-9651-9	2013	0168-8162
Hoving, Henk-Jan T.; Gilly, William F.; Markaida, Unai; Benoit-Bird, Kelly J.; Brown, Zachary W.; Daniel, Patrick; Fieldk, John C.; Parassenti, Liz; Liu, Bilin; Campos, Bernardita	Extreme plasticity in life-history strategy allows a migratory predator (jumbo squid) to cope with a changing climate	GLOBAL CHANGE BIOLOGY	19	2089	10.1111/gcb.12198	2013	1354-1013
Tang, Long; Gao, Yang; Wang, Cheng-Huan; Li, Bo; Chen, Jia-Kuan; Zhao, Bin	Habitat heterogeneity influences restoration efficacy: Implications of a habitat-specific management regime for an invaded marsh	ESTUARINE COASTAL AND SHELF SCIENCE	125	20	10.1016/j.ecss.2013.03.013	2013	0272-7714
Bidegain, Gorka; Antonio Juanes, Jose	Does expansion of the introduced Manila clam Ruditapes philippinarum cause competitive displacement of the European native clam Ruditapes decussatus?	JOURNAL OF EXPERIMENTAL MARINE BIOLOGY AND ECOLOGY	445	44	10.1016/j.jembe.2013.04.005	2013	0022-0981
de Caralt, Sonia; Cebrian, Emma	Impact of an invasive alga (Womersleyella setacea) on sponge assemblages: compromising the viability of future populations	BIOLOGICAL INVASIONS	15	1591	10.1007/s10530-012-0394-7	2013	1387-3547
Zarnetske, Phoebe L.; Gouhier, Tarik C.; Hacker, Sally D.; Seabloom, Eric W.; Bokil, Vrushali A.	Indirect effects and facilitation among native and non-native species promote invasion success along an environmental stress gradient	JOURNAL OF ECOLOGY	101	905	10.1111/1365-2745.12093	2013	0022-0477
Urban-Malinga, Barbara; Warzocha, Jan; Zalewski, Mariusz	Effects of the invasive polychaete Marenzelleria spp. on benthic processes and meiobenthos of a species-poor brackish system	JOURNAL OF SEA RESEARCH	80	25	10.1016/j.seares.2013.02.005	2013	1385-1101
Murphy, James T.; Johnson, Mark P.; Walshe, Ray	MODELING THE IMPACT OF SPATIAL STRUCTURE ON GROWTH DYNAMICS OF INVASIVE PLANT SPECIES	INTERNATIONAL JOURNAL OF MODERN PHYSICS C	24		10.1142/S0129183113500423	2013	0129-1831
Tamburello, L.; Benedetti-Cecchi, L.; Masini, L.; Bulleri, F.	Habitat heterogeneity promotes the coexistence of exotic seaweeds	OECOLOGIA	172	505	10.1007/s00442-012-2510-x	2013	0029-8549
Thomsen, Mads S.; Staehr, Peter A.; Nejrup, Lars; Schiel, David R.	Effects of the invasive macroalgae Gracilaria vermiculophylla on two co-occurring foundation species and associated invertebrates	AQUATIC INVASIONS	8	133	10.3391/ai.2013.8.2.02	2013	1798-6540
Chan, Kayi; Bendell, L. I.	Potential effects of an invasive bivalve, Nuttallia obscurata: on select sediment attributes within the intertidal region of coastal British Columbia	JOURNAL OF EXPERIMENTAL MARINE BIOLOGY AND ECOLOGY	444	66	10.1016/j.jembe.2013.03.013	2013	0022-0981
Arias, A.; Giangrande, A.; Gambi, M. C.; Anadon, N.	Biology and new records of the invasive species Branchiomma bairdi (Annelida: Sabellidae) in the Mediterranean Sea	MEDITERRANEAN MARINE SCIENCE	14	162		2013	1108-393X
Gribben, Paul E.; Byers, James E.; Wright, Jeffrey T.; Glasby, Tim M.	Positive versus negative effects of an invasive ecosystem engineer on different components of a marine ecosystem	OIKOS	122	816	10.1111/j.1600-0706.2012.20868.x	2013	0030-1299
Needles, Lisa A.; Wendt, Dean E.	Big changes to a small bay: introduced species and long-term compositional shifts to the fouling community of Morro Bay (CA)	BIOLOGICAL INVASIONS	15	1231	10.1007/s10530-012-0362-2	2013	1387-3547
Cordell, Jeffery R.; Levy, Claire; Toft, Jason D.	Ecological implications of invasive tunicates associated with artificial structures in Puget Sound, Washington, USA	BIOLOGICAL INVASIONS	15	1303	10.1007/s10530-012-0366-y	2013	1387-3547
Strain, Elisabeth M. A.; Johnson, Craig R.	The effects of an invasive habitat modifier on the biotic interactions between two native herbivorous species and benthic habitat in a subtidal rocky reef ecosystem	BIOLOGICAL INVASIONS	15	1391	10.1007/s10530-012-0378-7	2013	1387-3547
Seebens, H.; Gastner, M. T.; Blasius, B.	The risk of marine bioinvasion caused by global shipping	ECOLOGY LETTERS	16	782	10.1111/ele.12111	2013	1461-023X
Pimiento, Catalina; Monaco, Eric; Barbour, Andrew B.; Silliman, Brian R.	PREDATION ON SPEARED RED LIONFISH, PTEROIS VOLITANS, BY SPOTTED MORAY, GYMNOTHORAX MORINGA	Florida Scientist	76	391		2013	0098-4590
Kriticos, Darren J.; Morin, Louise; Leriche, Agathe; Anderson, Robert C.; Caley, Peter	Combining a Climatic Niche Model of an Invasive Fungus with Its Host Species Distributions to Identify Risks to Natural Assets: Puccinia psidii Sensu Lato in Australia	PLOS ONE	8		10.1371/journal.pone.0064479	2013	1932-6203
Matishov, G. G.; Nabozhenko, M. V.; Shokhin, I. V.; Zolotareva, A. E.; Bulysheva, N. I.; Semin, V. L.; Polshin, V. V.; Povazhnyi, V. V.; Verbitskyi, R. E.; Verbitskyi, E. V.; Sapozhnikov, F. V.; Spiridonov, V. A.; Zalota, A. K.	Comprehensive studies in the Black Sea and the Sea of Azov in the Summer of 2012	OCEANOLOGY	53	374	10.1134/S0001437013030077	2013	0001-4370
Cielo Bazterrica, Maria; Fernanda Alvarez, Maria; Martin Bruschetti, Carlos; Jose Hidalgo, Fernando; Eugenia Fanjul, Maria; Iribarne, Oscar; Botto, Florencia	Factors controlling macroalgae assemblages in a Southwest Atlantic coastal lagoon modified by an invading reef forming polychaete	JOURNAL OF EXPERIMENTAL MARINE BIOLOGY AND ECOLOGY	443	169	10.1016/j.jembe.2013.02.036	2013	0022-0981
le Roux, Peter C.; Ramaswiela, Tshililo; Kalwij, Jesse M.; Shaw, Justine D.; Ryan, Peter G.; Treasure, Anne M.; McClelland, Gregory T. W.; McGeoch, Melodie A.; Chown, Steven L.	Human activities, propagule pressure and alien plants in the sub-Antarctic: Tests of generalities and evidence in support of management	BIOLOGICAL CONSERVATION	161	18	10.1016/j.biocon.2013.02.005	2013	0006-3207
Zimmermann, Emily W.; Purchase, Craig F.; Fleming, Ian A.; Brattey, John	Dispersal of wild and escapee farmed Atlantic cod (Gadus morhua) in Newfoundland	CANADIAN JOURNAL OF FISHERIES AND AQUATIC SCIENCES	70	747	10.1139/cjfas-2012-0428	2013	0706-652X
Gonzalez-Moreno, Pablo; Pino, Joan; Carreras, David; Basnou, Corina; Fernandez-Rebollar, Ivan; Vila, Montserrat	Quantifying the landscape influence on plant invasions in Mediterranean coastal habitats	LANDSCAPE ECOLOGY	28	891	10.1007/s10980-013-9857-1	2013	0921-2973
Greimler, Josef; Lopez-Sepulveda, Patricio; Reiter, Karl; Baeza, Carlos; Penailillo, Patricio; Ruiz, Eduardo; Novoa, Patricio; Gatica, Alejandro; Stuessy, Tod	Vegetation of Alejandro Selkirk Island (Isla Masafuera), Juan Fernandez Archipelago, Chile	PACIFIC SCIENCE	67	267	10.2984/67.2.9	2013	0030-8870
Steers, Robert J.; Fritzke, Susan L.; Rogers, Jen J.; Cartan, James; Hacker, Kaitlyn	Invasive Pine Tree Effects on Northern Coastal Scrub Structure and Composition	INVASIVE PLANT SCIENCE AND MANAGEMENT	6	231	10.1614/IPSM-D-12-00044.1	2013	1939-7291
Daniel Garcia-Rodriguez, Luis; Riosmena-Rodriguez, Rafael; Kim, Su Yeon; Lopez-Meyer, Melina; Orduna-Rojas, Javier; Manuel Lopez-Vivas, Juan; Boo, Sung Min	Recent introduction of Gracilaria parvispora (Gracilariales, Rhodophyta) in Baja California, Mexico	BOTANICA MARINA	56	143	10.1515/bot-2012-0177	2013	0006-8055
Large, Scott I.; Smee, Delbert L.	Biogeographic variation in behavioral and morphological responses to predation risk	OECOLOGIA	171	961	10.1007/s00442-012-2450-5	2013	0029-8549
Dijkstra, Jennifer A.; Lambert, Walter J.; Harris, Larry G.	Introduced species provide a novel temporal resource that facilitates native predator population growth	BIOLOGICAL INVASIONS	15	911	10.1007/s10530-012-0339-1	2013	1387-3547
Carmona-Galindo, Victor D.; Hinton-Hardin, Daryle; Kagihara, Jodi; Pascua, Mary Rose T.	Assessing the Impact of Invasive Species Management Strategies on the Population Dynamics of Castor bean (Ricinus communis L., Euphorbiaceae) at Two Southern California Coastal Habitats	NATURAL AREAS JOURNAL	33	222	10.3375/043.033.0212	2013	0885-8608
Kirk, Heather; Dorn, Silvia; Mazzi, Dominique	Worldwide population genetic structure of the oriental fruit moth (Grapholita molesta), a globally invasive pest	BMC ECOLOGY	13		10.1186/1472-6785-13-12	2013	1472-6785
Leeuw, Thomas; Newburg, Seth O.; Boss, Emmanuel S.; Slade, Wayne H.; Soroka, Michael G.; Pederson, Judith; Chryssostomidis, Chryssostomos; Hover, Franz S.	Remote identification of the invasive tunicate Didemnum vexillum using reflectance spectroscopy	APPLIED OPTICS	52	1758		2013	1559-128X
Lu, Jianbo; Zhang, Ying	Spatial distribution of an invasive plant Spartina alterniflora and its potential as biofuels in China	ECOLOGICAL ENGINEERING	52	175	10.1016/j.ecoleng.2012.12.107	2013	0925-8574
Steer, M. A.; Norton, D. A.	Factors influencing abundance of invasive hawkweeds, Hieracium species, in tall tussock grasslands in the Canterbury high country	NEW ZEALAND JOURNAL OF BOTANY	51	61	10.1080/0028825X.2012.753096	2013	0028-825X
Hasselquist, Eliza Maher; Hasselquist, Niles J.; Rogers, Deborah L.	Management of Non-Native Annual Plants to Support Recovery of an Endangered Perennial Forb, Ambrosia pumila	RESTORATION ECOLOGY	21	224	10.1111/j.1526-100X.2012.00883.x	2013	1061-2971
Chiba, Tomoki; Sato, Shin'ichi	Invasion of Laguncula pulchella (Gastropoda: Naticidae) and predator-prey interactions with bivalves on the Tona coast, Miyagi prefecture, northern Japan	BIOLOGICAL INVASIONS	15	587	10.1007/s10530-012-0310-1	2013	1387-3547
Gruber, M. A. M.; Burne, A. R.; Abbott, K. L.; Pierce, R. J.; Lester, P. J.	Population decline but increased distribution of an invasive ant genotype on a Pacific atoll	BIOLOGICAL INVASIONS	15	599	10.1007/s10530-012-0312-z	2013	1387-3547
Gaither, Michelle R.; Aeby, Greta; Vignon, Matthias; Meguro, Yu-ichiro; Rigby, Mark; Runyon, Christina; Toonen, Robert J.; Wood, Chelsea L.; Bowen, Brian W.	An Invasive Fish and the Time-Lagged Spread of Its Parasite across the Hawaiian Archipelago	PLOS ONE	8		10.1371/journal.pone.0056940	2013	1932-6203
Cockrell, Marcy L.; Sorte, Cascade J. B.	Predicting climate-induced changes in population dynamics of invasive species in a marine epibenthic community	JOURNAL OF EXPERIMENTAL MARINE BIOLOGY AND ECOLOGY	440	42	10.1016/j.jembe.2012.11.008	2013	0022-0981
Tejada, Silvia; Deudero, Salud; Box, Antonio; Sureda, Antoni	Physiological response of the sea urchin Paracentrotus lividus fed with the seagrass Posidonia oceanica and the alien algae Caulerpa racemosa and Lophocladia lallemandii	MARINE ENVIRONMENTAL RESEARCH	83	48	10.1016/j.marenvres.2012.10.008	2013	0141-1136
Palevsky, Eric; Gerson, Uri; Zhang, Zhi-Qiang	Can exotic phytoseiids be considered 'benevolent invaders' in perennial cropping systems?	EXPERIMENTAL AND APPLIED ACAROLOGY	59	11	10.1007/s10493-012-9575-4	2013	0168-8162
Cavallo, Bradley; Merz, Joseph; Setka, Jose	Effects of predator and flow manipulation on Chinook salmon (Oncorhynchus tshawytscha) survival in an imperiled estuary	ENVIRONMENTAL BIOLOGY OF FISHES	96	393	10.1007/s10641-012-9993-5	2013	0378-1909
Vazquez-Luis, Maite; Sanchez-Jerez, Pablo; Bayle-Sempere, Just T.	Does the invasion of Caulerpa racemosa var. cylindracea affect the feeding habits of amphipods (Crustacea: Amphipoda)?	JOURNAL OF THE MARINE BIOLOGICAL ASSOCIATION OF THE UNITED KINGDOM	93	87	10.1017/S0025315412000288	2013	0025-3154
Kulaksiz, Serkan; Bau, Michael	Anthropogenic dissolved and colloid/nanoparticle-bound samarium, lanthanum and gadolinium in the Rhine River and the impending destruction of the natural rare earth element distribution in rivers	EARTH AND PLANETARY SCIENCE LETTERS	362	43	10.1016/j.epsl.2012.11.033	2013	0012-821X
Safriel, Uriel N.	The Lessepsian invasion - a case study revisited	ISRAEL JOURNAL OF ECOLOGY & EVOLUTION	59	214	10.1080/15659801.2013.930994	2013	1565-9801
Guareschi, Simone; Coccia, Cristina; Sanchez-Fernandez, David; Antonio Carbonell, Jose; Velasco, Josefa; Boyero, Luz; Green, Andy J.; Millan, Andres	How Far Could the Alien Boatman Trichocorixa verticalis verticalis Spread? Worldwide Estimation of Its Current and Future Potential Distribution	PLOS ONE	8		10.1371/journal.pone.0059757	2013	1932-6203
Wasowicz, Pawel; Przedpelska-Wasowicz, Ewa Maria; Kristinsson, Horour	Alien vascular plants in Iceland: Diversity, spatial patterns, temporal trends, and the impact of climate change	FLORA	208	648	10.1016/j.flora.2013.09.009	2013	0367-2530
de Greef, K.; Griffiths, C. L.; Zeeman, Z.	Deja vu? A second mytilid mussel, Semimytilus algosus, invades South Africa's west coast	AFRICAN JOURNAL OF MARINE SCIENCE	35	307	10.2989/1814232X.2013.829789	2013	1814-232X
Arizaga, J.; Unamuno, E.; Clarabuch, O.; Azkona, A.	The impact of an invasive exotic bush on the stopover ecology of migrant passerines	ANIMAL BIODIVERSITY AND CONSERVATION	36	1		2013	1578-665X
Green, Dannielle S.; Crowe, Tasman P.	Physical and biological effects of introduced oysters on biodiversity in an intertidal boulder field	MARINE ECOLOGY PROGRESS SERIES	482	119	10.3354/meps10241	2013	0171-8630
Riul, Pablo; Targino, Carlos Henrique; Junior, Lelis A. C.; Creed, Joel C.; Horta, Paulo A.; Costa, Gabriel C.	Invasive potential of the coral Tubastraea coccinea in the southwest Atlantic	MARINE ECOLOGY PROGRESS SERIES	480	73	10.3354/meps10200	2013	0171-8630
Monty, M. L. Fabiola; Florens, F. B. Vincent; Baider, Claudia	Invasive alien plants elicit reduced production of flowers and fruits in various native forest species on the tropical island of Mauritius (Mascarenes, Indian Ocean)	TROPICAL CONSERVATION SCIENCE	6	35		2013	1940-0829
Babarro, Jose M. F.; Jose Abad, Maria	Co-existence of two mytilid species in a heterogeneous environment: mortality, growth and strength of shell and byssus attachment	MARINE ECOLOGY PROGRESS SERIES	476	115	10.3354/meps10122	2013	0171-8630
Miller, Nathan A.; Stillman, Jonathon H.	Seasonal and spatial variation in the energetics of the invasive clam Corbula amurensis in the upper San Francisco Estuary	MARINE ECOLOGY PROGRESS SERIES	476	129	10.3354/meps10149	2013	0171-8630
Irvine, Irina C.; Witter, Marti S.; Brigham, Christy A.; Martiny, Jennifer B. H.	Relationships between Methylobacteria and Glyphosate with Native and Invasive Plant Species: Implications for Restoration	RESTORATION ECOLOGY	21	105	10.1111/j.1526-100X.2011.00850.x	2013	1061-2971
Cote, Isabelle M.; Green, Stephanie J.; Morris, James A., Jr.; Akins, John L.; Steinke, Dirk	Diet richness of invasive Indo-Pacific lionfish revealed by DNA barcoding	MARINE ECOLOGY PROGRESS SERIES	472	249	10.3354/meps09992	2013	0171-8630
Edelist, Dor; Rilov, Gil; Golani, Daniel; Carlton, James T.; Spanier, Ehud	Restructuring the Sea: profound shifts in the world's most invaded marine ecosystem	DIVERSITY AND DISTRIBUTIONS	19	69	10.1111/ddi.12002	2013	1366-9516
Burfeind, Dana D.; Pitt, Kylie A.; Connolly, Rod M.; Byers, James E.	Performance of non-native species within marine reserves	BIOLOGICAL INVASIONS	15	17	10.1007/s10530-012-0265-2	2013	1387-3547
Albins, Mark A.	Effects of invasive Pacific red lionfish Pterois volitans versus a native predator on Bahamian coral-reef fish communities	BIOLOGICAL INVASIONS	15	29	10.1007/s10530-012-0266-1	2013	1387-3547
Hervias, S.; Henriques, A.; Oliveira, N.; Pipa, T.; Cowen, H.; Ramos, J. A.; Nogales, M.; Geraldes, P.; Silva, C.; Ruiz de Ybanez, R.; Oppel, S.	Studying the effects of multiple invasive mammals on Cory's shearwater nest survival	BIOLOGICAL INVASIONS	15	143	10.1007/s10530-012-0274-1	2013	1387-3547
Novoa, Ana; Gonzalez, Luis; Moravcova, Lenka; Pysek, Petr	Effects of Soil Characteristics, Allelopathy and Frugivory on Establishment of the Invasive Plant Carpobrotus edulis and a Co-Occuring Native, Malcolmia littorea	PLOS ONE	7		10.1371/journal.pone.0053166	2012	1932-6203
Tang, Long; Gao, Yang; Wang, Cheng-huan; Zhao, Bin; Li, Bo	A plant invader declines through its modification to habitats: A case study of a 16-year chronosequence of Spartina alterniflora invasion in a salt marsh	ECOLOGICAL ENGINEERING	49	181	10.1016/j.ecoleng.2012.08.024	2012	0925-8574
Diana, James S.	Is lower intensity aquaculture a valuable means of producing food? An evaluation of its effects on near-shore and inland waters	REVIEWS IN AQUACULTURE	4	234	10.1111/j.1753-5131.2012.01079.x	2012	1753-5123
Cebrian, Emma; Linares, Cristina; Marschal, Christian; Garrabou, Joaquim	Exploring the effects of invasive algae on the persistence of gorgonian populations	BIOLOGICAL INVASIONS	14	2647	10.1007/s10530-012-0261-6	2012	1387-3547
Morris-Pocock, James A.; Hennicke, Janos C.; Friesen, Vicki L.	Effects of long-term isolation on genetic variation and within-island population genetic structure in Christmas Island (Indian Ocean) seabirds	CONSERVATION GENETICS	13	1469	10.1007/s10592-012-0390-6	2012	1566-0621
Lucas, Lisa V.; Thompson, Janet K.	Changing restoration rules: Exotic bivalves interact with residence time and depth to control phytoplankton productivity	ECOSPHERE	3		10.1890/ES12-00251.1	2012	2150-8925
Mattingly, W. Brett; Orrock, John L.; Reif, Nicholas T.	Dendroecological analysis reveals long-term, positive effects of an introduced understory plant on canopy tree growth	BIOLOGICAL INVASIONS	14	2639	10.1007/s10530-012-0259-0	2012	1387-3547
Jezorek, Heather; Baker, Amanda J.; Stiling, Peter	Effects of Cactoblastis cactorum on the survival and growth of North American Opuntia	BIOLOGICAL INVASIONS	14	2355	10.1007/s10530-012-0234-9	2012	1387-3547
De Silva, Sena S.	Aquaculture: a newly emergent food production sector-and perspectives of its impacts on biodiversity and conservation	BIODIVERSITY AND CONSERVATION	21	3187	10.1007/s10531-012-0360-9	2012	0960-3115
Wei, Fan; Gong, Yiming; Yang, Hao	Biogeography, ecology and extinction of Silurian and Devonian tentaculitoids	PALAEOGEOGRAPHY PALAEOCLIMATOLOGY PALAEOECOLOGY	358	40	10.1016/j.palaeo.2012.07.019	2012	0031-0182
Luis Renteria, Jorge; Gardener, Mark R.; Panetta, F. Dane; Atkinson, Rachel; Crawley, Mick J.	Possible Impacts of the Invasive Plant Rubus niveus on the Native Vegetation of the Scalesia Forest in the Galapagos Islands	PLOS ONE	7		10.1371/journal.pone.0048106	2012	1932-6203
Green, Dannielle S.; Boots, Bas; Crowe, Tasman P.	Effects of Non-Indigenous Oysters on Microbial Diversity and Ecosystem Functioning	PLOS ONE	7		10.1371/journal.pone.0048410	2012	1932-6203
Meek, Mariah H.; Wintzer, Alpa P.; Wetzel, William C.; May, Bernie	Climate Change Likely to Facilitate the Invasion of the Non-Native Hydroid, Cordylophora caspia, in the San Francisco Estuary	PLOS ONE	7		10.1371/journal.pone.0046373	2012	1932-6203
Willette, Demian A.; Ambrose, Richard F.	Effects of the invasive seagrass Halophila stipulacea on the native seagrass, Syringodium filiforme, and associated fish and epibiota communities in the Eastern Caribbean	AQUATIC BOTANY	103	74	10.1016/j.aquabot.2012.06.007	2012	0304-3770
Ruell, E. W.; Riley, S. P. D.; Douglas, M. R.; Antolin, M. F.; Pollinger, J. R.; Tracey, J. A.; Lyren, L. M.; Boydston, E. E.; Fisher, R. N.; Crooks, K. R.	Urban Habitat Fragmentation and Genetic Population Structure of Bobcats in Coastal Southern California	AMERICAN MIDLAND NATURALIST	168	265		2012	0003-0031
French, K.	Competition strength of two significant invasive species in coastal dunes	PLANT ECOLOGY	213	1667	10.1007/s11258-012-0122-5	2012	1385-0237
Wanless, R. M.; Ratcliffe, N.; Angel, A.; Bowie, B. C.; Cita, K.; Hilton, G. M.; Kritzinger, P.; Ryan, P. G.; Slabber, M.	Predation of Atlantic Petrel chicks by house mice on Gough Island	ANIMAL CONSERVATION	15	472	10.1111/j.1469-1795.2012.00534.x	2012	1367-9430
Purcell, K. M.; Ling, N.; Stockwell, C. A.	Evaluation of the introduction history and genetic diversity of a serially introduced fish population in New Zealand	BIOLOGICAL INVASIONS	14	2057	10.1007/s10530-012-0213-1	2012	1387-3547
Ranjith, L.; Shukla, S. P.; Vennila, A.; Gashaw, T. D.	Bioinvasion in Antarctic Ecosystems	PROCEEDINGS OF THE NATIONAL ACADEMY OF SCIENCES INDIA SECTION B-BIOLOGICAL SCIENCES	82	353	10.1007/s40011-012-0054-9	2012	0369-8211
Etchegoin, J. A.; Merlo, M. J.; Parietti, M.	The role of the invasive polychaete Ficopomatus enigmaticus (Fauvel, 1923) (Serpulidae) as facilitator of parasite transmission in Mar Chiquita coastal lagoon (Buenos Aires, Argentina)	PARASITOLOGY	139	1506	10.1017/S0031182012000820	2012	0031-1820
Tang Yijie; Fang Zhanqiang; Chen Kang; Zhang Zaiwang; Zhong Yanting; An Dong; Yang Xiongbang; Liao Baowen	Ecological influence of exotic plants of Sonneratia apetala on understory macrofauna	ACTA OCEANOLOGICA SINICA	31	115	10.1007/s13131-012-0242-8	2012	0253-505X
Smith, Craig R.; DeMaster, David J.; Thomas, Carrie; Srsen, Pavica; Grange, Laura; Evrard, Victor; DeLeo, Fabio	PELAGIC-BENTHIC COUPLING, FOOD BANKS, AND CLIMATE CHANGE ON THE WEST ANTARCTIC PENINSULA SHELF	OCEANOGRAPHY	25	188		2012	1042-8275
Wong, Melisa C.; Vercaemer, Benedikte	Effects of invasive colonial tunicates and a native sponge on the growth, survival, and light attenuation of eelgrass (Zostera marina)	AQUATIC INVASIONS	7	315	10.3391/ai.2012.7.3.003	2012	1798-6540
Park, Sun Young; Kim, Young Hun; Kim, Younghee; Lee, Sang-Joon	Frondoside A has an anti-invasive effect by inhibiting TPA-induced MMP-9 activation via NF-kappa B and AP-1 signaling in human breast cancer cells	INTERNATIONAL JOURNAL OF ONCOLOGY	41	933	10.3892/ijo.2012.1518	2012	1019-6439
Rodriguez-Echeverria, Susana; Fajardo, Susana; Ruiz-Diez, Beatriz; Fernandez-Pascual, Mercedes	Differential effectiveness of novel and old legume-rhizobia mutualisms: implications for invasion by exotic legumes	OECOLOGIA	170	253	10.1007/s00442-012-2299-7	2012	0029-8549
Senan, Ali S.; Tomasetto, Federico; Farcomeni, Alessio; Somashekar, Rayasamuda K.; Attorre, Fabio	Determinants of plant species invasions in an arid island: evidence from Socotra Island (Yemen)	PLANT ECOLOGY	213	1381	10.1007/s11258-012-0098-1	2012	1385-0237
Wardle, David A.; Bellingham, Peter J.; Fukami, Tadashi; Bonner, Karen I.	Soil-mediated indirect impacts of an invasive predator on plant growth	BIOLOGY LETTERS	8	574	10.1098/rsbl.2012.0201	2012	1744-9561
Mercer, Jessica; Kelman, Ilan; Alfthan, Bjorn; Kurvits, Tiina	Ecosystem-Based Adaptation to Climate Change in Caribbean Small Island Developing States: Integrating Local and External Knowledge	SUSTAINABILITY	4	1908	10.3390/su4081908	2012	2071-1050
Swei, Andrea; Briggs, Cheryl J.; Lane, Robert S.; Ostfeld, Richard S.	Impacts of an Introduced Forest Pathogen on the Risk of Lyme Disease in California	VECTOR-BORNE AND ZOONOTIC DISEASES	12	623	10.1089/vbz.2011.0783	2012	1530-3667
McKenzie, Louise A.; Brooks, Robert C.; Johnston, Emma L.	A widespread contaminant enhances invasion success of a marine invader	JOURNAL OF APPLIED ECOLOGY	49	767	10.1111/j.1365-2664.2012.02158.x	2012	0021-8901
Mason, Tanya J.; French, Kristine; Russell, Ken	Are competitive effects of native species on an invader mediated by water availability?	JOURNAL OF VEGETATION SCIENCE	23	657	10.1111/j.1654-1103.2012.01393.x	2012	1100-9233
Diaz, Stephanie; Smith, Jayson R.; Zaleski, Susan F.; Murray, Steven N.	Effectiveness of the California State Ban on the Sale of Caulerpa Species in Aquarium Retail Stores in Southern California	ENVIRONMENTAL MANAGEMENT	50	89	10.1007/s00267-012-9860-3	2012	0364-152X
Milko, Laura V.	Integrating Museum and GIS Data to Identify Changes in Species Distributions Driven by a Disturbance-Induced Invasion	COPEIA		307	10.1643/CE-10-159	2012	0045-8511
Bonnici, L.; Evans, J.; Borg, J. A.; Schembri, P. J.	Biological aspects and ecological effects of a bed of the invasive non-indigenous mussel Brachidontes pharaonis (Fischer P., 1870) in Malta	MEDITERRANEAN MARINE SCIENCE	13	153		2012	1108-393X
Wilkie, Emma M.; Bishop, Melanie J.; O'Connor, Wayne A.	Are native Saccostrea glomerata and invasive Crassostrea gigas oysters' habitat equivalents for epibenthic communities in south-eastern Australia?	JOURNAL OF EXPERIMENTAL MARINE BIOLOGY AND ECOLOGY	420	16	10.1016/j.jembe.2012.03.018	2012	0022-0981
Boets, Pieter; Lock, Koen; Goethals, Peter L. M.	Assessing the importance of alien macro-Crustacea (Malacostraca) within macroinvertebrate assemblages in Belgian coastal harbours	HELGOLAND MARINE RESEARCH	66	175	10.1007/s10152-011-0259-y	2012	1438-387X
Connor, Simon E.; van Leeuwen, Jacqueline F. N.; Rittenour, Tammy M.; van der Knaap, Willem O.; Ammann, Brigitta; Bjorck, Svante	The ecological impact of oceanic island colonization - a palaeoecological perspective from the Azores	JOURNAL OF BIOGEOGRAPHY	39	1007	10.1111/j.1365-2699.2011.02671.x	2012	0305-0270
Estelle, Veronica; Grosholz, Edwin D.	Experimental Test of the Effects of a Non-Native Invasive Species on a Wintering Shorebird	CONSERVATION BIOLOGY	26	472	10.1111/j.1523-1739.2011.01820.x	2012	0888-8892
Mejia-Mojica, Humberto; de Jesus Rodriguez-Romero, Felipe; Diaz-Pardo, Edmundo	Historical presence of invasive fish in the Biosphere Reserve Sierra de Huautla, Mexico.	REVISTA DE BIOLOGIA TROPICAL	60	669		2012	0034-7744
Derbel, H.; Chaari, M.; Neifar, L.	DIGENEAN SPECIES DIVERSITY IN TELEOST FISHES FROM THE GULF OF GABES, TUNISIA (WESTERN MEDITERRANEAN)	PARASITE-JOURNAL DE LA SOCIETE FRANCAISE DE PARASITOLOGIE	19	129		2012	1252-607X
Sato, Shin'ichi; Chiba, Tomoki; Hasegawa, Hiromi	Long-term fluctuations in mollusk populations before and after the appearance of the alien predator Euspira fortunei on the Tona coast, Miyagi Prefecture, northern Japan	FISHERIES SCIENCE	78	589	10.1007/s12562-012-0491-7	2012	0919-9268
Graham, Sean P.; Freidenfelds, Nicole A.; McCormick, Gail L.; Langkilde, Tracy	The impacts of invaders: Basal and acute stress glucocorticoid profiles and immune function in native lizards threatened by invasive ants	GENERAL AND COMPARATIVE ENDOCRINOLOGY	176	400	10.1016/j.ygcen.2011.12.027	2012	0016-6480
Grason, Emily W.; Miner, Benjamin G.	Behavioral plasticity in an invaded system: non-native whelks recognize risk from native crabs	OECOLOGIA	169	105	10.1007/s00442-011-2188-5	2012	0029-8549
Selmants, Paul C.; Zavaleta, Erika S.; Pasari, Jae R.; Hernandez, Daniel L.	Realistic plant species losses reduce invasion resistance in a California serpentine grassland	JOURNAL OF ECOLOGY	100	723	10.1111/j.1365-2745.2011.01949.x	2012	0022-0477
Duffy, David Cameron; Capece, Paula	Biology and Impacts of Pacific Island Invasive Species. 7. The Domestic Cat (Felis catus)	PACIFIC SCIENCE	66	173	10.2984/66.2.7	2012	0030-8870
Hata, Kenji; Kato, Hidetoshi; Kachi, Naoki	Seedlings of a native shrub can establish under forests dominated by an alien tree, Casuarina equisetifolia, on subtropical oceanic islands	JOURNAL OF FOREST RESEARCH	17	208	10.1007/s10310-011-0279-0	2012	1341-6979
Cielo Bazterrica, Maria; Botto, Florencia; Iribarne, Oscar	Effects of an invasive reef-building polychaete on the biomass and composition of estuarine macroalgal assemblages	BIOLOGICAL INVASIONS	14	765	10.1007/s10530-011-0115-7	2012	1387-3547
Liang, X.; Zheng, H.; He, C. Q.; Xu, Q. Y.; Zhan, Y. W.; Lei, Y. R.; Du, W.; Yang, J. N.	Allelopathic effects of invasive Spartina alterniflora root exudates in soil on the offspring (seeds) of Scirpus mariqueter	ALLELOPATHY JOURNAL	29	251		2012	0971-4693
Wang, Hsiao-Hsuan; Grant, William E.; Gan, Jianbang; Rogers, William E.; Swannack, Todd M.; Koralewski, Tomasz E.; Miller, James H.; Taylor, John W.	Integrating Spread Dynamics and Economics of Timber Production to Manage Chinese Tallow Invasions in Southern US Forestlands	PLOS ONE	7		10.1371/journal.pone.0033877	2012	1932-6203
Smith, Craig R.; Grange, Laura J.; Honig, David L.; Naudts, Lieven; Huber, Bruce; Guidi, Lionel; Domack, Eugene	A large population of king crabs in Palmer Deep on the west Antarctic Peninsula shelf and potential invasive impacts	PROCEEDINGS OF THE ROYAL SOCIETY B-BIOLOGICAL SCIENCES	279	1017	10.1098/rspb.2011.1496	2012	0962-8452
Comeau, Luc Andre; Sonier, Remi; Hanson, John Mark	Seasonal movements of Atlantic rock crab (Cancer irroratus Say) transplanted into a mussel aquaculture site	AQUACULTURE RESEARCH	43	509	10.1111/j.1365-2109.2011.02856.x	2012	1355-557X
Wu, Zhongxing; Zeng, Bo; Li, Renhiu; Song, Lirong	Combined effects of carbon and phosphorus levels on the invasive cyanobacterium, Cylindrospermopsis raciborskii	PHYCOLOGIA	51	144	10.2216/10-87.1	2012	0031-8884
Khanna, Shruti; Santos, Maria J.; Hestir, Erin L.; Ustin, Susan L.	Plant community dynamics relative to the changing distribution of a highly invasive species, Eichhornia crassipes: a remote sensing perspective	BIOLOGICAL INVASIONS	14	717	10.1007/s10530-011-0112-x	2012	1387-3547
Gao, Jianhua; Bai, Fenglong; Yang, Yang; Gao, Shu; Liu, Zhiyong; Li, Jun	Influence of Spartina Colonization on the Supply and Accumulation of Organic Carbon in Tidal Salt Marshes of Northern Jiangsu Province, China	JOURNAL OF COASTAL RESEARCH	28	486	10.2112/JCOASTRES-D-11-00062.1	2012	0749-0208
Bird, Peter; Mutze, Greg; Peacock, David; Jennings, Scott	Damage caused by low-density exotic herbivore populations: the impact of introduced European rabbits on marsupial herbivores and Allocasuarina and Bursaria seedling survival in Australian coastal shrubland	BIOLOGICAL INVASIONS	14	743	10.1007/s10530-011-0114-8	2012	1387-3547
Lejart, Morgane; Clavier, Jacques; Chauvaud, Laurent; Hily, Christian	Respiration and Calcification of Crassostrea gigas: Contribution of an Intertidal Invasive Species to Coastal Ecosystem CO2 Fluxes	ESTUARIES AND COASTS	35	622	10.1007/s12237-011-9462-y	2012	1559-2723
Krkosek, Martin; Connors, Brendan M.; Lewis, Mark A.; Poulin, Robert	Allee Effects May Slow the Spread of Parasites in a Coastal Marine Ecosystem	AMERICAN NATURALIST	179	401	10.1086/664458	2012	0003-0147
Janiak, Dean S.; Whitlatch, Robert B.	Epifaunal and algal assemblages associated with the native Chondrus crispus (Stackhouse) and the non-native Grateloupia turuturu (Yamada) in eastern Long Island Sound	JOURNAL OF EXPERIMENTAL MARINE BIOLOGY AND ECOLOGY	413	38	10.1016/j.jembe.2011.11.016	2012	0022-0981
Heinonen, Kari B.; Auster, Peter J.	Prey selection in crustacean-eating fishes following the invasion of the Asian shore crab Hemigrapsus sanguineus in a marine temperate community	JOURNAL OF EXPERIMENTAL MARINE BIOLOGY AND ECOLOGY	413	177	10.1016/j.jembe.2011.12.011	2012	0022-0981
Drouin, Annick; McKindsey, Christopher W.; Johnson, Ladd E.	Detecting the impacts of notorious invaders: experiments versus observations in the invasion of eelgrass meadows by the green seaweed Codium fragile	OECOLOGIA	168	491	10.1007/s00442-011-2086-x	2012	0029-8549
Vranjic, J. A.; Morin, L.; Reid, A. M.; Groves, R. H.	Integrating revegetation with management methods to rehabilitate coastal vegetation invaded by Bitou bush (Chrysanthemoides monilifera ssp rotundata) in Australia	AUSTRAL ECOLOGY	37	78	10.1111/j.1442-9993.2011.02242.x	2012	1442-9985
Norkko, Joanna; Reed, Daniel C.; Timmermann, Karen; Norkko, Alf; Gustafsson, Bo G.; Bonsdorff, Erik; Slomp, Caroline P.; Carstensen, Jacob; Conley, Daniel J.	A welcome can of worms? Hypoxia mitigation by an invasive species	GLOBAL CHANGE BIOLOGY	18	422	10.1111/j.1365-2486.2011.02513.x	2012	1354-1013
Cseke, Leland J.; Talley, Sharon M.	A PCR-based Genotyping Method to Distinguish Between Wild-type and Ornamental Varieties of Imperata cylindrica	JOVE-JOURNAL OF VISUALIZED EXPERIMENTS			10.3791/3265	2012	1940-087X
Pantaleoni, Roberto A.; Cesaroni, Carlo; Cossu, C. Simone; Deliperi, Salvatore; Fadda, Leonarda; Fois, Xenia; Lentini, Andrea; Loi, Achille; Loru, Laura; Molinu, Alessandro; Nuvoli, M. Tiziana; Ramassini, Wilson; Sassu, Antonio; Serra, Giuseppe; Verdinelli, Marcello	Impact of alien insect pests on Sardinian landscape and culture	Biodiversity Journal	3	297		2012	2039-0394
Martin, Charles W.; Bayha, Keith M.; Valentine, John F.	Establishment of the Invasive Island Apple Snail Pomacea insularum (Gastropoda: Ampullaridae) and Eradication Efforts in Mobile, Alabama, USA	Gulf of Mexico Science	30	30		2012	1087-688X
Langhamer, Olivia	Artificial Reef Effect in relation to Offshore Renewable Energy Conversion: State of the Art	SCIENTIFIC WORLD JOURNAL			10.1100/2012/386713	2012	1537-744X
Chuseve, Romualda; Mastitsky, Sergey E.; Zaiko, Anastazja	First report of endosymbionts in Dreissena polymorpha from the brackish Curonian Lagoon, SE Baltic Sea	OCEANOLOGIA	54	701	10.5697/oc.54-4.701	2012	0078-3234
Bastida-Zavala, Rolando; Garcia-Madrigal, Socorro	First record in the Tropical Eastern Pacific of the exotic species Ficopomatus uschakovi (Polychaeta, Serpulidae)	ZOOKEYS		45	10.3897/zookeys.238.3970	2012	1313-2989
Frazer, Thomas K.; Jacoby, Charles A.; Edwards, Morgan A.; Barry, Savanna C.; Manfrino, Carrie M.	Coping with the Lionfish Invasion: Can Targeted Removals Yield Beneficial Effects?	REVIEWS IN FISHERIES SCIENCE	20	185	10.1080/10641262.2012.700655	2012	1064-1262
Cinar, Melih Ertan; Katagan, Tuncer; Ozturk, Bilal; Dagli, Ertan; Acik, Sermin; Bitlis, Banu; Bakir, Kerem; Dogan, Alper	Spatio-temporal distributions of zoobenthos in Mersin Bay (Levantine Sea, eastern Mediterranean) and the importance of alien species in benthic communities	MARINE BIOLOGY RESEARCH	8	954	10.1080/17451000.2012.706305	2012	1745-1000
Cutajar, Justin; Shimeta, Jeff; Nugegoda, Dayanthi	Impacts of the invasive grass Spartina anglica on benthic macrofaunal assemblages in a temperate Australian saltmarsh	MARINE ECOLOGY PROGRESS SERIES	464	107	10.3354/meps09826	2012	0171-8630
Baird, Dan; Asmus, Harald; Asmus, Ragnhild	Effect of invasive species on the structure and function of the Sylt-Romo Bight ecosystem, northern Wadden Sea, over three time periods	MARINE ECOLOGY PROGRESS SERIES	462	143	10.3354/meps09837	2012	0171-8630
Gestoso, Ignacio; Olabarria, Celia; Arenas, Francisco	The invasive mussel Xenostrobus securis along the Galician Rias Baixas (NW of Spain): status of invasion	CAHIERS DE BIOLOGIE MARINE	53	391		2012	0007-9723
Klein, Judith C.; Verlaque, Marc	Temporal trends in invasion impacts in macrophyte assemblages of the Mediterranean Sea	CAHIERS DE BIOLOGIE MARINE	53	403		2012	0007-9723
Lakkis, Sami	Introduction of Indo-Pacific and Eritrean species into Lebanese seawaters (Levantine Basin, East Mediterranean)	CAHIERS DE BIOLOGIE MARINE	53	381		2012	0007-9723
Krumhansl, Kira A.; Scheibling, Robert E.	Detrital subsidy from subtidal kelp beds is altered by the invasive green alga Codium fragile ssp fragile	MARINE ECOLOGY PROGRESS SERIES	456	73	10.3354/meps09671	2012	0171-8630
Hedge, Luke H.; Johnston, Emma L.	Propagule pressure determines recruitment from a commercial shipping pier	BIOFOULING	28	73	10.1080/08927014.2011.652622	2012	0892-7014
MacKenzie, Richard Ames; Bruland, Gregory L.	Nekton Communities in Hawaiian Coastal Wetlands: The Distribution and Abundance of Introduced Fish Species	ESTUARIES AND COASTS	35	212	10.1007/s12237-011-9427-1	2012	1559-2723
Gallucci, Fabiane; Hutchings, Pat; Gribben, Paul; Fonseca, Gustavo	Habitat alteration and community-level effects of an invasive ecosystem engineer: a case study along the coast of NSW, Australia	MARINE ECOLOGY PROGRESS SERIES	449	95	10.3354/meps09547	2012	0171-8630
Swope, Sarah M.; Satterthwaite, William H.	Variable effects of a generalist parasitoid on a biocontrol seed predator and its target weed	ECOLOGICAL APPLICATIONS	22	20		2012	1051-0761
Repetto, Michele; Griffen, Blaine D.	Physiological consequences of parasite infection in the burrowing mud shrimp, Upogebia pugettensis, a widespread ecosystem engineer	MARINE AND FRESHWATER RESEARCH	63	60	10.1071/MF11158	2012	1323-1650
Hontoria, Francisco; Redon, Stela; Maccari, Marta; Varo, Inmaculada; Navarro, Juan Carlos; Ballell, Lluis; Amat, Francisco	A revision of Artemia biodiversity in Macaronesia.	Aquatic biosystems	8	25	10.1186/2046-9063-8-25	2012
Hwan, Youn Dae; Choi, Chanhun; 김왕인; 나창수	Effects of Low Level Laser Treatment at LR2 and LR8 acupoint on the liver damage induced in D-GalN in rats	Korean Journal of Acupuncture	29	131		2012	2287-3368
Langhamer, Olivia	Artificial reef effect in relation to offshore renewable energy conversion: state of the art.	TheScientificWorldJournal	2012	386713	10.1100/2012/386713	2012
Cecere, E.; Alabiso, G.; Portacci, G.; Petrocelli, A.	The effect of climate change on Alien macroalgae: the case of the Piccolo Sea of Taranto	Informatore Botanico Italiano	43	157		2011	0020-0697
Bat, Levent; Sezgin, Murat; Satilmis, Hasan H.; Sahin, Fatih; Ustun, Funda; Birinci-Ozdemir, Zekiye; Baki, Oylum Gokkurt	Biological Diversity of the Turkish Black Sea Coast	TURKISH JOURNAL OF FISHERIES AND AQUATIC SCIENCES	11	683	10.4194/1303-2712-v11_4_04	2011	1303-2712
Band-Schmidt, Christine J.; Bustillos-Guzman, Jose J.; Lopez-Cortes, David J.; Nunez-Vazquez, Erick; Hernandez-Sandoval, Francisco E.	The actual state of the study of harmful algal blooms in Mexico	HIDROBIOLOGICA	21	381		2011	0188-8897
Rossi, Francesca; Incera, Monica; Callier, Myriam; Olabarria, Celia	Effects of detrital non-native and native macroalgae on the nitrogen and carbon cycling in intertidal sediments	MARINE BIOLOGY	158	2705	10.1007/s00227-011-1768-6	2011	0025-3162
Olenin, Sergej; Elliott, Michael; Bysveen, Ingrid; Culverhouse, Phil F.; Daunys, Darius; Dubelaar, George B. J.; Gollasch, Stephan; Goulletquer, Philippe; Jelmert, Anders; Kantor, Yuri; Mezeth, Kjersti Bringsvor; Minchin, Dan; Occhipinti-Ambrogi, Anna; Olenina, Irina; Vandekerkhove, Jochen	Recommendations on methods for the detection and control of biological pollution in marine coastal waters	MARINE POLLUTION BULLETIN	62	2598	10.1016/j.marpolbul.2011.08.011	2011	0025-326X
Cinar, M. E.; Bilecenoglu, M.; Ozturk, B.; Katagan, T.; Yokes, M. B.; Aysel, V.; Dagli, E.; Acik, S.; Ozcan, T.; Erdogan, H.	An updated review of alien species on the coasts of Turkey	MEDITERRANEAN MARINE SCIENCE	12	257		2011	1108-393X
Schaber, Matthias; Haslob, Holger; Huwer, Bastian; Harjes, Anne; Hinrichsen, Hans-Harald; Storr-Paulsen, Marie; Schmidt, Joern O.; Voss, Ruediger; Neumann, Viola; Koster, Friedrich W.	Spatio-temporal overlap of the alien invasive ctenophore Mnemiopsis leidyi and ichthyoplankton in the Bornholm Basin (Baltic Sea)	BIOLOGICAL INVASIONS	13	2647	10.1007/s10530-011-9936-7	2011	1387-3547
Delaney, David G.; Griffen, Blaine D.; Leung, Brian	Does consumer injury modify invasion impact?	BIOLOGICAL INVASIONS	13	2935	10.1007/s10530-011-9975-0	2011	1387-3547
Halim, Y.; Rizkalla, S.	Aliens in Egyptian Mediterranean waters. A check-list of Erythrean fish with new records	MEDITERRANEAN MARINE SCIENCE	12	479		2011	1108-393X
Slattery, M.; Lesser, M. P.; Brazeau, D.; Stokes, M. D.; Leichter, J. J.	Connectivity and stability of mesophotic coral reefs	JOURNAL OF EXPERIMENTAL MARINE BIOLOGY AND ECOLOGY	408	32	10.1016/j.jembe.2011.07.024	2011	0022-0981
Faggi, Ana; Dadon, Jose	Temporal and spatial changes in plant dune diversity in urban resorts	JOURNAL OF COASTAL CONSERVATION	15	585	10.1007/s11852-011-0148-1	2011	1400-0350
Krumhansl, Kira A.; Lee, J. Michael; Scheibling, Robert E.	Grazing damage and encrustation by an invasive bryozoan reduce the ability of kelps to withstand breakage by waves	JOURNAL OF EXPERIMENTAL MARINE BIOLOGY AND ECOLOGY	407	12	10.1016/j.jembe.2011.06.033	2011	0022-0981
Moehler, Jenny; Wegner, K. Mathias; Reise, Karsten; Jacobsen, Sabine	Invasion genetics of Pacific oyster Crassostrea gigas shaped by aquaculture stocking practices	JOURNAL OF SEA RESEARCH	66	256	10.1016/j.seares.2011.08.004	2011	1385-1101
Sahlin, Ullrika; Ryden, Tobias; Nyberg, Cecilia D.; Smith, Henrik G.	A benefit analysis of screening for invasive species - base-rate uncertainty and the value of information	METHODS IN ECOLOGY AND EVOLUTION	2	500	10.1111/j.2041-210X.2011.00097.x	2011	2041-210X
Tong, Chuan; Zhang, Linhai; Wang, Weiqi; Gauci, Vincent; Marrs, Rob; Liu, Baigui; Jia, Ruixia; Zeng, Congsheng	Contrasting nutrient stocks and litter decomposition in stands of native and invasive species in a sub-tropical estuarine marsh	ENVIRONMENTAL RESEARCH	111	909	10.1016/j.envres.2011.05.023	2011	0013-9351
Ernesto Arias-Gonzalez, Jesus; Gonzalez-Gandara, Carlos; Luis Cabrera, Jose; Christensen, Villy	Predicted impact of the invasive lionfish Pterois volitans on the food web of a Caribbean coral reef	ENVIRONMENTAL RESEARCH	111	917	10.1016/j.envres.2011.07.008	2011	0013-9351
Ojaveer, Henn; Kotta, Jonne; Pollumaee, Arno; Pollupueue, Maria; Jaanus, Andres; Vetemaa, Markus	Alien species in a brackish water temperate ecosystem: Annual-scale dynamics in response to environmental variability	ENVIRONMENTAL RESEARCH	111	933	10.1016/j.envres.2011.03.002	2011	0013-9351
Zuljevic, Ante; Thibaut, Thierry; Despalatovic, Marija; Cottalorda, Jean-Michel; Nikolic, Vedran; Cvitkovic, Ivan; Antolic, Boris	Invasive alga Caulerpa racemosa var. cylindracea makes a strong impact on the Mediterranean sponge Sarcotragus spinosulus	BIOLOGICAL INVASIONS	13	2303	10.1007/s10530-011-0043-6	2011	1387-3547
Cox, Robert D.; Allen, Edith B.	The roles of exotic grasses and forbs when restoring native species to highly invaded southern California annual grassland	PLANT ECOLOGY	212	1699	10.1007/s11258-011-9942-y	2011	1385-0237
Perrier, Charles; Guyomard, Rene; Bagliniere, Jean-Luc; Evanno, Guillaume	Determinants of hierarchical genetic structure in Atlantic salmon populations: environmental factors vs. anthropogenic influences	MOLECULAR ECOLOGY	20	4231	10.1111/j.1365-294X.2011.05266.x	2011	0962-1083
Eschweiler, Nina; Buschbaum, Christian	Alien epibiont (Crassostrea gigas) impacts on native periwinkles (Littorina littorea)	AQUATIC INVASIONS	6	281	10.3391/ai.2011.6.3.05	2011	1798-6540
Dauvin, Jean-Claude; Dufosse, Fabien	Hemigrapsus sanguineus (De Haan, 1835) (Crustacea: Brachyura: Grapsoidea) a new invasive species in European waters: the case of the French English Channel coast (2008-2010)	AQUATIC INVASIONS	6	329	10.3391/ai.2011.6.3.09	2011	1798-6540
Austin, Christopher C.; Rittmeyer, Eric N.; Oliver, Lauren A.; Andermann, John O.; Zug, George R.; Rodda, Gordon H.; Jackson, Nathan D.	The bioinvasion of Guam: inferring geographic origin, pace, pattern and process of an invasive lizard (Carlia) in the Pacific using multi-locus genomic data	BIOLOGICAL INVASIONS	13	1951	10.1007/s10530-011-0014-y	2011	1387-3547
Lercari, Diego; Bergamino, Leandro	Impacts of two invasive mollusks, Rapana venosa (Gastropoda) and Corbicula fluminea (Bivalvia), on the food web structure of the Rio de la Plata estuary and nearshore oceanic ecosystem	BIOLOGICAL INVASIONS	13	2053	10.1007/s10530-011-0023-x	2011	1387-3547
Le Roux, Johannes J.; Brown, Gillian K.; Byrne, Margaret; Ndlovu, Joice; Richardson, David M.; Thompson, Genevieve D.; Wilson, John R. U.	Phylogeographic consequences of different introduction histories of invasive Australian Acacia species and Paraserianthes lophantha (Fabaceae) in South Africa	DIVERSITY AND DISTRIBUTIONS	17	861	10.1111/j.1472-4642.2011.00784.x	2011	1366-9516
Malyshev, Andrey; Quijon, Pedro A.	Disruption of essential habitat by a coastal invader: new evidence of the effects of green crabs on eelgrass beds	ICES JOURNAL OF MARINE SCIENCE	68	1852	10.1093/icesjms/fsr126	2011	1054-3139
Oug, Eivind; Cochrane, Sabine K. J.; Sundet, Jan H.; Norling, Karl; Nilsson, Hans C.	Effects of the invasive red king crab (Paralithodes camtschaticus) on soft-bottom fauna in Varangerfjorden, northern Norway	Marine Biodiversity	41	467	10.1007/s12526-010-0068-6	2011	1867-1616
Brenneis, Valance E. F.; Sih, Andrew; de Rivera, Catherine E.	Integration of an invasive consumer into an estuarine food web: direct and indirect effects of the New Zealand mud snail	OECOLOGIA	167	169	10.1007/s00442-011-1962-8	2011	0029-8549
Green, Peter T.; O'Dowd, Dennis J.; Abbott, Kirsti L.; Jeffery, Mick; Retallick, Kent; Mac Nally, Ralph	Invasional meltdown: Invader-invader mutualism facilitates a secondary invasion	ECOLOGY	92	1758		2011	0012-9658
Lorenti, Maurizio; Gambi, Maria Cristina; Guglielmo, Rosanna; Patti, Francesco Paolo; Scipione, Maria Beatrice; Zupo, Valerio; Buia, Maria Cristina	Soft-bottom macrofaunal assemblages in the Gulf of Salerno, Tyrrhenian Sea, Italy, an area affected by the invasion of the seaweed Caulerpa racemosa var. cylindracea	MARINE ECOLOGY-AN EVOLUTIONARY PERSPECTIVE	32	320	10.1111/j.1439-0485.2011.00472.x	2011	0173-9565
Britton, J. R.; Gozlan, Rodolphe E.; Copp, Gordon H.	Managing non-native fish in the environment	FISH AND FISHERIES	12	256	10.1111/j.1467-2979.2010.00390.x	2011	1467-2960
White, Laura F.; Shurin, Jonathan B.	Density dependent effects of an exotic marine macroalga on native community diversity	JOURNAL OF EXPERIMENTAL MARINE BIOLOGY AND ECOLOGY	405	111	10.1016/j.jembe.2011.05.024	2011	0022-0981
Pett, Walker; Ryan, Joseph F.; Pang, Kevin; Mullikin, James C.; Martindale, Mark Q.; Baxevanis, Andreas D.; Lavrov, Dennis V.	Extreme mitochondrial evolution in the ctenophore Mnemiopsis leidyi: Insight from mtDNA and the nuclear genome	MITOCHONDRIAL DNA	22	130	10.3109/19401736.2011.624611	2011	1940-1736
Gregory, Garry J.; Quijon, Pedro A.	The impact of a coastal invasive predator on infaunal communities: Assessing the roles of density and a native counterpart	JOURNAL OF SEA RESEARCH	66	181	10.1016/j.seares.2011.05.009	2011	1385-1101
Kingsley-Smith, Peter; Knott, David; Bergyuist, Derk	UPDATES ON THE STATUS OF INVASIVE AND NON-INDIGENOUS SPECIES WITH IMPACTS FOR SHELLFISH COMMUNITIES IN SOUTH CAROLINA, USA	JOURNAL OF SHELLFISH RESEARCH	30	521		2011	0730-8000
Zaiko, Anastasija; Lehtiniemi, Maiju; Narscius, Aleksas; Olenin, Sergej	Assessment of bioinvasion impacts on a regional scale: a comparative approach	BIOLOGICAL INVASIONS	13	1739	10.1007/s10530-010-9928-z	2011	1387-3547
Lesser, Michael P.; Slattery, Marc	Phase shift to algal dominated communities at mesophotic depths associated with lionfish (Pterois volitans) invasion on a Bahamian coral reef	BIOLOGICAL INVASIONS	13	1855	10.1007/s10530-011-0005-z	2011	1387-3547
Karlson, Agnes M. L.; Naslund, Johan; Ryden, Sara Blomgren; Elmgren, Ragnar	Polychaete invader enhances resource utilization in a species-poor system	OECOLOGIA	166	1055	10.1007/s00442-011-1936-x	2011	0029-8549
Innis, Anne F.; Forseth, Irwin N.; Whigham, Dennis F.; McCormick, Melissa K.	Genetic diversity in the invasive Rubus phoenicolasius as compared to the native Rubus argutus using inter-simple sequence repeat (ISSR) markers	BIOLOGICAL INVASIONS	13	1735	10.1007/s10530-011-0012-0	2011	1387-3547
Ma, J. W.; Geng, S. L.; Wang, S. B.; Zhang, G. L.; Fu, W. D.; Shu, B.	Genetic diversity of the newly invasive weed Flaveria bidentis (Asteraceae) reveals consequences of its rapid range expansion in northern China	WEED RESEARCH	51	363	10.1111/j.1365-3180.2011.00856.x	2011	0043-1737
Babarro, Jose M. F.; Lassudrie, Malwenn	Ecophysiological responses of invasive and indigenous mytilids in the Ria de Vigo (NW Spain)	AQUATIC LIVING RESOURCES	24	303	10.1051/alr/2011142	2011	0990-7440
Araujo, Rita; Violante, Jose; Pereira, Rui; Abreu, Helena; Arenas, Francisco; Sousa-Pinto, Isabel	Distribution and population dynamics of the introduced seaweed Grateloupia turuturu (Halymeniaceae, Rhodophyta) along the Portuguese coast	PHYCOLOGIA	50	392	10.2216/10-65.1	2011	0031-8884
Tyler, Carrie L.; Leighton, Lindsey R.	Detecting competition in the fossil record: Support for character displacement among Ordovician brachiopods	PALAEOGEOGRAPHY PALAEOCLIMATOLOGY PALAEOECOLOGY	307	205	10.1016/j.palaeo.2011.05.020	2011	0031-0182
Bruschetti, Martin; Bazterrica, Cielo; Fanjul, Eugenia; Luppi, Tomas; Iribarne, Oscar	Effect of biodeposition of an invasive polychaete on organic matter content and productivity of the sediment in a coastal lagoon	JOURNAL OF SEA RESEARCH	66	20	10.1016/j.seares.2011.04.007	2011	1385-1101
Terauds, Aleks; Chown, Steven L.; Bergstrom, Dana M.	Spatial scale and species identity influence the indigenous-alien diversity relationship in springtails	ECOLOGY	92	1436		2011	0012-9658
Bennett, Alison E.; Thomsen, Meredith; Strauss, Sharon Y.	MULTIPLE MECHANISMS ENABLE INVASIVE SPECIES TO SUPPRESS NATIVE SPECIES	AMERICAN JOURNAL OF BOTANY	98	1086	10.3732/ajb.1000177	2011	0002-9122
Paetzold, S Christine; Davidson, Jeff	Aquaculture fouling: Efficacy of potassium monopersulphonate triple salt based disinfectant (Virkon Aquatic) against Ciona intestinalis.	Biofouling	27	655	10.1080/08927014.2011.594503	2011
Irigoyen, Alejo J.; Trobbiani, Gaston; Sgarlatta, Maria P.; Raffo, Maria P.	Effects of the alien algae Undaria pinnatifida (Phaeophyceae, Laminariales) on the diversity and abundance of benthic macrofauna in Golfo Nuevo (Patagonia, Argentina): potential implications for local food webs	BIOLOGICAL INVASIONS	13	1521	10.1007/s10530-010-9910-9	2011	1387-3547
Tomas, Fiona; Box, Antonio; Terrados, Jorge	Effects of invasive seaweeds on feeding preference and performance of a keystone Mediterranean herbivore	BIOLOGICAL INVASIONS	13	1559	10.1007/s10530-010-9913-6	2011	1387-3547
Winder, Monika; Jassby, Alan D.	Shifts in Zooplankton Community Structure: Implications for Food Web Processes in the Upper San Francisco Estuary	ESTUARIES AND COASTS	34	675	10.1007/s12237-010-9342-x	2011	1559-2723
Ma, Zhijun; Gan, Xiaojing; Cai, Yinting; Chen, Jiakuan; Li, Bo	Effects of exotic Spartina alterniflora on the habitat patch associations of breeding saltmarsh birds at Chongming Dongtan in the Yangtze River estuary, China	BIOLOGICAL INVASIONS	13	1673	10.1007/s10530-010-9924-3	2011	1387-3547
Deudero, S.; Box, A.; Alos, J.; Arroyo, N. L.; Marba, N.	Functional changes due to invasive species: Food web shifts at shallow Posidonia oceanica seagrass beds colonized by the alien macroalga Caulerpa racemosa	ESTUARINE COASTAL AND SHELF SCIENCE	93	106	10.1016/j.ecss.2011.03.017	2011	0272-7714
Haley, C. N.; Blamey, L. K.; Atkinson, L. J.; Branch, G. M.	Dietary change of the rock lobster Jasus lalandii after an 'invasive' geographic shift: Effects of size, density and food availability	ESTUARINE COASTAL AND SHELF SCIENCE	93	160	10.1016/j.ecss.2011.04.015	2011	0272-7714
Cebrian, Emma; Ballesteros, Enric; Linares, Cristina; Tomas, Fiona	Do native herbivores provide resistance to Mediterranean marine bioinvasions? A seaweed example	BIOLOGICAL INVASIONS	13	1397	10.1007/s10530-010-9898-1	2011	1387-3547
Damgaard, Christian; Nygaard, Bettina; Ejrnaes, Rasmus; Kollmann, Johannes	State-Space Modeling Indicates Rapid Invasion of an Alien Shrub in Coastal Dunes	JOURNAL OF COASTAL RESEARCH	27	595	10.2112/JCOASTRES-D-09-00132.1	2011	0749-0208
Queiros, Ana de Moura; Hiddink, Jan Geert; Johnson, Gareth; Cabral, Henrique Nogueira; Kaiser, Michel Joseph	Context dependence of marine ecosystem engineer invasion impacts on benthic ecosystem functioning	BIOLOGICAL INVASIONS	13	1059	10.1007/s10530-011-9948-3	2011	1387-3547
Fulford, Richard S.; Breitburg, Denise L.; Luckenbach, Mark	Differences in Relative Predation Vulnerability Between Native and Non-native Oyster Larvae and the Influence on Restoration Planning in an Estuarine Ecosystem	ESTUARIES AND COASTS	34	618	10.1007/s12237-010-9360-8	2011	1559-2723
Thomsen, Mads S.; Wernberg, Thomas; Olden, Julian D.; Griffin, John N.; Silliman, Brian R.	A framework to study the context-dependent impacts of marine invasions	JOURNAL OF EXPERIMENTAL MARINE BIOLOGY AND ECOLOGY	400	322	10.1016/j.jembe.2011.02.033	2011	0022-0981
Grosholz, Edwin; Lovell, Sabrina; Besedin, Elena; Katz, Marilyn	Modeling the impacts of the European green crab on commercial shellfisheries	ECOLOGICAL APPLICATIONS	21	915	10.1890/09-1657.1	2011	1051-0761
Incera, Monica; Olabarria, Celia; Cacabelos, Eva; Cesar, Javier; Troncoso, Jesus S.	Distribution of Sargassum muticum on the North West coast of Spain: Relationships with urbanization and community diversity	CONTINENTAL SHELF RESEARCH	31	488	10.1016/j.csr.2010.06.005	2011	0278-4343
Hoffle, H.; Thomsen, M. S.; Holmer, M.	High mortality of Zostera marina under high temperature regimes but minor effects of the invasive macroalgae Gracilaria vermiculophylla	ESTUARINE COASTAL AND SHELF SCIENCE	92	35	10.1016/j.ecss.2010.12.017	2011	0272-7714
Kostecki, C.; Rochette, S.; Girardin, R.; Blanchard, M.; Desroy, N.; Le Pape, O.	Reduction of flatfish habitat as a consequence of the proliferation of an invasive mollusc	ESTUARINE COASTAL AND SHELF SCIENCE	92	154	10.1016/j.ecss.2010.12.026	2011	0272-7714
Provoost, Sam; Jones, M. Laurence M.; Edmondson, Sally E.	Changes in landscape and vegetation of coastal dunes in northwest Europe: a review	JOURNAL OF COASTAL CONSERVATION	15	207	10.1007/s11852-009-0068-5	2011	1400-0350
Schirmel, Jens	Response of the grasshopper Myrmeleotettix maculatus (Orthoptera: Acrididae) to invasion by the exotic moss Campylopus introflexus in acidic coastal dunes	JOURNAL OF COASTAL CONSERVATION	15	159	10.1007/s11852-010-0129-9	2011	1400-0350
Bragg, Don C.; Shelton, Michael G.	Lessons from 72 years of monitoring a once-cut pine-hardwood stand on the Crossett Experimental Forest, Arkansas, USA	FOREST ECOLOGY AND MANAGEMENT	261	911	10.1016/j.foreco.2009.12.021	2011	0378-1127
Podda, L.; Fraga i Arguimbau, P.; Mascia, F.; Mayoral Garcia-Berlanga, O.; Bacchetta, G.	Comparison of the invasive alien flora in continental islands: Sardinia (Italy) and Balearic Islands (Spain)	RENDICONTI LINCEI-SCIENZE FISICHE E NATURALI	22	31	10.1007/s12210-010-0112-2	2011	2037-4631
Schirmel, Jens; Timler, Lars; Buchholz, Sascha	Impact of the invasive moss Campylopus introflexus on carabid beetles (Coleoptera: Carabidae) and spiders (Araneae) in acidic coastal dunes at the southern Baltic Sea	BIOLOGICAL INVASIONS	13	605	10.1007/s10530-010-9852-2	2011	1387-3547
Martin, Charles W.; Valentine, John F.	Impacts of a Habitat-Forming Exotic Species on Estuarine Structure and Function: An Experimental Assessment of Eurasian Milfoil	ESTUARIES AND COASTS	34	364	10.1007/s12237-010-9274-5	2011	1559-2723
Luo, Meifeng; Opaluch, James J.	Analyze the risks of biological invasion	STOCHASTIC ENVIRONMENTAL RESEARCH AND RISK ASSESSMENT	25	377	10.1007/s00477-010-0375-2	2011	1436-3240
Corbin, Jeffrey D.; D'Antonio, Carla M.	Abundance and productivity mediate invader effects on nitrogen dynamics in a California grassland	ECOSPHERE	2		10.1890/ES10-00113.1	2011	2150-8925
Falk-Petersen, Jannike; Renaud, Paul; Anisimova, Natalia	Establishment and ecosystem effects of the alien invasive red king crab (Paralithodes camtschaticus) in the Barents Sea-a review	ICES JOURNAL OF MARINE SCIENCE	68	479	10.1093/icesjms/fsq192	2011	1054-3139
Shao, Xue-xin; Yang, Wen-ying; Wu, Ming; Jiang, Ke-yi	[Soil organic carbon content and its distribution pattern in Hangzhou Bay coastal wetlands].	Ying yong sheng tai xue bao = The journal of applied ecology / Zhongguo sheng tai xue xue hui, Zhongguo ke xue yuan Shenyang ying yong sheng tai yan jiu suo zhu ban	22	658		2011	1001-9332
Infantes, Eduardo; Terrados, Jorge; Orfila, Alejandro	Assessment of substratum effect on the distribution of two invasive Caulerpa (Chlorophyta) species	ESTUARINE COASTAL AND SHELF SCIENCE	91	434	10.1016/j.ecss.2010.11.005	2011	0272-7714
Madrigal, Jaime; Kelt, Douglas A.; Meserve, Peter L.; Gutierrez, Julio R.; Squeo, Francisco A.	Bottom-up control of consumers leads to top-down indirect facilitation of invasive annual herbs in semiarid Chile	ECOLOGY	92	282		2011	0012-9658
Britton-Simmons, Kevin H.; Pister, Benjamin; Sanchez, Inigo; Okamoto, Daniel	Response of a native, herbivorous snail to the introduced seaweed Sargassum muticum	HYDROBIOLOGIA	661	187	10.1007/s10750-010-0523-1	2011	0018-8158
Stern, N.; Goren, M.; Yokes, B. M.; Galil, B. S.; Diamant, A.	The impact of invasive species on the soft-bottom fish communities in the eastern Mediterranean	ISRAEL JOURNAL OF ECOLOGY & EVOLUTION	57	268		2011	1565-9801
Burkitt, James; Wootton, Louise	Effects of Disturbance and Age of Invasion on the Impact of the Invasive Sand Sedge, Carex kobomugi, on Native Dune Plant Populations in New Jersey's Coastal Dunes	JOURNAL OF COASTAL RESEARCH	27	182	10.2112/JCOASTRES-D-10-00108.1	2011	0749-0208
Lages, B. G.; Fleury, B. G.; Menegola, C.; Creed, J. C.	Change in tropical rocky shore communities due to an alien coral invasion	MARINE ECOLOGY PROGRESS SERIES	438	85	10.3354/meps09290	2011	0171-8630
	In the Wrong Place - Alien Marine Crustaceans: Distribution, Biology and Impacts	In the Wrong Place - Alien Marine Crustaceans: Distribution, Biology and Impacts	6			2011	1874-7809(print)
Brockerhoff, Annette; McLay, Colin	Human-Mediated Spread of Alien Crabs	In the Wrong Place - Alien Marine Crustaceans: Distribution, Biology and Impacts	6	27	10.1007/978-94-007-0591-3_2	2011	1874-7809(print)
Boos, Karin; Ashton, Gail V.; Cook, Elizabeth J.	The Japanese Skeleton Shrimp Caprella mutica (Crustacea, Amphipoda): A Global Invader of Coastal Waters	In the Wrong Place - Alien Marine Crustaceans: Distribution, Biology and Impacts	6	129	10.1007/978-94-007-0591-3_4	2011	1874-7809(print)
Carlton, James T.; Newman, William A.; Pitombo, Fabio Bettini	Barnacle Invasions: Introduced, Cryptogenic, and Range Expanding Cirripedia of North and South America	In the Wrong Place - Alien Marine Crustaceans: Distribution, Biology and Impacts	6	159	10.1007/978-94-007-0591-3_5	2011	1874-7809(print)
Ruiz, Gregory; Fofonoff, Paul; Steves, Brian; Dahlstrom, Alisha	Marine Crustacean Invasions in North America: A Synthesis of Historical Records and Documented Impacts	In the Wrong Place - Alien Marine Crustaceans: Distribution, Biology and Impacts	6	215	10.1007/978-94-007-0591-3_6	2011	1874-7809(print)
Tavares, Marcos	Alien Decapod Crustaceans in the Southwestern Atlantic Ocean	In the Wrong Place - Alien Marine Crustaceans: Distribution, Biology and Impacts	6	251	10.1007/978-94-007-0591-3_7	2011	1874-7809(print)
Jazdzewski, Krzysztof; Grabowski, Michal	Alien Crustaceans Along the Southern and Western Baltic Sea	In the Wrong Place - Alien Marine Crustaceans: Distribution, Biology and Impacts	6	323	10.1007/978-94-007-0591-3_11	2011	1874-7809(print)
Noel, Pierre Y.	Checklist of Cryptogenic and Alien Crustacea of the European Atlantic Coast	In the Wrong Place - Alien Marine Crustaceans: Distribution, Biology and Impacts	6	345	10.1007/978-94-007-0591-3_12	2011	1874-7809(print)
Galil, Bella S.	The Alien Crustaceans in the Mediterranean Sea: An Historical Review	In the Wrong Place - Alien Marine Crustaceans: Distribution, Biology and Impacts	6	377	10.1007/978-94-007-0591-3_13	2011	1874-7809(print)
Yeo, Darren C. J.; Carlton, James T.; Teo, Serena L. M.; Ng, Peter K. L.	An Incoming Flood on a Cryptic Stage: Understanding Alien Crustacean Invasions in Southeast Asia	In the Wrong Place - Alien Marine Crustaceans: Distribution, Biology and Impacts	6	403	10.1007/978-94-007-0591-3_14	2011	1874-7809(print)
Doi, Wataru; Watanabe, Seiichi; Carlton, James T.	Alien Marine Crustaceans of Japan: A Preliminary Assessment	In the Wrong Place - Alien Marine Crustaceans: Distribution, Biology and Impacts	6	419	10.1007/978-94-007-0591-3_15	2011	1874-7809(print)
Ahyong, Shane T.; Wilkens, Serena L.	Aliens in the Antipodes: Non-indigenous Marine Crustaceans of New Zealand and Australia	In the Wrong Place - Alien Marine Crustaceans: Distribution, Biology and Impacts	6	451	10.1007/978-94-007-0591-3_16	2011	1874-7809(print)
Jorgensen, Lis Lindal; Nilssen, Einar M.	The Invasive History, Impact and Management of the Red King Crab Paralithodes camtschaticus off the Coast of Norway	In the Wrong Place - Alien Marine Crustaceans: Distribution, Biology and Impacts	6	521	10.1007/978-94-007-0591-3_18	2011	1874-7809(print)
Innocenti, Gianna; Galil, Bella S.	Live and Let Live: Invasive Host, Charybdis longicollis (Decapoda: Brachyura: Portunidae), and Invasive Parasite, Heterosaccus dollfusi (Cirripedia: Rhizocephala: Sacculinidae)	In the Wrong Place - Alien Marine Crustaceans: Distribution, Biology and Impacts	6	583	10.1007/978-94-007-0591-3_20	2011	1874-7809(print)
Jorstad, Knut Eirik; Agnalt, Ann-Lisbeth; Farestveit, Eva	The Introduced American Lobster, Homarus americanus in Scandinavian Waters	In the Wrong Place - Alien Marine Crustaceans: Distribution, Biology and Impacts	6	625	10.1007/978-94-007-0591-3_22	2011	1874-7809(print)
Darling, John A.	More than One Way to Invade: Lessons from Genetic Studies of Carcinus Shore Crabs	In the Wrong Place - Alien Marine Crustaceans: Distribution, Biology and Impacts	6	661	10.1007/978-94-007-0591-3_24	2011	1874-7809(print)
Griffen, Blaine D.	Ecological Impacts of Replacing One Invasive Species with Another in Rocky Intertidal Areas	In the Wrong Place - Alien Marine Crustaceans: Distribution, Biology and Impacts	6	687	10.1007/978-94-007-0591-3_25	2011	1874-7809(print)
Munoz, Roldan C.; Currin, Carolyn A.; Whitfield, Paula E.	Diet of invasive lionfish on hard bottom reefs of the Southeast USA: insights from stomach contents and stable isotopes	MARINE ECOLOGY PROGRESS SERIES	432	181	10.3354/meps09154	2011	0171-8630
Greene, Valerie E.; Sullivan, Lindsay J.; Thompson, Janet K.; Kimmerer, Wim J.	Grazing impact of the invasive clam Corbula amurensis on the microplankton assemblage of the northern San Francisco Estuary	MARINE ECOLOGY PROGRESS SERIES	431	183	10.3354/meps09099	2011	0171-8630
Fong, Peggy; Paul, Valerie J.	Coral Reef Algae	Coral Reefs: An Ecosystem in Transition		241	10.1007/978-94-007-0114-4_17	2011
Hellmann, Christine; Sutter, Rabea; Rascher, Katherine G.; Maguas, Cristina; Correia, Otilia; Werner, Christiane	Impact of an exotic N-2-fixing Acacia on composition and N status of a native Mediterranean community	ACTA OECOLOGICA-INTERNATIONAL JOURNAL OF ECOLOGY	37	43	10.1016/j.actao.2010.11.005	2011	1146-609X
Jud, Zachary R.; Layman, Craig A.; Lee, Jessica A.; Arrington, D. Albrey	Recent invasion of a Florida (USA) estuarine system by lionfish Pterois volitans/P. miles	AQUATIC BIOLOGY	13	21	10.3354/ab00351	2011	1864-7790
Terlizzi, Antonio; Felline, Serena; Lionetto, Maria Giulia; Caricato, Roberto; Perfetti, Vincenzo; Cutignano, Adele; Mollo, Ernesto	Detrimental physiological effects of the invasive alga Caulerpa racemosa on the Mediterranean white seabream Diplodus sargus	AQUATIC BIOLOGY	12	109	10.3354/ab00330	2011	1864-7790
Crooks, Jeffrey A.; Chang, Andrew L.; Ruiz, Gregory M.	Aquatic pollution increases the relative success of invasive species	BIOLOGICAL INVASIONS	13	165	10.1007/s10530-010-9799-3	2011	1387-3547
Occhipinti-Ambrogi, Anna; Marchini, Agnese; Cantone, Grazia; Castelli, Alberto; Chimenz, Carla; Cormaci, Mario; Froglia, Carlo; Furnari, Giovanni; Gambi, Maria Cristina; Giaccone, Giuseppe; Giangrande, Adriana; Gravili, Cinzia; Mastrototaro, Francesco; Mazziotti, Cristina; Orsi-Relini, Lidia; Piraino, Stefano	Alien species along the Italian coasts: an overview	BIOLOGICAL INVASIONS	13	215	10.1007/s10530-010-9803-y	2011	1387-3547
Oyarzun, Carlos E.; Frene, Cristian; Lacrampe, Gustavo; Huber, Anton; Herve, Pedro	Soil hydrological properties and sediment transport in two headwater catchments with different vegetative cover at the Coastal Mountain Range in southern Chile	BOSQUE	32	10	10.4067/S0717-92002011000100002	2011	0717-9200
Yelenik, Stephanie G.; Levine, Jonathan M.	The role of plant-soil feedbacks in driving native-species recovery	ECOLOGY	92	66	10.1890/10-0465.1	2011	0012-9658
Carlton, James T.	The Global Dispersal of Marine and Estuarine Crustaceans	In the Wrong Place - Alien Marine Crustaceans: Distribution, Biology and Impacts	6	3	10.1007/978-94-007-0591-3_1	2011	1874-7809(print)
Griffiths, Charles; Robinson, Tamara; Mead, Angela	The Alien and Cryptogenic Marine Crustaceans of South Africa	In the Wrong Place - Alien Marine Crustaceans: Distribution, Biology and Impacts	6	269	10.1007/978-94-007-0591-3_8	2011	1874-7809(print)
Agnalt, Ann-Lisbeth; Pavlov, Valery; Jorstad, Knut Eirik; Farestveit, Eva; Sundet, Jan	The Snow Crab, Chionoecetes opilio (Decapoda, Majoidea, Oregoniidae) in the Barents Sea	In the Wrong Place - Alien Marine Crustaceans: Distribution, Biology and Impacts	6	283	10.1007/978-94-007-0591-3_9	2011	1874-7809(print)
Berezina, Nadezhda A.; Petryashev, Victor V.; Razinkovas, Arturas; Lesutiene, Jurate	Alien Malacostracan Crustaceans in the Eastern Baltic Sea: Pathways and Consequences	In the Wrong Place - Alien Marine Crustaceans: Distribution, Biology and Impacts	6	301	10.1007/978-94-007-0591-3_10	2011	1874-7809(print)
Nehring, Stefan	Invasion History and Success of the American Blue Crab Callinectes sapidus in European and Adjacent Waters	In the Wrong Place - Alien Marine Crustaceans: Distribution, Biology and Impacts	6	607	10.1007/978-94-007-0591-3_21	2011	1874-7809(print)
Edgell, Timothy C.; Hollander, Johan	The Evolutionary Ecology of European Green Crab, Carcinus maenas, in North America	In the Wrong Place - Alien Marine Crustaceans: Distribution, Biology and Impacts	6	641	10.1007/978-94-007-0591-3_23	2011	1874-7809(print)
Kaiser-Bunbury, Christopher N.; Valentin, Terence; Mougal, James; Matatiken, Denis; Ghazoul, Jaboury	The tolerance of island plant-pollinator networks to alien plants	JOURNAL OF ECOLOGY	99	202	10.1111/j.1365-2745.2010.01732.x	2011	0022-0477
Green, Stephanie J.; Akins, John L.; Cote, Isabelle M.	Foraging behaviour and prey consumption in the Indo-Pacific lionfish on Bahamian coral reefs	MARINE ECOLOGY PROGRESS SERIES	433	159	10.3354/meps09208	2011	0171-8630
Kristensen, Erik; Hansen, Tanja; Delefosse, Matthieu; Banta, Gary T.; Quintana, Cintia O.	Contrasting effects of the polychaetes Marenzelleria viridis and Nereis diversicolor on benthic metabolism and solute transport in sandy coastal sediment	MARINE ECOLOGY PROGRESS SERIES	425	125	10.3354/meps09007	2011	0171-8630
Drouin, Annick; McKindsey, Christopher W.; Johnson, Ladd E.	Higher abundance and diversity in faunal assemblages with the invasion of Codium fragile ssp fragile in eelgrass meadows	MARINE ECOLOGY PROGRESS SERIES	424	105	10.3354/meps08961	2011	0171-8630
Bishop, M. J.; Hutchings, P. A.	How useful are port surveys focused on target pest identification for exotic species management?	MARINE POLLUTION BULLETIN	62	36	10.1016/j.marpolbul.2010.09.014	2011	0025-326X
Ferrer Merino, Francisco; Donat, Pilar M.	Invasive Plants in the Coastal Vegetal Communities in Valencia (Spain)	NOTULAE BOTANICAE HORTI AGROBOTANICI CLUJ-NAPOCA	39	9		2011	0255-965X
Padilla, Dianna K.; McCann, Michael J.; Shumway, Sandra E.	Marine invaders and bivalve aquaculture: sources, impacts, and consequences	Shellfish Aquaculture and the Environment		395		2011
	Treatise on Estuarine and Coastal Science, Vol 7: Functioning of Ecosystems at the Land-Ocean Interface	Treatise on Estuarine and Coastal Science, Vol 7: Functioning of Ecosystems at the Land-Ocean Interface				2011
Levin, L. A.; Crooks, J. A.	Functional Consequences of Invasive Species in Coastal and Estuarine Systems	Treatise on Estuarine and Coastal Science, Vol 7: Functioning of Ecosystems at the Land-Ocean Interface		17		2011
Olenin, S.; Minchin, D.	Biological Introductions to the Systems: Macroorganisms	Treatise on Estuarine and Coastal Science, Vol 8: Human-Induced Problems (Uses and Abuses)		149		2011
Martin, Charles W.; Valentine, Marla M.; Valentine, John F.	Competitive Interactions between Invasive Nile Tilapia and Native Fish: The Potential for Altered Trophic Exchange and Modification of Food Webs	PLOS ONE	5		10.1371/journal.pone.0014395	2010	1932-6203
Thomsen, Mads Solgaard	Experimental evidence for positive effects of invasive seaweed on native invertebrates via habitat-formation in a seagrass bed	AQUATIC INVASIONS	5	341	10.3391/ai.2010.5.4.02	2010	1798-6540
Steers, Robert J.	ROCK OUTCROPS HARBOR NATIVE PERENNIALS IN TYPE-CONVERTED COASTAL SCRUB	WESTERN NORTH AMERICAN NATURALIST	70	516	10.3398/064.070.0412	2010	1527-0904
Faggi, Ana M.; Dadon, Jose	Vegetation changes associated to coastal tourist urbanizations	Multequina: Latin American journal of natural resources	19	53		2010	1852-7329
Cheng, Brian S.; Hovel, Kevin A.	Biotic resistance to invasion along an estuarine gradient	OECOLOGIA	164	1049	10.1007/s00442-010-1700-7	2010	0029-8549
Sorte, Cascade J. B.; Fuller, Adam; Bracken, Matthew E. S.	Impacts of a simulated heat wave on composition of a marine community	OIKOS	119	1909	10.1111/j.1600-0706.2010.18663.x	2010	0030-1299
Haab, Timothy C.; Whitehead, John C.; Parsons, George R.; Price, Jammie	Effects of information about invasive species on risk perception and seafood demand by gender and race	RESOURCE AND ENERGY ECONOMICS	32	586	10.1016/j.reseneeco.2010.04.008	2010	0928-7655
Zarnetske, Phoebe L.; Seabloom, Eric W.; Hacker, Sally D.	Non-target effects of invasive species management: beachgrass, birds, and bulldozers in coastal dunes	ECOSPHERE	1		10.1890/ES10-00101.1	2010	2150-8925
McCormick, Melissa K.; Kettenring, Karin M.; Baron, Heather M.; Whigham, Dennis F.	Spread of invasive Phragmites australis in estuaries with differing degrees of development: genetic patterns, Allee effects and interpretation	JOURNAL OF ECOLOGY	98	1369	10.1111/j.1365-2745.2010.01712.x	2010	0022-0477
Yelenik, Stephanie G.; Levine, Jonathan M.	Processes Limiting Native Shrub Recovery in Exotic Grasslands after Non-Native Herbivore Removal	RESTORATION ECOLOGY	18	418	10.1111/j.1526-100X.2009.00598.x	2010	1061-2971
Vazquez-Luis, Maite; Sanchez-Jerez, Pablo; Bayle-Sempere, Just T.	Effects of Caulerpa racemosa var. cylindracea on prey availability: an experimental approach to predation of amphipods by Thalassoma pavo (Labridae)	HYDROBIOLOGIA	654	147	10.1007/s10750-010-0378-5	2010	0018-8158
Troost, Karin	Causes and effects of a highly successful marine invasion: Case-study of the introduced Pacific oyster Crassostrea gigas in continental NW European estuaries	JOURNAL OF SEA RESEARCH	64	145	10.1016/j.seares.2010.02.004	2010	1385-1101
Olenina, Irina; Wasmund, Norbert; Hajdu, Susanna; Jurgensone, Iveta; Gromisz, Slawomira; Kownacka, Janina; Toming, Kaire; Vaiciute, Diana; Olenin, Sergej	Assessing impacts of invasive phytoplankton: The Baltic Sea case	MARINE POLLUTION BULLETIN	60	1691	10.1016/j.marpolbul.2010.06.046	2010	0025-326X
O'Connor, Jody A.; Robertson, Jeremy; Kleindorfer, Sonia	Video analysis of host-parasite interactions in nests of Darwin's finches	ORYX	44	588	10.1017/S0030605310000086	2010	0030-6053
Alba-Lynn, Christina; Henk, Shanna	Potential for ants and vertebrate predators to shape seed-dispersal dynamics of the invasive thistles Cirsium arvense and Carduus nutans in their introduced range (North America)	PLANT ECOLOGY	210	291	10.1007/s11258-010-9757-2	2010	1385-0237
Lach, Lori; Tillberg, Chadwick V.; Suarez, Andrew V.	Contrasting effects of an invasive ant on a native and an invasive plant	BIOLOGICAL INVASIONS	12	3123	10.1007/s10530-010-9703-1	2010	1387-3547
Whitlow, W. Lindsay	Changes in survivorship, behavior, and morphology in native soft-shell clams induced by invasive green crab predators	MARINE ECOLOGY-AN EVOLUTIONARY PERSPECTIVE	31	418	10.1111/j.1439-0485.2009.00350.x	2010	0173-9565
Loebmann, Daniel; Mai, Ana Cecilia G.; Lee, James T.	The invasion of five alien species in the Delta do Parnaiba Environmental Protection Area, Northeastern Brazil	REVISTA DE BIOLOGIA TROPICAL	58	909		2010	0034-7744
Padilla, Dianna K.	Context-dependent Impacts of a Non-native Ecosystem Engineer, the Pacific Oyster Crassostrea gigas	INTEGRATIVE AND COMPARATIVE BIOLOGY	50	213	10.1093/icb/icq080	2010	1540-7063
Heiman, Kimberly W.; Micheli, Fiorenza	Non-native Ecosystem Engineer Alters Estuarine Communities	INTEGRATIVE AND COMPARATIVE BIOLOGY	50	226	10.1093/icb/icq036	2010	1540-7063
Badiou, Pascal H. J.; Goldsborough, L. Gordon	Ecological Impacts of an Exotic Benthivorous Fish in Large Experimental Wetlands, Delta Marsh, Canada	WETLANDS	30	657	10.1007/s13157-010-0071-5	2010	0277-5212
Maltez-Mouro, Sara; Maestre, Fernando T.; Freitas, Helena	Weak effects of the exotic invasive Carpobrotus edulis on the structure and composition of Portuguese sand-dune communities	BIOLOGICAL INVASIONS	12	2117	10.1007/s10530-009-9613-2	2010	1387-3547
Hilton, Geoff M.; Cuthbert, Richard J.	The catastrophic impact of invasive mammalian predators on birds of the UK Overseas Territories: a review and synthesis	IBIS	152	443		2010	0019-1019
Pedersen, Ashild O.; Yoccoz, Nigel G.; Ims, Rolf A.; Sigurdsen, Therese	Effects of non-native spruce plantations on small mammal communities in subarctic birch forests	FOREST ECOLOGY AND MANAGEMENT	260	331	10.1016/j.foreco.2010.04.020	2010	0378-1127
Torchin, Mark E.	Native fish grows faster in the presence of a potential introduced competitor	AQUATIC INVASIONS	5	163	10.3391/ai.2010.5.2.05	2010	1798-6540
Woodward, F. I.; Quaife, T.; Lomas, M. R.	CHANGING CLIMATE AND THE IRISH LANDSCAPE	BIOLOGY AND ENVIRONMENT-PROCEEDINGS OF THE ROYAL IRISH ACADEMY	110B	1	10.3318/BIOE.2010.110.1.1	2010	0791-7945
Byers, James E.; Wright, Jeffrey T.; Gribben, Paul E.	Variable direct and indirect effects of a habitat-modifying invasive species on mortality of native fauna	ECOLOGY	91	1787	10.1890/09-0712.1	2010	0012-9658
Mainka, Susan A.; Howard, Geoffrey W.	Climate change and invasive species: double jeopardy	INTEGRATIVE ZOOLOGY	5	102	10.1111/j.1749-4877.2010.00193.x	2010	1749-4877
Martinez-Luscher, Johann; Holmer, Marianne	Potential effects of the invasive species Gracilaria vermiculophylla on Zostera marina metabolism and survival	MARINE ENVIRONMENTAL RESEARCH	69	345	10.1016/j.marenvres.2009.12.009	2010	0141-1136
Cibrian-Jaramillo, Angelica; Daly, A. C.; Brenner, E.; Desalle, R.; Marler, T. E.	When North and South don't mix: genetic connectivity of a recently endangered oceanic cycad, Cycas micronesica, in Guam using EST-microsatellites	MOLECULAR ECOLOGY	19	2364	10.1111/j.1365-294X.2010.04638.x	2010	0962-1083
Salo, Palvi; Ahola, Markus P.; Korpimaki, Erkki	Habitat-mediated impact of alien mink predation on common frog densities in the outer archipelago of the Baltic Sea	OECOLOGIA	163	405	10.1007/s00442-010-1573-9	2010	0029-8549
Wright, Jeffrey T.; Byers, James E.; Koukoumaftsis, Loni P.; Ralph, Peter J.; Gribben, Paul E.	Native species behaviour mitigates the impact of habitat-forming invasive seaweed	OECOLOGIA	163	527	10.1007/s00442-010-1608-2	2010	0029-8549
Thomsen, Mad S.; Wernberg, Thomas; Tuya, Fernando; Silliman, Brian R.	Ecological performance and possible origin of a ubiquitous but under-studied gastropod	ESTUARINE COASTAL AND SHELF SCIENCE	87	501	10.1016/j.ecss.2010.02.014	2010	0272-7714
Lopez Gappa, Juan; Carranza, Alvar; Gianuca, Norton M.; Scarabino, Fabrizio	Membraniporopsis tubigera, an invasive bryozoan in sandy beaches of southern Brazil and Uruguay	BIOLOGICAL INVASIONS	12	977	10.1007/s10530-009-9522-4	2010	1387-3547
Altieri, Andrew H.; van Wesenbeeck, Bregje K.; Bertness, Mark D.; Silliman, Brian R.	Facilitation cascade drives positive relationship between native biodiversity and invasion success	ECOLOGY	91	1269	10.1890/09-1301.1	2010	0012-9658
Banks, Sam C.; Ling, Scott D.; Johnson, Craig R.; Piggott, Maxine P.; Williamson, Jane E.; Beheregaray, Luciano B.	Genetic structure of a recent climate change-driven range extension	MOLECULAR ECOLOGY	19	2011	10.1111/j.1365-294X.2010.04627.x	2010	0962-1083
Kuljian, Howard; Varner, J. Morgan	The effects of sudden oak death on foliar moisture content and crown fire potential in tanoak	FOREST ECOLOGY AND MANAGEMENT	259	2103	10.1016/j.foreco.2010.02.022	2010	0378-1127
Engeman, Richard M.; Laborde, Jose E.; Constantin, Bernice U.; Shwiff, Stephanie A.; Hall, Parker; Duffiney, Anthony; Luciano, Freddie	The economic impacts to commercial farms from invasive monkeys in Puerto Rico	CROP PROTECTION	29	401	10.1016/j.cropro.2009.10.021	2010	0261-2194
Yelenik, S. G.; Levine, J. M.	Native shrub reestablishment in exotic annual grasslands: Do ecosystem processes recover?	ECOLOGICAL APPLICATIONS	20	716	10.1890/08-2365.1	2010	1051-0761
Kaufman, Leyla V.; Wright, Mark G.	Parasitism of a Hawaiian Endemic Moth by Invasive and Purposely Introduced Hymenoptera Species	ENVIRONMENTAL ENTOMOLOGY	39	430	10.1603/EN09083	2010	0046-225X
Thiele, Jan; Isermann, Maike; Otte, Annette; Kollmann, Johannes	Competitive displacement or biotic resistance? Disentangling relationships between community diversity and invasion success of tall herbs and shrubs	JOURNAL OF VEGETATION SCIENCE	21	213	10.1111/j.1654-1103.2009.01139.x	2010	1100-9233
Grant-Hoffman, Madeline N.; Mulder, Christa P. H.; Bellingham, Peter J.	Effects of invasive rats and burrowing seabirds on seeds and seedlings on New Zealand islands	OECOLOGIA	162	1005	10.1007/s00442-009-1500-0	2010	0029-8549
Barret, J.; Richomme, C.; Moinet, M.	The accidental release of exotic species from breeding colonies and zoological collections	REVUE SCIENTIFIQUE ET TECHNIQUE-OFFICE INTERNATIONAL DES EPIZOOTIES	29	113		2010	0253-1933
Goldstien, S. J.; Schiel, D. R.; Gemmell, N. J.	Regional connectivity and coastal expansion: differentiating pre-border and post-border vectors for the invasive tunicate Styela clava	MOLECULAR ECOLOGY	19	874	10.1111/j.1365-294X.2010.04527.x	2010	0962-1083
Cabanellas-Reboredo, Miguel; Blanco, Andreu; Deudero, Salud; Tejada, Silvia	Effects of the invasive macroalga Lophocladia lallemandii on the diet and trophism of Pinna nobilis (Mollusca: Bivalvia) and its guests Pontonia pinnophylax and Nepinnotheres pinnotheres (Crustacea: Decapoda)	SCIENTIA MARINA	74	101	10.3989/scimar.2010.74n1101	2010	0214-8358
Davis, Naomi E.; O'Dowd, Dennis J.; Mac Nally, Ralph; Green, Peter T.	Invasive ants disrupt frugivory by endemic island birds	BIOLOGY LETTERS	6	85	10.1098/rsbl.2009.0655	2010	1744-9561
Grosholz, E.	Avoidance by grazers facilitates spread of an invasive hybrid plant	ECOLOGY LETTERS	13	145	10.1111/j.1461-0248.2009.01409.x	2010	1461-023X
Bodey, Thomas W.; Bearhop, Stuart; Roy, Sugoto S.; Newton, Jason; McDonald, Robbie A.	Behavioural responses of invasive American mink Neovison vison to an eradication campaign, revealed by stable isotope analysis	JOURNAL OF APPLIED ECOLOGY	47	114	10.1111/j.1365-2664.2009.01739.x	2010	0021-8901
Lang, Anne C.; Buschbaum, Christian	Facilitative effects of introduced Pacific oysters on native macroalgae are limited by a secondary invader, the seaweed Sargassum muticum	JOURNAL OF SEA RESEARCH	63	119	10.1016/j.seares.2009.11.002	2010	1385-1101
Branch, George M.; Odendaal, Francois; Robinson, Tamara B.	Competition and facilitation between the alien mussel Mytilus galloprovincialis and indigenous species: Moderation by wave action	JOURNAL OF EXPERIMENTAL MARINE BIOLOGY AND ECOLOGY	383	65	10.1016/j.jembe.2009.10.007	2010	0022-0981
Geller, Jonathan B.; Darling, John A.; Carlton, James T.	Genetic Perspectives on Marine Biological Invasions	ANNUAL REVIEW OF MARINE SCIENCE	2	367	10.1146/annurev.marine.010908.163745	2010	1941-1405
Paganini, Adam; Kimmerer, Wim J.; Stillman, Jonathon H.	Metabolic responses to environmental salinity in the invasive clam Corbula amurensis	AQUATIC BIOLOGY	11	139	10.3354/ab00304	2010	1864-7790
Sweetman, A. K.; Middelburg, J. J.; Berle, A. M.; Bernardino, A. F.; Schander, C.; Demopoulos, A. W. J.; Smith, C. R.	Impacts of exotic mangrove forests and mangrove deforestation on carbon remineralization and ecosystem functioning in marine sediments	BIOGEOSCIENCES	7	2129	10.5194/bg-7-2129-2010	2010	1726-4170
Lettink, Marieke; Norbury, Grant; Cree, Alison; Seddon, Philip J.; Duncan, Richard P.; Schwarz, Carl J.	Removal of introduced predators, but not artificial refuge supplementation, increases skink survival in coastal duneland	BIOLOGICAL CONSERVATION	143	72	10.1016/j.biocon.2009.09.004	2010	0006-3207
Orendt, Claus; Schmitt, Claudia; van Liefferinge, Chris; Wolfram, Georg; de Deckere, Eric	Include or exclude? A review on the role and suitability of aquatic invertebrate neozoa as indicators in biological assessment with special respect to fresh and brackish European waters	BIOLOGICAL INVASIONS	12	265	10.1007/s10530-009-9448-x	2010	1387-3547
Jing, Kaipeng; 신소연; 송경섭; 권현주; 김용조; 김나영; 정소연; 박지훈; 서강식; 허준영; 박종일; 박승길; 권기량; 윤완희; 황병두; 임규	Mechanism of Anti-Invasive Action of Docosahexaenoic Acid in SW480 Human Colon Cancer Cell	Journal of Life Science	20	561		2010	1225-9918
Denslow, Michael W.; Palmer, Michael W.; Murrell, Zack E.	Patterns of native and exotic vascular plant richness along an elevational gradient from sea level to the summit of the Appalachian Mountains, USA	JOURNAL OF THE TORREY BOTANICAL SOCIETY	137	67	10.3159/09-RA-045.1	2010	1095-5674
van Beusekom, Justus E. E.; Buschbaum, Christian; Loebl, Martina; Martens, Peter; Reise, Karsten	Long-Term Ecological Change in the Northern Wadden Sea	Long-Term Ecological Research: Between Theory and Application		145	10.1007/978-90-481-8782-9_10	2010
Ashton, Gail V.; Burrows, Michael T.; Willis, Kate J.; Cook, Elizabeth J.	Seasonal population dynamics of the non-native Caprella mutica (Crustacea, Amphipoda) on the west coast of Scotland	MARINE AND FRESHWATER RESEARCH	61	549	10.1071/MF09162	2010	1323-1650
Janas, Urszula; Spicer, John I.	Seasonal and temperature effects on osmoregulation by the invasive prawn Palaemon elegans Rathke, 1837 in the Baltic Sea	MARINE BIOLOGY RESEARCH	6	333	10.1080/17451001003670086	2010	1745-1000
Taylor, Skye L.; Bishop, Melanie J.; Kelaher, Brendan P.; Glasby, Tim M.	Impacts of detritus from the invasive alga Caulerpa taxifolia on a soft sediment community	MARINE ECOLOGY PROGRESS SERIES	420	73	10.3354/meps08903	2010	0171-8630
Lyons, D. A.; Scheibling, R. E.; Van Alstyne, K. L.	Spatial and temporal variation in DMSP content in the invasive seaweed Codium fragile ssp fragile: effects of temperature, light and grazing	MARINE ECOLOGY PROGRESS SERIES	417	51	10.3354/meps08818	2010	0171-8630
Qin, Haiming; Chu, Tianjiang; Xu, Wang; Lei, Guangchun; Chen, Zhongbin; Quan, Weimin; Chen, Jiakuan; Wu, Jihua	Effects of invasive cordgrass on crab distributions and diets in a Chinese salt marsh	MARINE ECOLOGY PROGRESS SERIES	415	177	10.3354/meps08771	2010	0171-8630
Sellheim, Kirsten; Stachowicz, John J.; Coates, R. Cameron	Effects of a nonnative habitat-forming species on mobile and sessile epifaunal communities	MARINE ECOLOGY PROGRESS SERIES	398	69	10.3354/meps08341	2010	0171-8630
Zedda, L.; Cogoni, A.; Flore, F.; Brundu, Giuseppe	Impacts of alien plants and man-made disturbance on soil-growing bryophyte and lichen diversity in coastal areas of Sardinia (Italy)	PLANT BIOSYSTEMS	144	547	10.1080/11263501003638604	2010	1126-3504
Kawakami, Kazuto	What's the Bonin Islands?	Restoring the Oceanic Island Ecosystem: Impact and Management of Invasive Alien Species in the Bonin Islands		3	10.1007/978-4-431-53859-2_1	2010
Okochi, Isamu; Sato, Hiroki; Ohbayashi, Takashi	The cause of mollusk decline on the Ogasawara Islands	Restoring the Oceanic Island Ecosystem: Impact and Management of Invasive Alien Species in the Bonin Islands		15	10.1007/978-4-431-53859-2_3	2010
Ohbayashi, Takashi; Okochi, Isamu; Sato, Hiroki; Ono, Tsuyoshi; Chiba, Satoshi	Rapid decline of endemic snails in the Ogasawara Islands, Western Pacific Ocean	Restoring the Oceanic Island Ecosystem: Impact and Management of Invasive Alien Species in the Bonin Islands		27	10.1007/978-4-431-53859-2_4	2010
Ohbayashi, Takashi; Okochi, Isamu; Sato, Hiroki; Ono, Tsuyoshi	Food habit of Platydemus manokwari De Beauchamp, 1962 (Tricladida: Terricola: Rhynchodemidae), known as a predatory flatworm of land snails in the Ogasawara (Bonin) Islands, Japan	Restoring the Oceanic Island Ecosystem: Impact and Management of Invasive Alien Species in the Bonin Islands		35	10.1007/978-4-431-53859-2_5	2010
Sugiura, Shinji; Okochi, Isamu; Tamada, Hisashi	High Predation Pressure by an Introduced Flatworm on Land Snails on the Oceanic Ogasawara Islands	Restoring the Oceanic Island Ecosystem: Impact and Management of Invasive Alien Species in the Bonin Islands		41	10.1007/978-4-431-53859-2_6	2010
Fey, Karen; Banks, Peter B.; Ylonen, Hannu; Korpimaki, Erkki	Behavioural responses of voles to simulated risk of predation by a native and an alien mustelid: an odour manipulation experiment	WILDLIFE RESEARCH	37	273	10.1071/WR08031	2010	1035-3712
Fleming, Genie M.; Diffendorfer, James E.; Zedler, Paul H.	The relative importance of disturbance and exotic-plant abundance in California coastal sage scrub	ECOLOGICAL APPLICATIONS	19	2210	10.1890/07-1959.1	2009	1051-0761
Klein, Judith C.; Verlaque, Marc	Macrophyte assemblage associated with an invasive species exhibiting temporal variability in its development pattern	HYDROBIOLOGIA	636	369	10.1007/s10750-009-9966-7	2009	0018-8158
Lin, Mao T.; Thiet, R. K.; Cangialosi, K. R.	IMPACTS OF THE INVASIVE EUROPEAN FIRE ANT (MYRMICA RUBRA) ON COASTAL NEW ENGLAND SOILS.	JOURNAL OF NEMATOLOGY	41	348		2009	0022-300X
Wolkovich, Elizabeth M.; Bolger, Douglas T.; Cottingham, Kathryn L.	Invasive grass litter facilitates native shrubs through abiotic effects	JOURNAL OF VEGETATION SCIENCE	20	1121		2009	1100-9233
Katsanevakis, S.; Tsiamis, K.; Ioannou, G.; Michailidis, N.; Zenetos, A.	Inventory of alien marine species of Cyprus (2009)	MEDITERRANEAN MARINE SCIENCE	10	109		2009	1108-393X
Pauchard, Anibal; Kueffer, Christoph; Dietz, Hansjoerg; Daehler, Curtis C.; Alexander, Jake; Edwards, Peter J.; Ramon Arevalo, Jose; Cavieres, Lohengrin A.; Guisan, Antoine; Haider, Sylvia; Jakobs, Gabi; McDougall, Keith; Millar, Constance I.; Naylor, Bridgett J.; Parks, Catherine G.; Rew, Lisa J.; Seipel, Tim	Ain't no mountain high enough: plant invasions reaching new elevations	FRONTIERS IN ECOLOGY AND THE ENVIRONMENT	7	479	10.1890/080072	2009	1540-9295
Chown, Steven L.; Spear, Dian; Lee, Jennifer E.; Shaw, Justine D.	Animal introductions to southern systems: lessons for ecology and for policy	AFRICAN ZOOLOGY	44	248		2009	1562-7020
Fazli, Hasan; Zhang, Chang Ik; Hay, Douglas Edward; Lee, Chun-Woo	Stock assessment and management implications of anchovy kilka (Clupeonella engrauliformis) in Iranian waters of the Caspian Sea	FISHERIES RESEARCH	100	103	10.1016/j.fishres.2009.06.018	2009	0165-7836
Virah-Sawmy, Malika; Mauremootoo, John; Marie, Doreen; Motala, Saoud; Sevathian, Jean-Claude	Rapid degradation of a Mauritian rainforest following 60 years of plant invasion	ORYX	43	599	10.1017/S003060530999041X	2009	0030-6053
Brook, Sarah; Grant, Alastair; Bell, Diana	Can land crabs be used as a rapid ecosystem evaluation tool? A test using distribution and abundance of several genera from the Seychelles	ACTA OECOLOGICA-INTERNATIONAL JOURNAL OF ECOLOGY	35	711	10.1016/j.actao.2009.07.001	2009	1146-609X
Tassin, J.; Medoc, J. M.; Kull, C. A.; Riviere, J. N.; Balent, G.	Can invasion patches of Acacia mearnsii serve as colonizing sites for native plant species on Reunion (Mascarene archipelago)?	AFRICAN JOURNAL OF ECOLOGY	47	422	10.1111/j.1365-2028.2008.01021.x	2009	0141-6707
Hazelton, Peter D.; Grossman, Gary D.	The effects of turbidity and an invasive species on foraging success of rosyside dace (Clinostomus funduloides)	FRESHWATER BIOLOGY	54	1977	10.1111/j.1365-2427.2009.02248.x	2009	0046-5070
Siemann, Evan; Carrillo, Juli A.; Gabler, Christopher A.; Zipp, Roy; Rogers, William E.	Experimental test of the impacts of feral hogs on forest dynamics and processes in the southeastern US	FOREST ECOLOGY AND MANAGEMENT	258	546	10.1016/j.foreco.2009.03.056	2009	0378-1127
Zardi, Gerardo Ivan; Nicastro, Katy Rebecca; McQuaid, Christopher David; Gektidis, Marcos	Effects of Endolithic Parasitism on Invasive and Indigenous Mussels in a Variable Physical Environment	PLOS ONE	4		10.1371/journal.pone.0006560	2009	1932-6203
Wanless, Ross M.; Ryan, Peter G.; Altwegg, Res; Angel, Andrea; Cooper, John; Cuthbert, Richard; Hilton, Geoff M.	From both sides: Dire demographic consequences of carnivorous mice and longlining for the Critically Endangered Tristan albatrosses on Gough Island	BIOLOGICAL CONSERVATION	142	1710	10.1016/j.biocon.2009.03.008	2009	0006-3207
Angel, Andrea; Wanless, Ross M.; Cooper, John	Review of impacts of the introduced house mouse on islands in the Southern Ocean: are mice equivalent to rats?	BIOLOGICAL INVASIONS	11	1743	10.1007/s10530-008-9401-4	2009	1387-3547
Byrnes, Jarrett; Stachowicz, John J.	Short and long term consequences of increases in exotic species richness on water filtration by marine invertebrates	ECOLOGY LETTERS	12	830	10.1111/j.1461-0248.2009.01339.x	2009	1461-023X
Aravena, Guillermo; Villate, Fernando; Uriarte, Ibon; Iriarte, Arantza; Ibanez, Berta	Response of Acartia populations to environmental variability and effects of invasive congenerics in the estuary of Bilbao, Bay of Biscay	ESTUARINE COASTAL AND SHELF SCIENCE	83	621	10.1016/j.ecss.2009.05.013	2009	0272-7714
Little, C.; Lara, A.; McPhee, J.; Urrutia, R.	Revealing the impact of forest exotic plantations on water yield in large scale watersheds in South-Central Chile	JOURNAL OF HYDROLOGY	374	162	10.1016/j.jhydrol.2009.06.011	2009	0022-1694
Padron, Benigno; Traveset, Anna; Biedenweg, Tine; Diaz, Diana; Nogales, Manuel; Olesen, Jens M.	Impact of Alien Plant Invaders on Pollination Networks in Two Archipelagos	PLOS ONE	4		10.1371/journal.pone.0006275	2009	1932-6203
Bruschetti, Martin; Bazterrica, Cielo; Luppi, Tomas; Iribarne, Oscar	An invasive intertidal reef-forming polychaete affect habitat use and feeding behavior of migratory and locals birds in a SW Atlantic coastal lagoon	JOURNAL OF EXPERIMENTAL MARINE BIOLOGY AND ECOLOGY	375	76	10.1016/j.jembe.2009.05.008	2009	0022-0981
Usio, Nisikawa; Kamiyama, Rui; Saji, Azumi; Takamura, Noriko	Size-dependent impacts of invasive alien crayfish on a littoral marsh community	BIOLOGICAL CONSERVATION	142	1480	10.1016/j.biocon.2009.02.016	2009	0006-3207
Smith, J. E.	ECOLOGICAL IMPACTS OF INVADERS ON TROPICAL REEFS	PHYCOLOGIA	48	122		2009	0031-8884
Miller, Elisa M.; Seastedt, T. R.	Impacts of woodchip amendments and soil nutrient availability on understory vegetation establishment following thinning of a ponderosa pine forest	FOREST ECOLOGY AND MANAGEMENT	258	263	10.1016/j.foreco.2009.04.011	2009	0378-1127
Gan, Xiaojing; Cai, Yinting; Choi, Chiyeung; Ma, Zhijun; Chen, Jiakuan; Li, Bo	Potential impacts of invasive Spartina alterniflora on spring bird communities at Chongming Dongtan, a Chinese wetland of international importance	ESTUARINE COASTAL AND SHELF SCIENCE	83	211	10.1016/j.ecss.2009.03.026	2009	0272-7714
Nicastro, Andrea; Bishop, Melanie J.; Kelaher, Brendan P.; Benedetti-Cecchi, Lisandro	Export of non-native gastropod shells to a coastal lagoon: Alteration of habitat structure has negligible effects on infauna	JOURNAL OF EXPERIMENTAL MARINE BIOLOGY AND ECOLOGY	374	31	10.1016/j.jembe.2009.04.005	2009	0022-0981
Phiri, Ethel E.; Mcgeoch, Melodie A.; Chown, Steven L.	Spatial variation in structural damage to a keystone plant species in the sub-Antarctic: interactions between Azorella selago and invasive house mice	ANTARCTIC SCIENCE	21	189	10.1017/S0954102008001569	2009	0954-1020
Thieltges, David W.; Reise, Karsten; Prinz, Katrin; Jensen, K. Thomas	Invaders interfere with native parasite-host interactions	BIOLOGICAL INVASIONS	11	1421	10.1007/s10530-008-9350-y	2009	1387-3547
Fey, Karen; Banks, Peter B.; Oksanen, Lauri; Korpimaki, Erkki	Does removal of an alien predator from small islands in the Baltic Sea induce a trophic cascade?	ECOGRAPHY	32	546	10.1111/j.1600-0587.2008.05637.x	2009	0906-7590
Safaverdi, S.; Roshani, F.; Rashti, M. Lamehi; Golkhoo, Sh.; Hassan, Z. M.; Langroudi, L.	Micro-pixe analysis in invasive ductal carcinoma tissues after treatment of astaxanthin	IRANIAN JOURNAL OF RADIATION RESEARCH	7	33		2009	1728-4554
Rowles, Alexei D.; O'Dowd, Dennis J.	Impacts of the invasive Argentine ant on native ants and other invertebrates in coastal scrub in south-eastern Australia	AUSTRAL ECOLOGY	34	239	10.1111/j.1442-9993.2008.01922.x	2009	1442-9985
Tang, Long; Gao, Yang; Wang, Jinqing; Wang, Chenghuan; Li, Bo; Chen, Jiakuan; Zhao, Bin	Designing an effective clipping regime for controlling the invasive plant Spartina alterniflora in an estuarine salt marsh	ECOLOGICAL ENGINEERING	35	874	10.1016/j.ecoleng.2008.12.016	2009	0925-8574
Amat, Jaen Nieto; Tempera, Fernando	Zoobotryon verticillatum Della Chiaje, 1822 (Bryozoa), a new occurrence in the archipelago of the Azores (North-Eastern Atlantic)	MARINE POLLUTION BULLETIN	58	761	10.1016/j.marpolbul.2009.02.019	2009	0025-326X
Chen, Zhongbing; Guo, Li; Jin, Binsong; Wu, Jihua; Zheng, Guanghong	Effect of the exotic plant Spartina alterniflora on macrobenthos communities in salt marshes of the Yangtze River Estuary, China	ESTUARINE COASTAL AND SHELF SCIENCE	82	265	10.1016/j.ecss.2009.01.014	2009	0272-7714
Marchante, Elizabete; Kjoller, Annelise; Struwe, Sten; Freitas, Helena	Soil recovery after removal of the N-2-fixing invasive Acacia longifolia: consequences for ecosystem restoration	BIOLOGICAL INVASIONS	11	813	10.1007/s10530-008-9295-1	2009	1387-3547
Griffen, Blaine D.; Byers, James E.	Community impacts of two invasive crabs: the interactive roles of density, prey recruitment, and indirect effects	BIOLOGICAL INVASIONS	11	927	10.1007/s10530-008-9305-3	2009	1387-3547
Roura-Pascual, Nuria; Brotons, Lluis; Peterson, A. Townsend; Thuiller, Wilfried	Consensual predictions of potential distributional areas for invasive species: a case study of Argentine ants in the Iberian Peninsula	BIOLOGICAL INVASIONS	11	1017	10.1007/s10530-008-9313-3	2009	1387-3547
Wan, Shuwen; Qin, Pei; Liu, Jine; Zhou, Hongxiang	The positive and negative effects of exotic Spartina alterniflora in China	ECOLOGICAL ENGINEERING	35	444	10.1016/j.ecoleng.2008.05.020	2009	0925-8574
Li, Bo; Liao, Chengz-hang; Zhang, Xiao-dong; Chen, Hui-li; Wang, Qing; Chen, Zhong-yi; Gan, Xiao-jing; Wu, Ji-hua; Zhao, Bin; Ma, Zhi-jun; Cheng, Xiao-li; Jiang, Li-fen; Chen, Jia-kuan	Spartina alterniflora invasions in the Yangtze River estuary, China: An overview of current status and ecosystem effects	ECOLOGICAL ENGINEERING	35	511	10.1016/j.ecoleng.2008.05.013	2009	0925-8574
Zhou, Hong-Xia; Liu, Jin-e; Qin, Pei	Impacts of an alien species (Spartina alterniflora) on the macrobenthos community of Jiangsu coastal inter-tidal ecosystem	ECOLOGICAL ENGINEERING	35	521	10.1016/j.ecoleng.2008.06.007	2009	0925-8574
Li, Hongli; Zhi, Yingbiao; An, Shuqing; Zhao, Lei; Zhou, Changfang; Deng, Zifa; Gu, Shuping	Density-dependent effects on the dieback of exotic species Spartina anglica in coastal China	ECOLOGICAL ENGINEERING	35	544	10.1016/j.ecoleng.2008.03.001	2009	0925-8574
Caparkaya, Deniz; Cavas, Levent; Kesercioglu, Teoman	The Bio-Stimulating Effects of Invasive Caulerpa Var. cylindracea Extract on Vignia sinensis and Phaseolus vulgaris (Fabaceae)	HACETTEPE JOURNAL OF BIOLOGY AND CHEMISTRY	37	123		2009	1303-5002
Baker, Amanda J.; Stiling, Peter	Comparing the effects of the exotic cactus-feeding moth, Cactoblastis cactorum (Berg) (Lepidoptera: Pyralidae) and the native cactus-feeding moth, Melitara prodenialis (Walker) (Lepidoptera: Pyralidae) on two species of Florida Opuntia	BIOLOGICAL INVASIONS	11	619	10.1007/s10530-008-9276-4	2009	1387-3547
Wu, Yu-Tong; Wang, Cheng-Huan; Zhang, Xiao-Dong; Zhao, Bin; Jiang, Li-Fen; Chen, Jia-Kuan; Li, Bo	Effects of saltmarsh invasion by Spartina alterniflora on arthropod community structure and diets	BIOLOGICAL INVASIONS	11	635	10.1007/s10530-008-9279-1	2009	1387-3547
Sugiura, Shinji; Yamaura, Yuichi	Potential impacts of the invasive flatworm Platydemus manokwari on arboreal snails	BIOLOGICAL INVASIONS	11	737	10.1007/s10530-008-9287-1	2009	1387-3547
Hansen, Dennis M.; Mueller, Christine B.	Invasive Ants Disrupt Gecko Pollination and Seed Dispersal of the Endangered Plant Roussea simplex in Mauritius	BIOTROPICA	41	202	10.1111/j.1744-7429.2008.00473.x	2009	0006-3606
Chaplin, Glen I.; Valentine, John F.	Macroinvertebrate Production in the Submerged Aquatic Vegetation of the Mobile-Tensaw Delta: Effects of an Exotic Species at the Base of an Estuarine Food Web	ESTUARIES AND COASTS	32	319	10.1007/s12237-008-9117-9	2009	1559-2723
Ficetola, Gentile Francesco; Padoa-Schioppa, Emilio	Human activities alter biogeographical patterns of reptiles on Mediterranean islands	GLOBAL ECOLOGY AND BIOGEOGRAPHY	18	214	10.1111/j.1466-8238.2008.00433.x	2009	1466-822X
Bouma, Tjeerd J.; Olenin, Sergej; Reise, Karsten; Ysebaert, Tom	Ecosystem engineering and biodiversity in coastal sediments: posing hypotheses	HELGOLAND MARINE RESEARCH	63	95	10.1007/s10152-009-0146-y	2009	1438-387X
Buhle, Eric R.; Ruesink, Jennifer L.	IMPACTS OF INVASIVE OYSTER DRILLS ON OLYMPIA OYSTER (OSTREA LURIDA CARPENTER 1864) RECOVERY IN WILLAPA BAY, WASHINGTON, UNITED STATES	JOURNAL OF SHELLFISH RESEARCH	28	87	10.2983/035.028.0115	2009	0730-8000
Towns, David R.; Wardle, David A.; Mulder, Christa P. H.; Yeates, Gregor W.; Fitzgerald, Brian M.; Parrish, G. Richard; Bellingham, Peter J.; Bonner, Karen I.	Predation of seabirds by invasive rats: multiple indirect consequences for invertebrate communities	OIKOS	118	420	10.1111/j.1600-0706.2008.17186.x	2009	0030-1299
Harvey, Julio B. J.; Hoy, Marshal S.; Rodriguez, Rusty J.	Molecular detection of native and invasive marine invertebrate larvae present in ballast and open water environmental samples collected in Puget Sound	JOURNAL OF EXPERIMENTAL MARINE BIOLOGY AND ECOLOGY	369	93	10.1016/j.jembe.2008.10.030	2009	0022-0981
Moseman, Serena M.; Zhang, Rui; Qian, Pei Yuan; Levin, Lisa A.	Diversity and functional responses of nitrogen-fixing microbes to three wetland invasions	BIOLOGICAL INVASIONS	11	225	10.1007/s10530-008-9227-0	2009	1387-3547
Molina, Lucas M.; Valinas, Macarena S.; Pratolongo, Paula D.; Elias, Rodolfo; Perillo, Gerardo M. E.	First record of the sea anemone Diadumene lineata (Verrill 1871) associated to Spartina alterniflora roots and stems, in marshes at the Bahia Blanca estuary, Argentina	BIOLOGICAL INVASIONS	11	409	10.1007/s10530-008-9258-6	2009	1387-3547
Wardle, David A.; Bellingham, Peter J.; Bonner, Karen I.; Mulder, Christa P. H.	Indirect effects of invasive predators on litter decomposition and nutrient resorption on seabird-dominated islands	ECOLOGY	90	452	10.1890/08-0097.1	2009	0012-9658
Herborg, Leif-Matthias; O'Hara, Patrick; Therriault, Thomas W.	Forecasting the potential distribution of the invasive tunicate Didemnum vexillum	JOURNAL OF APPLIED ECOLOGY	46	64	10.1111/j.1365-2664.2008.01568.x	2009	0021-8901
Bergstrom, Dana M.; Lucieer, Arko; Kiefer, Kate; Wasley, Jane; Belbin, Lee; Pedersen, Tore K.; Chown, Steven L.	Indirect effects of invasive species removal devastate World Heritage Island	JOURNAL OF APPLIED ECOLOGY	46	73	10.1111/j.1365-2664.2008.01601.x	2009	0021-8901
Bulleri, F.; Tamburello, L.; Benedetti-Cecchi, L.	Loss of consumers alters the effects of resident assemblages on the local spread of an introduced macroalga	OIKOS	118	269	10.1111/j.1600-0706.2008.16955.x	2009	0030-1299
Field, Iain C.; Meekan, Mark G.; Buckworth, Rik C.; Bradshaw, Corey J. A.	SUSCEPTIBILITY OF SHARKS, RAYS AND CHIMAERAS TO GLOBAL EXTINCTION	ADVANCES IN MARINE BIOLOGY, VOL 56	56	275	10.1016/S0065-2881(09)56004-X	2009	0065-2881
Gedan, K. Bromberg; Silliman, B. R.; Bertness, M. D.	Centuries of Human-Driven Change in Salt Marsh Ecosystems	ANNUAL REVIEW OF MARINE SCIENCE	1	117	10.1146/annurev.marine.010908.163930	2009	1941-1405
Gribben, Paul E.; Wright, Jeffrey T.; O'Connor, Wayne A.; Steinberg, Peter	Larval settlement preference of a native bivalve: the influence of an invasive alga versus native substrata	AQUATIC BIOLOGY	7	217	10.3354/ab00196	2009	1864-7790
Ejdung, Gunilla; Flach, Elsina; Byren, Lars; Hummel, Herman	Predation by crustaceans on native and non-native Baltic clams	AQUATIC BIOLOGY	6	15	10.3354/ab00155	2009	1864-7790
Nield, Andrew P.; Ladd, Philip G.; Yates, Colin J.	Reproductive biology, post-fire succession dynamics and population viability analysis of the critically endangered Western Australian shrub Calytrix breviseta subsp breviseta (Myrtaceae)	AUSTRALIAN JOURNAL OF BOTANY	57	451	10.1071/BT09043	2009	0067-1924
Dafforn, K. A.; Johnston, E. L.; Glasby, T. M.	Shallow moving structures promote marine invader dominance	BIOFOULING	25	277	10.1080/08927010802710618	2009	0892-7014
Smith, Gideon F.; Figueiredo, Estrela	Aloe arborescens Mill. (Asphodelaceae) is spreading in Portugal	BRADLEYA	27	165		2009	0265-086X
Roman, Sara; Perez-Ruzafa, Angel; Lopez, Eduardo	First record in the Western Mediterranean Sea of Branchiomma boholense (Grube, 1878) (Polychaeta: Sabellidae), an alien species of Indo-Pacific origin	CAHIERS DE BIOLOGIE MARINE	50	241		2009	0007-9723
Hacker, Sally D.; Dethier, Megan N.	Differing Consequences of Removing Ecosystem-Modifying Invaders: Significance of Impact and Community Context to Restoration Potential	Ecological Studies	204	375		2009	0070-8356(print)
Jorgensen, Rasmus Halfdan; Kollmann, Johannes	Invasion of coastal dunes by the alien shrub Rosa rugosa is associated with roads, tracks and houses	FLORA	204	289	10.1016/j.flora.2008.03.002	2009	0367-2530
김광수	A study on the identity of Swahili history and civilization focusing on the Afrocentrism	Journal of International Area Studies	13	57		2009	1226-5810
Carranza, Alvar; Ines Borthagaray, Ana	The brown mussel Perna perna in the native mussel beds of Cerro Verde (Uruguay)	Marine Biodiversity Records	2	e76	10.1017/S1755267209000608	2009	1755-2672
Griffen, Blaine D.	Effects of a newly invasive parasite on the burrowing mud shrimp, a widespread ecosystem engineer	MARINE ECOLOGY PROGRESS SERIES	391	73	10.3354/meps08228	2009	0171-8630
Scheibling, Robert E.; Gagnon, Patrick	Temperature-mediated outbreak dynamics of the invasive bryozoan Membranipora membranacea in Nova Scotian kelp beds	MARINE ECOLOGY PROGRESS SERIES	390	1	10.3354/meps08207	2009	0171-8630
Laruelle, G. G.; Regnier, P.; Ragueneau, O.; Kempa, M.; Moriceau, B.; Longphuirt, S. Ni; Leynaert, A.; Thouzeau, G.; Chauvaud, L.	Benthic-pelagic coupling and the seasonal silica cycle in the Bay of Brest (France): new insights from a coupled physical-biological model	MARINE ECOLOGY PROGRESS SERIES	385	15	10.3354/meps07884	2009	0171-8630
Strain, Elisabeth M. A.; Johnson, Craig R.	Competition between an invasive urchin and commercially fished abalone: effect on body condition, reproduction and survivorship	MARINE ECOLOGY PROGRESS SERIES	377	169	10.3354/meps07816	2009	0171-8630
Gribben, Paul E.; Wright, Jeffrey T.; O'Connor, Wayne A.; Doblin, Martina A.; Eyre, Bradley; Steinberg, Peter D.	Reduced performance of native infauna following recruitment to a habitat-forming invasive marine alga	OECOLOGIA	158	733	10.1007/s00442-008-1181-0	2009	0029-8549
Goldberg, Nisse; Heine, John	A comparison of arborescent vegetation pre- (1983) and post- (2008) outbreak of the invasive species the Asian ambrosia beetle Xyleborus glabratus in a Florida maritime hammock	PLANT ECOLOGY & DIVERSITY	2	77	10.1080/17550870902852775	2009	1755-0874
Sudnik-Wojcikowska, Barbara; Moysiyenko, Ivan; Slim, Pieter A.; Moraczewski, Ireneusz R.	IMPACT OF THE INVASIVE SPECIES ELAEAGNUS ANGUSTIFOLIA L. ON VEGETATION IN PONTIC DESERT STEPPE ZONE (SOUTHERN UKRAINE)	POLISH JOURNAL OF ECOLOGY	57	269		2009	1505-2249
Yuan, Zening; Shi, Fuchen	ECOLOGICAL ADAPTATION STRATEGIES IN ALIEN SPECIES: EFFECTS OF SALINITY, TEMPERATURE AND PHOTOPERIOD ON SPARTINA ALTERNIFLORA LOISEL. SEED GERMINATION	POLISH JOURNAL OF ECOLOGY	57	677		2009	1505-2249
Padysakova, Eliska; Salek, Martin; Polednik, Lukas; Sedlacek, Frantisek; Albrecht, Tomas	Removal of American mink increases the success of simulated nests in linear habitat	WILDLIFE RESEARCH	36	225	10.1071/WR08022	2009	1035-3712
Henkel, Sarah K.; Hofmann, Gretchen E.	Thermal ecophysiology of gametophytes cultured from invasive Undaria pinnatifida (Harvey) Suringar in coastal California harbors	JOURNAL OF EXPERIMENTAL MARINE BIOLOGY AND ECOLOGY	367	164	10.1016/j.jembe.2008.09.010	2008	0022-0981
Bersine, Karen; Brenneis, Valance E. F.; Draheim, Robyn C.; Rub, A. Michelle Wargo; Zamon, Jeannette E.; Litton, Rodney K.; Hinton, Susan A.; Sytsma, Mark D.; Cordell, Jeffery R.; Chapman, John W.	Distribution of the invasive New Zealand mudsnail (Potamopyrgus antipodarum) in the Columbia River Estuary and its first recorded occurrence in the diet of juvenile Chinook salmon (Oncorhynchus tshawytscha)	BIOLOGICAL INVASIONS	10	1381	10.1007/s10530-007-9213-y	2008	1387-3547
Elkinton, Joseph S.; Preisser, Evan; Boettner, George; Parry, Dylan	Factors Influencing Larval Survival of the Invasive Browntail Moth (Lepidoptera: Lymantriidae) in Relict North American Populations	ENVIRONMENTAL ENTOMOLOGY	37	1429	10.1603/0046-225X-37.6.1429	2008	0046-225X
le Roux, Peter C.; McGeoch, Melodie A.	Rapid range expansion and community reorganization in response to warming	GLOBAL CHANGE BIOLOGY	14	2950	10.1111/j.1365-2486.2008.01687.x	2008	1354-1013
Oguz, Temel; Fach, Bettina; Salihoglu, Baris	Invasion dynamics of the alien ctenophore Mnemiopsis leidyi and its impact on anchovy collapse in the Black Sea	JOURNAL OF PLANKTON RESEARCH	30	1385	10.1093/plankt/fbn094	2008	0142-7873
Roohi, Abolghasem; Yasin, Zulfigar; Kideys, Ahmet E.; Hwai, Aileen Tan Shau; Khanari, Ali Ganjian; Eker-Develi, Elif	Impact of a new invasive ctenophore (Mnemiopsis leidyi) on the zooplankton community of the Southern Caspian sea	MARINE ECOLOGY-AN EVOLUTIONARY PERSPECTIVE	29	421	10.1111/j.1439-0485.2008.00254.x	2008	0173-9565
Moore, Aubrey; Miller, Ross H.	Daphnis nerii (Lepidoptera: Sphingidae), a New Pest of Oleander on Guam, Including Notes on Plant Hosts and Egg Parasitism	Proceedings of the Hawaiian Entomological Society	40	67		2008	0073-134X
Esteves, F. A.; Caliman, A.; Santangelo, J. M.; Guariento, R. D.; Farjalla, V. F.; Bozelli, R. L.	Neotropical coastal lagoons: An appraisal of their biodiversity, functioning, threats and conservation management	BRAZILIAN JOURNAL OF BIOLOGY	68	967		2008	1519-6984
Molnar, Jennifer L.; Gamboa, Rebecca L.; Revenga, Carmen; Spalding, Mark D.	Assessing the global threat of invasive species to marine biodiversity	FRONTIERS IN ECOLOGY AND THE ENVIRONMENT	6	485	10.1890/070064	2008	1540-9295
Salo, Palvi; Nordstrom, Mikael; Thomson, Robert L.; Korpimaki, Erkki	Risk induced by a native top predator reduces alien mink movements	JOURNAL OF ANIMAL ECOLOGY	77	1092	10.1111/j.1365-2656.2008.01430.x	2008	0021-8790
Yu, Hua; Yu, Fei-Hai; Miao, Shi-Li; Dong, Ming	Holoparasitic Cuscuta campestris suppresses invasive Mikania micrantha and contributes to native community recovery	BIOLOGICAL CONSERVATION	141	2653	10.1016/j.biocon.2008.08.002	2008	0006-3207
Potts, Daniel L.; Harpole, W. Stanley; Goulden, Michael L.; Suding, Katharine Nash	The impact of invasion and subsequent removal of an exotic thistle, Cynara cardunculus, on CO(2) and H(2)O vapor exchange in a coastal California grassland	BIOLOGICAL INVASIONS	10	1073	10.1007/s10530-007-9185-y	2008	1387-3547
Davis, Naomi E.; O'Dowd, Dennis J.; Green, Peter T.; Mac Nally, Ralph	Effects of an Alien Ant Invasion on Abundance, Behavior, and Reproductive Success of Endemic Island Birds	CONSERVATION BIOLOGY	22	1165	10.1111/j.1523-1739.2008.00984.x	2008	0888-8892
Munari, Cristina	Effects of the exotic invader Musculista senhousia on benthic communities of two Mediterranean lagoons	HYDROBIOLOGIA	611	29	10.1007/s10750-008-9459-0	2008	0018-8158
Wright, Jeffrey I.; Gribben, Paul E.	Predicting the impact of an invasive seaweed on the fitness of native fauna	JOURNAL OF APPLIED ECOLOGY	45	1540	10.1111/j.1365-2664.2008.01541.x	2008	0021-8901
Kochmann, Judith; Buschbaum, Christian; Volkenborn, Nils; Reise, Karsten	Shift from native mussels to alien oysters: Differential effects of ecosystem engineers	JOURNAL OF EXPERIMENTAL MARINE BIOLOGY AND ECOLOGY	364	1	10.1016/j.jembe.2008.05.015	2008	0022-0981
Bartomeus, Ignasi; Bosch, Jordi; Vila, Montserrat	High invasive pollen transfer, yet low deposition on native stigmas in a Carpobrotus-invaded community	ANNALS OF BOTANY	102	417	10.1093/aob/mcn109	2008	0305-7364
Aldridge, D. C.; Salazar, M.; Serna, A.; Cock, J.	Density-dependent effects of a new invasive false mussel, Mytilopsis trautwineana (Tryon 1866), on shrimp, Litopenaeus vannamei (Boone 1931), aquaculture in Colombia	AQUACULTURE	281	34	10.1016/j.aquaculture.2008.05.022	2008	0044-8486
Schumacher, Eva; Kueffer, Christoph; Tobler, Monika; Gmuer, Veronika; Edwards, Peter J.; Dietz, Hansjoerg	Influence of drought and shade on seedling growth of native and invasive trees in the Seychelles	BIOTROPICA	40	543	10.1111/j.1744-7429.2008.00407.x	2008	0006-3606
Mason, T. J.; French, K.	Impacts of a woody invader vary in different vegetation communities	DIVERSITY AND DISTRIBUTIONS	14	829	10.1111/j.1472-4642.2008.00493.x	2008	1366-9516
Fey, Karen; Banks, Peter B.; Korpimaki, Erkki	Voles on small islands: effects of food limitation and alien predation	OECOLOGIA	157	419	10.1007/s00442-008-1084-0	2008	0029-8549
Tsiamis, Konstantinos; Panayotidis, Panayotis; Zenetos, Argyro	Alien marine macrophytes in Greece: a review	BOTANICA MARINA	51	237	10.1515/BOT.2008.040	2008	0006-8055
Blanchet, Simon; Loot, Geraldine; Bernatchez, Louis; Dodson, Julian J.	The effects of abiotic factors and intraspecific versus interspecific competition on the diel activity patterns of Atlantic salmon (Salmo salar) fry	CANADIAN JOURNAL OF FISHERIES AND AQUATIC SCIENCES	65	1545	10.1139/F08-079	2008	0706-652X
Lambrinos, John G.; Bando, K. Jun	Habitat modification inhibits conspecific seedling recruitment in populations of an invasive ecosystem engineer	BIOLOGICAL INVASIONS	10	729	10.1007/s10530-007-9165-2	2008	1387-3547
Pyke, Christopher R.; Thomas, Roxanne; Porter, Read D.; Hellmann, Jessica J.; Dukes, Jeffrey S.; Lodge, David M.; Chavarria, Gabriela	Current practices and future opportunities for policy on climate change and invasive species	CONSERVATION BIOLOGY	22	585	10.1111/j.1523-1739.2008.00956.x	2008	0888-8892
Vazquez-Luis, M.; Sanchez-Jerez, P.; Bayle-Sempere, J. T.	Changes in amphipod (Crustacea) assemblages associated with shallow-water algal habitats invaded by Caulerpa racemosa var. cylindracea in the western Mediterranean Sea	MARINE ENVIRONMENTAL RESEARCH	65	416	10.1016/j.marenvres.2008.01.006	2008	0141-1136
Liao, Cheng Zhang; Luo, Yi Qi; Fang, Chang Ming; Chen, Jia Kuan; Li, Bo	Litter pool sizes, decomposition, and nitrogen dynamics in Spartina alterniflora-invaded and native coastal marshlands of the Yangtze Estuary	OECOLOGIA	156	589	10.1007/s00442-008-1007-0	2008	0029-8549
Neves, Carolina Somaio; da Rocha, Rosana Moreira	Introduced and cryptogenic species and their management in Paranagua Bay, Brazil	BRAZILIAN ARCHIVES OF BIOLOGY AND TECHNOLOGY	51	623	10.1590/S1516-89132008000300025	2008	1516-8913
Lohrer, Andrew M.; Chiaroni, Luca D.; Hewitt, Judi E.; Thrush, Simon F.	Biogenic disturbance determines invasion success in a subtidal soft-sediment system	ECOLOGY	89	1299	10.1890/07-0421.1	2008	0012-9658
Rodil, Ivan F.; Olabarria, Celia; Lastra, Mariano; Lopez, Jesus	Differential effects of native and invasive algal wrack on macrofaunal assemblages inhabiting exposed sandy beaches	JOURNAL OF EXPERIMENTAL MARINE BIOLOGY AND ECOLOGY	358	1	10.1016/j.jembe.2007.12.030	2008	0022-0981
Cox, Robert D.; Allen, Edith B.	Stability of exotic annual grasses following restoration efforts in southern California coastal sage scrub	JOURNAL OF APPLIED ECOLOGY	45	495	10.1111/j.1365-2664.2007.01437.x	2008	0021-8901
Kurle, Carolyn M.; Croll, Donald A.; Tershy, Bernie R.	Introduced rats indirectly change marine rocky intertidal communities from algae- to invertebrate-dominated	PROCEEDINGS OF THE NATIONAL ACADEMY OF SCIENCES OF THE UNITED STATES OF AMERICA	105	3800	10.1073/pnas.0800570105	2008	0027-8424
Hollebone, Amanda L.; Hay, Mark E.	An invasive crab alters interaction webs in a marine community	BIOLOGICAL INVASIONS	10	347	10.1007/s10530-007-9134-9	2008	1387-3547
Aguraiuja, Ruth; Zobel, Martin; Zobel, Kristjan; Moora, Mari	Conservation of the endemic fern lineage Diellia (aspleniaceae) on the Hawaiian Islands: Can population structure indicate regional dynamics and endangering factors?	FOLIA GEOBOTANICA	43	3	10.1007/s12224-008-9001-1	2008	1211-9520
Stanley, Jean-Daniel; Bernasconi, Maria Pia; Jorstad, Thomas E.	Pelusium, an ancient port fortress on Egypt's Nile Delta coast: Its evolving environmental setting from foundation to demise	JOURNAL OF COASTAL RESEARCH	24	451	10.2112/07A-0021.1	2008	0749-0208
Hanekom, Nicholas	Invasion of an indigenous Perna perna mussel bed on the south coast of South Africa by an alien mussel Mytilus galloprovincialis and its effect on the associated fauna	BIOLOGICAL INVASIONS	10	233	10.1007/s10530-007-9125-x	2008	1387-3547
Jones, Holly P.; Tershy, Bernie R.; Zavaleta, Erika S.; Croll, Donald A.; Keitt, Bradford S.; Finkelstein, Myra E.; Howald, Gregg R.	Severity of the effects of invasive rats on seabirds: A global review	CONSERVATION BIOLOGY	22	16	10.1111/j.1523-1739.2007.00859.x	2008	0888-8892
Antolic, Boris; Zuljevic, Ante; Despalatovic, Marija; Grubelic, Ivana; Cvitkovic, Ivan	Impact of the invasive green alga Caulerpa racemosa var. cylindracea on the epiphytic macroalgal assemblage of Posidonia oceanica seagrass rhizomes in the Adriatic Sea	NOVA HEDWIGIA	86	155	10.1127/0029-5035/2008/0086-0155	2008	0029-5035
Zhou Hong-Xia; Liu Jin-E; Zhou Jun; Qin Pei	Effect of an alien species Spartina alterniflora Loisel on biogeochemical processes of intertidal ecosystem in the Jiangsu coastal region, China	PEDOSPHERE	18	77	10.1016/S1002-0160(07)60105-2	2008	1002-0160
Robinson, Tamara B.; Branch, George M.; Griffiths, Charles L.; Govender, Anesh	Resilience and elasticity of intertidal communities in response to harvesting of the alien mussel Mytilus galloprovincialis	JOURNAL OF EXPERIMENTAL MARINE BIOLOGY AND ECOLOGY	354	169	10.1016/j.jembe.2007.11.002	2008	0022-0981
Bruschetti, Martin; Luppi, Tomas; Fanjul, Eugenia; Rosenthal, Alan; Iribarne, Oscar	Grazing effect of the invasive reef-forming polychaete Ficopomatus enigmaticus (Fauvel) on phytoplankton biomass in a SW Atlantic coastal lagoon	JOURNAL OF EXPERIMENTAL MARINE BIOLOGY AND ECOLOGY	354	212	10.1016/j.jembe.2007.11.009	2008	0022-0981
Zhou Weidong; Yang Yang; Dong Danpeng	The calculation of the circulation in South China Sea by a diagnostic model	ACTA Oceanologica Sinica	27	31		2008
van der Meeren, Gro I.; Chandrapavan, Arani; Breithaupt, Thomas	Sexual and aggressive interactions in a mixed species group of lobsters Homarus gammarus and H-americanus	AQUATIC BIOLOGY	2	191	10.3354/ab00050	2008	1864-7790
Kosarev, Aleksey N.; Kostianoy, Andrey G.	Introduction	Black Sea Environment	5Q	1	10.1007/698_5_092	2008	1433-6863(print)
Kosarev, Aleksey N.; Kostianoy, Andrey G.; Shiganova, Tamara A.	The Sea of Azov	Handbook of Environmental Chemistry	5Q	63	10.1007/698_5_091	2008	1433-6863(print)
Shiganova, Tamara	Introduced species	Handbook of Environmental Chemistry	5Q	375	10.1007/698_5_066	2008	1433-6863(print)
Krassoi, Frederick R.; Brown, Kenneth R.; Bishop, Melanie J.; Kelaher, Brendan P.; Summerhayes, Stephen	Condition-specific competition allows coexistence of competitively superior exotic oysters with native oysters	JOURNAL OF ANIMAL ECOLOGY	77	5	10.1111/j.1365-2656.2007.01316.x	2008	0021-8790
Griffen, Blaine D.; Guy, Travis; Buck, Julia C.	Inhibition between invasives: a newly introduced predator moderates the impacts of a previously established invasive predator	JOURNAL OF ANIMAL ECOLOGY	77	32	10.1111/j.1365-2656.2007.01304.x	2008	0021-8790
Ozturk, Bayrarn; Baseren, Sertac Hami	The exlusive economic zone debates and fisheries in the Eastern Mediterranean Sea	Journal of the Black Sea Mediterranean Environment	14	77		2008
von der Meden, Charles E. O.; Porri, Francesca; Erlandsson, Johan; McQuaid, Christopher D.	Coastline topography affects the distribution of indigenous and invasive mussels	MARINE ECOLOGY PROGRESS SERIES	372	135	10.3354/meps07731	2008	0171-8630
Branch, George M.; Odendaal, Francois; Robinson, Tamara B.	Long-term monitoring of the arrival, expansion and effects of the alien mussel Mytilus galloprovincialis relative to wave action	MARINE ECOLOGY PROGRESS SERIES	370	171	10.3354/meps07626	2008	0171-8630
강재광	Island Protection Tactics(海島入保策) of Choi's Political Power(崔氏政權)and Strategy Islands(戰略海島) in the War against Mongol	military history	66	27		2008	1598-317X
Turk, Tom; Frangez, Robert; Sepcic, Kristina	Mechanisms of toxicity of 3-alkylpyridinium polymers from marine sponge Reniera sarai	MARINE DRUGS	5	157	10.3390/MD504157	2007	1660-3397
Neira, Carlos; Levin, Lisa A.; Grosholz, Edwin D.; Mendoza, Guillermo	Influence of invasive Spartina growth stages on associated macrofaunal communities	BIOLOGICAL INVASIONS	9	975	10.1007/s10530-007-9097-x	2007	1387-3547
Fausch, K. D.	Introduction, establishment and effects of non-native salmonids: considering the risk of rainbow trout invasion in the United Kingdom	JOURNAL OF FISH BIOLOGY	71	1	10.1111/j.1095-8649.2007.01682.x	2007	0022-1112
Klaus, Nathan; Keyes, Tim	Effect of two native invasive tree species on upland pine breeding bird communities in Georgia	WILSON JOURNAL OF ORNITHOLOGY	119	737	10.1676/06-125.1	2007	1559-4491
Hietanen, Susanna; Laine, Ari O.; Lukkari, Kaanina	The complex effects of the invasive polychaetes Marenzelleria spp. on benthic nutrient dynamics	JOURNAL OF EXPERIMENTAL MARINE BIOLOGY AND ECOLOGY	352	89	10.1016/j.jembe.2007.07.018	2007	0022-0981
Georgiev, B. B.; Sanchez, M. I.; Vasileva, G. P.; Nikolov, P. N.; Green, A. J.	Cestode parasitism in invasive and native brine shrimps (Artemia spp.) as a possible factor promoting the rapid invasion of A-franciscana in the Mediterranean region	PARASITOLOGY RESEARCH	101	1647	10.1007/s00436-007-0708-3	2007	0932-0113
Chiba, Satoshi	Morphological and ecological shifts in a land snail caused by the impact of an introduced predator	ECOLOGICAL RESEARCH	22	884	10.1007/s11284-006-0330-3	2007	0912-3814
Hamner, R. M.; Freshwater, D. W.; Whitfield, P. E.	Mitochondrial cytochrome b analysis reveals two invasive lionfish species with strong founder effects in the western Atlantic	JOURNAL OF FISH BIOLOGY	71	214	10.1111/j.1095-8649.2007.01575.x	2007	0022-1112
Kelley, J.	The International Polar Year: A legacy of Sydney Chapman	Leading Edge	26	1298	10.1190/1.2794391	2007	0732-989X
Bhalla, R. S.	Do bio-shields affect tsunami inundation?	CURRENT SCIENCE	93	831		2007	0011-3891
Kimball, Matthew E.; Able, Kenneth W.	Nekton utilization of intertidal salt marsh creeks: Tidal influences in natural Spartina, invasive Phragmites, and marshes treated for Phragmites removal	JOURNAL OF EXPERIMENTAL MARINE BIOLOGY AND ECOLOGY	346	87	10.1016/j.jembe.2007.03.006	2007	0022-0981
Stephens, A. E. A.; Kriticos, D. J.; Leriche, A.	The current and future potential geographical distribution of the oriental fruit fly, Bactrocera dorsalis (Diptera : Tephritidae)	BULLETIN OF ENTOMOLOGICAL RESEARCH	97	369	10.1017/S0007485307005044	2007	0007-4853
Bonnaud, E.; Bourgeois, K.; Vidal, E.; Kayser, Y.; Tranchant, Y.; Legrand, J.	Feeding ecology of a feral cat population on a small Mediterranean island	JOURNAL OF MAMMALOGY	88	1074	10.1644/06-MAMM-A-031R2.1	2007	0022-2372
Mateos-Naranjo, Enrique; Redondo-Gomez, S.; Silva, J.; Santos, R.; Figueroa, M. E.	Effect of prolonged flooding on the invader Spartina densiflora Brong	JOURNAL OF AQUATIC PLANT MANAGEMENT	45	121		2007	0146-6623
Rodda, Gordon H.; Savidge, Julie A.	Biology and impacts of pacific island invasive species. 2. Boiga irregulatis, the Brown Tree Snake (Reptilia : Colubiridae)	PACIFIC SCIENCE	61	307	10.2984/1534-6188(2007)61[307:BAIOPI]2.0.CO;2	2007	0030-8870
Chen, Hulli; Li, Bo; Fang, Changming; Chen, Jiakuan; Wu, Jihua	Exotic plant influences soil nematode communities through litter input	SOIL BIOLOGY & BIOCHEMISTRY	39	1782	10.1016/j.soilbio.2007.02.011	2007	0038-0717
Barreto, Cintia F.; Da Luz, Cynthia F. P.; Baptista-Neto, Jose A.; Vilela, Claudia G.; Barth, Ortrud M.	Palynological analysis of a sediment core obtained in Guanabara Bay, Rio de Janeiro, Brazil	ANAIS DA ACADEMIA BRASILEIRA DE CIENCIAS	79	223		2007	0001-3765
Abbott, K. L.; Greaves, S. N. J.; Ritchie, P. A.; Lester, P. J.	Behaviourally and genetically distinct populations of an invasive ant provide insight into invasion history and impacts on a tropical ant community	BIOLOGICAL INVASIONS	9	453	10.1007/s10530-006-9052-2	2007	1387-3547
Reaser, Jamie K.; Meyerson, Laura A.; Cronk, Quentin; De Poorter, Maj; Eldrege, L. G.; Green, Edmund; Kairo, Moses; Latasi, Pepetua; Mack, Richard N.; Mauremootoo, John; O'Dowd, Dennis; Orapa, Warea; Sastroutomo, Soetikno; Saunders, Alan; Shine, Clare; Thrainsson, Sigurdur; Vaiutu, Leliua	Ecological and socioeconomic impacts of invasive alien species in island ecosystems	ENVIRONMENTAL CONSERVATION	34	98	10.1017/S0376892907003815	2007	0376-8929
Blanchet, S.; Loot, G.; Bernatchez, L.; Dodson, J. J.	The disruption of dominance hierarchies by a non-native species: an individual-based analysis	OECOLOGIA	152	569	10.1007/s00442-007-0668-4	2007	0029-8549
Parker, Ingrid M.; Gilbert, Gregory S.	When there is no escape: The effects of natural enemies on native, invasive, and noninvasive plants	ECOLOGY	88	1210	10.1890/06-1377	2007	0012-9658
Beuck, Lydia; Vertino, Agostina; Stepina, Elizaveta; Karolczak, Marek; Pfannkuche, Olaf	Skeletal response of Lophelia pertusa (Scleractinia) to bioeroding sponge infestation visualised with micro-computed tomography	FACIES	53	157	10.1007/s10347-006-0094-9	2007	0172-9179
Knowler, Duncan	Estimation of a stock-recruitment relationship for Black Sea anchovy (Engraulis encrasicolus) under the influence of nutrient enrichment and the invasive comb-jelly, Mnemiopsis leidyi	FISHERIES RESEARCH	84	275	10.1016/j.fishres.2006.11.003	2007	0165-7836
Mason, T. J.; French, K.	Management regimes for a plant invader differentially impact resident communities	BIOLOGICAL CONSERVATION	136	246	10.1016/j.biocon.2006.11.023	2007	0006-3207
Daskalov, Georgi M.; Mamedov, Elchin V.	Integrated fisheries assessment and possible causes for the collapse of anchovy kilka in the Caspian Sea	ICES JOURNAL OF MARINE SCIENCE	64	503	10.1093/icesjms/fsl047	2007	1054-3139
Jenkins, Richard K. B.; Andriafidison, Daudet; Razafimanahaka, H. Julie; Rabearivelo, Andriamanana; Razafindrakoto, Noromampiandra; Ratsimandresy, Zo; Andrianandrasana, Rabe H.; Razafimahatratra, Emilienne; Racey, Paul A.	Not rare, but threatened: the endemic Madagascar flying fox Pteropus rufus in a fragmented landscape	ORYX	41	263	10.1017/S0030605307001883	2007	0030-6053
Barton, Jane; Fowler, Simon V.; Gianotti, Alison F.; Winks, Chris J.; de Beurs, Maarten; Arnold, Greg C.; Forrester, Guy	Successful biological control of mist flower (Ageratina riparia) in New Zealand: Agent establishment, impact and benefits to the native flora	BIOLOGICAL CONTROL	40	370	10.1016/j.biocontrol.2006.09.010	2007	1049-9644
He, Wenshan; Feagin, Rusty; Lu, Jianjian; Liu, Wenliang; Yan, Qian; Xie, Zhifa	Impacts of introduced Spartina alterniflora along an elevation gradient at the Jiuduansha Shoals in the Yangtze Estuary, suburban Shanghai, China	ECOLOGICAL ENGINEERING	29	245	10.1016/j.ecoleng.2006.08.004	2007	0925-8574
Strayer, David L.; Malcom, Heather M.	Effects of zebra mussels (Dreissena polymorpha) on native bivalves: the beginning of the end or the end of the beginning?	JOURNAL OF THE NORTH AMERICAN BENTHOLOGICAL SOCIETY	26	111	10.1899/0887-3593(2007)26[111:EOZMDP]2.0.CO;2	2007	0887-3593
Schmidt, Allison L.; Scheibling, Robert E.	Effects of native and invasive macroalgal canopies on composition and abundance of mobile benthic macrofauna and turf-forming algae	JOURNAL OF EXPERIMENTAL MARINE BIOLOGY AND ECOLOGY	341	110	10.1016/j.jembe.2006.10.003	2007	0022-0981
Bonesi, Laura; Palazon, Santiago	The American mink in Europe: Status, impacts, and control	BIOLOGICAL CONSERVATION	134	470	10.1016/j.biocon.2006.09.006	2007	0006-3207
Brusati, Elizabeth D.; Grosholz, Edwin D.	Effect of native and invasive cordgrass on Macoma petalum density, growth, and isotopic signatures	ESTUARINE COASTAL AND SHELF SCIENCE	71	517	10.1016/j.ecss.2006.08.026	2007	0272-7714
Briggs, John C.	Marine biogeography and ecology: invasions and introductions	JOURNAL OF BIOGEOGRAPHY	34	193	10.1111/j.1365-2699.2006.01632.x	2007	0305-0270
Williams, Susan L.; Smith, Jennifer E.	A global review of the distribution, taxonomy, and impacts of introduced seaweeds	ANNUAL REVIEW OF ECOLOGY EVOLUTION AND SYSTEMATICS	38	327	10.1146/annurev.ecolsys.38.091206.095543	2007	1543-592X
Mason, T. J.; French, K.; Russell, K. G.	Moderate impacts of plant invasion and management regimes in coastal hind dune seed banks	BIOLOGICAL CONSERVATION	134	428	10.1016/j.biocon.2006.08.032	2007	0006-3207
Devin, Simon; Beisel, Jean-Nicolas	Biological and ecological characteristics of invasive species: a gammarid study	BIOLOGICAL INVASIONS	9	13	10.1007/s10530-006-9001-0	2007	1387-3547
Whitfield, Paula E.; Hare, Jonathan A.; David, Andrew W.; Harter, Stacey L.; Munoz, Roldan C.; Addison, Christine M.	Abundance estimates of the Indo-Pacific lionfish Pterois volitans/miles complex in the Western North Atlantic	BIOLOGICAL INVASIONS	9	53	10.1007/s10530-006-9005-9	2007	1387-3547
Coleman, Heather M.; Levine, Jonathan M.	Mechanisms underlying the impacts of exotic annual grasses in a coastal California meadow	BIOLOGICAL INVASIONS	9	65	10.1007/s10530-006-9008-6	2007	1387-3547
Schaffelke, Britta; Hewitt, Chad L.	Impacts of introduced seaweeds	BOTANICA MARINA	50	397	10.1515/BOT.2007.044	2007	0006-8055
Melbourne, Brett A.; Cornell, Howard V.; Davies, Kendi F.; Dugaw, Christopher J.; Elmendorf, Sarah; Freestone, Amy L.; Hall, Richard J.; Harrison, Susan; Hastings, Alan; Holland, Matt; Holyoak, Marcel; Lambrinos, John; Moore, Kara; Yokomizo, Hiroyuki	Invasion in a heterogeneous world: resistance, coexistence or hostile takeover?	ECOLOGY LETTERS	10	77	10.1111/j.1461-0248.2006.00987.x	2007	1461-023X
Wootton, Louise	First report of Carex macrocephala in eastern North America with notes on its co-occurrence with Carex kobomugi in New Jersey	JOURNAL OF THE TORREY BOTANICAL SOCIETY	134	126	10.3159/1095-5674(2007)134[126:FROCMI]2.0.CO;2	2007	1095-5674
Thomsen, Mads S.; Wernberg, Thomas; Staehr, Peter; Krause-Jensen, Dorte; Risgaard-Petersen, Nils; Silliman, Brian R.	Alien macroalgae in Denmark - a broad-scale national perspective	MARINE BIOLOGY RESEARCH	3	61	10.1080/17451000701213413	2007	1745-1000
Martin, Sophie; Thouzeau, Gerard; Richard, Marion; Chauvaud, Laurent; Jean, Frederic; Clavier, Jacques	Benthic community respiration in areas impacted by the invasive mollusk Crepidula fornicata	MARINE ECOLOGY PROGRESS SERIES	347	51	10.3354/meps07000	2007	0171-8630
Page, Henry M.; Dugan, Jenifer E.; Schroeder, Donna M.; Nishimoto, Mary M.; Love, Milton S.; Hoesterey, Justin C.	Trophic links and condition of a temperate reef fish: comparisons among offshore oil platform and natural reef habitats	MARINE ECOLOGY PROGRESS SERIES	344	245	10.3354/meps06929	2007	0171-8630
Kimmerer, W. J.	Response of anchovies dampens effects of the invasive bivalve Corbula amurensis on the San Francisco Estuary foodweb (vol 324, pg 207, 2006)	MARINE ECOLOGY PROGRESS SERIES	343	308		2007	0171-8630
Brousseau, Diane J.; Goldberg, Ronald	Effect of predation by the invasive crab Hemigrapsus sanguineus on recruiting barnacles Semibalanus balanoides in western Long Island Sound, USA	MARINE ECOLOGY PROGRESS SERIES	339	221	10.3354/meps339221	2007	0171-8630
Ruesink, Jennifer L.	Biotic resistance and facilitation of a non-native oyster on rocky shores	MARINE ECOLOGY PROGRESS SERIES	331	1	10.3354/meps331001	2007	0171-8630
Rossell, C. Reed, Jr.; Patch, Steven; Salmons, Susan	Effects of deer browsing on native and non-native vegetation in a mixed oak-beech forest on the Atlantic coastal plain	NORTHEASTERN NATURALIST	14	61	10.1656/1092-6194(2007)14[61:EODBON]2.0.CO;2	2007	1092-6194
	Predation in Organisms: Distinct Phenomenon	Predation in Organisms: Distinct Phenomenon				2007
Baret, Stephane; Le Bourgeois, Thomas; Riviere, Jean-Noel; Pailler, Thierry; Sarrailh, Jean-Michel; Strasberg, Dominique	Can species richness be maintained in logged endemic Acacia heterophylla forests (Reunion Island, Indian Ocean)?	REVUE D ECOLOGIE-LA TERRE ET LA VIE	62	273		2007	0249-7395
Pine, William E., III; Kwak, Thomas J.; Rice, James A.	Modeling management scenarios and the effects of an introduced apex predator on a coastal riverine fish community	TRANSACTIONS OF THE AMERICAN FISHERIES SOCIETY	136	105	10.1577/T05-249.1	2007	0002-8487
Duncan, Richard P.; Forsyth, David M.	Modelling population persistence on islands: mammal introductions in the New Zealand archipelago	PROCEEDINGS OF THE ROYAL SOCIETY B-BIOLOGICAL SCIENCES	273	2969	10.1098/rspb.2006.3662	2006	0962-8452
Beadell, Jon S.; Ishtiaq, Farah; Covas, Rita; Melo, Martim; Warren, Ben H.; Atkinson, Carter T.; Bensch, Staffan; Graves, Gary R.; Jhala, Yadvendradev V.; Peirce, Mike A.; Rahmani, Asad R.; Fonseca, Dina M.; Fleischer, Robert C.	Global phylogeographic limits of Hawaii's avian malaria	PROCEEDINGS OF THE ROYAL SOCIETY B-BIOLOGICAL SCIENCES	273	2935	10.1098/rspb.2006.3671	2006	0962-8452
Valtonen, Anu; Jantunen, Juha; Saarinen, Kimmo	Flora and lepidoptera fauna adversely affected by invasive Lupinus polyphyllus along road verges	BIOLOGICAL CONSERVATION	133	389	10.1016/j.biocon.2006.06.015	2006	0006-3207
Thieltges, David W.; Strasser, Matthias; Reise, Karsten	How bad are invaders in coastal waters? The case of the American slipper limpet Crepidula fornicata in western Europe	BIOLOGICAL INVASIONS	8	1673	10.1007/s10530-005-5279-6	2006	1387-3547
Goecker, M. E.; Valentine, J. F.; Sklenar, S. A.	Effects of exotic submerged aquatic vegetation on waterfowl in the Mobile-Tensaw Delta	Gulf of Mexico Science	24	68		2006	1087-688X
Singh, A. K.; Lakra, W. S.	Alien fish species in India: Impact and emerging scenario	Journal of Ecophysiology and Occupational Health	6	165		2006	0972-4397
Hilton, Mike; Harvey, Nick; Hart, Andrew; James, Kris; Arbuckle, Chris	The impact of exotic dune grass species on foredune development in Australia and New Zealand: a case study of Ammophila arenaria and Thinopyrum junceiforme	AUSTRALIAN GEOGRAPHER	37	313	10.1080/00049180600954765	2006	0004-9182
Mamedov, Elchin V.	The biology and abundance of kilka (Clupeonella spp.) along the coast of Azerbaijan, Caspian Sea	ICES JOURNAL OF MARINE SCIENCE	63	1665	10.1016/j.icesjms.2006.07.005	2006	1054-3139
Pysek, Petr; Richardson, David M.; Jarosik, Vojtech	Who cites who in the invasion zoo: insights from an analysis of the most highly cited papers in invasion ecology	PRESLIA	78	437		2006	0032-7786
Roman, Joe	Diluting the founder effect: cryptic invasions expand a marine invader's range	PROCEEDINGS OF THE ROYAL SOCIETY B-BIOLOGICAL SCIENCES	273	2453	10.1098/rspb.2006.3597	2006	0962-8452
Schaffelke, Britta; Smith, Jennifer E.; Hewitt, Chad L.	Introduced macroalgae - a growing concern	JOURNAL OF APPLIED PHYCOLOGY	18	529	10.1007/s10811-006-9074-2	2006	0921-8971
Elkinton, Joseph S.; Parry, Dylan; Boettner, George H.	Implicating an introduced generalist parasitoid in the invasive browntail moth's enigmatic demise	ECOLOGY	87	2664	10.1890/0012-9658(2006)87[2664:IAIGPI]2.0.CO;2	2006	0012-9658
Underwood, E. C.; Mulitsch, M. J.; Greenberg, J. A.; Whiting, M. L.; Ustin, S. L.; Kefauver, S. C.	Mapping invasive aquatic vegetation in the Sacramento-San Joaquin Delta using hyperspectral imagery	ENVIRONMENTAL MONITORING AND ASSESSMENT	121	47	10.1007/s10661-005-9106-4	2006	0167-6369
Zardi, G. I.; Nicastro, K. R.; McQuaid, C. D.; Rius, M.; Porri, F.	Hydrodynamic stress and habitat partitioning between indigenous (Perna perna) and invasive (Mytilus galloprovincialis) mussels: constraints of an evolutionary strategy	MARINE BIOLOGY	150	79	10.1007/s00227-006-0328-y	2006	0025-3162
Neill, P. E.; Alcalde, O.; Faugeron, S.; Navarrete, S. A.; Correa, J. A.	Invasion of Codium fragile ssp tomentosoides in northern Chile: A new threat for Gracilaria farming	AQUACULTURE	259	202	10.1016/j.aquaculture.2006.05.009	2006	0044-8486
Martin, Sophie; Thouzeau, Gerard; Chauvaud, Laurent; Jean, Frederic; Guerin, Laurent; Clavier, Jacques	Respiration, calcification, and excretion of the invasive slipper limpet, Crepidula fornicata L.: Implications for carbon, carbonate, and nitrogen fluxes in affected areas	LIMNOLOGY AND OCEANOGRAPHY	51	1996		2006	0024-3590
Thomsen, Meredith A.; Corbin, Jeffrey D.; D'Antonio, Carla M.	The effect of soil nitrogen on competition between native and exotic perennial grasses from northern coastal California	PLANT ECOLOGY	186	23	10.1007/s11258-006-9109-4	2006	1385-0237
Wetterer, James K.; Espadaler, Xavier; Wetterer, Andrea L.; Aguin-Pombo, Dora; Franquinho-Aguiar, Antonio M.	Long-term impact of exotic ants on the native ants of Madeira	ECOLOGICAL ENTOMOLOGY	31	358	10.1111/j.1365-2311.2006.00790.x	2006	0307-6946
Gribben, Paul E.; Wright, Jeffrey T.	Sublethal effects on reproduction in native fauna: are females more vulnerable to biological invasion?	OECOLOGIA	149	352	10.1007/s00442-006-0452-x	2006	0029-8549
Fresard, Marjolaine; Boncoeur, Jean	Costs and benefits of stock enhancement and biological invasion control: the case of the Bay of Brest scallop fishery	AQUATIC LIVING RESOURCES	19	299	10.1051/alr:2006031	2006	0990-7440
Streftaris, N.; Zenetos, A.	Alien Marine Species in the Mediterranean - the 100 'Worst Invasives' and their Impact	MEDITERRANEAN MARINE SCIENCE	7	87		2006	1108-393X
Beisner, BE; Hovius, J; Hayward, A; Kolasa, J; Romanuk, TN	Environmental productivity and biodiversity effects on invertebrate community invasibility	BIOLOGICAL INVASIONS	8	655	10.1007/s10530-005-2061-8	2006	1387-3547
Ota, Hidetoshi; Hoshino, Isao; Sueyoshi, Toyofumi	Colonization by the subtropical lizard, Japalura polygonata polygonata (Squamata : Agamidae), in southeastern Kyushu, Japan	Current Herpetology	25	29	10.3105/1345-5834(2006)25[29:CBTSLJ]2.0.CO;2	2006	1345-5834
Lambdon, Philip W.; Hulme, Philip E.	How strongly do interactions with closely-related native species influence plant invasions? Darwin's naturalization hypothesis assessed on Mediterranean islands	JOURNAL OF BIOGEOGRAPHY	33	1116	10.1111/j.1365-2699.2006.01486.x	2006	0305-0270
Shiell, GR	Effect of invasive tagging on the activity of Holothuria whitmaei [Echinodermata : Holothuroidea]: A suitable mark-recapture method for short-term field studies of holothurian behaviour	MARINE AND FRESHWATER BEHAVIOUR AND PHYSIOLOGY	39	153	10.1080/10236240600688789	2006	1023-6244
Miller, Aroha; Inglis, Graeme J.; Poulin, Robert	Comparison of the ectosymbionts and parasites of an introduced crab, Charybdis japonica, with sympatric and allopatric populations of a native New Zealand crab, Ovalipes catharus (Brachyura : Portunidae)	NEW ZEALAND JOURNAL OF MARINE AND FRESHWATER RESEARCH	40	369		2006	0028-8330
Smith, KG	Keystone predators (eastern newts, Notophthalmus viridescens) reduce the impacts of an aquatic invasive species	OECOLOGIA	148	342	10.1007/s00442-006-0370-y	2006	0029-8549
Gosper, Carl R.; Whelan, R. J.; French, K.	The effect of invasive plant management on the rate of removal of vertebrate-dispersed fruits	PLANT ECOLOGY	184	351	10.1007/s11258-005-9078-z	2006	1385-0237
Caldwell, BA	Effects of invasive scotch broom on soil properties in a Pacific coastal prairie soil	APPLIED SOIL ECOLOGY	32	149	10.1016/j.apsoil.2004.11.008	2006	0929-1393
Hacker, SD; Dethier, MN	Community modification by a grass invader has differing impacts for marine habitats	OIKOS	113	279		2006	0030-1299
Inderjit; Chapman, David; Ranelletti, Marla; Kaushik, Shalini	Invasive marine algae: An ecological perspective	BOTANICAL REVIEW	72	153	10.1663/0006-8101(2006)72[153:IMAAEP]2.0.CO;2	2006	0006-8101
Gratton, C; Denno, RF	Arthropod food web restoration following removal of an invasive wetland plant	ECOLOGICAL APPLICATIONS	16	622	10.1890/1051-0761(2006)016[0622:AFWRFR]2.0.CO;2	2006	1051-0761
Domenech, R; Vila, M; Gesti, J; Serrasolses, I	Neighbourhood association of Cortaderia selloana invasion, soil properties and plant community structure in Mediterranean coastal grasslands	ACTA OECOLOGICA-INTERNATIONAL JOURNAL OF ECOLOGY	29	171	10.1016/j.actao.2005.09.004	2006	1146-609X
Ruesink, JL; Collado-Vides, L	Modeling the increase and control of Caulerpa taxifolia, an invasive marine macroalga	BIOLOGICAL INVASIONS	8	309	10.1007/s10530-004-8060-3	2006	1387-3547
Gust, N; Inglis, GJ	Adaptive multi-scale sampling to determine an invasive crab's habitat usage and range in New Zealand	BIOLOGICAL INVASIONS	8	339	10.1007/s10530-004-8243-y	2006	1387-3547
Zamith, LR; Scarano, FR	Restoration of a restinga sandy coastal plain in Brazil: Survival and growth of planted woody species	RESTORATION ECOLOGY	14	87	10.1111/j.1526-100X.2006.00108.x	2006	1061-2971
Thomsen, MA; D'Antonio, CM; Suttle, KB; Sousa, WP	Ecological resistance, seed density and their interactions determine patterns of invasion in a California coastal grassland	ECOLOGY LETTERS	9	160	10.1111/j.1461-0248.2005.00857.x	2006	1461-023X
Buschbaum, C; Chapman, AS; Saier, B	How an introduced seaweed can affect epibiota diversity in different coastal systems	MARINE BIOLOGY	148	743	10.1007/s00227-005-0128-9	2006	0025-3162
Lages, BG; Fleury, BG; Ferreira, CEL; Pereira, RC	Chemical defense of an exotic coral as invasion strategy	JOURNAL OF EXPERIMENTAL MARINE BIOLOGY AND ECOLOGY	328	127	10.1016/j.jembe.2005.07.011	2006	0022-0981
Kimmerer, W. J.	Response of anchovies dampens effects of the invasive bivalve Corbula amurensis on the San Francisco Estuary foodweb	MARINE ECOLOGY PROGRESS SERIES	324	207	10.3354/meps324207	2006	0171-8630
Sindermann, CJ	Coastal Pollution: Effects on Living Resources and Humans	Coastal Pollution: Effects on Living Resources and Humans				2006
Anonymous	Biological pollution: Invasions by alien species	Coastal Pollution: Effects on Living Resources and Humans		103		2006
Lee, Su See; Mansor, Patahayah; Koter, Rosdi; Lee, Don Koo	Effect of mycorrhizal treatment on growth of Acacia spp. on sandy BRIS soils in Peninsular Malaysia	Journal of Korean Forestry Society	95	516		2006	0445-4650
Nogales, M.; Rodriguez-Luengo, J. L.; Marrero, P.	Ecological effects and distribution of invasive non-native mammals on the Canary Islands	MAMMAL REVIEW	36	49	10.1111/j.1365-2907.2006.00077.x	2006	0305-1838
Page, Henry M.; Dugan, Jenifer E.; Culver, Carolynn S.; Hoesterey, Justin C.	Exotic invertebrate species on offshore oil platforms	MARINE ECOLOGY PROGRESS SERIES	325	101	10.3354/meps325101	2006	0171-8630
Finenko, Galina A.; Kideys, Ahmet E.; Anninsky, Boris E.; Shiganova, Tamara A.; Roohi, Abolghaseem; Tabari, Mojgan R.; Rostami, Hosseinali; Bagheri, Siamak	Invasive ctenophore Mnemiopsis leidyi in the Caspian Sea: feeding, respiration, reproduction and predatory impact on the zooplankton community	MARINE ECOLOGY PROGRESS SERIES	314	171	10.3354/meps314171	2006	0171-8630
	Monographiae Biologicae:MARITIME CANALS AS INVASION CORRIDORS	Monographiae Biologicae:MARITIME CANALS AS INVASION CORRIDORS	83			2006	0077-0639(print)
Qin, Pei; Liu, Jine; Zhou, Hongxiang	Positive and negative effects: Exotic spartina alterniflora in China	NEW DEVELOPMENTS IN ECOLOGY RESEARCH		187		2006
Tassin, J; Lavergne, C; Muller, S; Blanfort, V; Baret, S; Le Bourgeois, T; Triolo, J; Riviere, JN	Assessment of ecological consequences of plant invasions oil Reunion Island (Mascarene Archipelago, Indian Ocean)	REVUE D ECOLOGIE-LA TERRE ET LA VIE	61	35		2006	0249-7395
Peterson, Mark S.; Partyka, Melissa L.	Baseline mapping of Phragmites australis (Common reed) in three coastal Mississippi estuarine basins	SOUTHEASTERN NATURALIST	5	747	10.1656/1528-7092(2006)5[747:BMOPAC]2.0.CO;2	2006	1528-7092
Cinar, M. E.; Bilecenoglu, M.; Ozturk, B.; Katagan, T.; Aysel, V.	Alien species on the coasts of Turkey	MEDITERRANEAN MARINE SCIENCE	6	119		2005	1108-393X
Kahng, SE; Grigg, RW	Impact of an alien octocoral, Carijoa riisei, on black corals in Hawaii	CORAL REEFS	24	556	10.1007/s00338-005-0026-0	2005	0722-4028
Keeley, JE; Baer-Keeley, M; Fotheringham, CJ	Alien plant dynamics following fire in Mediterranean-climate California shrublands	ECOLOGICAL APPLICATIONS	15	2109	10.1890/04-1222	2005	1051-0761
Callaway, JC	The challenge of restoring functioning salt marsh ecosystems	JOURNAL OF COASTAL RESEARCH		24		2005	0749-0208
Coyle, DR; Booth, DC; Wallace, MS	Ambrosia beetle (Coleoptera : Scolytidae) species, flight, and attack on living eastern cottonwood trees	JOURNAL OF ECONOMIC ENTOMOLOGY	98	2049		2005	0022-0493
de Souza, JRB; da Rocha, CMC; de Lima, MDPR	Occurrence of exotic bivalve Mytilopsis leucophaeta (Conrad) (Mollusca, Bivalvia), in Brazil	REVISTA BRASILEIRA DE ZOOLOGIA	22	1204		2005	0101-8175
Dudas, SE; McGaw, LJ; Dower, JF	Selective crab predation on native and introduced bivalves in British Columbia	JOURNAL OF EXPERIMENTAL MARINE BIOLOGY AND ECOLOGY	325	8	10.1016/j.jembe.2005.04.015	2005	0022-0981
Petillon, J; Ysnel, F; Canard, A; Lefeuvre, JC	Impact of an invasive plant (Elymus athericus) on the conservation value of tidal salt marshes in western France and implications for management: Responses of spider populations	BIOLOGICAL CONSERVATION	126	103	10.1016/j.biocon.2005.05.003	2005	0006-3207
Wootton, LS; Halsey, SD; Bevaart, K; McGough, A; Ondreicka, J; Patel, P	When invasive species have benefits as well as costs: Managing Carex kobomugi (Asiatic sand sedge) in New Jersey's coastal dunes	BIOLOGICAL INVASIONS	7	1017	10.1007/s10530-004-3124-y	2005	1387-3547
Chown, SL; Hull, B; Gaston, KJ	Human impacts, energy availability and invasion across Southern Ocean Islands	GLOBAL ECOLOGY AND BIOGEOGRAPHY	14	521	10.1111/j.1466-822x.2005.00173.x	2005	1466-822X
Sanchez, I; Fernandez, C	Impact of the invasive seaweed Sargassum muticum (Phaeophyta) on an intertidal macroalgal assemblage	JOURNAL OF PHYCOLOGY	41	923	10.1111/j.1529-8817.2005.00120.x	2005	0022-3646
Ragueneau, O; Chauvaud, L; Moriceau, B; Leynaert, A; Thouzeau, G; Donval, A; Le Loc'h, F; Jean, F	Biodeposition by an invasive suspension feeder impacts the biogeochemical cycle of Si in a coastal ecosystem (Bay of Brest, France)	BIOGEOCHEMISTRY	75	19	10.1007/s10533-004-5677-3	2005	0168-2563
Taylor, CM; Hastings, A	Allee effects in biological invasions	ECOLOGY LETTERS	8	895	10.1111/j.1461-0248.2005.00787.x	2005	1461-023X
Peirano, A; Damasso, V; Montefalcone, M; Morri, C; Bianchi, CN	Effects of climate, invasive species and anthropogenic impacts on the growth of the seagrass Posidonia oceanica (L.) Delile in Liguria (NW Mediterranean Sea)	MARINE POLLUTION BULLETIN	50	817	10.1016/j.marpolbul.2005.02.011	2005	0025-326X
Brown, JJ; Hildreth, R; Ford, SE	When the world is not your oyster	SCIENCE	309	244		2005	0036-8075
Chapman, MG; People, J; Blockley, D	Intertidal assemblages associated with natural corallina turf and invasive mussel beds	BIODIVERSITY AND CONSERVATION	14	1761	10.1007/s10531-004-0698-8	2005	0960-3115
Fargione, JE; Tilman, D	Diversity decreases invasion via both sampling and complementarity effects	ECOLOGY LETTERS	8	604	10.1111/j.1461-0248.2005.00753.x	2005	1461-023X
Gordina, AD; Zagorodnyaya, JA; Kideys, AE; Bat, L; Satilmis, HH	Summer ichthyoplankton, food supply of fish larvae and impact of invasive ctenophores on the nutrition of fish larvae in the Black Sea during 2000 and 2001	JOURNAL OF THE MARINE BIOLOGICAL ASSOCIATION OF THE UNITED KINGDOM	85	537	10.1017/S002531540501146X	2005	0025-3154
Wright, JT	Differences between native and invasive Caulerpa taxifolia: a link between asexual fragmentation and abundance in invasive populations	MARINE BIOLOGY	147	559	10.1007/s00227-005-1561-5	2005	0025-3162
Suehs, CM; Affre, L; Medail, F	Unexpected insularity effects in invasive plant mating systems: the case of Carpobrotus (Aizoaceae) taxa in the Mediterranean Basin	BIOLOGICAL JOURNAL OF THE LINNEAN SOCIETY	85	65	10.1111/j.1095-8312.2005.00473.x	2005	0024-4066
Steffani, CN; Branch, GM	Mechanisms and consequences of competition between an alien mussel, Mytilus galloprovincialis, and an indigenous limpet, Scutellastra argenvillei	JOURNAL OF EXPERIMENTAL MARINE BIOLOGY AND ECOLOGY	317	127	10.1016/j.jembe.2004.11.022	2005	0022-0981
Voisin, M; Engel, CR; Viard, F	Differential shuffling of native genetic diversity across introduced regions in a brown alga: Aquaculture vs. maritime traffic effects	PROCEEDINGS OF THE NATIONAL ACADEMY OF SCIENCES OF THE UNITED STATES OF AMERICA	102	5432	10.1073/pnas.0501754102	2005	0027-8424
Glasby, TM; Creese, RG; Gibson, PT	Experimental use of salt to control the invasive marine alga Caulerpa taxifolia in New South Wales, Australia	BIOLOGICAL CONSERVATION	122	573	10.1016/j.biocon.2004.09.012	2005	0006-3207
Sutherst, RW; Maywald, G	A climate model of the red imported fire ant, Solenopsis invicta Buren (Hymenoptera : Formicidae): Implications for invasion of new regions, particularly Oceania	ENVIRONMENTAL ENTOMOLOGY	34	317		2005	0046-225X
Nyberg, CD; Wallentinus, I	Can species traits be used to predict marine macroalgal introductions?	BIOLOGICAL INVASIONS	7	265	10.1007/s10530-004-0738-z	2005	1387-3547
McMaster, RT	Factors influencing vascular plant diversity on 22 islands off the coast of eastern North America	JOURNAL OF BIOGEOGRAPHY	32	475	10.1111/j.1365-2699.2004.01200.x	2005	0305-0270
Holway, DA	Edge effects of an invasive species across a natural ecological boundary	BIOLOGICAL CONSERVATION	121	561	10.1016/j.biocon.2004.06.005	2005	0006-3207
Hegaret, H; Wikfors, GH	Effects of natural and field-simulated blooms of the dinoflagellate Prorocentrum minimum upon hemocytes of eastern oysters, Crassostrea virginica, from two different populations	HARMFUL ALGAE	4	201	10.1016/j.hal.2003.12.005	2005	1568-9883
Cavas, L; Yurdakoc, K; Yokes, B	Antioxidant status of Lobiger serradifalci and Oxynoe olivacea (Opisthobranchia, Mollusca)	JOURNAL OF EXPERIMENTAL MARINE BIOLOGY AND ECOLOGY	314	227	10.1016/j.jembe.2004.09.003	2005	0022-0981
Ruesink, JL; Lenihan, HS; Trimble, AC; Heiman, KW; Micheli, F; Byers, JE; Kay, MC	Introduction of non-native oysters: Ecosystem effects and restoration implications	ANNUAL REVIEW OF ECOLOGY EVOLUTION AND SYSTEMATICS	36	643	10.1146/annurev.ecolsys.36.102003.152638	2005	1543-592X
Lorvelec, O; Pascal, M	French attempts to eradicate non-indigenous mammals and their consequences for native biota	BIOLOGICAL INVASIONS	7	135	10.1007/s10530-004-9643-8	2005	1387-3547
Mouillot, D; Gaillard, S; Aliaume, C; Verlaque, M; Belsher, T; Troussellier, M; Chi, TD	Ability of taxonomic diversity indices to discriminate coastal lagoon environments based on macrophyte communities	ECOLOGICAL INDICATORS	5	1	10.1016/j.ecolind.2004.04.004	2005	1470-160X
Bartlett, Karen H.; Duncan, Colleen; Bach, Paxton; MacDougall, Laura; Kidd, Sarah; Chow, Yat; Mak, Sunny; Fyfe, Murray	Microbe hunting: a Curious Case of Cryptococcus	JOURNAL OF ENVIRONMENTAL HEALTH SCIENCES	31	199		2005	1738-4087
Neilson, ME; Wilson, RR	mtDNA singletons as evidence of a post-invasion genetic bottleneck in yellowfin goby Acanthogobius flavimanus from San Francisco Bay, California	MARINE ECOLOGY PROGRESS SERIES	296	197	10.3354/meps296197	2005	0171-8630
Wonham, MJ; O'Connor, M; Harley, CDG	Positive effects of a dominant invader on introduced and native mudflat species	MARINE ECOLOGY PROGRESS SERIES	289	109	10.3354/meps289109	2005	0171-8630
Thieltges, DW	Impact of an invader: epizootic American slipper limpet Crepidula fornicata reduces survival and growth in European mussels	MARINE ECOLOGY PROGRESS SERIES	286	13	10.3354/meps286013	2005	0171-8630
Guseinov, MK; Osmanov, MM; Guseinov, KM	Characteristics in the pelagic ecosystem of the Dagestan region of the Caspian Sea under the impact of the ctenophore Mnemiopsis leidyi (A-agassiz)	OCEANOLOGY	45	62		2005	0001-4370
Chikina, MV; Kucheruk, NV	Long-term changes in the structure of coastal benthic communities in the northeastern part of the Black Sea: Influence of alien species	OCEANOLOGY	45	S176		2005	0001-4370
Dugmore, AJ; Church, MJ; Buckland, PC; Edwards, KJ; Lawson, I; McGovern, TH; Panagiotakopulu, E; Simpson, IA; Skidmore, P; Sveinbjarnardottir, G	The Norse landnam on the North Atlantic islands: an environmental impact assessment	POLAR RECORD	41	21	10.1017/S0032247404003985	2005	0032-2474
Baret, S; Strasberg, D	The effects of opening trails on exotic plant invasion in protected areas on La Reunion Island (Mascarene Archipelago, Indian Ocean)	REVUE D ECOLOGIE-LA TERRE ET LA VIE	60	325		2005	0249-7395
Oliveras, J; Bas, JM; Casellas, D; Gomez, C	Numerical dominance of the Argentine ant vs native ants and consequences on soil resource searching in Mediterranean cork-oak forests (Hymenoptera : Formicidae)	SOCIOBIOLOGY	45	643		2005	0361-6525
Martel, C; Guarini, JM; Blanchard, G; Sauriau, PG; Trichet, C; Robert, S; Garcia-Meunier, P	Invasion by the marine gastropod Ocinebrellus inornatus in France. III. Comparison of biological traits with the resident species Ocenebra erinacea	MARINE BIOLOGY	146	93	10.1007/s00227-004-1421-8	2004	0025-3162
Mills, MD; Rader, RB; Belk, MC	Complex interactions between native and invasive fish: the simultaneous effects of multiple negative interactions	OECOLOGIA	141	713	10.1007/s00442-004-1695-z	2004	0029-8549
Jiang, L; Morin, PJ	Productivity gradients cause positive diversity-invasibility relationships in microbial communities	ECOLOGY LETTERS	7	1047	10.1111/j.1461-0248.2004.00660.x	2004	1461-023X
Occhipinti-Ambrogi, A; Galil, BS	A uniform terminology on bioinvasions: a chimera or an operative tool?	MARINE POLLUTION BULLETIN	49	688	10.1016/j.marpoplbul.2004.08.011	2004	0025-326X
Davis, HG; Taylor, CM; Lambrinos, JG; Strong, DR	Pollen limitation causes an Allee effect in a wind-pollinated invasive grass (Spartina alterniflora)	PROCEEDINGS OF THE NATIONAL ACADEMY OF SCIENCES OF THE UNITED STATES OF AMERICA	101	13804	10.1073/pnas.0405230101	2004	0027-8424
Dukes, JS; Mooney, HA	Disruption of ecosystem processes in western North America by invasive species	REVISTA CHILENA DE HISTORIA NATURAL	77	411		2004	0716-078X
Figueroa, JA; Castro, SA; Marquet, PA; Jaksic, FM	Exotic plant invasions to the mediterranean region of Chile: causes, history and impacts	REVISTA CHILENA DE HISTORIA NATURAL	77	465		2004	0716-078X
Houlahan, JE; Findlay, CS	Effect of invasive plant species on temperate wetland plant diversity	CONSERVATION BIOLOGY	18	1132	10.1111/j.1523-1739.2004.00391.x	2004	0888-8892
Richman, SE; Lovvorn, JR	Relative foraging value to lesser scaup ducks of native and exotic clams from San Francisco Bay	ECOLOGICAL APPLICATIONS	14	1217	10.1890/03-5032	2004	1051-0761
Wonham, MJ	Mini-review: Distribution of the Mediterranean mussel Mytilus galloprovincialis (Bivalvia : Mytilidae) and hybrids in the Northeast Pacific	JOURNAL OF SHELLFISH RESEARCH	23	535		2004	0730-8000
Landis, WG	Ecological risk assessment conceptual model formulation for nonindigenous species	RISK ANALYSIS	24	847	10.1111/j.0272-4332.2004.00483.x	2004	0272-4332
Brooks, ML; D'Antonio, CM; Richardson, DM; Grace, JB; Keeley, JE; DiTomaso, JM; Hobbs, RJ; Pellant, M; Pyke, D	Effects of invasive alien plants on fire regimes	BIOSCIENCE	54	677	10.1641/0006-3568(2004)054[0677:EOIAPO]2.0.CO;2	2004	0006-3568
Schratzberger, M; Whomersley, P; Warr, K; Bolam, SG; Rees, HL	Colonisation of various types of sediment by estuarine nematodes via lateral infaunal migration: a laboratory study	MARINE BIOLOGY	145	69	10.1007/s00227-004-1302-1	2004	0025-3162
Oboyski, Peter T.; Slotterback, John W.; Banko, Paul C.	Differential parasitism of seed-feeding Cydia (Lepidoptera: Tortricidae) by native and alien wasp species relative to elevation in subalpine Sophora (Fabaceae) forests on Mauna Kea, Hawaii	JOURNAL OF INSECT CONSERVATION	8	229	10.1023/B:JICO.0000045821.71118.54	2004	1366-638X
Callaway, John C.	Restoration of urban salt marshes: Lessons from southern California	Urban Ecosystems	7	107	10.1023/B:UECO.0000036268.84546.53	2004	1083-8155
Valery, L; Bouchard, V; Lefeuvre, JC	Impact of the invasive native species Elymus athericus on carbon pools in a salt marsh	WETLANDS	24	268	10.1672/0277-5212(2004)024[0268:IOTINS]2.0.CO;2	2004	0277-5212
Konisky, RA; Burdick, DM	Effects of stressors on invasive and halophytic plants of New England salt marshes: A framework for predicting response to tidal restoration	WETLANDS	24	434	10.1672/0277-5212(2004)024[0434:EOSOIA]2.0.CO;2	2004	0277-5212
Chapuis, JL; Frenot, Y; Lebouvier, M	Recovery of native plant communities after eradication of rabbits from the subantarctic Kerguelen Islands, and influence of climate change	BIOLOGICAL CONSERVATION	117	167	10.1016/S0006-3207(03)00290-8	2004	0006-3207
Corbin, JD; D'Antonio, CM	Competition between native perennial and exotic annual grasses: Implications for an historical invasion	ECOLOGY	85	1273	10.1890/02-0744	2004	0012-9658
Chavanich, S; Harris, LG	Impact of the non-native macroalga Codium fragile (Sur.) Hariot ssp tomentosoides (van Goor) Silva on the native snail Lacuna vincta (Montagu, 1803) in the Gulf of Maine	VELIGER	47	85		2004	0042-3211
Selifonova, Janet; Jilenkov, Adolf	The impact of invader ctenophore Mnemiopsis leidyi and Beroe ovata on zooplankton of the Novorossiysk Bay, Black Sea	Acta Zoologica Bulgarica	56	83		2004	0324-0770
Davis, HG; Taylor, CM; Civille, JC; Strong, DR	An Allee effect at the front of a plant invasion: Spartina in a Pacific estuary	JOURNAL OF ECOLOGY	92	321	10.1111/j.0022-0477.2004.00873.x	2004	0022-0477
Branch, GM; Steffani, CN	Can we predict the effects of alien species? A case-history of the invasion of South Africa by Mytilus galloprovincialis (Lamarck)	JOURNAL OF EXPERIMENTAL MARINE BIOLOGY AND ECOLOGY	300	189	10.1016/j.jembe.2003.12.007	2004	0022-0981
Thornber, CS; Kinlan, BP; Graham, MH; Stachowicz, JJ	Population ecology of the invasive kelp Undaria pinnatifida in California: environmental and biological controls on demography	MARINE ECOLOGY PROGRESS SERIES	268	69	10.3354/meps268069	2004	0171-8630
Aigner, PA	Ecological and genetic effects on demographic processes: pollination, clonality and seed production in Dithyrea maritima	BIOLOGICAL CONSERVATION	116	27	10.1016/S0006-3207(03)00170-8	2004	0006-3207
Gerlach, J.	Impact of the invasive crazy ant Anoplolepis gracilipes on Bird Island, Seychelles	JOURNAL OF INSECT CONSERVATION	8	15	10.1023/B:JICO.0000027454.78591.97	2004	1366-638X
Corbin, JD; D'Antonio, CM	Can carbon addition increase competitiveness of native grasses? A case study from California	RESTORATION ECOLOGY	12	36	10.1111/j.1061-2971.2004.00299.x	2004	1061-2971
	BIOGEOCHEMICAL SILICIUM CYCLE: ELEMENTAL TO GLOBAL SCALE	BIOGEOCHEMICAL SILICIUM CYCLE: ELEMENTAL TO GLOBAL SCALE	28			2004	0182-0745(print)
Green, PT; Lake, PS; O'Dowd, DJ	Resistance of island rainforest to invasion by alien plants: influence of microhabitat and herbivory on seedling performance	BIOLOGICAL INVASIONS	6	1	10.1023/B:BINV.0000010144.12808.cb	2004	1387-3547
Thresher, RE; Kuris, AM	Options for managing invasive marine species	BIOLOGICAL INVASIONS	6	295	10.1023/B:BINV.0000034598.28718.2e	2004	1387-3547
Saier, B; Chapman, AS	Crusts of the alien bryozoan Membranipora membranacea can negatively impact spore output from native kelps (Laminaria longicruris)	BOTANICA MARINA	47	265	10.1515/BOT.2004.031	2004	0006-8055
Zedler, JB; Kercher, S	Causes and consequences of invasive plants in wetlands: Opportunities, opportunists, and outcomes	CRITICAL REVIEWS IN PLANT SCIENCES	23	431	10.1080/07352680490514673	2004	0735-2689
Schwindt, E; Iribarne, OO; Isla, FI	Physical effects of an invading reef-building polychaete on an Argentinean estuarine environment	ESTUARINE COASTAL AND SHELF SCIENCE	59	109	10.1016/j.ecss.2003.06.004	2004	0272-7714
Bar, P; Cohen, O; Shoshany, M	Invasion rate of the alien species Acacia saligna within coastal sand dune habitats in Israel	ISRAEL JOURNAL OF PLANT SCIENCES	52	115		2004	0792-9978
Le Pape, O; Guerault, D; Desaunay, Y	Effect of an invasive mollusc, American slipper limpet Crepidula fornicata, on habitat suitability for juvenile common sole Solea solea in the Bay of Biscay	MARINE ECOLOGY PROGRESS SERIES	277	107	10.3354/meps277107	2004	0171-8630
Grigg, Richard W.	Harvesting impacts and invasion by an alien species decrease estimates of black coral yield off Maui, Hawai'i.	Pacific Science	58	1	10.1353/psc.2004.0006	2004	0030-8870
Donlan, CJ; Croll, DA; Tershy, BR	Islands, exotic herbivores, and invasive plants: Their roles in coastal California restoration	RESTORATION ECOLOGY	11	524	10.1046/j.1526-100X.2003.rec0259.x	2003	1061-2971
Dew, JR; Berkson, J; Hallerman, EM; Allen, SK	A model for assessing the likelihood of self-sustaining populations resulting from commercial production of triploid Suminoe oysters (Crassostrea ariakensis) in Chesapeake Bay	FISHERY BULLETIN	101	758		2003	0090-0656
Byrnes, J; Witman, JD	Impact assessment of an invasive flatworm, Convoluta convoluta, in the Southern Gulf of Maine	JOURNAL OF EXPERIMENTAL MARINE BIOLOGY AND ECOLOGY	293	173	10.1016/S0022-0981(03)00166-7	2003	0022-0981
Kolb, Annette; Alpert, Peter	Effects of nitrogen and salinity on growth and competition between a native grass and an invasive congener	BIOLOGICAL INVASIONS	5	229	10.1023/A:1026185503777	2003	1387-3547
Lebedeva, LP; Shushkina, EA; Vinogradov, ME; Lukasheva, TA; Anokhina, LL	Long-term transformation of the mesoplankton structure from the coastal waters of the Northeastern Black Sea under the impact of the ctenophores-invaders	OCEANOLOGY	43	670		2003	0001-4370
Panov, Vadim E.; Bychenkov, Dmitry E.; Berezina, Nadya A.; Maximov, Alexey A.	Alien species introductions in the eastern Gulf of Finland: Current state and possible management options.	Proceedings of the Estonian Academy of Sciences Biology Ecology	52	254		2003	1406-0914
Walker, S; Wilson, JB; Steel, JB; Rapson, GL; Smith, B; King, WM; Cottam, YH	Properties of ecotones: Evidence from five ecotones objectively determined from a coastal vegetation gradient	JOURNAL OF VEGETATION SCIENCE	14	579	10.1111/j.1654-1103.2003.tb02185.x	2003	1100-9233
Weis, JS; Weis, P	Is the invasion of the common reed, Phragmites australis, into tidal marshes of the eastern US an ecological disaster?	MARINE POLLUTION BULLETIN	46	816	10.1016/S0025-326X(03)00036-5	2003	0025-326X
Vidal, E; Jouventin, P; Frenot, Y	Contribution of alien and indigenous species to plant-community assemblages near penguin rookeries at Crozet archipelago	POLAR BIOLOGY	26	432	10.1007/s00300-003-0500-5	2003	0722-4060
Glaus, TM; Hauser, K; Hassig, M; Lipp, B; Reusch, CE	Non-invasive measurement of the cardiovascular effects of chronic hypoxaemia on dogs living at moderately high altitude	VETERINARY RECORD	152	800		2003	0042-4900
Larned, ST	Effects of the invasive, nonindigenous seagrass Zostera japonica on nutrient fluxes between the water column and benthos in a NE Pacific estuary	MARINE ECOLOGY PROGRESS SERIES	254	69	10.3354/meps254069	2003	0171-8630
Rocamora, G; Feare, CJ; Skerrett, A; Athanase, M; Greig, E	The breeding avifauna of Cosmoledo Atoll (Seychelles) with special reference to seabirds: conservation status and international importance	BIRD CONSERVATION INTERNATIONAL	13	151	10.1017/S0959270903003137	2003	0959-2709
Nash, CE	Interactions of Atlantic salmon in the Pacific Northwest VI. A synopsis of the risk and uncertainty	FISHERIES RESEARCH	62	339	10.1016/S0165-7836(03)00068-7	2003	0165-7836
Dupont, L; Jollivet, D; Viard, F	High genetic diversity and ephemeral drift effects in a successful introduced mollusc (Crepidula fornicata : Gastropoda)	MARINE ECOLOGY PROGRESS SERIES	253	183	10.3354/meps253183	2003	0171-8630
Finenko, GA; Romanova, ZA; Abolmasova, GI; Anninsky, BE; Svetlichny, LS; Hubareva, ES; Bat, L; Kideys, AE	Population dynamics, ingestion, growth and reproduction rates of the invader Beroe ovata and its impact on plankton community in Sevastopol Bay, the Black Sea	JOURNAL OF PLANKTON RESEARCH	25	539	10.1093/plankt/25.5.539	2003	0142-7873
Gelbard, JL; Harrison, S	Roadless habitats as refuges for native grasslands: Interactions with soil, aspect, and grazing	ECOLOGICAL APPLICATIONS	13	404	10.1890/1051-0761(2003)013[0404:RHARFN]2.0.CO;2	2003	1051-0761
Brooks, ML	Effects of increased soil nitrogen on the dominance of alien annual plants in the Mojave Desert	JOURNAL OF APPLIED ECOLOGY	40	344	10.1046/j.1365-2664.2003.00789.x	2003	0021-8901
Lavoie, C; Jean, M; Delisle, F; Letourneau, G	Exotic plant species of the St Lawrence River wetlands: a spatial and historical analysis	JOURNAL OF BIOGEOGRAPHY	30	537		2003	0305-0270
Cowie, RH; Robinson, AC	The decline of native Pacific island faunas: changes in status of the land snails of Samoa through the 20th century	BIOLOGICAL CONSERVATION	110	55	10.1016/S0006-3207(02)00176-3	2003	0006-3207
Steffani, CN; Branch, GM	Temporal changes in an interaction between an indigenous limpet Scutellastra argenvillei and an alien mussel Mytilus galloprovincialis: Effects of wave exposure	AFRICAN JOURNAL OF MARINE SCIENCE	25	213	10.2989/18142320309504011	2003	0257-7615
	Annual Review of Ecology Evolution and Systematics. Volume 34	Annual Review of Ecology Evolution and Systematics. Volume 34	34	i		2003	1543-592X (ISSN print)
Bowkett, LA; Kirkpatrick, JB	Ecology and conservation of remnant Melaleuca ericifolia stands in the Tamar Valley, Tasmania	AUSTRALIAN JOURNAL OF BOTANY	51	405	10.1071/BT02071	2003	0067-1924
Whitlow, W. Lindsay; Rice, Neil A.; Sweeney, Christine	Native species vulnerability to introduced predators: Testing an inducible defense and a refuge from predation.	Biological Invasions	5	23	10.1023/A:1024059025890	2003	1387-3547
Hahn, Daniel R.	Alteration of microbial community composition and changes in decomposition associated with an invasive intertidal macrophyte.	Biological Invasions	5	45	10.1023/A:1024002908143	2003	1387-3547
Marshall, PA; Edgar, GJ	The effect of the Jessica grounding on subtidal invertebrate and plant communities at the Galapagos wreck site	MARINE POLLUTION BULLETIN	47	284	10.1016/S0025-326X(03)00157-7	2003	0025-326X
Albayrak, Serhat	On the Mollusca fauna of the Black Sea near Istanbul.	Zoology in the Middle East	30	69		2003	0939-7140
Holloway, MG; Keough, MJ	An introduced polychaete affects recruitment and larval abundance of sessile invertebrates	ECOLOGICAL APPLICATIONS	12	1803	10.2307/3099939	2002	1051-0761
Jennings, S; Greenstreet, SPR; Hill, L; Piet, GJ; Pinnegar, JK; Warr, KJ	Long-term trends in the trophic structure of the North Sea fish community: evidence from stable-isotope analysis, size-spectra and community metrics	MARINE BIOLOGY	141	1085	10.1007/s00227-002-0905-7	2002	0025-3162
Alvarez, ME; Cushman, JH	Community-level consequences of a plant invasion: Effects on three habitats in coastal California	ECOLOGICAL APPLICATIONS	12	1434	10.1890/1051-0761(2002)012[1434:CLCOAP]2.0.CO;2	2002	1051-0761
Caraco, NF; Cole, JJ	Contrasting impacts of a native and alien macrophyte on dissolved oxygen in a large river	ECOLOGICAL APPLICATIONS	12	1496	10.2307/3099987	2002	1051-0761
Nollens, HH; Schofield, JC; Keogh, JA; Probert, PK	Evaluation of radiography, ultrasonography and endoscopy for detection of shell lesions in live abalone Haliotis iris (Mollusca : Gastropoda)	DISEASES OF AQUATIC ORGANISMS	50	145	10.3354/dao050145	2002	0177-5103
Holloway, MG; Keough, MJ	Effects of an introduced polychaete, Sabella spallanzanii, on the development of epifaunal assemblages	MARINE ECOLOGY PROGRESS SERIES	236	137	10.3354/meps236137	2002	0171-8630
Rilov, G; Gasith, A; Benayahu, Y	Effect of an exotic prey on the feeding pattern of a predatory snail	MARINE ENVIRONMENTAL RESEARCH	54	85	10.1016/S0141-1136(02)00096-X	2002	0141-1136
Gubanova, AD; Polikarpov, IG; Saburova, MA; Prusova, IY	Long-term dynamics of mesozooplankton by the example of the Copepoda community in Sevastopol Bay (1976-1996)	OCEANOLOGY	42	512		2002	0001-4370
Walton, WC; MacKinnon, C; Rodriguez, LF; Proctor, C; Ruiz, GA	Effect of an invasive crab upon a marine fishery: green crab, Carcinus maenas, predation upon a venerid clam, Katelysia scalarina, in Tasmania (Australia)	JOURNAL OF EXPERIMENTAL MARINE BIOLOGY AND ECOLOGY	272	171	10.1016/S0022-0981(02)00127-2	2002	0022-0981
Cione, NK; Padgett, PE; Allen, EB	Restoration of a native shrubland impacted by exotic grasses, frequent fire, and nitrogen deposition in southern California	RESTORATION ECOLOGY	10	376	10.1046/j.1526-100X.2002.02038.x	2002	1061-2971
Lohrer, AM; Whitlatch, RB	Interactions among aliens: Apparent replacement of one exotic species by another	ECOLOGY	83	719	10.1890/0012-9658(2002)083[0719:IAAARO]2.0.CO;2	2002	0012-9658
Lohrer, AM; Whitlatch, RB	Relative impacts of two exotic brachyuran species on blue mussel populations in Long Island Sound	MARINE ECOLOGY PROGRESS SERIES	227	135	10.3354/meps227135	2002	0171-8630
Smith, VR	Climate change in the sub-Antarctic: An illustration from Marion Island	CLIMATIC CHANGE	52	345	10.1023/A:1013718617277	2002	0165-0009
Orensanz, Jose Maria (Lobo); Schwindt, Evangelina; Pastorino, Guido; Bortolus, Alejandro; Casas, Graciela; Darrigran, Gustavo; Elias, Rodolfo; Lopez Gappa, Juan J.; Obenat, Sandra; Pascual, Marcela; Penchaszadeh, Pablo; Piriz, Maria Luz; Scarabino, Fabrizio; Spivak, Eduardo D.; Vallarino, Eduardo A.	No longer the pristine confines of the world ocean: A survey of exotic marine species in the southwestern Atlantic.	Biological Invasions	4	115		2002	1387-3547
Forrest, Barrie M.; Taylor, Michael D.	Assessing invasion impact: Survey design considerations and implications for management of an invasive marine plant.	Biological Invasions	4	375	10.1023/A:1023613428351	2002	1387-3547
Litton, CM; Santelices, R	Early post-fire succession in a Nothofagus glauca forest in the Coastal Cordillera of south-central Chile	INTERNATIONAL JOURNAL OF WILDLAND FIRE	11	115	10.1071/WF02039	2002	1049-8001
West, P; Nabhan, GP	Invasive plants - Their occurrence and possible impact on the Central Gulf Coast of Sonora and the Midriff Islands in the Sea of Cortes	INVASIVE EXOTIC SPECIES IN THE SONORAN REGION		91		2002
Byers, JE	Physical habitat attribute mediates biotic resistance to non-indigenous species invasion	OECOLOGIA	130	146	10.1007/s004420100777	2002	0029-8549
Utter, F; Epifanio, J	Marine aquaculture: Genetic potentialities and pitfalls	REVIEWS IN FISH BIOLOGY AND FISHERIES	12	59	10.1023/A:1022644021870	2002	0960-3166
Lenz, L; Taylor, JA	The influence of an invasive tree species (Myrica faya) on the abundance of an alien insect (Sophonia rufofascia) in Hawai'i Volcanoes National Park	BIOLOGICAL CONSERVATION	102	301	10.1016/S0006-3207(01)00103-3	2001	0006-3207
Roemer, GW; Coonan, TJ; Garcelon, DK; Bascompte, J; Laughrin, L	Feral pigs facilitate hyperpredation by golden eagles and indirectly cause the decline of the island fox	ANIMAL CONSERVATION	4	307		2001	1367-9430
Talman, SG; Keough, MJ	Impact of an exotic clam, Corbula gibba, on the commercial scallop Pecten fumatus in Port Phillip Bay, south-east Australia: evidence of resource-restricted growth in a subtidal environment	MARINE ECOLOGY PROGRESS SERIES	221	135	10.3354/meps221135	2001	0171-8630
Zhou, G; Baumgartner, J; Overholt, WA	Impact assessment of an exotic parasitoid on stemborer (Lepidoptera) population dynamics in Kenya	ECOLOGICAL APPLICATIONS	11	1554	10.2307/3060939	2001	1051-0761
Shiganova, TA; Mirzoyan, ZA; Studenikina, EA; Volovik, SP; Siokou-Frangou, I; Zervoudaki, S; Christou, ED; Skirta, AY; Dumont, HJ	Population development of the invader ctenophore Mnemiopsis leidyi, in the Black Sea and in other seas of the Mediterranean basin	MARINE BIOLOGY	139	431		2001	0025-3162
Harlin, MM; Villalard-Bohnsack, M	Seasonal dynamics and recruitment strategies of the invasive seaweed Grateloupia doryphora (Halymeniaceae, Rhodophyta) in Narragansett Bay and Rhode Island Sound, Rhode Island, USA	PHYCOLOGIA	40	468	10.2216/i0031-8884-40-5-468.1	2001	0031-8884
Panov, Vadim E.; Golubkov, Sergey M.; Orlova, Marina I.	Littoral zone research in the Neva estuary (eastern Gulf of Finland): History and perspectives	Proceedings of the Estonian Academy of Sciences Biology Ecology	50	194		2001	1406-0914
Gabriel, AGA; Chown, SL; Barendse, J; Marshall, DJ; Mercer, RD; Pugh, PJA; Smith, VR	Biological invasions of Southern Ocean islands: the Collembola of Marion Island as a test of generalities	ECOGRAPHY	24	421	10.1034/j.1600-0587.2001.d01-198.x	2001	0906-7590
Moss, AG; Estes, AM; Muellner, LA; Morgan, DD	Protistan epibionts of the ctenophore Mnemiopsis mccradyi Mayer	HYDROBIOLOGIA	451	295	10.1023/A:1011846022599	2001	0018-8158
Burger, JC; Patten, MA; Prentice, TR; Redak, RA	Evidence for spider community resilience to invasion by non-native spiders	BIOLOGICAL CONSERVATION	98	241	10.1016/S0006-3207(00)00159-2	2001	0006-3207
Hooker, SK; Baird, RW; Al-Omari, S; Gowans, S; Whitehead, H	Behavioral reactions of northern bottlenose whales (Hyperoodon ampullatus) to biopsy darting and tag attachment procedures	FISHERY BULLETIN	99	303		2001	0090-0656
McIvor, L; Maggs, CA; Provan, J; Stanhope, MJ	rbcL sequences reveal multiple cryptic introductions of the Japanese red alga Polysiphonia harveyi	MOLECULAR ECOLOGY	10	911	10.1046/j.1365-294X.2001.01240.x	2001	0962-1083
Telesh, I. V.; Bol'shagin, P. V.; Panov, V. E.	Quantitative estimation of the impact of alien species Cercopagis pengoi (Crustacea: Onychopoda) on the structure and functioning of Plankton community in the Gulf of Finland, Baltic Sea	Doklady Akademii Nauk	377	427		2001	0869-5652
Mori, Mario; Vacchi, Marino	On a new occurrence of the alien flat crab, Percnon gibbesi (H. Milne Edwards), in the southern Sicily (Central Mediterranean sea) (Crustacea, Brachyura, Grapsidae).	Annali del Museo Civico di Storia Naturale "Giacomo Doria"	94	295		2001	0365-4389
Crooks, Jeffrey A.	Assessing invader roles within changing ecosystems: Historical and experimental perspectives on an exotic mussel in an urbanized lagoon.	Biological Invasions	3	23	10.1023/A:1011404914338	2001	1387-3547
Vostokov, S. V.; Arashkevich, E. G.; Drits, A. V.; Lukashev, Yu. F.	Ecological and physiological characteristics of the ctenophore Beroe ovata in the coastal waters of the Black Sea: Quantity, biomass, size distribution, hunting behavior, feeding and metabolism.	Okeanologiya	41	109		2001	0030-1574
Carr, G. W.	Australian plants as weeds in Victoria	Plant Protection Quarterly	16	124		2001	0815-2195
Bolger, DT; Suarez, AV; Crooks, KR; Morrison, SA; Case, TJ	Arthropods in urban habitat fragments in southern California: Area, age, and edge effects	ECOLOGICAL APPLICATIONS	10	1230	10.1890/1051-0761(2000)010[1230:AIUHFI]2.0.CO;2	2000	1051-0761
Le Maitre, DC; Versfeld, DB; Chapman, RA	The impact of invading alien plants on surface water resources in South Africa: A preliminary assessment	WATER SA	26	397		2000	0378-4738
Afli, A; Glemarec, M	Long-term fluctuation of macrobenthic communities of the Morbihan gulf (Brittany, France)	CAHIERS DE BIOLOGIE MARINE	41	67		2000	0007-9723
SanLeon, DG; Izco, J; Sanchez, JM	Spartina patens as a weed in Galician saltmarshes (NW Iberian Peninsula)	HYDROBIOLOGIA	415	213	10.1023/A:1003835201167	1999	0018-8158
Crooks, JA; Khim, HS	Architectural vs. biological effects of a habitat-altering, exotic mussel, Musculista senhousia	JOURNAL OF EXPERIMENTAL MARINE BIOLOGY AND ECOLOGY	240	53	10.1016/S0022-0981(99)00041-6	1999	0022-0981
Viejo, RM	Mobile epifauna inhabiting the invasive Sargassum muticum and two local seaweeds in northern Spain	AQUATIC BOTANY	64	131	10.1016/S0304-3770(99)00011-X	1999	0304-3770
Bridgewater, Peter B.; Cresswell, Ian D.	Biogeography of mangrove and saltmarsh vegetation: Implications for conservation and management in Australia	Mangroves and Salt Marshes	3	117	10.1023/A:1009905127930	1999	1386-3509
Davies, KF; Melbourne, BA	Statistical models of invertebrate distribution on Macquarie Island: a tool to assess climate change and local human impacts	POLAR BIOLOGY	21	240	10.1007/s003000050359	1999	0722-4060
Eguchi, Kazuhiro; Amano, Hitoha Esther	Naturalisation of exotic birds in Japan	Japanese Journal of Ornithology	47	97	10.3838/jjo.47.97	1999	0913-400X
Lemus Castro, Andres J.	Exotic seaweeds and its presence in Venezuelan seas	Acta Cientifica Venezolana	50	11		1999	0001-5504
Hingston, AB; McQuillan, PB	Does the recently introduced bumblebee Bombus terrestris (Apidae) threaten Australian ecosystems?	AUSTRALIAN JOURNAL OF ECOLOGY	23	539		1998	0307-692X
Frankie, GW; Thorp, RW; Newstrom-Lloyd, LE; Rizzardi, MA; Barthell, JF; Griswold, TL; Kim, JY; Kappagoda, S	Monitoring solitary bees in modified wildland habitats: Implications for bee ecology and conservation	ENVIRONMENTAL ENTOMOLOGY	27	1137		1998	0046-225X
Gremmen, NJM; Chown, SL; Marshall, DJ	Impact of the introduced grass Agrostis stolonifera on vegetation and soil fauna communities at Marion Island, sub-Antarctic	BIOLOGICAL CONSERVATION	85	223	10.1016/S0006-3207(97)00178-X	1998	0006-3207
Eno, N. C.	The introduction to British waters of non-native marine molluscs and the implications to nature conservation interests	Journal of Conchology	SPECIAL PUBL.	287		1998	0022-0019
Pickart, AJ; Miller, LM; Duebendorfer, TE	Yellow bush lupine invasion in northern California coastal dunes - I. Ecological impacts and manual restoration techniques	RESTORATION ECOLOGY	6	59	10.1046/j.1526-100x.1998.00618.x	1998	1061-2971
Essink, Karel; Eppinga, Jerry; Dekker, Rob	Long-term changes (1977-1994) in intertidal macrozoobenthos of the Dollard (Ems Eestuary) and effects of introduction of the North American spionid polychaete Marenzelleria cf. wireni	Senckenbergiana Maritima	28	211		1998	0080-889X
Kotanen, PM	Effects of experimental soil disturbance on revegetation by natives and exotics in coastal Californian meadows	JOURNAL OF APPLIED ECOLOGY	34	631	10.2307/2404912	1997	0021-8901
Florence, Jacques; Lorence, David H.	Introduction to the flora and vegetation of the Marquesas Islands	Allertonia	7	226		1997	0735-8032
Maekawa, Masa-Aki; Nakagoshi, Nobukazu	Impact of biological invasion of Robinia pseudo-acacia on zonation and species diversity of dune vegetation in central Japan	Japanese Journal of Ecology (Tokyo)	47	131		1997	0021-5007
Russell, CS	Integrating ecology and economics via regional modeling	ECOLOGICAL APPLICATIONS	6	1025	10.2307/2269585	1996	1051-0761
Torchin, ME; Lafferty, KD; Kuris, AM	Infestation of an introduced host, the European green crab, Carcinus maenas, by a symbiotic nemertean egg predator, Carcinonemertes epialti	JOURNAL OF PARASITOLOGY	82	449	10.2307/3284084	1996	0022-3395
Morden, Clifford W.; Caraway, Vickie; Motley, Timothy J.	Development of a DNA library for native Hawaiian plants	Pacific Science	50	324		1996	0030-8870
RABB, GB; SULLIVAN, TA	COORDINATING CONSERVATION - GLOBAL NETWORKING FOR SPECIES SURVIVAL	BIODIVERSITY AND CONSERVATION	4	536	10.1007/BF00222512	1995	0960-3115
ALLEN, CR; LUTZ, RS; DEMARAIS, S	RED IMPORTED FIRE ANT IMPACTS ON NORTHERN BOBWHITE POPULATIONS	ECOLOGICAL APPLICATIONS	5	632	10.2307/1941972	1995	1051-0761
LIEBHOLD, AM; MACDONALD, WL; BERGDAHL, D; MAESTRO, VC	INVASION BY EXOTIC FOREST PESTS - A THREAT TO FOREST ECOSYSTEMS	FOREST SCIENCE	41	1		1995	0015-749X
	Ecological Studies Analysis and Synthesis, Vol. 109. Mediterranean-type ecosystems: The function of biodiversity	Ecological Studies; Mediterranean-type ecosystems: The function of biodiversity	109	xviii+366p		1995	0070-8356
CHAPUIS, JL; BOUSSES, P; BARNAUD, G	ALIEN MAMMALS, IMPACT AND MANAGEMENT IN THE FRENCH SUB-ANTARCTIC ISLANDS	BIOLOGICAL CONSERVATION	67	97	10.1016/0006-3207(94)90353-0	1994	0006-3207
GUTIERREZ, JR	EFFECTS OF LOW WATER SUPPLEMENTATION AND NUTRIENT ADDITION ON THE ABOVEGROUND BIOMASS PRODUCTION OF ANNUAL PLANTS IN A CHILEAN COASTAL DESERT SITE	OECOLOGIA	90	556	10.1007/BF01875450	1992	0029-8549
WITKOWSKI, ETF	EFFECTS OF INVASIVE ALIEN ACACIAS ON NUTRIENT CYCLING IN THE COASTAL LOWLANDS OF THE CAPE FYNBOS	JOURNAL OF APPLIED ECOLOGY	28	1	10.2307/2404109	1991	0021-8901
MACDONALD, IAW; THEBAUD, C; STRAHM, WA; STRASBERG, D	EFFECTS OF ALIEN PLANT INVASIONS ON NATIVE VEGETATION REMNANTS ON LA REUNION (MASCARENE-ISLANDS, INDIAN-OCEAN)	ENVIRONMENTAL CONSERVATION	18	51		1991	0376-8929
MENG, L; ORSI, JJ	SELECTIVE PREDATION BY LARVAL STRIPED BASS ON NATIVE AND INTRODUCED COPEPODS	TRANSACTIONS OF THE AMERICAN FISHERIES SOCIETY	120	187	10.1577/1548-8659(1991)120<0187:SPBLSB>2.3.CO;2	1991	0002-8487
MACDONALD I A W; THEBAUD C; STRAHM W A; STRASBERG D	EFFECTS OF ALIEN PLANT INVASIONS ON NATIVE VEGETATION REMNANTS ON LA REUNION MASCARENE ISLANDS INDIAN OCEAN	Environmental Conservation	18	51		1991	0376-8929
RAUCH, N	COMPETITION OF MARINE IGUANA FEMALES (AMBLYRHYNCHUS, CRISTATUS) FOR EGG-LAYING SITES	BEHAVIOUR	107	91	10.1163/156853988X00214	1988	0005-7959
MRACEK, Z	THE USE OF GALLERIA TRAPS FOR OBTAINING NEMATODE PARASITES OF INSECTS IN CZECHOSLOVAKIA (LEPIDOPTERA, NEMATODA, STEINERNEMATIDAE)	ACTA ENTOMOLOGICA BOHEMOSLOVACA	77	378		1980	0001-5601
NASIMOVICH A A	THE BEREZINA NATURE RESERVE BELORUSSIAN-SSR USSR	Byulleten' Moskovskogo Obshchestva Ispytatelei Prirody Otdel Biologicheskii	84	111		1979	0027-1403
AUSTIN, DF	EXOTIC PLANTS AND THEIR EFFECTS IN SOUTHEASTERN FLORIDA	ENVIRONMENTAL CONSERVATION	5	25		1978	0376-8929
RICHARDS, BN; BEVEGE, DI	PRODUCTIVITY AND NITROGEN ECONOMY OF ARTIFICIAL ECOSYSTEMS COMPRISING VARIOUS COMBINATIONS OF PERENNIAL LEGUMES AND CONIFEROUS TREE SPECIES	AUSTRALIAN JOURNAL OF BOTANY	15	467	10.1071/BT9670467	1967	0067-1924
BROUARD, N. R.	A brief account of the 1960 cyclones and their effects upon exotic plantations in Mauritius	EMPIRE FOREST REV	39	411		1960
Liu, M; Yu, Z; Yu, XQ; Xue, YY; Huang, BQ; Yang, J	Invasion by Cordgrass Increases Microbial Diversity and Alters Community Composition in a Mangrove Nature Reserve	FRONTIERS IN MICROBIOLOGY	8		10.3389/fmicb.2017.02503	2017	1664-302X
Russell, JC; Meyer, JY; Holmes, ND; Pagad, S	Invasive alien species on islands: impacts, distribution, interactions and management	ENVIRONMENTAL CONSERVATION	44	359	10.1017/S0376892917000297	2017	0376-8929
Suarez-Jimenez, R; Hepburn, CD; Hyndes, GA; McLeod, RJ; Taylor, RB; Hurd, CL	The invasive kelp Undaria pinnatifida hosts an epifaunal assemblage similar to native seaweeds with comparable morphologies	MARINE ECOLOGY PROGRESS SERIES	582	45	10.3354/meps12321	2017	0171-8630
Crocetta, F; Gofas, S; Salas, C; Tringali, LP; Zenetos, A	Local ecological knowledge versus published literature: a review of non-indigenous Mollusca in Greek marine waters	AQUATIC INVASIONS	12	415	10.3391/ai.2017.12.4.01	2017	1798-6540
Spatz, DR; Holmes, ND; Reguero, BG; Butchart, SHM; Tershy, BR; Croll, DA	Managing Invasive Mammals to Conserve Globally Threatened Seabirds in a Changing Climate	CONSERVATION LETTERS	10	736	10.1111/conl.12373	2017	1755-263X
O'Loughlin, LS; Green, PT	The secondary invasion of giant African land snail has little impact on litter or seedling dynamics in rainforest	AUSTRAL ECOLOGY	42	819	10.1111/aec.12504	2017	1442-9985
Lagos, ME; White, CR; Marshall, DJ	Do invasive species live faster? Mass-specific metabolic rate depends on growth form and invasion status	FUNCTIONAL ECOLOGY	31	2080	10.1111/1365-2435.12913	2017	0269-8463
Tzadik, OE; Jones, DL; Peebles, EB; Koenig, CC; Stallings, CD	The Effects of Spatial Scale on Assigning Nursery Habitats in Atlantic Goliath Groupers (Epinephelus itajara) Using Non-lethal Analyses of Fin Rays	ESTUARIES AND COASTS	40	1785	10.1007/s12237-017-0244-z	2017	1559-2723
Peiffer, F; Bejarano, S; de Witte, GP; Wild, C	Ongoing removals of invasive lionfish in Honduras and their effect on native Caribbean prey fishes	PEERJ	5		10.7717/peerj.3818	2017	2167-8359
Graham, RE; Fanning, LM	A comparison of eight country plans for the Invasive Indo-Pacific Lionfish in the Wider Caribbean	GLOBAL ECOLOGY AND CONSERVATION	12	253	10.1016/j.gecco.2017.12.001	2017	2351-9894
Gewing, MT; Lopez-Legentil, S; Shenkar, N	Anthropogenic factors influencing invasive ascidian establishment in natural environments	MARINE ENVIRONMENTAL RESEARCH	131	236	10.1016/j.marenvres.2017.10.001	2017	0141-1136
South, PM; Floerl, O; Forrest, BM; Thomsen, MS	A review of three decades of research on the invasive kelp Undaria pinnatifida in Australasia: An assessment of its success, impacts and status as one of the world's worst invaders	MARINE ENVIRONMENTAL RESEARCH	131	243	10.1016/j.marenvres.2017.09.015	2017	0141-1136
Swanson, W; De Jager, NR; Strauss, E; Thomsen, M	Effects of flood inundation and invasion by Phalaris arundinacea on nitrogen cycling in an Upper Mississippi River floodplain forest	ECOHYDROLOGY	10		10.1002/eco.1877	2017	1936-0584
Epstein, G; Smale, DA	Undaria pinnatifida: A case study to highlight challenges in marine invasion ecology and management	ECOLOGY AND EVOLUTION	7	8624	10.1002/ece3.3430	2017	2045-7758
Thomson, DM; King, RA; Schultz, EL	Between invaders and a risky place: Exotic grasses alter demographic tradeoffs of native forb germination timing	ECOSPHERE	8		10.1002/ecs2.1987	2017	2150-8925
Yelenik, SG; D'Antonio, CM; August-Schmidt, E	The influence of soil resources and plant traits on invasion and restoration in a subtropical woodland	PLANT ECOLOGY	218	1149	10.1007/s11258-017-0757-3	2017	1385-0237
Charbonneau, BR; Wootton, LS; Wnek, JP; Langley, JA; Posner, MA	A species effect on storm erosion: Invasive sedge stabilized dunes more than native grass during Hurricane Sandy	JOURNAL OF APPLIED ECOLOGY	54	1385	10.1111/1365-2664.12846	2017	0021-8901
De La Riva, DG; Jones, MB; Trumble, JT	Evidence for the transfer of a soil-borne contaminant from plants to ants via an aphid mediator	ECOLOGICAL ENTOMOLOGY	42	545	10.1111/een.12415	2017	0307-6946
Dijkstra, JA; Westerman, EL; Harris, LG	Elevated seasonal temperatures eliminate thermal barriers of reproduction of a dominant invasive species: A community state change for northern communities?	DIVERSITY AND DISTRIBUTIONS	23	1182	10.1111/ddi.12604	2017	1366-9516
Welch, JN; Leppanen, C	The threat of invasive species to bats: a review	MAMMAL REVIEW	47	277	10.1111/mam.12099	2017	0305-1838
Feng, JX; Zhou, J; Wang, LM; Cui, XW; Ning, CX; Wu, H; Zhu, XS; Lin, GH	Effects of short-term invasion of Spartina alterniflora and the subsequent restoration of native mangroves on the soil organic carbon, nitrogen and phosphorus stock	CHEMOSPHERE	184	774	10.1016/j.chemosphere.2017.06.060	2017	0045-6535
Mancinelli, G; Chainho, P; Cilenti, L; Falco, S; Kapiris, K; Katselis, G; Ribeiro, F	On the Atlantic blue crab (Callinectes sapidus Rathbun 1896) in southern European coastal waters: Time to turn a threat into a resource?	FISHERIES RESEARCH	194	1	10.1016/j.fishres.2017.05.002	2017	0165-7836
Corrales, X; Coll, M; Ofir, E; Piroddi, C; Goren, M; Edelist, D; Heymans, JJ; Steenbeek, J; Christensen, V; Gal, G	Hindcasting the dynamics of an Eastern Mediterranean marine ecosystem under the impacts of multiple stressors	MARINE ECOLOGY PROGRESS SERIES	580	17	10.3354/meps12271	2017	0171-8630
Denley, D; Metaxas, A	Lack of substrate specificity contributes to invasion success and persistence of Membranipora membranacea in the northwest Atlantic	MARINE ECOLOGY PROGRESS SERIES	580	117	10.3354/meps12287	2017	0171-8630
Magliozzi, L; Almada, F; Robalo, J; Mollo, E; Polese, G; Goncalves, EJ; Felline, S; Terlizzi, A; D'Aniello, B	Cryptic effects of biological invasions: Reduction of the aggressive behaviour of a native fish under the influence of an "invasive" biomolecule	PLOS ONE	12		10.1371/journal.pone.0185620	2017	1932-6203
Rizzo, L; Pusceddu, A; Stabili, L; Alifano, P; Fraschetti, S	Potential effects of an invasive seaweed (Caulerpa cylindracea, Sonder) on sedimentary organic matter and microbial metabolic activities	SCIENTIFIC REPORTS	7		10.1038/s41598-017-12556-4	2017	2045-2322
Herbert, RJH; Collins, K; Mallinson, J; Hall, AE; Pegg, J; Rosso, K; Clarke, L; Clements, T	Epibenthic and mobile species colonisation of a geotextile artificial surf reef on the south coast of England	PLOS ONE	12		10.1371/journal.pone.0184100	2017	1932-6203
Reise, K; Buschbaum, C; Buttger, H; Wegner, KM	Invading oysters and native mussels: from hostile takeover to compatible bedfellows	ECOSPHERE	8		10.1002/ecs2.1949	2017	2150-8925
Sarabeev, V; Balbuena, JA; Morand, S	Testing the enemy release hypothesis: abundance and distribution patterns of helminth communities in grey mullets (Teleostei: Mugilidae) reveal the success of invasive species	INTERNATIONAL JOURNAL FOR PARASITOLOGY	47	687	10.1016/j.ijpara.2017.05.006	2017	0020-7519
Martin, RM	Effects of Warming on Invasive Phragmites australis and Native Spartina patens Seed Germination Rates and Implications for Response to Climate Change	NORTHEASTERN NATURALIST	24	235		2017	1092-6194
Liu, JE; Han, RM; Su, HR; Wu, YP; Zhang, LM; Richardson, CJ; Wang, GX	Effects of exotic Spartina alterniflora on vertical soil organic carbon distribution and storage amount in coastal salt marshes in Jiangsu, China	ECOLOGICAL ENGINEERING	106	132	10.1016/j.ecoleng.2017.05.041	2017	0925-8574
Rohde, S; Schupp, PJ; Markert, A; Wehrmann, A	Only half of the truth: Managing invasive alien species by rapid assessment	OCEAN & COASTAL MANAGEMENT	146	26	10.1016/j.ocecoaman.2017.05.013	2017	0964-5691
Pinto, PIS; Esteao, MD; Santos, S; Andrade, A; Power, DM	In vitro screening for estrogenic endocrine disrupting compounds using Mozambique tilapia and sea bass scales	COMPARATIVE BIOCHEMISTRY AND PHYSIOLOGY C-TOXICOLOGY & PHARMACOLOGY	199	106	10.1016/j.cbpc.2017.06.002	2017	1532-0456
Howard, BR; Therriault, TW; Cote, IM	Contrasting ecological impacts of native and non-native marine crabs: a global meta-analysis	MARINE ECOLOGY PROGRESS SERIES	577	93	10.3354/meps12245	2017	0171-8630
Ramus, AP; Silliman, BR; Thomsen, MS; Long, ZT	An invasive foundation species enhances multifunctionality in a coastal ecosystem	PROCEEDINGS OF THE NATIONAL ACADEMY OF SCIENCES OF THE UNITED STATES OF AMERICA	114	8580	10.1073/pnas.1700353114	2017	0027-8424
Thinesh, T; Meenatchi, R; Pasiyappazham, R; Jose, PA; Selvan, M; Kiran, GS; Selvin, J	Short-term in situ shading effectively mitigates linear progression of coral-killing sponge Terpios hoshinota	PLOS ONE	12		10.1371/journal.pone.0182365	2017	1932-6203
Chun, SY; Kim, S; Nam, KS	The inhibitory effects of deep-sea water on doxorubicin-induced epithelial-mesenchymal transition	ONCOLOGY REPORTS	38	1163	10.3892/or.2017.5726	2017	1021-335X
Vieira, R; Pinto, IS; Arenas, F	The role of nutrient enrichment in the invasion process in intertidal rock pools	HYDROBIOLOGIA	797	183	10.1007/s10750-017-3171-x	2017	0018-8158
Patten, K; O'Casey, C; Metzger, C	Large-Scale Chemical Control of Smooth Cordgrass (Spartina alterniflora) in Willapa Bay, WA: Towards Eradication and Ecological Restoration	INVASIVE PLANT SCIENCE AND MANAGEMENT	10	284	10.1017/inp.2017.25	2017	1939-7291
de Sa, NC; Carvalho, S; Castro, P; Marchante, E; Marchante, H	Using Landsat Time Series to Understand How Management and Disturbances Influence the Expansion of an Invasive Tree	IEEE JOURNAL OF SELECTED TOPICS IN APPLIED EARTH OBSERVATIONS AND REMOTE SENSING	10	3243	10.1109/JSTARS.2017.2673761	2017	1939-1404
Jayasinghe, RPPK; Amarasinghe, US; Newton, A	Evaluation of status of commercial fish stocks in European marine subareas using mean trophic levels of fish landings and spawning stock biomass	OCEAN & COASTAL MANAGEMENT	143	154	10.1016/j.ocecoaman.2016.07.002	2017	0964-5691
Robbins, WD; Huveneers, C; Parra, GJ; Moller, L; Gillanders, BM	Anthropogenic threat assessment of marine-associated fauna in Spencer Gulf, South Australia	MARINE POLICY	81	392	10.1016/j.marpol.2017.03.036	2017	0308-597X
Mancinelli, G; Chainho, P; Cilenti, L; Falco, S; Kapiris, K; Katselis, G; Ribeiro, F	The Atlantic blue crab Callinectes sapidus in southern European coastal waters: Distribution, impact and prospective invasion management strategies	MARINE POLLUTION BULLETIN	119	5	10.1016/j.marpolbul.2017.02.050	2017	0025-326X
Daneshgar, PP; Phillips, LB; James, DP; Mickley, MG; Bohackyj, AM; Rhoads, LJ; Bastian, RP; Wootton, LS	The Role of Beach Nourishment on the Success of Invasive Asiatic Sand Sedge	NORTHEASTERN NATURALIST	24	110	10.1656/045.024.0202	2017	1092-6194
Thoresen, JJ; Towns, D; Leuzinger, S; Durrett, M; Mulder, CPH; Wardle, DA	Invasive rodents have multiple indirect effects on seabird island invertebrate food web structure	ECOLOGICAL APPLICATIONS	27	1190	10.1002/eap.1513	2017	1051-0761
Corrales, X; Ofir, E; Coll, M; Goren, M; Edelist, D; Heymans, JJ; Gal, G	Modeling the role and impact of alien species and fisheries on the Israeli marine continental shelf ecosystem	JOURNAL OF MARINE SYSTEMS	170	88	10.1016/j.jmarsys.2017.02.004	2017	0924-7963
De Paula, AF; Fleury, BG; Lages, BG; Creed, JC	Experimental evaluation of the effects of management of invasive corals on native communities	MARINE ECOLOGY PROGRESS SERIES	572	141	10.3354/meps12131	2017	0171-8630
Kauppi, L; Norkko, J; Ikonen, J; Norkko, A	Seasonal variability in ecosystem functions: quantifying the contribution of invasive species to nutrient cycling in coastal ecosystems	MARINE ECOLOGY PROGRESS SERIES	572	193	10.3354/meps12171	2017	0171-8630
Hackerott, S; Valdivia, A; Cox, CE; Silbiger, NJ; Bruno, JF	Invasive lionfish had no measurable effect on prey fish community structure across the Belizean Barrier Reef	PEERJ	5		10.7717/peerj.3270	2017	2167-8359
Courant, J; Vogt, S; Marques, R; Measey, J; Secondi, J; Rebelo, R; De Villiers, A; Ihlow, F; De Busschere, C; Backeljau, T; Rodder, D; Herrel, A	Are invasive populations characterized by a broader diet than native populations?	PEERJ	5		10.7717/peerj.3250	2017	2167-8359
Truong, TTA; Hardy, GES; Andrew, ME	Contemporary Remotely Sensed Data Products Refine Invasive Plants Risk Mapping in Data Poor Regions	FRONTIERS IN PLANT SCIENCE	8		10.3389/fpls.2017.00770	2017	1664-462X
Falcao, JCF; Dattilo, W; Diaz-Castelazo, C; Rico-Gray, V	Assessing the impacts of tramp and invasive species on the structure and dynamic of ant-plant interaction networks	BIOLOGICAL CONSERVATION	209	517	10.1016/j.biocon.2017.03.023	2017	0006-3207
Wheeler, GS; Steininger, MS; Wright, S	Quarantine host range of Bikasha collaris, a potential biological control agent of Chinese tallowtree (Triadica sebifera) in North America	ENTOMOLOGIA EXPERIMENTALIS ET APPLICATA	163	184	10.1111/eea.12573	2017	0013-8703
Graham, SP; Freidenfelds, NA; Thawley, CJ; Robbins, TR; Langkilde, T	Are Invasive Species Stressful? The Glucocorticoid Profile of Native Lizards Exposed to Invasive Fire Ants Depends on the Context	PHYSIOLOGICAL AND BIOCHEMICAL ZOOLOGY	90	328	10.1086/689983	2017	1522-2152
Goldstein, JS; Morrissey, EM; Moretti, ED; Watson, WH	A comparison of the distribution and abundance of European green crabs and American lobsters in the Great Bay Estuary, New Hampshire, USA	FISHERIES RESEARCH	189	10	10.1016/j.fishres.2017.01.002	2017	0165-7836
Pakalniete, K; Aigars, J; Czajkowski, M; Strake, S; Zawojska, E; Hanley, N	Understanding the distribution of economic benefits from improving coastal and marine ecosystems	SCIENCE OF THE TOTAL ENVIRONMENT	584	29	10.1016/j.scitotenv.2017.01.097	2017	0048-9697
Tuttle, LJ	Direct and indirect effects of invasive lionfish on coral-reef cleaning mutualists	MARINE ECOLOGY PROGRESS SERIES	569	163	10.3354/meps12092	2017	0171-8630
Biel, RG; Hacker, SD; Ruggiero, P; Cohn, N; Seabloom, EW	Coastal protection and conservation on sandy beaches and dunes: context-dependent tradeoffs in ecosystem service supply	ECOSPHERE	8		10.1002/ecs2.1791	2017	2150-8925
Velando, A; Moran, P; Romero, R; Fernandez, J; Piorno, V	Invasion and eradication of the American mink in the Atlantic Islands National Park (NW Spain): a retrospective analysis	BIOLOGICAL INVASIONS	19	1227	10.1007/s10530-016-1326-8	2017	1387-3547
Abdou, AA; M'dere, A; Notter, JC; Baret, S	Mapping and impacts of the invasive Hiptage benghalensis liana on Reunion Nand and identification of control priorities	REVUE D ECOLOGIE-LA TERRE ET LA VIE	72	147		2017	0249-7395
Gasparatos, A; Doll, CNH; Esteban, M; Ahmed, A; Olang, TA	Renewable energy and biodiversity: Implications for transitioning to a Green Economy	RENEWABLE & SUSTAINABLE ENERGY REVIEWS	70	161	10.1016/j.rser.2016.08.030	2017	1364-0321
Silva, AG; Fortunato, HFM; Lobo-Hajdu, G; Fleury, BG	Response of native marine sponges to invasive Tubastraea corals: a case study	MARINE BIOLOGY	164		10.1007/s00227-017-3112-2	2017	0025-3162
Bean, TA; Sumner, PD; Boojhawon, R; Tatayah, V; Khadun, AK; Hedding, DW; Rughooputh, SDDV; Nel, W	Bedrock-incised gully erosion phenomena on Round Island, Mauritius	CATENA	151	107	10.1016/j.catena.2016.12.001	2017	0341-8162
Montes, M; Rico, JM; Garcia-Vazquez, E; Pichs, YJB	Molecular barcoding confirms the presence of exotic Asian seaweeds (Pachymeniopsis gargiuli and Grateloupia turuturu) in the Cantabrian Sea, Bay of Biscay	PEERJ	5		10.7717/peerj.3116	2017	2167-8359
Mizrahi, M; Chapman, JK; Gough, CLA; Humber, F; Anderson, LG	Management implications of the influence of biological variability of invasive lionfish diet in Belize	MANAGEMENT OF BIOLOGICAL INVASIONS	8	61	10.3391/mbi.2017.8.1.06	2017	1989-8649
Ender, CL; Christian, CE; Cushman, JH	Native herbivores and environmental heterogeneity as mediators of an exotic grass invasion	ECOLOGY AND EVOLUTION	7	1561	10.1002/ece3.2727	2017	2045-7758
Gammal, J; Norkko, J; Pilditch, CA; Norkko, A	Coastal Hypoxia and the Importance of Benthic Macrofauna Communities for Ecosystem Functioning	ESTUARIES AND COASTS	40	457	10.1007/s12237-016-0152-7	2017	1559-2723
Andradi-Brown, DA; Vermeij, MJA; Slattery, M; Lesser, M; Bejarano, I; Appeldoorn, R; Goodbody-Gringley, G; Chequer, AD; Pitt, JM; Eddy, C; Smith, SR; Brokovich, E; Pinheiro, HT; Jessup, ME; Shepherd, B; Rocha, LA; Curtis-Quick, J; Eyal, G; Noyes, TJ; Rogers, AD; Exton, DA	Large-scale invasion of western Atlantic mesophotic reefs by lionfish potentially undermines culling-based management	BIOLOGICAL INVASIONS	19	939	10.1007/s10530-016-1358-0	2017	1387-3547
Johnston, MW; Bernard, AM; Shivji, MS	Forecasting lionfish sources and sinks in the Atlantic: are Gulf of Mexico reef fisheries at risk?	CORAL REEFS	36	169	10.1007/s00338-016-1511-3	2017	0722-4028
Cheng, BS; Komoroske, LM; Grosholz, ED	Trophic sensitivity of invasive predator and native prey interactions: integrating environmental context and climate change	FUNCTIONAL ECOLOGY	31	642	10.1111/1365-2435.12759	2017	0269-8463
Theuerkauf, SJ; Puckett, BJ; Theuerkauf, KW; Theuerkauf, EJ; Eggleston, DB	Density-dependent role of an invasive marsh grass, Phragmites australis, on ecosystem service provision	PLOS ONE	12		10.1371/journal.pone.0173007	2017	1932-6203
Smith-Ramesh, LM; Moore, AC; Schmitz, OJ	Global synthesis suggests that food web connectance correlates to invasion resistance	GLOBAL CHANGE BIOLOGY	23	465	10.1111/gcb.13460	2017	1354-1013
Ramsay-Newton, C; Drouin, A; Hughes, AR; Bracken, MES	Species, community, and ecosystem-level responses following the invasion of the red alga Dasysiphonia japonica to the western North Atlantic Ocean	BIOLOGICAL INVASIONS	19	537	10.1007/s10530-016-1323-y	2017	1387-3547
Lin, YM; Li, J; Bakker, JD; Lin, H; Chen, C; Hong, W; Fisher, L; Wu, CZ; Hong, T; Deng, HJ; Zhang, GS; Du, K	Wind and salt spray alter tree shape and dry mass density in Casuarina equisetifolia L.	TREES-STRUCTURE AND FUNCTION	31	15	10.1007/s00468-016-1450-1	2017	0931-1890
Johnston, EL; Dafforn, KA; Clark, GF; Rius, M; Floerl, O	HOW ANTHROPOGENIC ACTIVITIES AFFECT THE ESTABLISHMENT AND SPREAD OF NON-INDIGENOUS SPECIES POST-ARRIVAL	OCEANOGRAPHY AND MARINE BIOLOGY: AN ANNUAL REVIEW, VOL 55	55	389		2017	0078-3218
Enge, S; Sagerman, J; Wikstrom, SA; Pavia, H	A REVIEW OF HERBIVORE EFFECTS ON SEAWEED INVASIONS	OCEANOGRAPHY AND MARINE BIOLOGY: AN ANNUAL REVIEW, VOL 55	55	421		2017	0078-3218
Garcia-Rivas, MD; Machkour-M'Rabet, S; Perez-Lachaud, G; Schmitter-Soto, JJ; Doneys, C; St-Jean, N; Cobian, D; Henaut, Y	What are the characteristics of lionfish and other fishes that influence their association in diurnal refuges?	MARINE BIOLOGY RESEARCH	13	899	10.1080/17451000.2017.1314496	2017	1745-1000
Innocenti, G; Stasolla, G; Goren, M; Stern, N; Levitt-Barmats, Y; Diamant, A; Galil, BS	Going down together: invasive host, Charybdis longicollis (Decapoda: Brachyura: Portunidae) and invasive parasite, Heterosaccus dollfusi (Cirripedia: Rhizocephala: Sacculinidae) on the upper slope off the Mediterranean coast of Israel	MARINE BIOLOGY RESEARCH	13	229	10.1080/17451000.2016.1240873	2017	1745-1000
Robinson, TB; Havenga, B; van der Merwe, M; Jackson, S	Mind the gap-context dependency in invasive species impacts: a case study of the ascidian Ciona robusta	NEOBIOTA		127	10.3897/neobiota.32.9373	2017	1619-0033
Avis, PG; Gaswick, WC; Tonkovich, GS; Leacock, PR	Monitoring fungi in ecological restorations of coastal Indiana, USA	RESTORATION ECOLOGY	25	92	10.1111/rec.12397	2017	1061-2971
Florens, FBV; Baider, C; Seegoolam, NB; Zmanay, Z; Strasberg, D	Long-termdeclines of native trees in an oceanic island's tropical forests invaded by alien plants	APPLIED VEGETATION SCIENCE	20	94	10.1111/avsc.12273	2017	1402-2001
Barbosa, JM; Asner, GP; Hughes, RF; Johnson, MT	Landscape-scale GPP and carbon density inform patterns and impacts of an invasive tree across wet forests of Hawaii	ECOLOGICAL APPLICATIONS	27	403	10.1002/eap.1445	2017	1051-0761
McDowell, W; McDowell, WH; Byers, JE	Mass mortality of a dominant invasive species in response to an extreme climate event: Implications for ecosystem function	LIMNOLOGY AND OCEANOGRAPHY	62	177	10.1002/lno.10384	2017	0024-3590
Huang, Y; Zhang, T; Wu, WT; Zhou, YX; Tian, B	Rapid risk assessment of wetland degradation and loss in low-lying coastal zone of Shanghai, China	HUMAN AND ECOLOGICAL RISK ASSESSMENT	23	82	10.1080/10807039.2016.1223536	2017	1080-7039
Bouchemousse, S; Leveque, L; Viard, F	Do settlement dynamics influence competitive interactions between an alien tunicate and its native congener?	ECOLOGY AND EVOLUTION	7	200	10.1002/ece3.2655	2017	2045-7758
Lord, JP	Temperature, space availability, and species assemblages impact competition in global fouling communities	BIOLOGICAL INVASIONS	19	43	10.1007/s10530-016-1262-7	2017	1387-3547
Kindinger, TL; Albins, MA	Consumptive and non-consumptive effects of an invasive marine predator on native coral-reef herbivores	BIOLOGICAL INVASIONS	19	131	10.1007/s10530-016-1268-1	2017	1387-3547
Goedknegt, MA; Schuster, AK; Buschbaum, C; Gergs, R; Jung, AS; Luttikhuizen, PC; van der Meer, J; Troost, K; Wegner, KM; Thieltges, DW	Spillover but no spillback of two invasive parasitic copepods from invasive Pacific oysters (Crassostrea gigas) to native bivalve hosts	BIOLOGICAL INVASIONS	19	365	10.1007/s10530-016-1285-0	2017	1387-3547
Cvitkovic, I; Despalatovic, M; Zuljevic, A; Matijevic, S; Bogner, D; Lusic, J; Travizi, A	Structure of epibiontic and sediment meiofauna in the area invaded by invasive alga Caulerpa taxifolia	MARINE BIOLOGY	164		10.1007/s00227-016-3034-4	2017	0025-3162
Vye, SR; Emmerson, MC; Dick, JTA; O'Connor, NE	Cumulative effects of multiple stressors: An invasive oyster and nutrient enrichment reduce subsequent invasive barnacle recruitment	JOURNAL OF EXPERIMENTAL MARINE BIOLOGY AND ECOLOGY	486	322	10.1016/j.jembe.2016.10.021	2017	0022-0981
Steinberger, Y; Fitoussi, N	SOIL FREE-LIVING NEMATODES AS BIO-INDICATORS FOR ASSAYING THE INVASIVE ALIEN PLANT EFFECT INA COASTAL DUNE ECOSYSTEM	JOURNAL OF NEMATOLOGY	48	372		2016	0022-300X
Meretta, PE; Farias, NE; Cledon, M; Ventura, CRR	Growth pattern and changes in abundance of the endangered bat star Asterina stellifera	MARINE ECOLOGY-AN EVOLUTIONARY PERSPECTIVE	37	1423	10.1111/maec.12359	2016	0173-9565
Giakoumi, S; Guilhaumon, F; Kark, S; Terlizzi, A; Claudet, J; Felline, S; Cerrano, C; Coll, M; Danovaro, R; Fraschetti, S; Koutsoubas, D; Ledoux, JB; Mazor, T; Merigot, B; Micheli, F; Katsanevakis, S	Space invaders; biological invasions in marine conservation planning	DIVERSITY AND DISTRIBUTIONS	22	1220	10.1111/ddi.12491	2016	1366-9516
Azzurro, E; Castriota, L; Falautano, M; Bariche, M; Broglio, E; Andaloro, F	New records of the silver-cheeked toadfish Lagocephalus sceleratus (Gmelin, 1789) in the Tyrrhenian and Ionian Seas: early detection and participatory monitoring in practice	BIOINVASIONS RECORDS	5	295	10.3391/bir.2016.5.4.16	2016	2242-1300
Hanslin, HM; Kollmann, J	Positive responses of coastal dune plants to soil conditioning by the invasive Lupinus nootkatensis	ACTA OECOLOGICA-INTERNATIONAL JOURNAL OF ECOLOGY	77	1	10.1016/j.actao.2016.08.007	2016	1146-609X
Venkataraman, K; Raghunathan, C; Satyanarayana, C; Rajkumar, R	Invasion of Snowflake Coral, Carijoa riisei (Duchassaing and Michelotti, 1860), in Indian Seas: Threats to Coral Reef Ecosystem	INDIAN JOURNAL OF GEO-MARINE SCIENCES	45	1403		2016	0379-5136
Kollar, P; Smejkal, K; Salmonova, H; Vlkova, E; Lepsova-Skacelova, O; Balounova, Z; Rajchard, J; Cvacka, J; Jasa, L; Babica, P; Pazourek, J	Assessment of Chemical Impact of Invasive Bryozoan Pectinatella magnifica on the Environment: Cytotoxicity and Antimicrobial Activity of P. magnifica Extracts	MOLECULES	21		10.3390/molecules21111476	2016	1420-3049
Buschbaum, C; Cornelius, A; Goedknegt, MA	Deeply hidden inside introduced biogenic structures - Pacific oyster reefs reduce detrimental barnacle overgrowth on native blue mussels	JOURNAL OF SEA RESEARCH	117	20	10.1016/j.seares.2016.09.002	2016	1385-1101
Sakamoto, Y; Mori, H; Ohnishi, H; Imai, H; Kishimoto, T; Toda, M; Kishi, S; Goka, K	Surveys of the ant faunas at ports of Tokyo Bay and the Ogasawara Islands	APPLIED ENTOMOLOGY AND ZOOLOGY	51	661	10.1007/s13355-016-0444-1	2016	0003-6862
Yang, W; Yan, YE; Jiang, F; Leng, X; Cheng, XL; An, SQ	Response of the soil microbial community composition and biomass to a short-term Spartina alterniflora invasion in a coastal wetland of eastern China	PLANT AND SOIL	408	443	10.1007/s11104-016-2941-y	2016	0032-079X
Lester, PJ; Gruber, MAM	Booms, busts and population collapses in invasive ants	BIOLOGICAL INVASIONS	18	3091	10.1007/s10530-016-1214-2	2016	1387-3547
Brooks, PR; Nairn, R; Harris, M; Jeffrey, D; Crowe, TP	Dublin Port and Dublin Bay: Reconnecting with nature and people	REGIONAL STUDIES IN MARINE SCIENCE	8	234	10.1016/j.rsma.2016.03.007	2016	2352-4855
Hixon, MA; Green, SJ; Albins, MA; Akins, JL; Morris, JA	Lionfish: a major marine invasion	MARINE ECOLOGY PROGRESS SERIES	558	161	10.3354/meps11909	2016	0171-8630
Palmer, G; Hogan, JD; Sterba-Boatwright, BD; Overath, RD	Invasive lionfish Pterois volitans reduce the density but not the genetic diversity of a native reef fish	MARINE ECOLOGY PROGRESS SERIES	558	223	10.3354/meps11924	2016	0171-8630
Kindinger, TL; Anderson, ER	Preferences of invasive lionfish and native grouper between congeneric prey fishes	MARINE ECOLOGY PROGRESS SERIES	558	247	10.3354/meps11833	2016	0171-8630
Ellis, RD; Faletti, ME	Native grouper indirectly ameliorates the negative effects of invasive lionfish	MARINE ECOLOGY PROGRESS SERIES	558	267	10.3354/meps11808	2016	0171-8630
Zwerschke, N; Emmerson, MC; Roberts, D; O'Connor, NE	Benthic assemblages associated with native and non-native oysters are similar	MARINE POLLUTION BULLETIN	111	305	10.1016/j.marpolbul.2016.06.094	2016	0025-326X
Miyazawa, Y; Dudley, BD; Hughes, RF; Vandemark, J; Cordell, S; Nullet, MA; Ostertag, R; Giambelluca, TW	Non-native tree in a dry coastal area in Hawai'i has high transpiration but restricts water use despite phreatophytic trait	ECOHYDROLOGY	9	1166	10.1002/eco.1715	2016	1936-0584
Choy, ES; Roth, JD; Loseto, LL	Lipid removal and acidification affect nitrogen and carbon stable isotope ratios of beluga whales (Delphinapterus leucas) and their potential prey species in the Beaufort Sea ecosystem	MARINE BIOLOGY	163		10.1007/s00227-016-2992-x	2016	0025-3162
Johnson, J; Bird, CE; Johnston, MA; Fogg, AQ; Hogan, JD	Regional genetic structure and genetic founder effects in the invasive lionfish: comparing the Gulf of Mexico, Caribbean and North Atlantic	MARINE BIOLOGY	163		10.1007/s00227-016-2981-0	2016	0025-3162
Benkwitt, CE	Central-place foraging and ecological effects of an invasive predator across multiple habitats	ECOLOGY	97	2729	10.1002/ecy.1477	2016	0012-9658
Chappell, BF; Smith, KG	Patterns of predation of native reef fish by invasive Indo-Pacific lionfish in the western Atlantic: Evidence of selectivity by a generalist predator	GLOBAL ECOLOGY AND CONSERVATION	8	18	10.1016/j.gecco.2016.08.002	2016	2351-9894
Novais, A; Souza, AT; Ilarri, M; Pascoal, C; Sousa, R	Effects of the invasive clam Corbicula fluminea (Muller, 1774) on an estuarine microbial community	SCIENCE OF THE TOTAL ENVIRONMENT	566	1168	10.1016/j.scitotenv.2016.05.167	2016	0048-9697
Manriquez, PH; Castilla, JC; Ortiz, V; Jara, ME	Empirical evidence for large-scale human impact on intertidal aggregations, larval supply and recruitment of Pyura praeputialis around the Bay of Antofagasta, Chile	AUSTRAL ECOLOGY	41	701	10.1111/aec.12359	2016	1442-9985
Hughes, AR; Schenck, FR; Bloomberg, J; Hanley, TC; Feng, DM; Gouhier, TC; Beighley, RE; Kimbro, DL	Biogeographic gradients in ecosystem processes of the invasive ecosystem engineer Phragmites australis	BIOLOGICAL INVASIONS	18	2577	10.1007/s10530-016-1143-0	2016	1387-3547
Mueller, P; Hager, RN; Meschter, JE; Mozdzer, TJ; Langley, JA; Jensen, K; Megonigal, JP	Complex invader-ecosystem interactions and seasonality mediate the impact of non-native Phragmites on CH4 emissions	BIOLOGICAL INVASIONS	18	2635	10.1007/s10530-016-1093-6	2016	1387-3547
Bruschetti, M; Luppi, T; Iribarne, O	Effect of an invasive filter-feeder on the zooplankton assemblage in a coastal lagoon	JOURNAL OF THE MARINE BIOLOGICAL ASSOCIATION OF THE UNITED KINGDOM	96	1201	10.1017/S0025315415001320	2016	0025-3154
Zhang, DL; Ye, Z; Yamada, K; Zhen, YH; Zheng, CG; Bu, WJ	Pleistocene sea level fluctuation and host plant habitat requirement influenced the historical phylogeography of the invasive species Amphiareus obscuriceps (Hemiptera: Anthocoridae) in its native range	BMC EVOLUTIONARY BIOLOGY	16		10.1186/s12862-016-0748-3	2016	1471-2148
Palomo, MG; Bagur, M; Quiroga, M; Soria, S; Bugnot, A	Ecological impacts of two non-indigenous macroalgae on an urban rocky intertidal shore	MARINE BIOLOGY	163		10.1007/s00227-016-2951-6	2016	0025-3162
Goren, M; Galil, BS; Diamant, A; Stern, N; Levitt-Barmats, Y	Invading up the food web? Invasive fish in the southeastern Mediterranean Sea	MARINE BIOLOGY	163		10.1007/s00227-016-2950-7	2016	0025-3162
Pourang, N; Eslami, F; Saravi, HN; Fazli, H	Strong biopollution in the southern Caspian Sea: the comb jelly Mnemiopsis leidyi case study	BIOLOGICAL INVASIONS	18	2403	10.1007/s10530-016-1171-9	2016	1387-3547
Mirzajani, A; Hamidian, AH; Bagheri, S; Karami, M	Possible effect of Balanus improvisus on Cerastoderma glaucum distribution in the south-western Caspian Sea	JOURNAL OF THE MARINE BIOLOGICAL ASSOCIATION OF THE UNITED KINGDOM	96	1031	10.1017/S0025315415000788	2016	0025-3154
Shimeta, J; Saint, L; Verspaandonk, ER; Nugegoda, D; Howe, S	Long-term ecological consequences of herbicide treatment to control the invasive grass, Spartina anglica, in an Australian saltmarsh	ESTUARINE COASTAL AND SHELF SCIENCE	176	58	10.1016/j.ecss.2016.04.010	2016	0272-7714
Adzim, CA; Billah, MK; Afreh-Nuamah, K	Abundance of African invader fly, Bactrocera invadens drew, tsuruta and white (diptera: tephritidae) and influence of weather parameters on trap catches in mango in the Volta region of Ghana	SPRINGERPLUS	5		10.1186/s40064-016-2644-0	2016	2193-1801
Schrandt, MN; Stone, LC; Klimek, B; Makelin, S; Heck, KL; Mattila, J; Herlevi, H	A laboratory study of potential effects of the invasive round goby on nearshore fauna of the Baltic Sea	AQUATIC INVASIONS	11	327	10.3391/ai.2016.11.3.10	2016	1798-6540
Foard, M; Burnette, DJ; Burge, DRL; Marsico, TD	Influence of river channelization and the invasive shrub, Ligustrum sinense, on oak (Quercus spp.) growth rates in bottomland hardwood forests	APPLIED VEGETATION SCIENCE	19	401	10.1111/avsc.12240	2016	1402-2001
Cecere, E; Petrocelli, A; Belmonte, M; Portacci, G; Rubino, F	Activities and vectors responsible for the biological pollution in the Taranto Seas (Mediterranean Sea, southern Italy): a review	ENVIRONMENTAL SCIENCE AND POLLUTION RESEARCH	23	12797	10.1007/s11356-015-5056-8	2016	0944-1344
Zalewski, A; Zalewska, H; Lunneryd, SG; Andre, C; Mikusinski, G	Reduced Genetic Diversity and Increased Structure in American Mink on the Swedish Coast following Invasive Species Control	PLOS ONE	11		10.1371/journal.pone.0157972	2016	1932-6203
Como, S; Pais, A; Rumolo, P; Saba, S; Sprovieri, M; Magni, P	Effects of an invasive mussel, Arcuatula senhousia, on local benthic consumers: a laboratory C-13-labeling study	MARINE BIOLOGY	163		10.1007/s00227-016-2912-0	2016	0025-3162
Pennoyer, KE; Himes, AR; Frederich, M	Effects of sex and color phase on ion regulation in the invasive European green crab, Carcinus maenas	MARINE BIOLOGY	163		10.1007/s00227-016-2910-2	2016	0025-3162
Smith, JR	The putative impacts of the non-native seaweed Sargassum muticum on native communities in tidepools of Southern California and investigation into the feasibility of local eradication	MARINE ECOLOGY-AN EVOLUTIONARY PERSPECTIVE	37	645	10.1111/maec.12335	2016	0173-9565
Newton, KM; McKown, M; Wolf, C; Gellerman, H; Coonan, T; Richards, D; Harvey, AL; Holmes, N; Howald, G; Faulkner, K; Tershy, BR; Croll, DA	Response of Native Species 10 Years After Rat Eradication on Anacapa Island, California	JOURNAL OF FISH AND WILDLIFE MANAGEMENT	7	72	10.3996/082015-JFWM-073	2016	1944-687X
Boets, P; Brosens, D; Lock, K; Adriaens, T; Aelterman, B; Mertens, J; Goethals, PLM	Alien macroinvertebrates in Flanders (Belgium)	AQUATIC INVASIONS	11	131	10.3391/ai.2016.11.2.03	2016	1798-6540
Katsanevakis, S; Tempera, F; Teixeira, H	Mapping the impact of alien species on marine ecosystems: the Mediterranean Sea case study	DIVERSITY AND DISTRIBUTIONS	22	694	10.1111/ddi.12429	2016	1366-9516
Fitoussi, N; Pen-Mouratov, S; Steinberger, Y	Soil free-living nematodes as bio-indicators for assaying the invasive effect of the alien plant Heterotheca subaxillaris in a coastal dune ecosystem	APPLIED SOIL ECOLOGY	102	1	10.1016/j.apsoil.2016.02.005	2016	0929-1393
Simpson, TS; Wernberg, T; McDonald, JI	Distribution and Localised Effects of the Invasive Ascidian Didemnum perlucidum (Monniot 1983) in an Urban Estuary	PLOS ONE	11		10.1371/journal.pone.0154201	2016	1932-6203
Cano, L; Fuertes-Mendizabal, T; Garcia-Baquero, G; Herrera, M; Gonzalez-Moro, MB	Plasticity to salinity and transgenerational effects in the nonnative shrub Baccharis halimifolia: Insights into an estuarine invasion	AMERICAN JOURNAL OF BOTANY	103	808	10.3732/ajb.1500477	2016	0002-9122
Langer, MR; Mouanga, GH	Invasion of amphisteginid foraminifera in the Adriatic Sea	BIOLOGICAL INVASIONS	18	1335	10.1007/s10530-016-1070-0	2016	1387-3547
Jormalainen, V; Gagnon, K; Sjoroos, J; Rothausler, E	The invasive mud crab enforces a major shift in a rocky littoral invertebrate community of the Baltic Sea	BIOLOGICAL INVASIONS	18	1409	10.1007/s10530-016-1090-9	2016	1387-3547
Alexander, ME; Simon, CA; Griffiths, CL; Peters, K; Sibanda, S; Miza, S; Groenewald, B; Majiedt, P; Sink, KJ; Robinson, TB	Back to the future: reflections and directions of South African marine bioinvasion research	AFRICAN JOURNAL OF MARINE SCIENCE	38	141	10.2989/1814232X.2016.1159984	2016	1814-232X
Gerovasileiou, V; Voultsiadou, E; Issaris, Y; Zenetos, A	Alien biodiversity in Mediterranean marine caves	MARINE ECOLOGY-AN EVOLUTIONARY PERSPECTIVE	37	239	10.1111/maec.12268	2016	0173-9565
Grosse-Stoltenberg, A; Hellmann, C; Werner, C; Oldeland, J; Thiele, J	Evaluation of Continuous VNIR-SWIR Spectra versus Narrowband Hyperspectral Indices to Discriminate the Invasive Acacia longifolia within a Mediterranean Dune Ecosystem	REMOTE SENSING	8		10.3390/rs8040334	2016	2072-4292
Hewitt, JE; Norkko, J; Kauppi, L; Villnas, A; Norkko, A	Species and functional trait turnover in response to broad-scale change and an invasive species	ECOSPHERE	7		10.1002/ecs2.1289	2016	2150-8925
McKenzie, CH; Matheson, K; Caines, S; Wells, T	Surveys for non-indigenous tunicate species in Newfoundland, Canada (2006-2014): a first step towards understanding impact and control	MANAGEMENT OF BIOLOGICAL INVASIONS	7	21	10.3391/mbi.2016.7.1.04	2016	1989-8649
Colarusso, P; Nelson, E; Ayvazian, S; Carman, MR; Chintala, M; Grabbert, S; Grunden, D	Quantifying the ecological impact of invasive tunicates to shallow coastal water systems	MANAGEMENT OF BIOLOGICAL INVASIONS	7	33	10.3391/mbi.2016.7.1.05	2016	1989-8649
Salomidi, M; Giakoumi, S; Gerakaris, V; Issaris, Y; Sini, M; Tsiamis, K	Setting an ecological baseline prior to the bottom-up establishment of a marine protected area in Santorini Island, Aegean Sea	MEDITERRANEAN MARINE SCIENCE	17	720	10.12681/mms.1802	2016	1108-393X
Arredondo-Chavez, AT; Sanchez-Jimenez, JA; Avila-Morales, OG; Torres-Chavez, P; Herrerias-Diego, Y; Medina-Nava, M; Madrigal-Guridi, X; Campos-Mendoza, A; Dominguez-Dominguez, O; Caballero-Vazquez, JA	SPATIO-TEMPORAL VARIATION IN THE DIET COMPOSITION OF RED LIONFISH, PTEROIS VOLITANS (ACTINOPTERYGII: SCORPAENIFORMES: SCORPAENIDAE), IN THE MEXICAN CARIBBEAN: INSIGHTS INTO THE ECOLOGICAL EFFECT OF THE ALIEN INVASION	ACTA ICHTHYOLOGICA ET PISCATORIA	46	185	10.3750/AIP2016.46.3.03	2016	0137-1592
Wilson, JJ; Grendler, J; Dunlap-Smith, A; Beal, BF; Page, ST	Analysis of Gene Expression in an Inbred Line of Soft-Shell Clams (Mya arenaria) Displaying Growth Heterosis: Regulation of Structural Genes and the NOD2 Pathway	INTERNATIONAL JOURNAL OF GENOMICS			10.1155/2016/6720947	2016	2314-436X
Ounifi-Ben Amor, K; Rifi, M; Ghanem, R; Draief, I; Zaouali, J; Ben Souissi, J	Update of alien fauna and new records from Tunisian marine waters	MEDITERRANEAN MARINE SCIENCE	17	124		2016	1108-393X
Krupek, A.; Gaertner, M.; Holmes, P. M.; Esler, K. J.	Assessment of post-burn removal methods for Acacia saligna in Cape Flats Sand Fynbos, with consideration of indigenous plant recovery	SOUTH AFRICAN JOURNAL OF BOTANY		211		2016	0254-6299
Pattison, Z.; Rumble, H.; Tanner, R. A.; Jin, L.; Gange, A. C.	Positive plant-soil feedbacks of the invasive Impatiens glandulifera and their effects on above-ground microbial communities	WEED RESEARCH		198	10.1111/wre.12200	2016	0043-1737
De La Riva, Deborah G; Trumble, John T	Selenium exposure results in reduced reproduction in an invasive ant species and altered competitive behavior for a native ant species.	Environmental pollution (Barking, Essex : 1987)		888	10.1016/j.envpol.2016.03.045	2016
Gazol, Antonio; Zobel, Martin; Cantero, Juan Jose; Davison, John; Esler, Karen J; Jairus, Teele; Opik, Maarja; Vasar, Martti; Moora, Mari	Impact of alien pines on local arbuscular mycorrhizal fungal communities-evidence from two continents.	FEMS microbiology ecology			10.1093/femsec/fiw073	2016
Dai, Zhi-Cong; Fu, Wei; Wan, Ling-Yun; Cai, Hong-Hong; Wang, Ning; Qi, Shan-Shan; Du, Dao-Lin	Different Growth Promoting Effects of Endophytic Bacteria on Invasive and Native Clonal Plants	FRONTIERS IN PLANT SCIENCE			10.3389/f,ols.2016.00706	2016	1664-462X
Ziemba, Julie L.; Hickerson, Cari-Ann M.; Anthony, Carl D.	Invasive Asian Earthworms Negatively Impact Keystone Terrestrial Salamanders	PLOS ONE			10.1371/journal.pone.0151591	2016	1932-6203
Siers, Shane R.; Reed, Robert N.; Savidge, Julie A.	To cross or not to cross: modeling wildlife road crossings as a binary response variable with contextual predictors	ECOSPHERE		1292		2016	2150-8925
Cameron, Erin K.; Vila, Montserrat; Cabeza, Mar	Global meta-analysis of the impacts of terrestrial invertebrate invaders on species, communities and ecosystems	GLOBAL ECOLOGY AND BIOGEOGRAPHY		596	10.1111/geb.12436	2016	1466-822X
Pearson, Dean E.; Ortega, Yvette K.; Runyon, Justin B.; Butler, Jack L.	Secondary invasion: The bane of weed management	BIOLOGICAL CONSERVATION		8	10.1016/j.biocon.2016.02.029	2016	0006-3207
Lososova, Zdenka; Chytry, Milan; Danihelka, Jiri; Tichy, Lubomir; Ricotta, Carlo	Biotic homogenization of urban floras by alien species: the role of species turnover and richness differences	JOURNAL OF VEGETATION SCIENCE		452	10.1111/jvs.12381	2016	1100-9233
Ramanantoanina, Andriamihaja; Hui, Cang	Formulating spread of species with habitat dependent growth and dispersal in heterogeneous landscapes	MATHEMATICAL BIOSCIENCES		51	10.1016/j.mbs.2016.02.013	2016	0025-5564
Young, Hillary S.; Dirzo, Rodolfo; Helgen, Kristofer M.; McCauley, Douglas J.; Nunn, Charles L.; Snyder, Paul; Veblen, Kari E.; Zhao, Serena; Ezenwa, Vanessa O.	Large wildlife removal drives immune defence increases in rodents	FUNCTIONAL ECOLOGY		799	10.1111/1365-2435.12542	2016	0269-8463
Shackleton, Ross T.; Le Maitre, David C.; van Wilgen, Brian W.; Richardson, David M.	Identifying barriers to effective management of widespread invasive alien trees: Prosopis species (mesquite) in South Africa as a case study	GLOBAL ENVIRONMENTAL CHANGE-HUMAN AND POLICY DIMENSIONS		183	10.1016/j.gloenvcha.2016.03.012	2016	0959-3780
Douglass, Cameron H.; Nissen, Scott J.; Meiman, Paul J.; Kniss, Andrew R.	Impacts of Imazapyr and Triclopyr Soil Residues on the Growth of Several Restoration Species	RANGELAND ECOLOGY & MANAGEMENT		199	10.1016/j.rama.2016.01.006	2016	1550-7424
Manea, Anthony; Sloane, Daniel R.; Leishman, Michelle R.	Reductions in native grass biomass associated with drought facilitates the invasion of an exotic grass into a model grassland system	OECOLOGIA		175	10.1007/s00442-016-3553-1	2016	0029-8549
Guthrie, Shannon G.; Crandall, Raelene M.; Knight, Tiffany M.	Fire indirectly benefits fitness in two invasive species	BIOLOGICAL INVASIONS		1265	10.1007/s10530-016-1064-y	2016	1387-3547
Dai, Zhi-Cong; Wang, Xiao-Ying; Qi, Shan-Shan; Cai, Hong-Hong; Sun, Jian-Fan; Huang, Ping; Du, Dao-Lin	Effects of leaf litter on inter-specific competitive ability of the invasive plant Wedelia trilobata	ECOLOGICAL RESEARCH		367	10.1007/s11284-016-1344-0	2016	0912-3814
Huang, Fangfang; Peng, Shaolin	Intraspecific competitive ability declines towards the edge of the expanding range of the invasive vine Mikania micrantha	OECOLOGIA		115	10.1007/s00442-015-3526-9	2016	0029-8549
Dunphy, Shannon A. Meadley; Prior, Kirsten M.; Frederickson, Megan E.	An invasive slug exploits an ant-seed dispersal mutualism	OECOLOGIA		149	10.1007/s00442-015-3530-0	2016	0029-8549
Jones, Holly P.; Holmes, Nick D.; Butchart, Stuart H. M.; Tershy, Bernie R.; Kappes, Peter J.; Corkery, Ilse; Aguirre-Munoz, Alfonso; Armstrong, Doug P.; Bonnaud, Elsa; Burbidge, Andrew A.; Campbell, Karl; Courchamp, Franck; Cowan, Philip E.; Cuthbert, Richard J.; Ebbert, Steve; Genovesi, Piero; Howald, Gregg R.; Keitt, Bradford S.; Kress, Stephen W.; Miskelly, Colin M.; Oppel, Steffen; Poncet, S…	Invasive mammal eradication on islands results in substantial conservation gains	PROCEEDINGS OF THE NATIONAL ACADEMY OF SCIENCES OF THE UNITED STATES OF AMERICA		4033	10.1073/pnas.1521179113	2016	0027-8424
Drygala, Frank; Korablev, Nikolay; Ansorge, Hermann; Fickel, Joerns; Isomursu, Marja; Elmeros, Morten; Kowalczyk, Rafal; Baltrunaite, Laima; Balciauskas, Linas; Saarma, Urmas; Schulze, Christoph; Borkenhagen, Peter; Frantz, Alain C.	Homogenous Population Genetic Structure of the Non-Native Raccoon Dog (Nyctereutes procyonoides) in Europe as a Result of Rapid Population Expansion	PLOS ONE			10.1371/journal.pone.0153098	2016	1932-6203
Farris, Zach J.; Boone, Hailey M.; Karpanty, Sarah; Murphy, Asia; Ratelolahy, Felix; Andrianjakarivelo, Vonjy; Kelly, Marcella J.	Feral cats and the fitoaty: first population assessment of the black forest cat in Madagascar's rainforests	JOURNAL OF MAMMALOGY		518	10.1093/jmammal/gyv196	2016	0022-2372
Heberling, J. Mason; Fridley, Jason D.	Invaders do not require high resource levels to maintain physiological advantages in a temperate deciduous forest	ECOLOGY		874	10.1890/15-1659.1	2016	0012-9658
Farris, Z. J.; Kelly, M. J.; Karpanty, S.; Ratelolahy, F.	Patterns of spatial co-occurrence among native and exotic carnivores in north-eastern Madagascar	ANIMAL CONSERVATION		189	10.1111/acv.12233	2016	1367-9430
Kelemen, Andras; Valko, Orsolya; Kroeel-Dulay, Gyoergy; Deak, Balazs; Toeroek, Peter; Toth, Katalin; Miglecz, Tamas; Tothmeresz, Bela	The invasion of common milkweed (Asclepias syriaca) in sandy old-fields - is it a threat to the native flora?	APPLIED VEGETATION SCIENCE		218	10.1111/avsc.12225	2016	1402-2001
Holland, E. Penelope; Gormley, Andrew M.; Pech, Roger P.	Species- and site-specific impacts of an invasive herbivore on tree survival in mixed forests	ECOLOGY AND EVOLUTION		1954	10.1002/ece3.2002	2016	2045-7758
Garnas, Jeff R.; Auger-Rozenberg, Marie-Anne; Roques, Alain; Bertelsmeier, Cleo; Wingfield, Michael J.; Saccaggi, Davina L.; Roy, Helen E.; Slippers, Bernard	Complex patterns of global spread in invasive insects: eco-evolutionary and management consequences	BIOLOGICAL INVASIONS		935	10.1007/s10530-016-1082-9	2016	1387-3547
Saccaggi, Davina L.; Karsten, Minette; Robertson, Mark P.; Kumschick, Sabrina; Somers, Michael J.; Wilson, John R. U.; Terblanche, John S.	Methods and approaches for the management of arthropod border incursions	BIOLOGICAL INVASIONS		1057	10.1007/s10530-016-1085-6	2016	1387-3547
Cheng, Daifeng; Liang, Guangwen; Xu, Yijuan	Meta-analysis reveals asymmetric reduction in the genetic diversity of introduced populations of exotic insects	BIOLOGICAL INVASIONS		1163	10.1007/s10530-016-1058-9	2016	1387-3547
Korell, Lotte; Schmidt, Robin; Bruelheide, Helge; Hensen, Isabell; Auge, Harald	Mechanisms driving diversity-productivity relationships differ between exotic and native communities and are affected by gastropod herbivory	OECOLOGIA		1025	10.1007/s00442-015-3395-2	2016	0029-8549
Rouget, Mathieu; Robertson, Mark P.; Wilson, John R. U.; Hui, Cang; Essl, Franz; Renteria, Jorge L.; Richardson, David M.	Invasion debt - quantifying future biological invasions	DIVERSITY AND DISTRIBUTIONS		445	10.1111/ddi.12408	2016	1366-9516
Jones, Benjamin A.	Work more and play less? Time use impacts of changing ecosystem services: The case of the invasive emerald ash borer	ECOLOGICAL ECONOMICS		49	10.1016/j.ecolecon.2016.02.003	2016	0921-8009
Stricker, Kerry Bohl; Harmon, Philip F.; Goss, Erica M.; Clay, Keith; Flory, S. Luke	Emergence and accumulation of novel pathogens suppress aninvasive species	ECOLOGY LETTERS		469	10.1111/ele.12583	2016	1461-023X
Cajaiba, R. L.; Cabral, J. A.; Santos, M.	A Minimal Invasive Method to Forecast the Effects of Anthropogenic Disturbance on Tropical Cave Beetle Communities	NEOTROPICAL ENTOMOLOGY		139	10.1007/s13744-015-0349-7	2016	1519-566X
Barahona-Segovia, Rodrigo M.; Grez, Audrey A.; Bozinovic, Francisco	Testing the hypothesis of greater eurythermality in invasive than in native ladybird species: from physiological performance to life-history strategies	ECOLOGICAL ENTOMOLOGY		182	10.1111/een.12287	2016	0307-6946
Wang, Congyan; Xiao, Hongguang; Zhao, Lulu; Liu, Jun; Wang, Lei; Zhang, Fei; Shi, Yanchun; Du, Daolin	The allelopathic effects of invasive plant Solidago canadensis on seed germination and growth of Lactuca sativa enhanced by different types of acid deposition	ECOTOXICOLOGY		555	10.1007/s10646-016-1614-1	2016	0963-9292
Hall, Lucas K.; Larsen, Randy T.; Westover, Matthew D.; Day, Casey C.; Knight, Robert N.; McMillan, Brock R.	Influence of exotic horses on the use of water by communities of native wildlife in a semi-arid environment	JOURNAL OF ARID ENVIRONMENTS		100	10.1016/j.jaridenv.2015.11.008	2016	0140-1963
Tingle, Jessica L.; Cook-Patton, Susan C.; Agrawal, Anurag A.	Spillover of a biological control agent (Chrysolina quadrigemina) onto native St. Johnswort (Hypericum punctatum)	PEERJ			10.7717/peerj.1886	2016	2167-8359
Marchowski, Dominik; Neubauer, Grzegorz; Lawicki, Lukasz; Wozniczka, Adam; Wysocki, Dariusz; Guentzel, Sebastian; Jarzemski, Maciej	The Importance of Non-Native Prey, the Zebra Mussel Dreissena polymorpha, for the Declining Greater Scaup Aythya marila: A Case Study at a Key European Staging and Wintering Site (vol 10, e0145496, 2015)	PLOS ONE			10.1371/journal.pone.0152543	2016	1932-6203
Mello, Thayna Jeremias; de Oliveira, Alexandre Adalardo	Making a Bad Situation Worse: An Invasive Species Altering the Balance of Interactions between Local Species	PLOS ONE			10.1371/journal.pone.0152070	2016	1932-6203
Tolvanen, Anne; Kangas, Katja	Tourism, biodiversity and protected areas - Review from northern Fennoscandia	JOURNAL OF ENVIRONMENTAL MANAGEMENT		58	10.1016/j.jenvman.2015.12.011	2016	0301-4797
McConnachie, Matthew M.; van Wilgen, Brian W.; Ferraro, Paul J.; Forsyth, Aurelia T.; Richardson, David M.; Gaertner, Mirijam; Cowling, Richard M.	Using counterfactuals to evaluate the cost-effectiveness of controlling biological invasions	ECOLOGICAL APPLICATIONS		475	10.1890/15-0351.1	2016	1051-0761
Paudel, Shishir; Longcore, Travis; MacDonald, Beau; McCormick, Melissa K.; Szlavecz, Katalin; Wilson, Gail W. T.; Loss, Scott R.	Belowground interactions with aboveground consequences: Invasive earthworms and arbuscular mycorrhizal fungi	ECOLOGY		605	10.1890/15-1085	2016	0012-9658
Crocker, Ellen V.; Lanzafane, Justin J.; Karp, Mary Ann; Nelson, Eric B.	Overwintering seeds as reservoirs for seedling pathogens of wetland plant species	ECOSPHERE			10.1002/ecs2.1281	2016	2150-8925
Smith, C. L.	The effects of climate change on the invasive alien plant Hypericum pseudohenryi in South Africa	SOUTH AFRICAN JOURNAL OF BOTANY		350	10.1016/j.sajb.2016.02.174	2016	0254-6299
Griffen, Blaine D.	Scaling the consequences of interactions between invaders from the individual to the population level	ECOLOGY AND EVOLUTION		1769	10.1002/ece3.2008	2016	2045-7758
Sitzia, Tommaso; Campagnaro, Thomas; Weir, Robert George	Novel woodland patches in a small historical Mediterranean city: Padova, Northern Italy	URBAN ECOSYSTEMS		475	10.1007/s11252-015-0475-3	2016	1083-8155
Packer, Jasmin G.; Delean, Steve; Kueffer, Christoph; Prider, Jane; Abley, Kirstin; Facelli, Jose M.; Carthew, Susan M.	Native faunal communities depend on habitat from non-native plants in novel but not in natural ecosystems	BIODIVERSITY AND CONSERVATION		503	10.1007/s10531-016-1059-0	2016	0960-3115
Chollet, Simon; Padie, Sophie; Stockton, Stephen; Allombert, Sylvain; Gaston, Anthony J.; Martin, Jean-Louis	Positive plant and bird diversity response to experimental deer population reduction after decades of uncontrolled browsing	DIVERSITY AND DISTRIBUTIONS		274	10.1111/ddi.12393	2016	1366-9516
Tingley, Reid; Thompson, Michael B.; Hartley, Stephen; Chapple, David G.	Patterns of niche filling and expansion across the invaded ranges of an Australian lizard	ECOGRAPHY		270	10.1111/ecog.01576	2016	0906-7590
Barton, Philip S.; Sato, Chloe F.; Kay, Geoffrey M.; Florance, Daniel; Lindenmayer, David B.	Effects of environmental variation and livestock grazing on ant community structure in temperate eucalypt woodlands	INSECT CONSERVATION AND DIVERSITY		124	10.1111/icad.12151	2016	1752-458X
Khaliq, A.; Aslam, F.; Matloob, A.; Javaid, A.; Tanveer, A.; Hussain, S.; Ihsan, M. Z.	PHYTOTOXIC ACTIVITY OF PARTHENIUM AGAINST WHEAT AND CANOLA DIFFER WITH PLANT PARTS AND BIOASSAYS TECHNIQUES	PLANTA DANINHA		11	10.1590/S0100-83582016340100002	2016	0100-8358
Liu, Xuan; Guo, Yisong; Luo, Yu; Li, Yiming	Emergent Vegetation Coverage and Human Activities Influence Oviposition Microhabitat Selection by Invasive Bullfrogs (Lithobates catesbeianus) in Southwestern China	JOURNAL OF HERPETOLOGY		57	10.1670/14-151	2016	0022-1511
Maceda-Veiga, Alberto; Basas, Helena; Lanzaco, Gerard; Sala, Miquel; de Sostoa, Adolfo; Serra, Antoni	Impacts of the invader giant reed (Arundo donax) on riparian habitats and ground arthropod communities	BIOLOGICAL INVASIONS		731	10.1007/s10530-015-1044-7	2016	1387-3547
Meserve, Peter L.; Kelt, Douglas A.; Gutierrez, Julio R.; Andrea Previtali, M.; Milstead, W. Bryan	Biotic interactions and community dynamics in the semiarid thorn scrub of Bosque Fray Jorge National Park, north-central Chile: A paradigm revisited	JOURNAL OF ARID ENVIRONMENTS		81	10.1016/j.jaridenv.2015.08.016	2016	0140-1963
McCary, Matthew A.; Mores, Robin; Farfan, Monica A.; Wise, David H.	Invasive plants have different effects on trophic structure ofgreen and brown food webs in terrestrial ecosystems: a meta-analysis	ECOLOGY LETTERS		328	10.1111/ele.12562	2016	1461-023X
Acosta, Andre L.; Giannini, Tereza C.; Imperatriz-Fonseca, Vera L.; Saraiva, Antonio M.	Worldwide Alien Invasion: A Methodological Approach to Forecast the Potential Spread of a Highly Invasive Pollinator	PLOS ONE			10.1371/journal.pone.0148295	2016	1932-6203
Sikes, Benjamin A.; Hawkes, Christine V.; Fukami, Tadashi	Plant and root endophyte assembly history: interactive effects on native and exotic plants	ECOLOGY		484	10.1890/15-0635.1	2016	0012-9658
Herron-Sweet, Christina R.; Lehnhoff, Erik A.; Burkle, Laura A.; Littlefield, Jeffrey L.; Mangold, Jane M.	Temporal- and density-dependent impacts of an invasive plant on pollinators and pollination services to a native plant	ECOSPHERE			10.1002/ecs2.1233	2016	2150-8925
Russo, Laura; Nichol, Christina; Shea, Katriona	Pollinator floral provisioning by a plant invader: quantifying beneficial effects of detrimental species	DIVERSITY AND DISTRIBUTIONS		189	10.1111/ddi.12397	2016	1366-9516
Dostalek, Tomas; Muenzbergova, Zuzana; Kladivova, Anna; Macel, Mirka	Plant-soil feedback in native vs. invasive populations of a range expanding plant	PLANT AND SOIL		209	10.1007/s11104-015-2688-x	2016	0032-079X
Maoela, Malebajoa A.; Roets, Francois; Jacobs, Shayne M.; Esler, Karen J.	Restoration of invaded Cape Floristic Region riparian systems leads to a recovery in foliage-active arthropod alpha- and beta-diversity	JOURNAL OF INSECT CONSERVATION		85	10.1007/s10841-015-9842-x	2016	1366-638X
Schmiedel, Doreen; Wilhelm, Eckehard-G.; Roth, Mechthild; Scheibner, Cornelia; Nehring, Stefan; Winter, Susanne	Evaluation system for management measures of invasive alien species	BIODIVERSITY AND CONSERVATION		357	10.1007/s10531-016-1054-5	2016	0960-3115
Pauchard, Anibal; Milbau, Ann; Albihn, Ann; Alexander, Jake; Burgess, Treena; Daehler, Curtis; Englund, Goran; Essl, Franz; Evengard, Birgitta; Greenwood, Gregory B.; Haider, Sylvia; Lenoir, Jonathan; McDougall, Keith; Muths, Erin; Nunez, Martin A.; Olofsson, Johan; Pellissier, Loic; Rabitsch, Wolfgang; Rew, Lisa J.; Robertson, Mark; Sanders, Nathan; Kueffer, Christoph	Non-native and native organisms moving into high elevation and high latitude ecosystems in an era of climate change: new challenges for ecology and conservation	BIOLOGICAL INVASIONS		345	10.1007/s10530-015-1025-x	2016	1387-3547
Case, E. J.; Harrison, S.; Cornell, H. V.	After an invasion: understanding variation in grassland community recovery following removal of a high-impact invader	BIOLOGICAL INVASIONS		371	10.1007/s10530-015-1009-x	2016	1387-3547
Oelofse, Myles; Birch-Thomsen, Torben; Magid, Jakob; de Neergaard, Andreas; van Deventer, Ross; Bruun, Sander; Hill, Trevor	The impact of black wattle encroachment of indigenous grasslands on soil carbon, Eastern Cape, South Africa	BIOLOGICAL INVASIONS		445	10.1007/s10530-015-1017-x	2016	1387-3547
Bengsen, A. J.; Algar, D.; Ballard, G.; Buckmaster, T.; Comer, S.; Fleming, P. J. S.; Friend, J. A.; Johnston, M.; McGregor, H.; Moseby, K.; Zewe, F.	Feral cat home-range size varies predictably with landscape productivity and population density	JOURNAL OF ZOOLOGY		112	10.1111/jzo.12290	2016	0952-8369
Schirmel, Jens; Bundschuh, Mirco; Entling, Martin H.; Kowarik, Ingo; Buchholz, Sascha	Impacts of invasive plants on resident animals across ecosystems, taxa, and feeding types: a global assessment	GLOBAL CHANGE BIOLOGY		594	10.1111/gcb.13093	2016	1354-1013
Unger, Gregor M.; Heuertz, Myriam; Vendramin, Giovanni G.; Robledo-Arnuncio, Juan J.	Assessing early fitness consequences of exotic gene flow in the wild: a field study with Iberian pine relicts	EVOLUTIONARY APPLICATIONS		367	10.1111/eva.12333	2016	1752-4571
Corey, B.; Doody, J. S.	Black box and attics: Habitat selection and resource use by large threatened pythons in landscapes with contrasting human modification	AUSTRAL ECOLOGY		6	10.1111/aec.12277	2016	1442-9985
Cole, Ian Arthur; Prober, Suzanne; Lunt, Ian; Koen, Terry B.	Nutrient versus seed bank depletion approaches to controlling exotic annuals in threatened Box Gum woodlands	AUSTRAL ECOLOGY		40	10.1111/aec.12293	2016	1442-9985
Cuassolo, Florencia; Bastidas Navarro, Marcela; Balseiro, Esteban; Modenutti, Beatriz	Effect of light on particulate and dissolved organic matter production of native and exotic macrophyte species in Patagonia	HYDROBIOLOGIA		29	10.1007/s10750-015-2434-7	2016	0018-8158
Otfinowski, Rafael; Kenkel, Norm C.; Tenuta, Mario	Reduced vigor of a clonal invader: Lack of evidence for soilborne pathogens	APPLIED SOIL ECOLOGY		75	10.1016/j.apsoil.2015.09.010	2016	0929-1393
Xu, Meng; Mu, Xidong; Dick, Jaimie T. A.; Fang, Miao; Gu, Dangen; Luo, Du; Zhang, Jiaen; Luo, Jianren; Hu, Yinchang	Comparative Functional Responses Predict the Invasiveness and Ecological Impacts of Alien Herbivorous Snails	PLOS ONE			10.1371/journal.pone.0147017	2016	1932-6203
Buzhdygan, Oksana Y.; Rudenko, Svitlana S.; Kazanci, Caner; Patten, Bernard C.	Effect of invasive black locust (Robinia pseudoacacia L.) on nitrogen cycle in floodplain ecosystem	ECOLOGICAL MODELLING		170	10.1016/j.ecolmodel.2015.07.025	2016	0304-3800
Goncalves, V.; Gherardi, F.; Rebelo, R.	Modelling the predation effects of invasive crayfish, Procambarus clarkii (Girard, 1852), on invasive zebra mussel, Dreissena polymorpha (Pallas, 1771), under laboratory conditions	ITALIAN JOURNAL OF ZOOLOGY		59	10.1080/11250003.2016.1138558	2016	1125-0003
Ferreira, Leandro V; Parolin, Pia; Matos, Darley C L; Cunha, Denise A; Chaves, Priscilla P; Neckel, Selvino O	The effect of exotic grass Urochloa decumbens (Stapf) R.D.Webster (Poaceae) in the reduction of species richness and change of floristic composition of natural regeneration in the Floresta Nacional de Carajas, Brazil.	Anais da Academia Brasileira de Ciencias		589	10.1590/0001-3765201620150121	2016
Smith, Helen M; Dickman, Chris R; Banks, Peter B	Nest Predation by Commensal Rodents in Urban Bushland Remnants.	PloS one		e0156180	10.1371/journal.pone.0156180	2016
Sridhar, Sushmita; Steele-Mortimer, Olivia	Inherent Variability of Growth Media Impacts the Ability of Salmonella Typhimurium to Interact with Host Cells.	PloS one		e0157043	10.1371/journal.pone.0157043	2016
Guisande-Collazo, Alejandra; Gonzalez, Luis; Souza-Alonso, Pablo	Impact of an invasive nitrogen-fixing tree on arbuscular mycorrhizal fungi and the development of native species	AOB PLANTS			10.1093/aobpla/plw018	2016	2041-2851
Haramura, Takashi; Takeuchi, Hirohiko; Crossland, Michael R; Shine, Richard	Biotic Resistance to an Alien Amphibian: Larval Competition between Japanese Frogs and Invasive Cane Toads.	PloS one		e0156396	10.1371/journal.pone.0156396	2016
Luizza, Matthew W.; Wakie, Tewodros; Evangelista, Paul H.; Jarnevich, Catherine S.	Integrating local pastoral knowledge, participatory mapping, and species distribution modeling for risk assessment of invasive rubber vine (Cryptostegia grandiflora) in Ethiopia's Afar region	ECOLOGY AND SOCIETY			10.5751/ES-07988-210122	2016	1708-3087
Livingston, Amy C.; Varner, J. Morgan	FUEL MOISTURE DIFFERENCES IN A MIXED NATIVE AND NON-NATIVE GRASSLAND: IMPLICATIONS FOR FIRE REGIMES	FIRE ECOLOGY		73	10.4996/fireecology.1201073	2016	1933-9747
	Exotic Brome-Grasses in Arid and Semiarid Ecosystems of the Western US: Causes, Consequences, and Management Implications	Exotic Brome-Grasses in Arid and Semiarid Ecosystems of the Western US: Causes, Consequences, and Management Implications				2016	0172-6161(print)
Germino, Matthew J.; Chambers, Jeanne C.; Brown, Cynthia S.	Introduction: Exotic Annual Bromus in the Western USA	Exotic Brome-Grasses in Arid and Semiarid Ecosystems of the Western US: Causes, Consequences, and Management Implications		1	10.1007/978-3-319-24930-8_1	2016	0172-6161(print)
Brooks, Matthew L.; Brown, Cynthia S.; Chambers, Jeanne C.; D'Antonio, Carla M.; Keeley, Jon E.; Belnap, Jayne	Exotic Annual Bromus Invasions: Comparisons Among Species and Ecoregions in the Western United States	Exotic Brome-Grasses in Arid and Semiarid Ecosystems of the Western US: Causes, Consequences, and Management Implications		11	10.1007/978-3-319-24930-8_2	2016	0172-6161(print)
Germino, Matthew J.; Belnap, Jayne; Stark, John M.; Allen, Edith B.; Rau, Benjamin M.	Ecosystem Impacts of Exotic Annual Invaders in the Genus Bromus	Exotic Brome-Grasses in Arid and Semiarid Ecosystems of the Western US: Causes, Consequences, and Management Implications		61	10.1007/978-3-319-24930-8_3	2016	0172-6161(print)
Monaco, Thomas A.; Hardegree, Stuart P.; Pellant, Mike; Brown, Cynthia S.	Assessing Restoration and Management Needs for Ecosystems Invaded by Exotic Annual Bromus Species	Exotic Brome-Grasses in Arid and Semiarid Ecosystems of the Western US: Causes, Consequences, and Management Implications		339	10.1007/978-3-319-24930-8_12	2016	0172-6161(print)
Provencher, Louis; Frid, Leonardo; Czembor, Christina; Morisette, Jeffrey T.	State-and-Transition Models: Conceptual Versus Simulation Perspectives, Usefulness and Breadth of Use, and Land Management Applications	Exotic Brome-Grasses in Arid and Semiarid Ecosystems of the Western US: Causes, Consequences, and Management Implications		371	10.1007/978-3-319-24930-8_13	2016	0172-6161(print)
Szymura, Magdalena; Szymura, Tomasz H.; Wolski, Karol	Invasive Solidago species: how large area do they occupy and what would be the cost of their removal?	POLISH JOURNAL OF ECOLOGY		25	10.3161/15052249PJE2016.64.1.003	2016	1505-2249
Guisande-Collazo, Alejandra; Gonzalez, Luis; Souza-Alonso, Pablo	Impact of an invasive nitrogen-fixing tree on arbuscular mycorrhizal fungi and the development of native species.	AoB PLANTS			10.1093/aobpla/plw018	2016
Horvat, Gabrijel; Franjic, Jozo	INVASIVE PLANTS OF KALNIK FORESTS	SUMARSKI LIST		53		2016	0373-1332
Mohanty, Nitya Prakash; Harikrishnan, S.; Sivakumar, K.; Vasudevan, Karthikeyan	Impact of invasive spotted deer (Axis axis) on tropical island lizard communities in the Andaman archipelago	BIOLOGICAL INVASIONS		9	10.1007/s10530-015-1006-0	2016	1387-3547
Brown, Gregory P.; Kelehear, Crystal; Pizzatto, Ligia; Shine, Richard	The impact of lungworm parasites on rates of dispersal of their anuran host, the invasive cane toad	BIOLOGICAL INVASIONS		103	10.1007/s10530-015-0993-1	2016	1387-3547
Carnegie, Angus J.; Kathuria, Amrit; Pegg, Geoff S.; Entwistle, Peter; Nagel, Matthew; Giblin, Fiona R.	Impact of the invasive rust Puccinia psidii (myrtle rust) on native Myrtaceae in natural ecosystems in Australia	BIOLOGICAL INVASIONS		127	10.1007/s10530-015-0996-y	2016	1387-3547
Wallace, John M.; Prather, Timothy S.	Invasive spread dynamics of Anthriscus caucalis at an ecosystem scale: propagule pressure, grazing disturbance and plant community susceptibility in canyon grasslands	BIOLOGICAL INVASIONS		145	10.1007/s10530-015-0997-x	2016	1387-3547
Marchini, Gina L.; Sherlock, Nena Cole; Ramakrishnan, Alisa P.; Rosenthal, David M.; Cruzan, Mitchell B.	Rapid purging of genetic load in a metapopulation and consequences for range expansion in an invasive plant	BIOLOGICAL INVASIONS		183	10.1007/s10530-015-1001-5	2016	1387-3547
Day, Nicola J.; Dunfield, Kari E.; Antunes, Pedro M.	Fungi from a non-native invasive plant increase its growth but have different growth effects on native plants	BIOLOGICAL INVASIONS		231	10.1007/s10530-015-1004-2	2016	1387-3547
song,, won-kyong; 김은영; 윤은주; 정혜진	Definition of Invasive Disturbance Species and its Influence Factor: Review	Journal of the Korea Society of Environmental Restoration Technology		155	10.13087/kosert.2016.19.1.155	2016	1229-3032
O'Hara, Kevin L.	What is close-to-nature silviculture in a changing world?	FORESTRY		1	10.1093/forestry/cpv043	2016	0015-752X
Kolb, Rosana Marta; Lima Pilon, Natashi Aparecida; Durigan, Giselda	Factors influencing seed germination in Cerrado grasses	ACTA BOTANICA BRASILICA		87	10.1590/0102-33062015abb0199	2016	0102-3306
Li, Shou-Li; Vasemagi, Anti; Ramula, Satu	Genetic variation facilitates seedling establishment but not population growth rate of a perennial invader	ANNALS OF BOTANY		187	10.1093/aob/mcv145	2016	0305-7364
Pearson, Dean E.; Ortega, Yvette K.; Eren, Ozkan; Hierro, Jose L.	Quantifying apparent impact and distinguishing impact from invasiveness in multispecies plant invasions	ECOLOGICAL APPLICATIONS		162	10.1890/14-2345	2016	1051-0761
Gruntman, Michal; Zieger, Sinja; Tielboerger, Katja	Invasive success and the evolution of enhanced weaponry	OIKOS		59	10.1111/oik.02109	2016	0030-1299
Qi Xiangzhen; Lin Zhenshan; Liu Huiyu	Modeling the interactive effects of competition and landscape patterns on exotic species spread	ECOLOGICAL INFORMATICS		30	10.1016/j.ecoinf.2015.11.008	2016	1574-9541
da Rocha, Laura Leandro; Pimenta Filho, Edgard Cavalcanti; Gomes Filho, Manoel Adriao; Delgado, Juan Vicente; Martinez, Amparo Martinez; Ribeiro, Maria Norma	Impact of foreign goat breeds on the genetic structure of Brazilian indigenous goats and consequences to intra-breed genetic diversity	SMALL RUMINANT RESEARCH		28	10.1016/j.smallrumres.2015.12.002	2016	0921-4488
Slesak, Robert A.; Harrington, Timothy B.; D'Amato, Anthony W.	Invasive scotch broom alters soil chemical properties in Douglas-fir forests of the Pacific Northwest, USA	PLANT AND SOIL		281	10.1007/s11104-015-2662-7	2016	0032-079X
Springer, Keith	Methodology and challenges of a complex multi-species eradication in the sub-Antarctic and immediate effects of invasive species removal	NEW ZEALAND JOURNAL OF ECOLOGY		273		2016	0110-6465
Emam, Taraneh	Local soil, but not commercial AMF inoculum, increases native and non-native grass growth at a mine restoration site	RESTORATION ECOLOGY		35	10.1111/rec.12287	2016	1061-2971
Tomback, Diana F.; Resler, Lynn M.; Keane, Robert E.; Pansing, Elizabeth R.; Andrade, Andrew J.; Wagner, Aaron C.	Community Structure, Biodiversity, and Ecosystem Services in Treeline Whitebark Pine Communities: Potential Impacts from a Non-Native Pathogen	FORESTS			10.3390/f7010021	2016	1999-4907
Phillips, Rebecca L.; Ficken, Cari; Eken, Mikki; Hendrickson, John; Beeri, Ofer	Wetland Soil Carbon in a Watershed Context for the Prairie Pothole Region	JOURNAL OF ENVIRONMENTAL QUALITY		368	10.2134/jeq2015.06.0310	2016	0047-2425
Pekin, Burak K.; Wisdom, Michael J.; Parks, Catherine G.; Endress, Bryan A.; Naylor, Bridgett J.	Response of native versus exotic plant guilds to cattle and elk herbivory in forested rangeland	APPLIED VEGETATION SCIENCE		31	10.1111/avsc.12194	2016	1402-2001
Buckley, Yvonne M.; Catford, Jane	Does the biogeographic origin of species matter? Ecological effects of native and non-native species and the use of origin to guide management	JOURNAL OF ECOLOGY		4	10.1111/1365-2745.12501	2016	0022-0477
Pergl, Jan; Sadlo, Jiri; Petrusek, Adam; Lastuvka, Zdenek; Musil, Jiri; Perglova, Irena; Sanda, Radek; Sefrova, Hana; Sima, Jan; Vohralik, Vladimir; Pysek, Petr	Black, Grey and Watch Lists of alien species in the Czech Republic based on environmental impacts and management strategy	NEOBIOTA		1	10.3897/neobiota.28.4824	2016	1619-0033
Wakie, Tewodros T.; Laituri, Melinda; Evangelista, Paul H.	Assessing the distribution and impacts of Prosopis juliflora through participatory approaches	APPLIED GEOGRAPHY		132		2016	0143-6228
Gioria, Margherita; Pysek, Petr	The Legacy of Plant Invasions: Changes in the Soil Seed Bank of Invaded Plant Communities	BIOSCIENCE		40	10.1093/biosci/biv165	2016	0006-3568
Moon, Katie; Adams, Vanessa M.	Using quantitative influence diagrams to map natural resource managers' mental models of invasive species management	LAND USE POLICY		341		2016	0264-8377
Qin, Z.; Zhang, J. E.; DiTommaso, A.; Wang, R. L.; Liang, K. M.	Predicting the potential distribution of Lantana camara L. under RCP scenarios using ISI-MIP models	CLIMATIC CHANGE		193	10.1007/s10584-015-1500-5	2016	0165-0009
Alexander, Heather D.; Moczygemba, Jonathan; Dick, Krysten	Growth and survival of thornscrub forest seedlings in response to restoration strategies aimed at alleviating abiotic and biotic stressors	JOURNAL OF ARID ENVIRONMENTS		180	10.1016/j.jaridenv.2015.06.014	2016	0140-1963
Niphadkar, Madhura; Ficetola, Gentile Francesco; Bonardi, Anna; Nagendra, Harini; Padoa-Schioppa, Emilio	Effects of landscape context on the invasive species Lantana camara in Biligiri Rangaswamy Temple Tiger Reserve, India	TROPICAL ECOLOGY		9		2016	0564-3295
Minor, Rebecca L.; Koprowski, John L.	Seed Removal Increased by Scramble Competition with an Invasive Species	PLOS ONE			10.1371/journal.pone.0143927	2015	1932-6203
Ackermann, D.	Nuclear spectroscopy in nuclei with Z >= 110	NUCLEAR PHYSICS A		376	10.1016/j.nuclphysa.2015.09.002	2015	0375-9474
McGeoch, Melodie A.; Lythe, Morgan J.; Henriksen, Marie V.; McGrannachan, Chris M.	Environmental impact classification for alien insects: a review of mechanisms and their biodiversity outcomes	CURRENT OPINION IN INSECT SCIENCE		46	10.1016/j.cois.2015.09.004	2015	2214-5745
Borroto-Paez, Rafael; Alonso Bosch, Roberto; Fabres, Boris A.; Alvarez Garcia, Osmany	INTRODUCED AMPHIBIANS AND REPTILES IN THE CUBAN ARCHIPELAGO	HERPETOLOGICAL CONSERVATION AND BIOLOGY		985		2015	2151-0733
Rondoni, Gabriele; Athey, Kacie J.; Harwood, James D.; Conti, Eric; Ricci, Carlo; Obrycki, John J.	Development and application of molecular gut-content analysis to detect aphid and coccinellid predation by Harmonia axyridis (Coleoptera: Coccinellidae) in Italy	INSECT SCIENCE		719	10.1111/1744-7917.12165	2015	1672-9609
Xu, Xia; Polley, H. Wayne; Hofmockel, Kirsten; Daneshgar, Pedram P.; Wilsey, Brian J.	Plant invasions differentially affected by diversity and dominant species in native- and exotic-dominated grasslands	ECOLOGY AND EVOLUTION		5662	10.1002/ece3.1830	2015	2045-7758
Tekiela, Daniel R.; Barney, Jacob N.	System-level changes following invasion caused by disruption of functional relationships among plant and soil properties	ECOSPHERE			10.1890/ES15-00412.1	2015	2150-8925
Ishida, K.; Murata, K.; Nishiumi, I.; Takahashi, Y.; Takashi, M.	Endemic Amami Jay, invasive Small Indian Mongoose, and other alien organisms: a new century investigation of island aliens towards improved ecosystem management	JOURNAL OF ORNITHOLOGY		S209	10.1007/s10336-015-1250-1	2015	0021-8375
Cruz Diaz-Barradas, Mari; Zunzunegui, Maria; Alvarez-Cansino, Leonor; Paz Esquivias, Mari; Collantes, Marta B.; Cipriotti, Pablo A.	Species-specific effects of the invasive Hieracium pilosella in Magellanic steppe grasslands are driven by nitrogen cycle changes	PLANT AND SOIL		175	10.1007/s11104-015-2608-0	2015	0032-079X
Arcilla, Nicola; Choi, Chang-Yong; Ozaki, Kiyoaki; Lepczyk, Christopher A.	Invasive species and Pacific island bird conservation: a selective review of recent research featuring case studies of Swinhoe's storm petrel and the Okinawa and Guam rail	JOURNAL OF ORNITHOLOGY		S199	10.1007/s10336-015-1256-8	2015	0021-8375
Aneece, Itiya; Epstein, Howard	Distinguishing Early Successional Plant Communities Using Ground-Level Hyperspectral Data	REMOTE SENSING		16588	10.3390/rs71215850	2015	2072-4292
Crumsey, Jasmine M.; Capowiez, Yvan; Goodsitt, Mitch M.; Larson, Sandra; Le Moine, James M.; Bird, Jeffrey A.; Kling, George W.; Nadelhoffer, Knute J.	Exotic earthworm community composition interacts with soil texture to affect redistribution and retention of litter-derived C and N in northern temperate forest soils	BIOGEOCHEMISTRY		379	10.1007/s10533-015-0164-6	2015	0168-2563
Ramirez-Valiente, J. A.; Robledo-Arnuncio, J. J.	Exotic gene flow affects fitness trait values but not levels of heritable trait variation in the southernmost population of Scots pine (Pinus sylvestris L. var. nevadensis)	BIOLOGICAL CONSERVATION		331	10.1016/j.biocon.2015.10.011	2015	0006-3207
Dong, Li-Jia; Sun, Zhen-Kai; Gao, Yan; He, Wei-Ming	Two-year interactions between invasive Solidago canadensis and soil decrease its subsequent growth and competitive ability	JOURNAL OF PLANT ECOLOGY		617	10.1093/jpe/rtv003	2015	1752-9921
Gonzalez-Bernal, Edna; Brown, Gregory P.; Crowther, Mathew S.; Shine, Richard	Sex and age differences in habitat use by invasive cane toads (Rhinella marina) and a native anuran (Cyclorana australis) in the Australian wet-dry tropics	AUSTRAL ECOLOGY		953	10.1111/aec.12279	2015	1442-9985
Wilson, Robyn Fay; Sarim, Dillon; Rahman, Sadequr	Factors influencing the distribution of the invasive house crow (Corvus splendens) in rural and urban landscapes	URBAN ECOSYSTEMS		1389	10.1007/s11252-015-0448-6	2015	1083-8155
Sayad, Ehsan; Hosseini, Vahid; Gholami, Shaieste; Salehe-Shooshtari, Mohammad Hasan	Different predictors determining litter decomposition rate in functional groups of the tree plantations in a common garden	TREES-STRUCTURE AND FUNCTION		1883	10.1007/s00468-015-1269-1	2015	0931-1890
Bonilla, N. Omar; Pringle, Elizabeth G.	Contagious seed dispersal and the spread of avian-dispersed exotic plants	BIOLOGICAL INVASIONS		3409	10.1007/s10530-015-0966-4	2015	1387-3547
Pehle, Alexandra; Schirmel, Jens	Moss invasion in a dune ecosystem influences ground-dwelling arthropod community structure and reduces soil biological activity	BIOLOGICAL INVASIONS		3467	10.1007/s10530-015-0971-7	2015	1387-3547
Ferreras, A. E.; Giorgis, M. A.; Tecco, P. A.; Cabido, M. R.; Funes, G.	Impact of Ligustrum lucidum on the soil seed bank in invaded subtropical seasonally dry woodlands (Cordoba, Argentina)	BIOLOGICAL INVASIONS		3547	10.1007/s10530-015-0977-1	2015	1387-3547
Shartell, Lindsey M.; Corace, R. Gregory, III; Storer, Andrew J.; Kashian, Daniel M.	Broad and local-scale patterns of exotic earthworm functional groups in forests of National Wildlife Refuges of the Upper Midwest, USA	BIOLOGICAL INVASIONS		3591	10.1007/s10530-015-0982-4	2015	1387-3547
Klinga, Peter; Mikolas, Martin; Zhelev, Petar; Hoglund, Jacob; Paule, Ladislav	Genetic differentiation of western capercaillie in the Carpathian Mountains: the importance of post glacial expansions and habitat connectivity	BIOLOGICAL JOURNAL OF THE LINNEAN SOCIETY		873	10.1111/bij.12643	2015	0024-4066
van de Crommenacker, J.; Bourgeois, Y. X. C.; Warren, B. H.; Jackson, H.; Fleischer-Dogley, F.; Groombridge, J.; Bunbury, N.	Using molecular tools to guide management of invasive alien species: assessing the genetic impact of a recently introduced island bird population	DIVERSITY AND DISTRIBUTIONS		1414	10.1111/ddi.12364	2015	1366-9516
Sarma, Roshmi Rekha; Munsi, Madhushree; Ananthram, Aravind Neelavara	Effect of Climate Change on Invasion Risk of Giant African Snail (Achatina fulica Ferussac, 1821: Achatinidae) in India	PLOS ONE			10.1371/journal.pone.0143724	2015	1932-6203
Yavitt, Joseph B.	Land use history determines non-native earthworm impacts on atmospheric methane consumption in forest soils, central New York State	CANADIAN JOURNAL OF SOIL SCIENCE		321	10.4141/CJSS-2014-073	2015	0008-4271
DeVoe, J. D.; Garrott, R. A.; Rotella, J. J.; Challender, S. R.; White, P. J.; O'Reilly, M.; Butler, C. J.	Summer range occupancy modeling of non-native mountain goats in the greater Yellowstone area	ECOSPHERE			10.1890/ES15-00273.1	2015	2150-8925
Garcia-Aguilar, Maria C.; Luevano-Esparza, Jaime; de la Cueva, Horacio	Mammal decline in the Middle America	JOURNAL FOR NATURE CONSERVATION		127	10.1016/j.jnc.2015.10.001	2015	1617-1381
Abom, Rickard; Vogler, Wayne; Schwarzkopf, Lin	Mechanisms of the impact of a weed (grader grass, Themeda quadrivalvis) on reptile assemblage structure in a tropical savannah	BIOLOGICAL CONSERVATION		75	10.1016/j.biocon.2015.06.016	2015	0006-3207
Laube, Julia; Sparks, Tim H.; Baessler, Claus; Menzel, Annette	Small differences in seasonal and thermal niches influence elevational limits of native and invasive Balsams	BIOLOGICAL CONSERVATION		682	10.1016/j.biocon.2015.08.019	2015	0006-3207
Narayan, Edward J.; Jessop, Tim S.; Hero, Jean-Marc	Invasive cane toad triggers chronic physiological stress and decreased reproductive success in an island endemic	FUNCTIONAL ECOLOGY		1435	10.1111/1365-2435.12446	2015	0269-8463
Giovanetti, Manuela; Lippi, Marta Mariotti; Foggi, Bruno; Giuliani, Claudia	Exploitation of the invasive Acacia pycnantha pollen and nectar resources by the native bee Apis mellifera	ECOLOGICAL RESEARCH		1065	10.1007/s11284-015-1308-9	2015	0912-3814
Podadera, Diego S.; Engel, Vera L.; Parrotta, John A.; Machado, Deivid L.; Sato, Luciane M.; Durigan, Giselda	Influence of Removal of a Non-native Tree Species Mimosa caesalpiniifolia Benth. on the Regenerating Plant Communities in a Tropical Semideciduous Forest Under Restoration in Brazil	ENVIRONMENTAL MANAGEMENT		1148	10.1007/s00267-015-0560-7	2015	0364-152X
Lacasella, Federica; Zapparoli, Marzio	Effects of grasslands and conifer reforestations on centipedes (Chilopoda): barriers, semi-permeable matrices or secondary habitats?	INSECT CONSERVATION AND DIVERSITY		525	10.1111/icad.12133	2015	1752-458X
Bunn, Rebecca A.; Ramsey, Philip W.; Lekberg, Ylva	Do native and invasive plants differ in their interactions with arbuscular mycorrhizal fungi? A meta-analysis	JOURNAL OF ECOLOGY		1547	10.1111/1365-2745.12456	2015	0022-0477
Prevey, Janet S.; Seastedt, Timothy R.	Effects of precipitation change and neighboring plants on population dynamics of Bromus tectorum	OECOLOGIA		765	10.1007/s00442-015-3398-z	2015	0029-8549
Chiuffo, Mariana C.; Macdougall, Andrew S.; Hierro, Jose L.	Native and non-native ruderals experience similar plant-soil feedbacks and neighbor effects in a system where they coexist	OECOLOGIA		843	10.1007/s00442-015-3399-y	2015	0029-8549
Huang, Jinhua; Zhang, Weixin; Liu, Mengyun; Briones, Maria J. I.; Eisenhauer, Nico; Shao, Yuanhu; Cai, Xi'an; Fu, Shenglei; Xia, Hanping	Different impacts of native and exotic earthworms on rhizodeposit carbon sequestration in a subtropical soil	SOIL BIOLOGY & BIOCHEMISTRY		152	10.1016/j.soilbio.2015.08.011	2015	0038-0717
Shannon-Firestone, Sarah; Reynolds, Heather L.; Phillips, Richard P.; Flory, S. Luke; Yannarell, Anthony	The role of ammonium oxidizing communities in mediating effects of an invasive plant on soil nitrification	SOIL BIOLOGY & BIOCHEMISTRY		266	10.1016/j.soilbio.2015.07.017	2015	0038-0717
Oliveira, Leandro B.; Soares, Emerson M.; Jochims, Felipe; Tiecher, Tales; Marques, Anderson R.; Kuinchtner, Bruno C.; Rheinheimer, Danilo S.; de Quadros, Fernando L. F.	Long-Term Effects of Phosphorus on Dynamics of an Overseeded Natural Grassland in Brazil	RANGELAND ECOLOGY & MANAGEMENT		445	10.1016/j.rama.2015.07.012	2015	1550-7424
Perry, George L. W.; Wilmshurst, Janet M.; Ogden, John; Enright, Neal J.	Exotic Mammals and Invasive Plants Alter Fire-Related Thresholds in Southern Temperate Forested Landscapes	ECOSYSTEMS		1290	10.1007/s10021-015-9898-1	2015	1432-9840
Qiu, Jiangxiao	A global synthesis of the effects of biological invasions on greenhouse gas emissions	GLOBAL ECOLOGY AND BIOGEOGRAPHY		1351	10.1111/geb.12360	2015	1466-822X
Messinger, Jana; Gueney, Aylin; Zimmermann, Reiner; Ganser, Barbara; Bachmann, Martin; Remmele, Sabine; Aas, Gregor	Cedrus libani: A promising tree species for Central European forestry facing climate change?	EUROPEAN JOURNAL OF FOREST RESEARCH		1005	10.1007/s10342-015-0905-z	2015	1612-4669
Alsos, Inger Greve; Ware, Chris; Elven, Reidar	Past Arctic aliens have passed away, current ones may stay	BIOLOGICAL INVASIONS		3113	10.1007/s10530-015-0937-9	2015	1387-3547
Fenesi, Annamaria; Gered, Julianna; Meiners, Scott J.; Tothmeresz, Bela; Toeroek, Peter; Ruprecht, Eszter	Does disturbance enhance the competitive effect of the invasive Solidago canadensis on the performance of two native grasses?	BIOLOGICAL INVASIONS		3303	10.1007/s10530-015-0954-8	2015	1387-3547
Pal, Robert W.; Chen, Shuyan; Nagy, David U.; Callaway, Ragan M.	Impacts of Solidago gigantea on other species at home and away	BIOLOGICAL INVASIONS		3317	10.1007/s10530-015-0955-7	2015	1387-3547
Paul, Sarah C.; Pell, Judith K.; Blount, Jonathan D.	Reproduction in Risky Environments: The Role of Invasive Egg Predators in Ladybird Laying Strategies	PLOS ONE			10.1371/journal.pone.0139404	2015	1932-6203
Couto, Ricardo Sousa; Lopes, Rosana Conrado; Alvarenga Braga, Joao Marcelo	Dioscorea flabellispina (Dioscoreaceae), a new endangered species from the Brazilian Atlantic Rainforest	PHYTOTAXA		89		2015	1179-3155
Newediuk, Levi J.; Waters, Isobel; Hare, James F.	Aspen Parkland Pasture Altered by Richardson's Ground Squirrel (Urocitellus richardsonii Sabine) Activity: The Good, the Bad, and the Not So Ugly?	Canadian Field-Naturalist		331		2015	0008-3550
Kolbe, Sarah E.; Townsend-Small, Amy; Miller, Arnold I.; Culley, Theresa M.; Cameron, Guy N.	Effect of Lonicera maackii on Soil Carbon and Nitrogen in Southwestern Ohio Forests	INVASIVE PLANT SCIENCE AND MANAGEMENT		375	10.1614/IPSM-D-15-00010.1	2015	1939-7291
Liu, Jin-Gang; Chen, Bao-Ming; Peng, Shao-Lin	Abscisic acid contributes to the invasion resistance of native forest community	ALLELOPATHY JOURNAL		247		2015	0971-4693
Yang, Beifen; Li, Junmin; Zhang, Jing; Yan, Ming	EFFECTS OF NUTRIENTS ON INTERACTION BETWEEN THE INVASIVE BIDENS PILOSA AND THE PARASITIC CUSCUTA AUSTRALIS	PAKISTAN JOURNAL OF BOTANY		1693		2015	0556-3321
Hrivnak, Richard; Slezak, Michal; Jarcuska, Benjamin; Jarolimek, Ivan; Kochjarova, Judita	Native and Alien Plant Species Richness Response to Soil Nitrogen and Phosphorus in Temperate Floodplain and Swamp Forests	Forests		3501	10.3390/f6103501	2015	1999-4907
Soltis, Nicole E.; Gomez, Sara; Gonda-King, Liahna; Preisser, Evan L.; Orians, Colin M.	Contrasting effects of two exotic invasive hemipterans on whole-plant resource allocation in a declining conifer	ENTOMOLOGIA EXPERIMENTALIS ET APPLICATA		86	10.1111/eea.12343	2015	0013-8703
Nielsen, Abraham M.; Rieske, Lynne K.	Potential host and range expansion of an exotic insect-pathogen complex: Simulating effects of sassafras mortality from laurel wilt disease invasion in the central hardwoods region	JOURNAL OF THE TORREY BOTANICAL SOCIETY		292	10.3159/TORREY-D-14-00005.1	2015	1095-5674
Bao, Gensheng; Saikkonen, Kari; Wang, Hongsheng; Zhou, Lianyu; Chen, Shuihong; Li, Chunjie; Nan, Zhibiao	Does endophyte symbiosis resist allelopathic effects of an invasive plant in degraded grassland?	FUNGAL ECOLOGY		114	10.1016/j.funeco.2015.05.006	2015	1754-5048
Reynolds, John Warren; Hasson, Alyson J.; McAlpine, Donald F.	EARTHWORMS (OLIGOCHAETA: LUMBRICIDAE) OF THE NEPISIGUIT PROTECTED NATURAL AREA AND REGION, NEW BRUNSWICK, WITH ADDITIONS TO THE PROVINCE	Megadrilogica		1		2015	0380-9633
Shackleton, Ross T.; Le Maitre, David C.; Richardson, David M.	Stakeholder perceptions and practices regarding Prosopis (mesquite) invasions and management in South Africa	AMBIO		569	10.1007/s13280-014-0597-5	2015	0044-7447
Gosper, Carl R.; Prober, Suzanne M.; Yates, Colin J.; Scott, John K.	Combining asset- and species-led alien plant management priorities in the world's most intact Mediterranean-climate landscape	BIODIVERSITY AND CONSERVATION		2789	10.1007/s10531-015-0973-x	2015	0960-3115
Thabethe, Vuyisile; Wilson, Amy-Leigh; Hart, Lorinda A.; Downs, Colleen T.	Ingestion by an invasive parakeet species reduces germination success of invasive alien plants relative to ingestion by indigenous turaco species in South Africa	BIOLOGICAL INVASIONS		3029	10.1007/s10530-015-0932-1	2015	1387-3547
Spellman, Katie V.; Schneller, Laura C.; Mulder, Christa P. H.; Carlson, Matthew L.	Effects of non-native Melilotus albus on pollination and reproduction in two boreal shrubs	OECOLOGIA		495	10.1007/s00442-015-3364-9	2015	0029-8549
Uselman, Shauna M.; Snyder, Keirith A.; Leger, Elizabeth A.; Duke, Sara E.	Emergence and early survival of early versus late seral species in Great Basin restoration in two different soil types	APPLIED VEGETATION SCIENCE		624	10.1111/avsc.12175	2015	1402-2001
Havill, Scott; Schwinning, Susanne; Lyons, Kelly G.	Fire effects on invasive and native warm-season grass species in a North American grassland at a time of extreme drought	APPLIED VEGETATION SCIENCE		637	10.1111/avsc.12171	2015	1402-2001
Klock, Metha M.; Barrett, Luke G.; Thrall, Peter H.; Harms, Kyle E.	Host promiscuity in symbiont associations can influence exotic legume establishment and colonization of novel ranges	DIVERSITY AND DISTRIBUTIONS		1193	10.1111/ddi.12363	2015	1366-9516
Naumann, Ken; Higgins, Rob J.	The European fire ant (Hymenoptera: Formicidae) as an invasive species: impact on local ant species and other epigaeic arthropods	CANADIAN ENTOMOLOGIST		592	10.4039/tce.2014.69	2015	0008-347X
Bao, Francielli; Assis, Marco Antonio; Arruda, Rafael; Pott, Arnildo	Effects of Urochloa humidicola on Plant Diversity in Native Grasslands in a Neotropical Wetland	WETLANDS		841	10.1007/s13157-015-0673-z	2015	0277-5212
Latham, A. David M.; Latham, M. Cecilia; Cieraad, Ellen; Tompkins, Daniel M.; Warburton, Bruce	Climate change turns up the heat on vertebrate pest control	BIOLOGICAL INVASIONS		2821	10.1007/s10530-015-0931-2	2015	1387-3547
Buddenhagen, Christopher E.; Tye, Alan	Lessons from successful plant eradications in Galapagos: commitment is crucial	BIOLOGICAL INVASIONS		2893	10.1007/s10530-015-0919-y	2015	1387-3547
Prevey, Janet S.; Seastedt, Timothy R.	Increased winter precipitation benefits the native plant pathogen Ustilago bullata that infects an invasive grass	BIOLOGICAL INVASIONS		3041	10.1007/s10530-015-0934-z	2015	1387-3547
Fernandes, Izaias; Penha, Jerry; Zuanon, Jansen	Size-dependent response of tropical wetland fish communities to changes in vegetation cover and habitat connectivity	LANDSCAPE ECOLOGY		1421	10.1007/s10980-015-0196-2	2015	0921-2973
Doherty, Tim S.; Dickman, Chris R.; Nimmo, Dale G.; Ritchie, Euan G.	Multiple threats, or multiplying the threats? Interactions between invasive predators and other ecological disturbances	BIOLOGICAL CONSERVATION		60	10.1016/j.biocon.2015.05.013	2015	0006-3207
Parejo, Sandra Hervias; Benedicto Royuela, Jose; Rodriguez-Luengo, Juan L.; Ramos, Jaime A.; Medina, Felix M.; Geraldes, Pedro; Ruiz de Ybanez, Rock; Nogales, Manuel	The impact and legislative framework of invasive mammals on Portuguese Macaronesian islands: A case study on Corvo, Azores	ENVIRONMENTAL SCIENCE & POLICY		120	10.1016/j.envsci.2015.05.002	2015	1462-9011
Farris, Zach J.; Golden, Christopher D.; Karpanty, Sarah; Murphy, Asia; Stauffer, Dean; Ratelolahy, Felix; Andrianjakarivelo, Vonjy; Holmes, Christopher M.; Kelly, Marcella J.	Hunting, Exotic Carnivores, and Habitat Loss: Anthropogenic Effects on a Native Carnivore Community, Madagascar	PLOS ONE			10.1371/journal.pone.0136456	2015	1932-6203
Kalarus, Konrad; Nowicki, Piotr	How Do Landscape Structure, Management and Habitat Quality Drive the Colonization of Habitat Patches by the Dryad Butterfly (Lepidoptera: Satyrinae) in Fragmented Grassland?	PLOS ONE			10.1371/journal.pone.0138557	2015	1932-6203
Buchholz, Sascha; Tietze, Hedwig; Kowarik, Ingo; Schirmel, Jens	Effects of a Major Tree Invader on Urban Woodland Arthropods	PLOS ONE			10.1371/journal.pone.0137723	2015	1932-6203
Giannini, Tereza C.; Garibaldi, Lucas A.; Acosta, Andre L.; Silva, Juliana S.; Maia, Kate P.; Saraiva, Antonio M.; Guimaraes, Paulo R., Jr.; Kleinert, Astrid M. P.	Native and Non-Native Supergeneralist Bee Species Have Different Effects on Plant-Bee Networks	PLOS ONE			10.1371/journal.pone.0137198	2015	1932-6203
Glushakova, A M; Kachalkin, A V; Chernov, I Yu	[Effect of Invasive Herb Species on the Structure of Soil Yeast Complexes in Mixed Forests Exemplified by Impatiens parviflora DC].	Mikrobiologiia		606		2015	0026-3656
Guo, Qinfeng	No consistent small-scale native-exotic relationships	PLANT ECOLOGY		1225	10.1007/s11258-015-0503-7	2015	1385-0237
Ledger, Kimberly J.; Pal, Robert W.; Murphy, Patrick; Nagy, David U.; Filep, Rita; Callaway, Ragan M.	Impact of an invader on species diversity is stronger in the non-native range than in the native range	PLANT ECOLOGY		1285	10.1007/s11258-015-0508-2	2015	1385-0237
Nickelson, Joshua B.; Holzmueller, Eric J.; Groninger, John W.; Lesmeister, Damon B.	Previous Land Use and Invasive Species Impacts on Long-term Afforestation Success	FORESTS		3123	10.3390/f6093123	2015	1999-4907
Jolly, Christopher J.; Shine, Richard; Greenlees, Matthew J.	The impact of invasive cane toads on native wildlife in southern Australia	ECOLOGY AND EVOLUTION		3879	10.1002/ece3.1657	2015	2045-7758
Goessling, Jeffrey M.; Lutterschmidt, William I.; Reinert, Howard K.; Bushar, Lauretta M.; Odum, R. Andrew	Multiyear Sampling Reveals an Increased Population Density of an Endemic Lizard after the Establishment of an Invasive Snake on Aruba	JOURNAL OF HERPETOLOGY		358	10.1670/13-165	2015	0022-1511
Andreason, Sharon; Gard, Mary; Wayadande, Astri	Detection of the Red-streaked Leafhopper, Balclutha rubrostriata (Melichor) (Hemiptera: Cicadellidae), on an Invasive Grass Species in Oklahoma	SOUTHWESTERN ENTOMOLOGIST		479		2015	0147-1724
Kasak, J.; Mazalova, M.; Sipos, J.; Kuras, T.	Dwarf pine: invasive plant threatens biodiversity of alpine beetles	BIODIVERSITY AND CONSERVATION		2399	10.1007/s10531-015-0929-1	2015	0960-3115
Glushakova, A. M.; Kachalkin, A. V.; Chernov, I. Yu.	Effect of invasive herb species on the structure of soil yeast complexes in mixed forests exemplified by Impatiens parviflora DC	MICROBIOLOGY		717	10.1134/S0026261715050094	2015	0026-2617
Doody, J. Sean; Soanes, Rebekah; Castellano, Christina M.; Rhind, David; Green, Brian; McHenry, Colin R.; Clulow, Simon	Invasive toads shift predator-prey densities in animal communities by removing top predators	ECOLOGY		2544	10.1890/14-1332.1	2015	0012-9658
Cameron, Erin K.; Bayne, Erin M.	Spatial patterns and spread of exotic earthworms at local scales	CANADIAN JOURNAL OF ZOOLOGY		721	10.1139/cjz-2014-0197	2015	0008-4301
Hawn, Heather; Tison, Jennifer	Tourism and Political Choices of Indigenous Populations in Yucatan	LATIN AMERICAN PERSPECTIVES		234		2015	0094-582X
Davalos, Andrea; Simpson, Elizabeth; Nuzzo, Victoria; Blossey, Bernd	Non-consumptive Effects of Native Deer on Introduced Earthworm Abundance	ECOSYSTEMS		1029	10.1007/s10021-015-9881-x	2015	1432-9840
Davis, Mark A.; Anderson, Michael D.; Bock-Brownstein, Lilly; Staudenmaier, Anna; Suliteanu, Melena; Wareham, Amanda; Dosch, Jerald J.	Little evidence of native and non-native species influencing one another's abundance and distribution in the herb layer of an oak woodland	JOURNAL OF VEGETATION SCIENCE		1005	10.1111/jvs.12302	2015	1100-9233
Cameron, Erin K.; Shaw, C. H.; Bayne, Erin M.; Kurz, W. A.; Kull, S. J.	Modelling interacting effects of invasive earthworms and wildfire on forest floor carbon storage in the boreal forest	SOIL BIOLOGY & BIOCHEMISTRY		189	10.1016/j.soilbio.2015.05.020	2015	0038-0717
Adriaens, T.; Baert, K.; Breyne, P.; Casaer, J.; Devisscher, S.; Onkelinx, T.; Pieters, S.; Stuyck, J.	Successful eradication of a suburban Pallas's squirrel Callosciurus erythraeus (Pallas 1779) (Rodentia, Sciuridae) population in Flanders (northern Belgium)	BIOLOGICAL INVASIONS		2517	10.1007/s10530-015-0898-z	2015	1387-3547
Grove, Sara; Parker, Ingrid M.; Haubensak, Karen A.	Persistence of a soil legacy following removal of a nitrogen-fixing invader	BIOLOGICAL INVASIONS		2621	10.1007/s10530-015-0900-9	2015	1387-3547
Davalos, Andrea; Nuzzo, Victoria; Blossey, Bernd	Single and interactive effects of deer and earthworms on non-native plants	FOREST ECOLOGY AND MANAGEMENT		28	10.1016/j.foreco.2015.04.026	2015	0378-1127
Wang Lei; Zhang Fei; Wang Congyan; Xiao Hongguang; Shi Yanchun; Zhao Lulu; Du Daolin	Insights into the Ecotoxicological Effects of Leaf Aqueous Extract of Solidago canadensis on Seed Germination and Growth of Lactuca sativa under Cu and Cd Pollution	Asian Journal of Ecotoxicology		203	10.7524/AJE.1673-5897.20141208001	2015	1673-5897
Krushelnycky, Paul D.	Ecology of some lesser-studied introduced ant species in Hawaiian forests	JOURNAL OF INSECT CONSERVATION		659	10.1007/s10841-015-9789-y	2015	1366-638X
Cheng, Shoujie; Zeng, Ling; Xu, Yijuan	Mutualism Between Fire Ants and Mealybugs Reduces Lady Beetle Predation	JOURNAL OF ECONOMIC ENTOMOLOGY		1560	10.1093/jee/tov117	2015	0022-0493
Cruz, Joana; Sarmento, Pedro; White, Piran C. L.	Influence of exotic forest plantations on occupancy and co-occurrence patterns in a Mediterranean carnivore guild	JOURNAL OF MAMMALOGY		854	10.1093/jmammal/gyv109	2015	0022-2372
Loy, Xingwen; Wainwright, Claire E.; Mayfield, Margaret M.	Asteraceae invaders have limited impacts on the pollination of common native annual species in SW Western Australia's open woodland wildflower communities	PLANT ECOLOGY		1103	10.1007/s11258-015-0495-3	2015	1385-0237
Aguilera, Narciso; Sanhueza, Carolina; Guedes, Lubia M.; Becerra, Jose; Carrasco, Sebastian; Hernandez, Victor	Does Acacia dealbata express shade tolerance in Mediterranean forest ecosystems of South America?	ECOLOGY AND EVOLUTION		3338	10.1002/ece3.1606	2015	2045-7758
Rojas, Isabel M.; Zedler, Joy B.	An invasive exotic grass reduced sedge meadow species richness by half	WETLANDS ECOLOGY AND MANAGEMENT		649	10.1007/s11273-015-9409-3	2015	0923-4861
Harradine, E.; How, R. A.; Schmitt, L. H.; Spencer, P. B. S.	Island size and remoteness have major conservation significance for how spatial diversity is partitioned in skinks	BIODIVERSITY AND CONSERVATION		2011	10.1007/s10531-015-0923-7	2015	0960-3115
Concilio, Amy; Vargas, Thiago; Cheng, Weixin	Rhizosphere-mediated effects of the invasive grass Bromus tectorum L. and native Elymus elymoides on nitrogen cycling in Great Basin Desert soils	PLANT AND SOIL		245	10.1007/s11104-015-2482-9	2015	0032-079X
Vink, Stefanie N.; Jordan, Nicholas R.; Huerd, Sheri C.; Shaeffer, Craig C.; Kinkel, Linda L.; Aldrich-Wolfe, Laura	Soil conditioning effects of native and exotic grassland perennials on the establishment of native and exotic plants	PLANT AND SOIL		335	10.1007/s11104-015-2498-1	2015	0032-079X
Dorado-Rodrigues, Taina Figueras; Guedes Layme, Viviane Maria; Barbosa Silva, Fernando Henrique; da Cunha, Catia Nunes; Struessmann, Christine	Effects of shrub encroachment on the anuran community in periodically flooded grasslands of the largest Neotropical wetland	AUSTRAL ECOLOGY		547	10.1111/aec.12222	2015	1442-9985
Sunny, Anupam; Diwakar, Swati; Sharma, Gyan Prakash	Native insects and invasive plants encounters	ARTHROPOD-PLANT INTERACTIONS		323	10.1007/s11829-015-9384-x	2015	1872-8855
Flory, S. Luke; Clay, Keith; Emery, Sarah M.; Robb, Joseph R.; Winters, Brian	Fire and non-native grass invasion interact to suppress tree regeneration in temperate deciduous forests	JOURNAL OF APPLIED ECOLOGY		992	10.1111/1365-2664.12437	2015	0021-8901
Lennox, Robert; Choi, Kevin; Harrison, Philip M.; Paterson, James E.; Peat, Tyler B.; Ward, Taylor D.; Cooke, Steven J.	Improving science-based invasive species management with physiological knowledge, concepts, and tools	BIOLOGICAL INVASIONS		2213	10.1007/s10530-015-0884-5	2015	1387-3547
Muir, Jennifer L.; Vamosi, Jana C.	Invasive Scotch broom (Cytisus scoparius, Fabaceae) and the pollination success of three Garry oak-associated plant species	BIOLOGICAL INVASIONS		2429	10.1007/s10530-015-0886-3	2015	1387-3547
Doege, Jonas da Silva; de Oliveira, Henrique Valadao; Tidon, Rosana	Rapid response to abiotic and biotic factors controls population growth of two invasive drosophilids (Diptera) in the Brazilian Savanna	BIOLOGICAL INVASIONS		2461	10.1007/s10530-015-0889-0	2015	1387-3547
Nakamura, Akihiro; Burwell, Chris J.; Lambkin, Christine L.; Katabuchi, Masatoshi; McDougall, Andrew; Raven, Robert J.; Neldner, V. John	The role of human disturbance in island biogeography of arthropods and plants: an information theoretic approach	JOURNAL OF BIOGEOGRAPHY		1406	10.1111/jbi.12520	2015	0305-0270
Noumi, Zouhaier	Effects of exotic and endogenous shrubs on understory vegetation and soil nutrients in the south of Tunisia	JOURNAL OF ARID LAND		481	10.1007/s40333-015-0047-7	2015	1674-6767
Fleury, Marina; Marcelo, Wara; Vasquez, Rodrigo A.; Alberto Gonzalez, Luis; Bustamante, Ramiro O.	Recruitment Dynamics of the Relict Palm, Jubaea chilensis: Intricate and Pervasive Effects of Invasive Herbivores and Nurse Shrubs in Central Chile	PLOS ONE			10.1371/journal.pone.0133559	2015	1932-6203
Abulizi, Abudukeyimu; Feng, Zhaodong; Yang, Jianjun; Zayiti, Abudoukeremujiang; Xu, Zhonglin	Invasion of the Himalayan hotspot by Acacia farnesiana: how the human footprint influences the potential distribution of alien species	CURRENT SCIENCE		183		2015	0011-3891
Iacarella, Josephine C.; Mankiewicz, Phoebe S.; Ricciardi, Anthony	Negative competitive effects of invasive plants change with time since invasion	ECOSPHERE			10.1890/ES15-00147.1	2015	2150-8925
Barney, Jacob N.; Tekiela, Daniel R.; Noelia Barrios-Garcia, Maria; Dimarco, Romina D.; Hufbauer, Ruth A.; Leipzig-Scott, Peter; Nunez, Martin A.; Pauchard, Anibal; Pysek, Petr; Vitkova, Michaela; Maxwell, Bruce D.	Global Invader Impact Network (GIIN): toward standardized evaluation of the ecological impacts of invasive plants	ECOLOGY AND EVOLUTION		2878	10.1002/ece3.1551	2015	2045-7758
Loomis, Jessica D.; Matter, Stephen F.; Cameron, Guy N.	Effects of Invasive Amur Honeysuckle (Lonicera maackii) and White-Tailed Deer (Odocoileus virginianus) on Survival of Sugar Maple Seedlings in a Southwestern Ohio Forest	AMERICAN MIDLAND NATURALIST		65		2015	0003-0031
Liao, Huixuan; Luo, Wenbo; Peng, Shaolin; Callaway, Ragan M.	Plant diversity, soil biota and resistance to exotic invasion	DIVERSITY AND DISTRIBUTIONS		826	10.1111/ddi.12319	2015	1366-9516
Ortas, Ibrahim	Comparative analyses of Turkey agricultural soils: Potential communities of indigenous and exotic mycorrhiza species' effect on maize (Zea mays L.) growth and nutrient uptakes	EUROPEAN JOURNAL OF SOIL BIOLOGY		79	10.1016/j.ejsobi.2015.05.006	2015	1164-5563
Davalos, Andrea; Nuzzo, Victoria; Blossey, Bernd	Interactive effects of deer, earthworms and non-native plants on rare forest plant recruitment	BIOLOGICAL CONSERVATION		173	10.1016/j.biocon.2015.04.025	2015	0006-3207
Beck, Jared J.; Hernandez, Daniel L.; Pasari, Jae R.; Zavaleta, Erika S.	Grazing maintains native plant diversity and promotes community stability in an annual grassland	ECOLOGICAL APPLICATIONS		1259	10.1890/14-1093.1	2015	1051-0761
Lin, Tiantian; Klinkhamer, Peter G. L.; Vrieling, Klaas	Parallel evolution in an invasive plant: effect of herbivores on competitive ability and regrowth of Jacobaea vulgaris	ECOLOGY LETTERS		668	10.1111/ele.12445	2015	1461-023X
Reyes Gomez, Victor Manuel; Viramontes Olivas, Oscar; Arredondo Moreno, Jose Tulio; Huber Sannwald, Elisabeth; Rangel Rodriguez, Alfredo	Functional ecohydrological differences among native and exotic grassland covers in sub-urban landscapes of Chihuahua city, Mexico	LANDSCAPE AND URBAN PLANNING		54	10.1016/j.landurbplan.2015.03.005	2015	0169-2046
Hilbig, Bridget E.; Allen, Edith B.	Plant-soil feedbacks and competitive interactions between invasive Bromus diandrus and native forb species	PLANT AND SOIL		191	10.1007/s11104-015-2451-3	2015	0032-079X
Montero-Castano, Ana; Vila, Montserrat	Direct and Indirect Influence of Non-Native Neighbours on Pollination and Fruit Production of a Native Plant	PLOS ONE			10.1371/journal.pone.0128595	2015	1932-6203
Calinger, Kellen; Calhoon, Elisabeth; Chang, Hsiao-chi; Whitacre, James; Wenzel, John; Comita, Liza; Queenborough, Simon	Historic Mining and Agriculture as Indicators of Occurrence and Abundance of Widespread Invasive Plant Species	PLOS ONE			10.1371/journal.pone.0128161	2015	1932-6203
Lindenmayer, David B.; Wood, Jeff; MacGregor, Christopher; Buckley, Yvonne M.; Dexter, Nicholas; Fortescue, Martin; Hobbs, Richard J.; Catford, Jane A.	A Long-Term Experimental Case Study of the Ecological Effectiveness and Cost Effectiveness of Invasive Plant Management in Achieving Conservation Goals: Bitou Bush Control in Booderee National Park in Eastern Australia	PLOS ONE			10.1371/journal.pone.0128482	2015	1932-6203
Matchett, J. R.; Stark, Philip B.; Ostoja, Steven M.; Knapp, Roland A.; McKenny, Heather C.; Brooks, Matthew L.; Langford, William T.; Joppa, Lucas N.; Berlow, Eric L.	Detecting the influence of rare stressors on rare species in Yosemite National Park using a novel stratified permutation test	SCIENTIFIC REPORTS			10.1038/srep10702	2015	2045-2322
Negussie, Aklilu; Nacro, Souleymane; Achten, Wouter M. J.; Norgrove, Lindsey; Kenis, Marc; Hadgu, Kiros Meles; Aynekulu, Ermias; Hermy, Martin; Muys, Bart	Insufficient Evidence of Jatropha curcas L. Invasiveness: Experimental Observations in Burkina Faso, West Africa	BIOENERGY RESEARCH		570	10.1007/s12155-014-9544-3	2015	1939-1234
Kamel, Mohamed; Hammad, Sabah A.	The Allelopathic Effect of the Exotic Tree Acacia saligna on the Germination of Wheat and Canola	Ecologia Balkanica		103		2015	1314-0213
Breen, Daniel B.	The Influence of Agricultural Abandonment and the Abiotic Environment on the Vegetation Communities of a Suburban Deciduous Forest	CASTANEA		103	10.2179/15-055	2015	0008-7475
Moulopoulos, K.	Topological Proximity Effect: A Gauge Influence from Distant Fields on Planar Quantum-Coherent Systems	INTERNATIONAL JOURNAL OF THEORETICAL PHYSICS		1908	10.1007/s10773-014-2395-z	2015	0020-7748
Benediktsson, Karl	FLORAL HAZARDS: NOOTKA LUPIN IN ICELAND AND THE COMPLEX POLITICS OF INVASIVE LIFE	GEOGRAFISKA ANNALER SERIES B-HUMAN GEOGRAPHY		139		2015	0435-3684
Smith, Lauren M.; Schmitz, Oswald J.	Invasive plants may promote predator-mediated feedback that inhibits further invasion	ECOLOGY AND EVOLUTION		2411	10.1002/ece3.1525	2015	2045-7758
McCullough, Deborah G.; Mercader, Rodrigo J.; Siegert, Nathan W.	Developing and integrating tactics to slow ash (Oleaceae) mortality caused by emerald ash borer (Coleoptera: Buprestidae)	CANADIAN ENTOMOLOGIST		349	10.4039/tce.2015.3	2015	0008-347X
Huang, Qiaoqiao; Shen, Yide; Li, Xiaoxia; Zhang, Guoliang; Huang, Dongdong; Fan, Zhiwei	Regeneration capacity of the small clonal fragments of the invasive Mikania micranthaHBK: effects of the stolon thickness, internode length and presence of leaves	WEED BIOLOGY AND MANAGEMENT		70	10.1111/wbm.12066	2015	1444-6162
Kumschick, Sabrina; Bacher, Sven; Evans, Thomas; Markova, Zuzana; Pergl, Jan; Pysek, Petr; Vaes-Petignat, Sibylle; van der Veer, Gabriel; Vila, Montserrat; Nentwig, Wolfgang	Comparing impacts of alien plants and animals in Europe using a standard scoring system	JOURNAL OF APPLIED ECOLOGY		552	10.1111/1365-2664.12427	2015	0021-8901
Rocchini, Duccio; Andreo, Veronica; Foerster, Michael; Garzon-Lopez, Carol Ximena; Gutierrez, Andrew Paul; Gillespie, Thomas W.; Hauffe, Heidi C.; He, Kate S.; Kleinschmit, Birgit; Mairota, Paola; Marcantonio, Matteo; Metz, Markus; Nagendra, Harini; Pareeth, Sajid; Ponti, Luigi; Ricotta, Carlo; Rizzoli, Annapaola; Schaab, Gertrud; Zebisch, Marc; Zorer, Roberto; Neteler, Markus	Potential of remote sensing to predict species invasions: A modelling perspective	PROGRESS IN PHYSICAL GEOGRAPHY		283	10.1177/0309133315574659	2015	0309-1333
Lewicki, Krista E.; Huyvaert, Kathryn P.; Piaggio, Antoinette J.; Diller, Lowell V.; Franklin, Alan B.	Effects of barred owl (Strix varia) range expansion on Haemoproteus parasite assemblage dynamics and transmission in barred and northern spotted owls (Strix occidentalis caurina)	BIOLOGICAL INVASIONS		1713	10.1007/s10530-014-0828-5	2015	1387-3547
Klug, Page E.; Reed, Robert N.; Mazzotti, Frank J.; McEachern, Michelle A.; Vinci, Joy J.; Craven, Katelin K.; Adams, Amy A. Yackel	The influence of disturbed habitat on the spatial ecology of Argentine black and white tegu (Tupinambis merianae), a recent invader in the Everglades ecosystem (Florida, USA)	BIOLOGICAL INVASIONS		1785	10.1007/s10530-014-0834-7	2015	1387-3547
Horn, Kevin J.; Nettles, Rachel; St Clair, Samuel B.	Germination response to temperature and moisture to predict distributions of the invasive grass red brome and wildfire	BIOLOGICAL INVASIONS		1849	10.1007/s10530-015-0841-3	2015	1387-3547
Nogales, M.; Castaneda, I.; Lopez-Darias, M.; Medina, F. M.; Bonnaud, E.	The unnoticed effect of a top predator on complex mutualistic ecological interactions	BIOLOGICAL INVASIONS		1655	10.1007/s10530-014-0823-x	2015	1387-3547
Hager, Heather A.; Rupert, Rochelle; Quinn, Lauren D.; Newman, Jonathan A.	Escaped Miscanthus sacchariflorus reduces the richness and diversity of vegetation and the soil seed bank	BIOLOGICAL INVASIONS		1833	10.1007/s10530-014-0839-2	2015	1387-3547
Fenesi, Annamaria; Vagasi, Csongor I.; Beldean, Monica; Foeldesi, Rita; Kolcsar, Levente-Peter; Shapiro, Julie Teresa; Toeroek, Edina; Kovacs-Hostyanszki, Aniko	Solidago canadensis impacts on native plant and pollinator communities in different-aged old fields	BASIC AND APPLIED ECOLOGY		335	10.1016/j.baae.2015.03.003	2015	1439-1791
Maderek, Ewa; Lukowski, Adrian; Giertych, Marian J.; Karolewski, Piotr	Influence of native and alien Prunus species and light conditions on performance of the leaf beetle Gonioctena quinquepunctata	ENTOMOLOGIA EXPERIMENTALIS ET APPLICATA		193	10.1111/eea.12298	2015	0013-8703
Moreira-Arce, Dario; de la Barrera, Francisco; Bustamante, Ramiro O.	Distance to suburban/wildland border interacts with habitat type for structuring exotic plant communities in a natural area surrounding a metropolitan area in central Chile	PLANT ECOLOGY & DIVERSITY		363	10.1080/17550874.2014.983201	2015	1755-0874
Herget, Mollie E.; Hufford, Kristina M.; Mummey, Daniel L.; Mealor, Brian A.; Shreading, Lauren N.	Effects of competition with Bromus tectorum on early establishment of Poa secunda accessions: can seed source impact restoration success?	RESTORATION ECOLOGY		277	10.1111/rec.12177	2015	1061-2971
Donlan, C. Josh; Luque, Gloria M.; Wilcox, Chris	Maximizing Return on Investment for Island Restoration and Species Conservation	CONSERVATION LETTERS		171	10.1111/conl.12126	2015	1755-263X
Luo Wen-Qi; Fu Shao-Huai; Yang Xiao-Bo; Chen Yu-Kai; Zhou Wei; Yang Qi; Tao Chu; Zhou Wen-Song	Distribution patterns of alien invasive plants and their influences on native plants of Hainan Island	Chinese Journal of Plant Ecology		486		2015	1005-264X
Carter, Evin T.; Eads, Bryan C.; Ravesi, Michael J.; Kingsbury, Bruce A.	Exotic invasive plants alter thermal regimes: implications for management using a case study of a native ectotherm	FUNCTIONAL ECOLOGY		683	10.1111/1365-2435.12374	2015	0269-8463
Ferrero, Victoria; Barrett, Spencer C. H.; Castro, Silvia; Caldeirinha, Patricia; Navarro, Luis; Loureiro, Joao; Rodriguez-Echeverria, Susana	Invasion genetics of the Bermuda buttercup (Oxalis pes-caprae): complex intercontinental patterns of genetic diversity, polyploidy and heterostyly characterize both native and introduced populations	MOLECULAR ECOLOGY		2143	10.1111/mec.13056	2015	0962-1083
Rollins, Lee A.; Richardson, Mark F.; Shine, Richard	A genetic perspective on rapid evolution in cane toads (Rhinella marina)	MOLECULAR ECOLOGY		2264	10.1111/mec.13184	2015	0962-1083
Feit, Benjamin; Letnic, Mike	Species level traits determine positive and negative population impacts of invasive cane toads on native squamates	BIODIVERSITY AND CONSERVATION		1017	10.1007/s10531-014-0850-z	2015	0960-3115
Hughes, Kevin A.; Pertierra, Luis R.; Molina-Montenegro, Marco A.; Convey, Peter	Biological invasions in terrestrial Antarctica: what is the current status and can we respond?	BIODIVERSITY AND CONSERVATION		1031	10.1007/s10531-015-0896-6	2015	0960-3115
Pautasso, Marco; Schlegel, Markus; Holdenrieder, Ottmar	Forest Health in a Changing World	MICROBIAL ECOLOGY		826	10.1007/s00248-014-0545-8	2015	0095-3628
Holmes, Nick D.; Griffiths, Richard; Pott, Madeleine; Alifano, Aurora; Will, David; Wegmann, Alexander S.; Russell, James C.	Factors associated with rodent eradication failure	BIOLOGICAL CONSERVATION		8	10.1016/j.biocon.2014.12.018	2015	0006-3207
Campbell, Lesley G.; Parker, Rebecca J.; Blakelock, Graham; Pirimova, Natalia; Mercer, Kristin L.	MATERNAL ENVIRONMENT INFLUENCES PROPAGULE PRESSURE OF AN INVASIVE PLANT, RAPHANUS RAPHANISTRUM (BRASSICACEAE)	INTERNATIONAL JOURNAL OF PLANT SCIENCES		393	10.1086/680683	2015	1058-5893
Peters, David C.; Brooke, Jarred M.; Tanner, Evan P.; Unger, Ashley M.; Keyser, Patrick D.; Harper, Craig A.; Clark, Joseph D.; Morgan, John J.	Impact of Experimental Habitat Manipulation on Northern Bobwhite Survival	JOURNAL OF WILDLIFE MANAGEMENT		605	10.1002/jwmg.873	2015	0022-541X
Nuzzo, Victoria; Davalos, Andrea; Blossey, Bernd	Invasive earthworms shape forest seed bank composition	DIVERSITY AND DISTRIBUTIONS		560	10.1111/ddi.12322	2015	1366-9516
Dwyer, John M.; Hobbs, Richard J.; Wainwright, Claire E.; Mayfield, Margaret M.	Climate moderates release from nutrient limitation in natural annual plant communities	GLOBAL ECOLOGY AND BIOGEOGRAPHY		549	10.1111/geb.12277	2015	1466-822X
Jo, Insu; Fridley, Jason D.; Frank, Douglas A.	Linking above- and belowground resource use strategies for native and invasive species of temperate deciduous forests	BIOLOGICAL INVASIONS		1545	10.1007/s10530-014-0814-y	2015	1387-3547
Abrahams, Leslie S.; Griffin, W. Michael; Matthews, H. Scott	Assessment of policies to reduce core forest fragmentation from Marcellus shale development in Pennsylvania	ECOLOGICAL INDICATORS		153	10.1016/j.ecolind.2014.11.031	2015	1470-160X
Joshi, Atul Arvind; Mudappa, Divya; Raman, T. R. Shankar	Invasive alien species in relation to edges and forest structure in tropical rainforest fragments of the Western Ghats	TROPICAL ECOLOGY		233		2015	0564-3295
Dar, Pervaiz A.; Reshi, Zafar A.; Shah, Manzoor A.	Roads act as corridors for the spread of alien plant species in the mountainous regions: A case study of Kashmir Valley, India	TROPICAL ECOLOGY		183		2015	0564-3295
McCleery, Robert A.; Sovie, Adia; Reed, Robert N.; Cunningham, Mark W.; Hunter, Margaret E.; Hart, Kristen M.	Marsh rabbit mortalities tie pythons to the precipitous decline of mammals in the Everglades	PROCEEDINGS OF THE ROYAL SOCIETY B-BIOLOGICAL SCIENCES			10.1098/rspb.2015.0120	2015	0962-8452
McCleery, Robert A; Sovie, Adia; Reed, Robert N; Cunningham, Mark W; Hunter, Margaret E; Hart, Kristen M	Marsh rabbit mortalities tie pythons to the precipitous decline of mammals in the Everglades.	Proceedings. Biological sciences / The Royal Society			10.1098/rspb.2015.0120	2015
Comeau, Luc A.; Filgueira, Ramon; Guyondet, Thomas; Sonier, Remi	The impact of invasive tunicates on the demand for phytoplankton in longline mussel farms	AQUACULTURE		95	10.1016/j.aquaculture.2015.02.018	2015	0044-8486
Kao, Daniel; Saeedi, Bejan; Schwisow, Kayla; Colgan, Sean; Kominsky, Douglas	Intestinal epithelial ecto-5 '-nucleotidase CD73 regulates the homeostasis of Salmonella typhimurium and commensal bacteria	FASEB JOURNAL				2015	0892-6638
Flanagan, Neal E.; Richardson, Curtis J.; Ho, Mengchi	Connecting differential responses of native and invasive riparian plants to climate change and environmental alteration	ECOLOGICAL APPLICATIONS		753	10.1890/14-0767.1	2015	1051-0761
Takakura, Koh-Ichi; Fujii, Shinji	Island biogeography as a test of reproductive interference	POPULATION ECOLOGY		307	10.1007/s10144-015-0489-y	2015	1438-3896
Forsyth, David M.; Scroggie, Michael P.; Arthur, Anthony D.; Lindeman, Michael; Ramsey, David S. L.; McPhee, Steven R.; Bloomfield, Tim; Stuart, Ivor G.	Density-dependent effects of a widespread invasive herbivore on tree survival and biomass during reforestation	ECOSPHERE			10.1890/ES14-00453.1	2015	2150-8925
Hatteland, Bjorn A.; Solhoy, Torstein; Schander, Christoffer; Skage, Morten; von Proschwitz, Ted; Noble, Leslie R.	INTROGRESSION AND DIFFERENTIATION OF THE INVASIVE SLUG ARION VULGARIS FROM NATIVE A. ATER	MALACOLOGIA		303		2015	0076-2997
Gang Chen; Metz, M.R.; Rizzo, D.M.; Dillon, W.W.; Meentemeyer, R.K.	Object-based assessment of burn severity in diseased forests using high-spatial and high-spectral resolution MASTER airborne imagery	ISPRS Journal of Photogrammetry and Remote Sensing		38	10.1016/j.isprsjprs.2015.01.004	2015	0924-2716
Jandova, Katerina; Dostal, Petr; Cajthaml, Tomas; Kamenik, Zdenek	Intraspecific variability in allelopathy of Heracleum mantegazzianum is linked to the metabolic profile of root exudates	ANNALS OF BOTANY		821	10.1093/aob/mcu265	2015	0305-7364
Sun, Yan; Mueller-Schaerer, Heinz; Maron, John L.; Schaffner, Urs	BIOGEOGRAPHIC EFFECTS ON EARLY ESTABLISHMENT OF AN INVASIVE ALIEN PLANT	AMERICAN JOURNAL OF BOTANY		621	10.3732/ajb.1400451	2015	0002-9122
Roa-Fuentes, L. L.; Martinez-Garza, C.; Etchevers, J.; Campo, J.	RECOVERY OF SOIL C AND N IN A TROPICAL PASTURE: PASSIVE AND ACTIVE RESTORATION	LAND DEGRADATION & DEVELOPMENT		201	10.1002/ldr.2197	2015	1085-3278
Shinohara, Yoshinori; Otsuki, Kyoichi	Comparisons of soil-water content between a Moso bamboo (Phyllostachys pubescens) forest and an evergreen broadleaved forest in western Japan	PLANT SPECIES BIOLOGY		96	10.1111/1442-1984.12076	2015	0913-557X
Carvalho, Mariana; Palmeirim, Jorge M.; Rego, Francisco C.; Sole, Nelson; Santana, Aristides; Fa, John E.	What motivates hunters to target exotic or endemic species on the island of Sao Tome, Gulf of Guinea?	ORYX		278	10.1017/S0030605313000550	2015	0030-6053
Clause, Julia; Forey, Estelle; Lortie, Christopher J.; Lambert, Adam M.; Barot, Sebastien	Non-native earthworms promote plant invasion by ingesting seeds and modifying soil properties	ACTA OECOLOGICA-INTERNATIONAL JOURNAL OF ECOLOGY		10	10.1016/j.actao.2015.02.004	2015	1146-609X
Campbell, Colin; Yang, Suann; Albert, Reka; Shea, Katriona	Plant-pollinator community network response to species invasion depends on both invader and community characteristics	OIKOS		406	10.1111/oik.02039	2015	0030-1299
Lai, Hao Ran; Mayfield, Margaret M.; Gay-des-combes, Justine M.; Spiegelberger, Thomas; Dwyer, John M.	Distinct invasion strategies operating within a natural annual plant system	ECOLOGY LETTERS		336	10.1111/ele.12414	2015	1461-023X
Paprocki, Neil; Glenn, Nancy F.; Atkinson, Eric C.; Strickler, Katherine M.; Watson, Christine; Heath, Julie A.	Changing Habitat Use Associated With Distributional Shifts of Wintering Raptors	JOURNAL OF WILDLIFE MANAGEMENT		402	10.1002/jwmg.848	2015	0022-541X
Ramos, Nina Celli; Gastauer, Markus; Campos Cordeiro, Anais de Almeida; Alves Meira-Neto, Joao Augusto	Environmental filtering of agroforestry systems reduces the risk of biological invasion	AGROFORESTRY SYSTEMS		279	10.1007/s10457-014-9765-7	2015	0167-4366
Bahlai, Christine A.; Colunga-Garcia, Manuel; Gage, Stuart H.; Landis, Douglas A.	The role of exotic ladybeetles in the decline of native ladybeetle populations: evidence from long-term monitoring	BIOLOGICAL INVASIONS		1005	10.1007/s10530-014-0772-4	2015	1387-3547
Martyniuk, Nicolas A.; Morales, Carolina L.; Aizen, Marcelo A.	Invasive conifers reduce seed set of a native Andean cedar through heterospecific pollination competition	BIOLOGICAL INVASIONS		1055	10.1007/s10530-014-0775-1	2015	1387-3547
Constan-Nava, Soraya; Soliveres, Santiago; Torices, Ruben; Serra, Lluis; Bonet, Andreu	Direct and indirect effects of invasion by the alien tree Ailanthus altissima on riparian plant communities and ecosystem multifunctionality	BIOLOGICAL INVASIONS		1095	10.1007/s10530-014-0780-4	2015	1387-3547
Metlen, Kerry L.; Callaway, Ragan M.	Native North American pine attenuates the competitive effects of a European invader on native grasses	BIOLOGICAL INVASIONS		1227	10.1007/s10530-014-0790-2	2015	1387-3547
Gregoire, Dorthea M.; Quiring, Dan T.; Royer, Lucie; Heard, Stephen B.; Bauce, Eric	Indirect host-mediated effects of an exotic phloem-sap feeder on a native defoliator of balsam fir	FOREST ECOLOGY AND MANAGEMENT		1	10.1016/j.foreco.2015.01.001	2015	0378-1127
Jandova, Katerina; Dostal, Petr; Cajthaml, Tomas	Searching for Heracleum mantegazzianum allelopathy in vitro and in a garden experiment	BIOLOGICAL INVASIONS		987	10.1007/s10530-014-0771-5	2015	1387-3547
Emura, Naoko; Furuya, Wataru; Ando, Haruko; Deguchi, Tomohiro	Monitoring of Avifauna to Estimate the Effect of Ecological Restoration in Mukojima, Bonin Islands	Journal of the Yamashina Institute for Ornithology		89		2015	1348-5032
Liu, Xuan; Luo, Yu; Chen, Jiaxin; Guo, Yisong; Bai, Changming; Li, Yiming	Diet and Prey Selection of the Invasive American Bullfrog (Lithobates catesbeianus) in Southwestern China	ASIAN HERPETOLOGICAL RESEARCH		34		2015	2095-0357
Zhang, Fang; Zhao, Juan; Zhang, Yujie; Messenger, Kevin; Wang, Yong	Antipredator Behavioral Responses of Native and Exotic Tadpoles to Novel Predator	ASIAN HERPETOLOGICAL RESEARCH		51		2015	2095-0357
Souza-Alonso, Pablo; Guisande, Alejandra; Gonzalez, Luis	Structural changes in soil communities after triclopyr application in soils invaded by Acacia dealbata Link	JOURNAL OF ENVIRONMENTAL SCIENCE AND HEALTH PART B-PESTICIDES FOOD CONTAMINANTS AND AGRICULTURAL WASTES		184	10.1080/03601234.2015.982419	2015	0360-1234
Griffen, Blaine D.; Vogel, Margaret; Goulding, Lacey; Hartman, Rachel	Energetic effects of diet choice by invasive Asian shore crabs: implications for persistence when prey are scarce	MARINE ECOLOGY PROGRESS SERIES		181	10.3354/meps11160	2015	0171-8630
Martine, Christopher T.; Hale, Alison N.	Parasitism disruption a likely consequence of belowground war waged by exotic plant invader	AMERICAN JOURNAL OF BOTANY		327	10.3732/ajb.1500025	2015	0002-9122
Bloch, Christopher P.; Curry, Kevin D.; Jahoda, John C.	Long-term Effects of an Invasive Shore Crab on Cape Cod, Massachusetts	NORTHEASTERN NATURALIST		178	10.1656/045.022.0118	2015	1092-6194
Ewing, Holly A.; Tuininga, Amy R.; Groffman, Peter M.; Weathers, Kathleen C.; Fahey, Timothy J.; Fisk, Melany C.; Bohlen, Patrick J.; Suarez, Esteban	Earthworms Reduce Biotic 15-Nitrogen Retention in Northern Hardwood Forests	ECOSYSTEMS		328	10.1007/s10021-014-9831-z	2015	1432-9840
Piper, Candace L.; Siciliano, Steven D.; Winsley, Tristrom; Lamb, Eric G.	Smooth brome invasion increases rare soil bacterial species prevalence, bacterial species richness and evenness	JOURNAL OF ECOLOGY		386	10.1111/1365-2745.12356	2015	0022-0477
Ikeda, Hiroshi; Callaham, Mac A., Jr.; O'Brien, Joseph J.; Hornsby, Benjamin S.; Wenk, Evelyn S.	Can the invasive earthworm, Amynthas agrestis, be controlled with prescribed fire?	SOIL BIOLOGY & BIOCHEMISTRY		21	10.1016/j.soilbio.2014.12.011	2015	0038-0717
Jakobsson, Anna; Padron, Benigno; Agren, Jon	Distance-dependent effects of invasive Lupinus polyphyllus on pollination and reproductive success of two native herbs	BASIC AND APPLIED ECOLOGY		120	10.1016/j.baae.2014.12.005	2015	1439-1791
Lee, Donna J.; Motoki, Michael; Vanderwoude, Casper; Nakamoto, Stuart T.; Leung, PingSun	Taking the sting out of Little Fire Ant in Hawaii	ECOLOGICAL ECONOMICS		100	10.1016/j.ecolecon.2015.01.010	2015	0921-8009
Gidoin, Cindy; Roques, Lionel; Boivin, Thomas	Linking niche theory to ecological impacts of successful invaders: insights from resource fluctuation-specialist herbivore interactions	JOURNAL OF ANIMAL ECOLOGY		396	10.1111/1365-2656.12303	2015	0021-8790
Paterson, Rachel A.; Dick, Jaimie T. A.; Pritchard, Daniel W.; Ennis, Marilyn; Hatcher, Melanie J.; Dunn, Alison M.	Predicting invasive species impacts: a community module functional response approach reveals context dependencies	JOURNAL OF ANIMAL ECOLOGY		453	10.1111/1365-2656.12292	2015	0021-8790
Mirande, Luciana; Desneux, Nicolas; Haramboure, Marina; Ines Schneider, Marcela	Intraguild predation between an exotic and a native coccinellid in Argentina: the role of prey density	JOURNAL OF PEST SCIENCE		155	10.1007/s10340-014-0597-z	2015	1612-4758
Shannon-Firestone, Sarah; Firestone, Jeffrey	Allelopathic potential of invasive species is determined by plant and soil community context	PLANT ECOLOGY		491	10.1007/s11258-015-0453-0	2015	1385-0237
Jacobs, G. S.; Sluckin, T. J.	Long-range dispersal, stochasticity and the broken accelerating wave of advance	THEORETICAL POPULATION BIOLOGY		39	10.1016/j.tpb.2014.12.003	2015	0040-5809
Werner, Gijsbert D. A.; Kiers, E. Toby	Order of arrival structures arbuscular mycorrhizal colonization of plants	NEW PHYTOLOGIST		1515	10.1111/nph.13092	2015	0028-646X
Shackleton, Ross T.; Le Maitre, David C.; Richardson, David M.	Prosopis invasions in South Africa: Population structures and impacts on native tree population stability	JOURNAL OF ARID ENVIRONMENTS		70	10.1016/j.jaridenv.2014.11.006	2015	0140-1963
Sardari, A. Asadi; Jalali, A. A. Hojat; Bahraminejad, S.; Safaee, D.	Effect of plant extracts on the mortality of root-knot nematodes' J(2), Meloidogyne javanica	Archives of Phytopathology and Plant Protection		365	10.1080/03235408.2014.889342	2015	0323-5408
Uy, Karen L.; LeDuc, R.; Ganote, C.; Price, Donald K.	Physiological effects of heat stress on Hawaiian picture-wing Drosophila: genome-wide expression patterns and stress-related traits	CONSERVATION PHYSIOLOGY			10.1093/conphys/cou062	2015	2051-1434
Orozco-Aceves, Martha; Standish, Rachel J.; Tibbett, Mark	Long-term conditioning of soil by plantation eucalypts and pines does not affect growth of the native jarrah tree	FOREST ECOLOGY AND MANAGEMENT		92	10.1016/j.foreco.2014.11.007	2015	0378-1127
Rubino, Lucy; Charles, Sherley; Sirulnik, Abby G.; Tuininga, Amy R.; Lewis, James D.	Invasive insect effects on nitrogen cycling and host physiology are not tightly linked	TREE PHYSIOLOGY		124	10.1093/treephys/tpv004	2015	0829-318X
Ceplova, Natalie; Lososova, Zdenka; Zeleny, David; Chytry, Milan; Danihelka, Jiri; Fajmon, Karel; Lanikova, Deana; Preislerova, Zdenka; Rehorek, Vladimir; Tichy, Lubomir	Phylogenetic diversity of central-European urban plant communities: effects of alien species and habitat types	PRESLIA		1		2015	0032-7786
Repka, Radomir; Sebesta, Jan; Madera, Petr; Vahalik, Petr	Comparison of the floodplain forest floristic composition of two riparian corridors: species richness, alien species and the effect of water regime changes	BIOLOGIA		208	10.1515/biolog-2015-0021	2015	0006-3088
Salinas, Rene A.; Stiver, William H.; Corn, Joseph L.; Lenhart, Suzanne; Collins, Charles; Madden, Marguerite; Vercauteren, Kurt C.; Schmit, Brandon B.; Kasari, Ellen; Odoi, Agricola; Hickling, Graham; Mccallum, Hamish	AN INDIVIDUAL-BASED MODEL FOR FERAL HOGS IN GREAT SMOKY MOUNTAINS NATIONAL PARK	NATURAL RESOURCE MODELING		18	10.1111/nrm.12055	2015	0890-8575
Miller-Pierce, M.; Shaw, D. C.; Demarco, A.; Oester, P. T.	Introduced and Native Parasitoid Wasps Associated With Larch Casebearer (Lepidoptera: Coleophoridae) in Western Larch	ENVIRONMENTAL ENTOMOLOGY		27	10.1093/ee/nvu016	2015	0046-225X
Podrouzkova, Stepanka; Janovsky, Zdenek; Horackova, Jitka; Jurickova, Lucie	Do snails eat exotic plant species invading river floodplains?	JOURNAL OF MOLLUSCAN STUDIES		139	10.1093/mollus/eyu073	2015	0260-1230
Horn, Josh; Escobedo, Francisco J.; Hinkle, Ross; Hostetler, Mark; Timilsina, Nilesh	The Role of Composition, Invasives, and Maintenance Emissions on Urban Forest Carbon Stocks	ENVIRONMENTAL MANAGEMENT		431	10.1007/s00267-014-0400-1	2015	0364-152X
Jauni, Miia; Gripenberg, Sofia; Ramula, Satu	Non-native plant species benefit from disturbance: a meta-analysis	OIKOS		122	10.1111/oik.01416	2015	0030-1299
Del Fabbro, Corina; Prati, Daniel	The relative importance of immediate allelopathy and allelopathic legacy in invasive plant species	BASIC AND APPLIED ECOLOGY		28	10.1016/j.baae.2014.10.007	2015	1439-1791
Rotter, Michael C.; Rebertus, Alan J.	Plant community development of Isle Royale's moose-spruce savannas	BOTANY		75	10.1139/cjb-2014-0173	2015	1916-2790
Rassati, Davide; Faccoli, Massimo; Toffolo, Edoardo Petrucco; Battisti, Andrea; Marini, Lorenzo	Improving the early detection of alien wood-boring beetles in ports and surrounding forests	JOURNAL OF APPLIED ECOLOGY		50	10.1111/1365-2664.12347	2015	0021-8901
Iannone, Basil V., III; Heneghan, Liam; Rijal, Dev; Wise, David H.	Below-ground causes and consequences of woodland shrub invasions: a novel paired-point framework reveals new insights	JOURNAL OF APPLIED ECOLOGY		78	10.1111/1365-2664.12354	2015	0021-8901
Li, Shao-peng; Guo, Tao; Cadotte, Marc W.; Chen, Yong-jian; Kuang, Jia-liang; Hua, Zheng-shuang; Zeng, Yi; Song, Ying; Liu, Zheng; Shu, Wen-sheng; Li, Jin-tian	Contrasting effects of phylogenetic relatedness on plant invader success in experimental grassland communities	JOURNAL OF APPLIED ECOLOGY		89	10.1111/1365-2664.12365	2015	0021-8901
Johnson, Daniel J.; Flory, S. Luke; Shelton, Angela; Huebner, Cynthia; Clay, Keith	Interactive effects of a non-native invasive grass Microstegium vimineum and herbivore exclusion on experimental tree regeneration under differing forest management	JOURNAL OF APPLIED ECOLOGY		210	10.1111/1365-2664.12356	2015	0021-8901
Branco, Sofia; Videira, Nuno; Branco, Manuela; Paiva, Maria Rosa	A review of invasive alien species impacts on eucalypt stands and citrus orchards ecosystem services: Towards an integrated management approach	JOURNAL OF ENVIRONMENTAL MANAGEMENT		17	10.1016/j.jenvman.2014.09.026	2015	0301-4797
McCallum, Jamie W.; Vasilijevic, Maja; Cuthill, Innes	Assessing the benefits of Transboundary Protected Areas: A questionnaire survey in the Americas and the Caribbean	JOURNAL OF ENVIRONMENTAL MANAGEMENT		245	10.1016/j.jenvman.2014.10.013	2015	0301-4797
de Araujo, Walter Santos; Tscharntke, Teja; Almeida-Neto, Mario	Global effects of land use intensity on the impoverishment of insect herbivore assemblages	BIODIVERSITY AND CONSERVATION		271	10.1007/s10531-014-0807-2	2015	0960-3115
Nickerson, Katherine; Flory, S. Luke	Competitive and allelopathic effects of the invasive shrub Schinus terebinthifolius (Brazilian peppertree)	BIOLOGICAL INVASIONS		555	10.1007/s10530-014-0748-4	2015	1387-3547
Campbell, Steven P.; Frair, Jacqueline L.; Gibbs, James P.; Rundell, Rebecca J.	Coexistence of the endangered, endemic Chittenango ovate amber snail (Novisuccinea chittenangoensis) and a non-native competitor	BIOLOGICAL INVASIONS		711	10.1007/s10530-014-0763-5	2015	1387-3547
Chollet, Simon; Bergman, Carita; Gaston, Anthony J.; Martin, Jean-Louis	Long-term consequences of invasive deer on songbird communities: Going from bad to worse?	BIOLOGICAL INVASIONS		777	10.1007/s10530-014-0768-0	2015	1387-3547
Ramirez, Lirey A.; Rada, Fermin; Llambi, Luis D.	Linking patterns and processes through ecosystem engineering: effects of shrubs on microhabitat and water status of associated plants in the high tropical Andes	PLANT ECOLOGY		213	10.1007/s11258-014-0429-5	2015	1385-0237
Piper, Candace L.; Lamb, Eric G.; Siciliano, Steven D.	Smooth brome changes gross soil nitrogen cycling processes during invasion of a rough fescue grassland	PLANT ECOLOGY		235	10.1007/s11258-014-0431-y	2015	1385-0237
te Beest, Mariska; Esler, Karen J.; Richardson, David M.	Linking functional traits to impacts of invasive plant species: a case study	PLANT ECOLOGY		293	10.1007/s11258-014-0437-5	2015	1385-0237
Hogg, Brian N.; Daane, Kent M.	Impacts of exotic spider spillover on resident arthropod communities in a natural habitat	ECOLOGICAL ENTOMOLOGY		69	10.1111/een.12162	2015	0307-6946
Gagne, Roderick B.; Hogan, J. Derek; Pracheil, Brenda M.; Mcintyre, Peter B.; Hain, Ernie F.; Gilliam, James F.; Blum, Michael J.	Spread of an introduced parasite across the Hawaiian archipelago independent of its introduced host	FRESHWATER BIOLOGY		311	10.1111/fwb.12491	2015	0046-5070
Vila, Montserrat; Rohr, Rudolf P.; Espinar, Jose L.; Hulme, Philip E.; Pergl, Jan; Le Roux, Johannes J.; Schaffner, Urs; Pysek, Petr	Explaining the variation in impacts of non-native plants on local-scale species richness: the role of phylogenetic relatedness	GLOBAL ECOLOGY AND BIOGEOGRAPHY		139	10.1111/geb.12249	2015	1466-822X
de Araujo, Walter Santos; Vieira, Marcos Costa; Lewinsohn, Thomas M.; Almeida-Neto, Myrio	Contrasting Effects of Land Use Intensity and Exotic Host Plants on the Specialization of Interactions in Plant-Herbivore Networks	PLOS ONE			10.1371/journal.pone.0115606	2015	1932-6203
Vidal, Osvaldo J.; Aguayo, Mauricio; Niculcar, Roberto; Bahamonde, Nelson; Radic, Sergio; San Martin, Cristina; Kusch, Alejandro; Latorre, Javier; Felez, Jorge	Invasive plants in Torres del Paine National Park (Magallanes, Chile): current knowledge, post-fire distribution and implications for ecological restoration	Anales del Instituto de la Patagonia		75		2015	0718-686X
Quinn, Lauren D.	What Would Invasive Feedstock Populations Look Like? Perspectives from Existing Invasions	Bioenergy and Biological Invasions: Ecological, Agronomic, and Policy Perspectives on Minimizing Risk		12		2015
Del Fabbro, Corina; Prati, Daniel	Invasive plant species do not create more negative soil conditions for other plants than natives	PERSPECTIVES IN PLANT ECOLOGY EVOLUTION AND SYSTEMATICS		87	10.1016/j.ppees.2015.02.002	2015	1433-8319
Hovick, Stephen M.; Carson, Walter P.	Tailoring biocontrol to maximize top-down effects: on the importance of underlying site fertility	ECOLOGICAL APPLICATIONS		125	10.1890/13-2050.1	2015	1051-0761
Swinbourne, Michael J.; Taggart, David A.; Sparrow, Elisa; Hatch, Michael; Ostendorf, Bertram	Ground penetrating radar as a non-invasive tool to better understand the population dynamics of a fossorial species: mapping the warrens of southern hairy-nosed wombats (Lasiorhinus latifrons)	WILDLIFE RESEARCH		678	10.1071/WR15068	2015	1035-3712
Habeck, Christopher W.; Schultz, Alexis K.	Community-level impacts of white-tailed deer on understorey plants in North American forests: a meta-analysis	AOB PLANTS			10.1093/aobpla/plv119	2015	2041-2851
Lembrechts, Jonas J.; Milbau, Ann; Nijs, Ivan	Trade-off between competition and facilitation defines gap colonization in mountains	AOB PLANTS			10.1093/aobpla/plv128	2015	2041-2851
Pejchar, Liba	Introduced birds incompletely replace seed dispersal by a native frugivore	AOB PLANTS			10.1093/aobpla/plv072	2015	2041-2851
Padulles Cubino, Josep; Vila Subiros, Josep; Barriocanal Lozano, Caries	Propagule pressure from invasive plant species in gardens in low-density suburban areas of the Costa Brava (Spain)	URBAN FORESTRY & URBAN GREENING		941	10.1016/j.ufug.2015.09.002	2015	1618-8667
Sarnat, Eli M.; Fischer, Georg; Guenard, Benoit; Economo, Evan P.	Introduced Pheidole of the world: taxonomy, biology and distribution	ZOOKEYS		1	10.3897/zookeys.543.6050	2015	1313-2989
Batson, William; Abbott, Rachael; Richardson, Kate M.	Release strategies for fauna reintroductions: theory and tests	Advances in Reintroduction Biology of Australian and New Zealand Fauna		7		2015
Lembrechts, Jonas J; Milbau, Ann; Nijs, Ivan	Trade-off between competition and facilitation defines gap colonization in mountains.	AoB PLANTS			10.1093/aobpla/plv128	2015
Balezentiene, Ligita	IMMEDIATE ALLELOPATHIC EFFECT OF TWO INVASIVE HERACLEUM SPECIES ON ACCEPTOR-GERMINATION	Acta Biologica Universitatis Daugavpiliensis		17		2015	1407-8953
Jauni, Miia; Ramula, Satu	Meta-analysis on the effects of exotic plants on the fitness of native plants	PERSPECTIVES IN PLANT ECOLOGY EVOLUTION AND SYSTEMATICS		412	10.1016/j.ppees.2015.06.002	2015	1433-8319
Kidd, Petra; Mench, Michel; Alvarez-Lopez, Vanessa; Bert, Valerie; Dimitriou, Ioannis; Friesl-Hanl, Wolfgang; Herzig, Rolf; Janssen, Jolien Olga; Kolbas, Aliaksandr; Mueller, Ingo; Neu, Silke; Renella, Giancarlo; Ruttens, Ann; Vangronsveld, Jaco; Puschenreiter, Markus	Agronomic Practices for Improving Gentle Remediation of Trace Element-Contaminated Soils	INTERNATIONAL JOURNAL OF PHYTOREMEDIATION		1005	10.1080/15226514.2014.1003788	2015	1522-6514
[Anonymous]	Genetic Diversity and Spatial Structure of a Population the Natural Monument(No. 432) Cymbidium kanran in Sanghyo-dong, Jeju-do	Journal of Agriculture & Life Science		1	10.14397/jals.2015.49.5.1	2015	1598-5504
	Wildlife Habitat Conservation: Concepts, Challenges, and Solutions	Wildlife Habitat Conservation: Concepts, Challenges, and Solutions				2015
Lockwood, Julie L.; Burkhalter, J. Curtis	The Impact of Invasive Species on Wildlife Habitat	Wildlife Habitat Conservation: Concepts, Challenges, and Solutions		102		2015
Boll, Piter K.; Rossi, Ilana; Amaral, Silvana V.; Leal-Zanchet, Ana	A taste for exotic food: Neotropical land planarians feeding on an invasive flatworm	PeerJ			10.7717/peerj.1307	2015	2167-8359
Yudina, R.S.; Leonova, I.N.; Salina, E.A.; Khlestkina, E.K.	Change of salt tolerance in common wheat after introgression of genetic material from Aegilops speltoides and Triticum timopheevii	Vavilovskii zhurnal genetiki i selektsii		21		2015	1814-554X
Banks, Peter B.; Smith, Helen M.	The ecological impacts of commensal species: black rats, Rattus rattus, at the urban-bushland interface	WILDLIFE RESEARCH		86	10.1071/WR15048	2015	1035-3712
Bertolino, Sandro; Colangelo, Paolo; Mori, Emiliano; Capizzi, Dario	Good for management, not for conservation: an overview of research, conservation and management of Italian small mammals	HYSTRIX-ITALIAN JOURNAL OF MAMMALOGY		25	10.4404/hystrix-26.1-10263	2015	0394-1914
Radford, Ian J.; Fairman, Richard	Fauna and vegetation responses to fire and invasion by toxic cane toads (Rhinella marina) in an obligate seeder-dominated tropical savanna in the Kimberley, northern Australia	WILDLIFE RESEARCH		302	10.1071/WR14259	2015	1035-3712
Coulson, Stephen J.	The alien terrestrial invertebrate fauna of the High Arctic archipelago of Svalbard: potential implications for the native flora and fauna	POLAR RESEARCH			10.3402/polar.v34.27364	2015	0800-0395
Perevaryukha, A. Yu.	A MODEL OF THE DEVELOPMENT OF SPONTANEOUS POPULATION OUTBREAK OF AN INSECT WITH APERIODICAL DYNAMICS	Entomologicheskoe Obozrenie		203		2015	0367-1445
Shen, Shicai; Xu, Gaofeng; Clements, David Roy; Jin, Guimei; Liu, Shufang; Zhang, Fudou; Yang, Yanxian; Chen, Aidong; Kato-Noguchi, Hisashi	Effects of Invasive Plant Mikania micrantha on Plant Community and Diversity in Farming Systems	Asian Journal of Plant Sciences		27	10.3923/ajps.2015.27.33	2015	1682-3974
Pedrosa, Felipe; Salerno, Rafael; Borges Padilha, Fabio Vinicius; Galetti, Mauro	Current distribution of invasive feral pigs in Brazil: economic impacts and ecological uncertainty	NATUREZA & CONSERVACAO		84	10.1016/j.ncon.2015.04.005	2015	1679-0073
PERKINS N C; MCGINNIS R S; COPPLE B R	Monitoring apparatus for assessing head and torso orientation of subject or player during physical motion in sports has CPU that calculates orientation of head and torso in response to acceleration data and angular rate gyro data
Gillespie, Lynn J; Saarela, Jeffery M; Sokoloff, Paul C; Bull, Roger D	New vascular plant records for the Canadian Arctic Archipelago.	PhytoKeys		23	10.3897/phytokeys.52.8721	2015	1314-2011
Traveset, Anna; Chamorro, Susana; Olesen, Jens M.; Heleno, Ruben	Space, time and aliens: charting the dynamic structure of Galapagos pollination networks	AOB PLANTS			10.1093/aobpla/plv068	2015	2041-2851
Pejchar, Liba	Introduced birds incompletely replace seed dispersal by a native frugivore.	AoB PLANTS			10.1093/aobpla/plv072	2015
Traveset, Anna; Chamorro, Susana; Olesen, Jens M; Heleno, Ruben	Space, time and aliens: charting the dynamic structure of Galapagos pollination networks.	AoB PLANTS			10.1093/aobpla/plv068	2015
Jaric, Snezana V.; Karadzic, Branko D.; Vrbnicanin, Sava P.; Mitrovic, Miroslava M.; Kostic, Olga A.; Pavlovic, Pavle Z.	FLORISTIC AND PHYTOCOENOLOGICAL RESEARCH OF SEGETAL PLANT COMMUNITIES IN CULTIVATED AREAS OF SOUTHERN SREM	ARCHIVES OF BIOLOGICAL SCIENCES		591	10.2298/ABS141017021J	2015	0354-4664
Gillespie, Lynn J.; Saarela, Jeffery M.; Sokoloff, Paul C.; Bull, Roger D.	New vascular plant records for the Canadian Arctic Archipelago	PHYTOKEYS		23	10.3897/phytokeys.52.8721	2015	1314-2011
Stricker, Kerry Bohl; Hagan, Donald; Flory, S. Luke	Improving methods to evaluate the impacts of plant invasions: lessons from 40 years of research	AOB PLANTS			10.1093/aobpla/plv028	2015	2041-2851
Gonzalez-Munoz, Noelia; Carlos Linares, Juan; Castro-Diez, Pilar; Sass-Klaassen, Ute	Contrasting secondary growth and water-use efficiency patterns in native and exotic trees co-occurring in inner Spain riparian forests	FOREST SYSTEMS			10.5424/fs/2015241-06586	2015	2171-5068
Parker, Amie N.; Minor, Maria A.	Native and adventive detritivores (Diplopoda, Isopoda and Amphipoda) in a modified landscape: influence of forest type and edge	NEW ZEALAND JOURNAL OF ECOLOGY		323		2015	0110-6465
Oswalt, Christopher M.; Fei, Songlin; Guo, Qinfeng; Iannone, Basil V., III; Oswalt, Sonja N.; Pijanowski, Bryan C.; Potter, Kevin M.	A subcontinental view of forest plant invasions	NEOBIOTA		49	10.3897/neobiota.24.8378	2015	1619-0033
Molina-Montenegro, Marco A.; Oses, Romulo; Torres-Diaz, Cristian; Atala, Cristian; Nunez, Martin A.; Armas, Cristina	Fungal endophytes associated with roots of nurse cushion species have positive effects on native and invasive beneficiary plants in an alpine ecosystem	PERSPECTIVES IN PLANT ECOLOGY EVOLUTION AND SYSTEMATICS		218	10.1016/j.ppees.2015.02.003	2015	1433-8319
McMaster, Melissa A.; Thode, Andrea; Kearsley, Michael	Post-fire seeding with ryegrass: implications for understorey plant communities and overall effectiveness	INTERNATIONAL JOURNAL OF WILDLAND FIRE		518	10.1071/WF13013	2015	1049-8001
Flower, Charles E.; Gonzalez-Meler, Miquel A.	Responses of Temperate Forest Productivity to Insect and Pathogen Disturbances	ANNUAL REVIEW OF PLANT BIOLOGY, VOL 66		547	10.1146/annurev-arplant-043014-115540	2015	1543-5008
Garcia, Rafael A.; Engler, Maria L.; Pena, Eduardo; Pollnac, Fredric W.; Pauchard, Anibal	Fuel characteristics of the invasive shrub Teline monspessulana (L.) K. Koch	INTERNATIONAL JOURNAL OF WILDLAND FIRE		372	10.1071/WF13078	2015	1049-8001
Shelby, Natasha; Peterson, Merrill A.	Despite Extensive Pollinator Sharing, Invasive Blackberry Has Negligible Impacts on Reproductive Success of a Rare Native Wildflower	NORTHWEST SCIENCE		47		2015	0029-344X
Yang, Hai-xia; Guo, Shao-xia; Liu, Run-jin	[Characteristics of arbuscular mycorrhizal fungal diversity and functions in saline-alkali land].	Ying yong sheng tai xue bao = The journal of applied ecology / Zhongguo sheng tai xue xue hui, Zhongguo ke xue yuan Shenyang ying yong sheng tai yan jiu suo zhu ban		311		2015	1001-9332
Thapa, Sundar; Meyling, Nicolai V.; Katakam, Kiran K.; Thamsborg, Stig M.; Mejer, Helena	A method to evaluate relative ovicidal effects of soil microfungi on thick-shelled eggs of animal-parasitic nematodes	BIOCONTROL SCIENCE AND TECHNOLOGY		756	10.1080/09583157.2015.1016396	2015	0958-3157
Pile, Lauren S.; Wang, Geofeng Geoff; Polomski, Robert; Yarrow, Greg; Stuyck, Claire M.	Potential for Nonnative Endozoochorous Seed Dispersal by White-Tailed Deer in a Southeastern Maritime Forest	INVASIVE PLANT SCIENCE AND MANAGEMENT		32	10.1614/IPSM-D-14-00027.1	2015	1939-7291
Shields, Joshua M.; Jenkins, Michael A.; Saunders, Michael R.; Gibson, Kevin D.; Zollner, Patrick A.; Dunning, John B.	Influence of Intensity and Duration of Invasion by Amur Honeysuckle (Lonicera maackii) on Mixed Hardwood Forests of Indiana	INVASIVE PLANT SCIENCE AND MANAGEMENT		44	10.1614/IPSM-D-14-00044.1	2015	1939-7291
Stricker, Kerry Bohl; Hagan, Donald; Flory, S Luke	Improving methods to evaluate the impacts of plant invasions: lessons from 40 years of research.	AoB PLANTS			10.1093/aobpla/plv028	2015
Galle, Robert; Erdelyi, Nora; Szpisjak, Nikolett; Toelgyesi, Csaba; Maak, Istvan	The effect of the invasive Asclepias syriaca on the ground-dwelling arthropod fauna	BIOLOGIA		104	10.1515/biolog-2015-0011	2015	0006-3088
Chmura, Damian; Tokarska-Guzik, Barbara; Nowak, Teresa; Wozniak, Gabriela; Bzdega, Katarzyna; Koszela, Katarzyna; Gancarek, Malgorzata	The influence of invasive Fallopia taxa on resident plant species in two river valleys (southern Poland)	ACTA SOCIETATIS BOTANICORUM POLONIAE		23	10.5586/asbp.2015.008	2015	0001-6977
Yang Hai-xia; Guo Shao-xia; Liu Run-jin	Characteristics of arbuscular mycorrhizal fungal diversity and functions in saline-alkali land.	Yingyong Shengtai Xuebao		311		2015	1001-9332
Espinar, Jose L.; Diaz-Delgado, Ricardo; Bravo-Utrera, Miguel A.; Vila, Montserrat	Linking Azolla filiculoides invasion to increased winter temperatures in the Donana marshland (SW Spain)	AQUATIC INVASIONS		17	10.3391/ai.2015.10.1.02	2015	1798-6540
Nielsen, J. A.; Frew, R. D.; Whigam, P. A.; Callaway, R. M.; Dickinson, K. J. M.	Germination and growth responses of co-occurring grass species to soil from under invasive Thymus vulgaris	ALLELOPATHY JOURNAL		139		2015	0971-4693
Nolan, Nicole E.; Kulmatiski, Andrew; Beard, Karen H.; Norton, Jeanette M.	Activated carbon decreases invasive plant growth by mediating plant-microbe interactions	AOB PLANTS			10.1093/aobpla/plu072	2015	2041-2851
Herrmann, John D.; Opatovsky, Itai; Lubin, Yael; Pluess, Therese; Gavish-Regev, Efrat; Entling, Martin H.	Effects of non-native Eucalyptus plantations on epigeal spider communities in the northern Negev desert, Israel	JOURNAL OF ARACHNOLOGY		101		2015	0161-8202
Chabaane, Yosra; Laplanche, Diane; Turlings, Ted C. J.; Desurmont, Gaylord A.	Impact of exotic insect herbivores on native tritrophic interactions: a case study of the African cotton leafworm, Spodoptera littoralis and insects associated with the field mustard Brassica rapa	JOURNAL OF ECOLOGY		109	10.1111/1365-2745.12304	2015	0022-0477
Bernard-Verdier, Maud; Hulme, Philip E.	Alien and native plant species play different roles in plant community structure	JOURNAL OF ECOLOGY		143	10.1111/1365-2745.12341	2015	0022-0477
Dobson, Annise; Blossey, Bernd	Earthworm invasion, white-tailed deer and seedling establishment in deciduous forests of north-eastern North America	JOURNAL OF ECOLOGY		153	10.1111/1365-2745.12350	2015	0022-0477
Lyttle, Amy; Yoo, Kyungsoo; Hale, Cindy; Aufdenkampe, Anthony; Sebestyen, Stephen D.; Resner, Kathryn; Blum, Alex	Impact of Exotic Earthworms on Organic Carbon Sorption on Mineral Surfaces and Soil Carbon Inventories in a Northern Hardwood Forest	ECOSYSTEMS		16	10.1007/s10021-014-9809-x	2015	1432-9840
Parkes, John P.; Easdale, Tomas A.; Williamson, Wendy M.; Forsyth, David M.	Causes and consequences of ground disturbance by feral pigs (Sus scrofa) in a lowland New Zealand conifer-angiosperm forest	NEW ZEALAND JOURNAL OF ECOLOGY		34		2015	0110-6465
Randby, Ashild Taksdal; Gismervik, Kristine; Andersen, Arild; Skaar, Ida	Effect of invasive slug populations (Anon vulgaris) on grass silage I. Fermentation quality, in-silo losses and aerobic stability	ANIMAL FEED SCIENCE AND TECHNOLOGY		10	10.1016/j.anifeedsci.2014.09.026	2015	0377-8401
Gismervik, Kristine; Randby, Ashild Taksdal; Rorvik, Liv Marit; Bruheim, Torkjel; Andersen, Arild; Hernandez, Marta; Skaar, Ida	Effect of invasive slug populations (Arlon vulgaris) on grass silage. II: Microbiological quality and feed safety	ANIMAL FEED SCIENCE AND TECHNOLOGY		20	10.1016/j.anifeedsci.2014.09.024	2015	0377-8401
Gantchoff, Mariela Gisele; Belant, Jerrold L.	Anthropogenic and environmental effects on invasive mammal distribution in northern Patagonia, Argentina	MAMMALIAN BIOLOGY		54	10.1016/j.mambio.2014.10.001	2015	1616-5047
Schor, J.; Farwig, N.; Berens, D. G.	Intensive land-use and high native fruit availability reduce fruit removal of the invasive Solanum mauritianum in South Africa	SOUTH AFRICAN JOURNAL OF BOTANY		6	10.1016/j.sajb.2014.11.004	2015	0254-6299
Letnic, Mike; Laffan, Shawn W.; Greenville, Aaron C.; Russell, Benjamin G.; Mitchell, Bruce; Fleming, Peter J. S.	Artificial watering points are focal points for activity by an invasive herbivore but not native herbivores in conservation reserves in arid Australia	BIODIVERSITY AND CONSERVATION		1	10.1007/s10531-014-0770-y	2015	0960-3115
Bateman, H. L.; Merritt, D. M.; Glenn, E. P.; Nagler, P. L.	Indirect effects of biocontrol of an invasive riparian plant (Tamarix) alters habitat and reduces herpetofauna abundance	BIOLOGICAL INVASIONS		87	10.1007/s10530-014-0707-0	2015	1387-3547
Rojas-Sandoval, Julissa; Acevedo-Rodriguez, Pedro	Naturalization and invasion of alien plants in Puerto Rico and the Virgin Islands	BIOLOGICAL INVASIONS		149	10.1007/s10530-014-0712-3	2015	1387-3547
Biswas, Shekhar R.; Kotanen, Peter M.; Kambo, Dasvinder; Wagner, Helene H.	Context-dependent patterns, determinants and demographic consequences of herbivory in an invasive species	BIOLOGICAL INVASIONS		165	10.1007/s10530-014-0715-0	2015	1387-3547
Montgomery, W. Ian; Montgomery, Sally S. J.; Reid, Neil	Invasive alien species disrupt spatial and temporal ecology and threaten extinction in an insular, small mammal community	BIOLOGICAL INVASIONS		179	10.1007/s10530-014-0717-y	2015	1387-3547
Burne, Allan R.; Haywood, John; Lester, Philip J.	Density-dependent effects of an invasive wasp on the morphology of an endemic New Zealand ant	BIOLOGICAL INVASIONS		327	10.1007/s10530-014-0731-0	2015	1387-3547
Peh, Kelvin S. -H.; Balmford, Andrew; Birch, Jennifer C.; Brown, Claire; Butchart, Stuart H. M.; Daley, James; Dawson, Jeffrey; Gray, Gerard; Hughes, Francine M. R.; Mendes, Stephen; Millett, James; Stattersfield, Alison J.; Thomas, David H. L.; Walpole, Matt; Bradbury, Richard B.	Potential impact of invasive alien species on ecosystem services provided by a tropical forested ecosystem: a case study from Montserrat	BIOLOGICAL INVASIONS		461	10.1007/s10530-014-0743-9	2015	1387-3547
Morales-Romero, Daniel; Campo, Julio; Godinez-Alvarez, Hector; Molina-Freaner, Francisco	Soil carbon, nitrogen and phosphorus changes from conversion of thornscrub to buffelgrass pasture in northwestern Mexico	AGRICULTURE ECOSYSTEMS & ENVIRONMENT		231	10.1016/j.agee.2014.09.015	2015	0167-8809
Beans, Carolyn M.; Roach, Deborah A.	AN INVASIVE PLANT ALTERS POLLINATOR-MEDIATED PHENOTYPIC SELECTION ON A NATIVE CONGENER	AMERICAN JOURNAL OF BOTANY		50	10.3732/ajb.1400385	2015	0002-9122
Ali, Jonathan; Lieurance, Deah; Cipollini, Don	Soil biota affect mycorrhizal infection and growth of Impatiens capensis and alter the effects of Lonicera maackii rhizosphere extracts	JOURNAL OF THE TORREY BOTANICAL SOCIETY		1	10.3159/TORREY-D-14-00009.1	2015	1095-5674
Brown, Peter Michael James; Ingels, Brecht; Wheatley, Angela; Rhule, Emma L.; de Clercq, Patrick; van Leeuwen, Thomas; Thomas, Alison	Intraguild predation by Harmonia axyridis (Coleoptera: Coccinellidae) on native insects in Europe: molecular detection from field samples	ENTOMOLOGICAL SCIENCE		130	10.1111/ens.12092	2015	1343-8786
Pfeiffer, Steven S.; Gorchov, David L.	Effects of the Invasive Shrub Lonicera maackii on Soil Water Content in Eastern Deciduous Forest	AMERICAN MIDLAND NATURALIST		38	10.1674/0003-0031-173.1.38	2015	0003-0031
Kumschick, Sabrina; Gaertner, Mirijam; Vila, Montserrat; Essl, Franz; Jeschke, Jonathan M.; Pysek, Petr; Ricciardi, Anthony; Bacher, Sven; Blackburn, Tim M.; Dick, Jaimie T. A.; Evans, Thomas; Hulme, Philip E.; Kuehn, Ingolf; Mrugala, Agata; Pergl, Jan; Rabitsch, Wolfgang; Richardson, David M.; Sendek, Agnieszka; Winter, Marten	Ecological Impacts of Alien Species: Quantification, Scope, Caveats, and Recommendations	BIOSCIENCE		55	10.1093/biosci/biu193	2015	0006-3568
Tassin, Jacques; Kull, Christian A.	Facing the broader dimensions of biological invasions	LAND USE POLICY		165		2015	0264-8377
Springborn, Michael R.; Keller, Reuben P.; Elwood, Sarah; Romagosa, Christina M.; Zambrana-Torrelio, Carlos; Daszak, Peter	Integrating invasion and disease in the risk assessment of live bird trade	DIVERSITY AND DISTRIBUTIONS		101	10.1111/ddi.12281	2015	1366-9516
Stiels, Darius; Gaisser, Bianca; Schidelko, Kathrin; Engler, Jan O.; Roedder, Dennis	Niche shift in four non-native estrildid finches and implications for species distribution models	IBIS		75	10.1111/ibi.12194	2015	0019-1019
Pool, Thomas K.; Olden, Julian D.	Assessing long-term fish responses and short-term solutions to flow regulation in a dryland river basin	ECOLOGY OF FRESHWATER FISH		56	10.1111/eff.12125	2015	0906-6691
Alba, Christina; Skalova, Hana; McGregor, Kirsty F.; D'Antonio, Carla; Pysek, Petr	Native and exotic plant species respond differently to wildfire and prescribed fire as revealed by meta-analysis	JOURNAL OF VEGETATION SCIENCE		102	10.1111/jvs.12212	2015	1100-9233
te Beest, Mariska; Mpandza, Nokukhanya J.; Olff, Han	Fire and simulated herbivory have antagonistic effects on resistance of savanna grasslands to alien shrub invasion	JOURNAL OF VEGETATION SCIENCE		114	10.1111/jvs.12208	2015	1100-9233
Dar, Pervaiz A.; Reshi, Zafar A.	Do alien plant invasions cause biotic homogenization of terrestrial ecosystems in the Kashmir Valley, India?	TROPICAL ECOLOGY		111		2015	0564-3295
Algar, Dave; Hamilton, Neil; Pink, Caitlyn	Progress in eradicating cats (Felis catus) on Christmas Island to conserve biodiversity	RAFFLES BULLETIN OF ZOOLOGY		45		2014	0217-2445
Heo, Jun-Haeng; Lee, Heon-Joo; Kim, Il-Hun; Fong, Jonathan J.; Kim, Ja-Kyeong; Jeong, Sumin; Park, Daesik	Can an Invasive Prey Species Induce Morphological and Behavioral Changes in an Endemic Predator? Evidence from a South Korean Snake (Oocatochus rufodorsatus)	ASIAN HERPETOLOGICAL RESEARCH		245	10.3724/SP.J.1245.2014.00245	2014	2095-0357
Soderquist, Par; Norrstrom, Joanna; Elmberg, Johan; Guillemain, Matthieu; Gunnarsson, Gunnar	Wild Mallards Have More Goose-Like Bills Than Their Ancestors: A Case of Anthropogenic Influence?	PLOS ONE			10.1371/journal.pone.0115143	2014	1932-6203
Scholler, Markus; Bandini, Ditte; Bernauer, Torsten; Schubert, Georg; Winterhoff, Wulfard	A short overview of the urban mycota of the nature reserve Alter Flugplatz Karlsruhe	Carolinea		137		2014	0176-3997
Zoltan, Kovacs Attila; Erzsebet, Nadasyne Iharosi	ALLELOPATHY OF TREE OF HEAVEN (AILANTHUS ALTISSIMA), COMMON MILKWEED (ASCLEPIAS SYRIACA) AND GIANT HOGWEED (HERACLEUM MANTEGAZZIANUM) ON MAIZE	Novenyvdelem		537		2014	0133-0829
Smith-McKenna, Emily K.; Malanson, George P.; Resler, Lynn M.; Carstensen, Laurence W.; Prisley, Stephen P.; Tomback, Diana F.	Cascading effects of feedbacks, disease, and climate change on alpine treeline dynamics	ENVIRONMENTAL MODELLING & SOFTWARE		85	10.1016/j.envsoft.2014.08.019	2014	1364-8152
Johnson, Jethro; Evans, Cerys; Brown, Nick; Skeates, Stuart; Watkinson, Sarah; Bass, David	Molecular analysis shows that soil fungi from ancient semi-natural woodland exist in sites converted to non-native conifer plantations	FORESTRY		705	10.1093/forestry/cpu031	2014	0015-752X
Rossell, C. Reed, Jr.; Arico, Scott; Clarke, H. David; Horton, Jonathan L.; Ward, Jennifer Rhode; Patch, Steven C.	Forage Selection of Native and Nonnative Woody Plants by Beaver in a Rare-Shrub Community in the Appalachian Mountains of North Carolina	SOUTHEASTERN NATURALIST		649		2014	1528-7092
Mashiko, Miyuki; Toquenaga, Yukihiko	Grey Heron (Ardea cinerea) Expansion Promotes the Persistence of Mixed-species Heron Colonies	WATERBIRDS		362		2014	1524-4695
Yu, Yang; Jang, Eric B.; Siderhurst, Matthew S.	Differential Field Responses of the Little Fire Ant, Wasmannia auropunctata (Roger), to Alarm Pheromone Enantiomers	JOURNAL OF CHEMICAL ECOLOGY		1277	10.1007/s10886-014-0516-z	2014	0098-0331
Kalnicky, Emily A.; Brunson, Mark W.; Beard, Karen H.	A social-ecological systems approach to non-native species: Habituation and its effect on management of coqui frogs in Hawaii	BIOLOGICAL CONSERVATION		187	10.1016/j.biocon.2014.09.044	2014	0006-3207
Joshi, Srijana; Gruntman, Michal; Bilton, Mark; Seifan, Merav; Tielboerger, Katja	A comprehensive test of evolutionarily increased competitive ability in a highly invasive plant species	ANNALS OF BOTANY		1761	10.1093/aob/mcu199	2014	0305-7364
Shewhart, Lauren; McEwan, Ryan W.; Benbow, M. Eric	Evidence for Facilitation of Culex pipiens (Diptera: Culicidae) Life History Traits by the Nonnative Invasive Shrub Amur Honeysuckle (Lonicera maackii)	ENVIRONMENTAL ENTOMOLOGY		1584	10.1603/EN14183	2014	0046-225X
Burtis, James C.; Fahey, Timothy J.; Yavitt, Joseph B.	Impact of invasive earthworms on Ixodes scapularis and other litter-dwelling arthropods in hardwood forests, central New York state, USA	APPLIED SOIL ECOLOGY		148	10.1016/j.apsoil.2014.07.005	2014	0929-1393
Perkins, Lora B.; Hatfield, Gary	Competition, legacy, and priority and the success of three invasive species	BIOLOGICAL INVASIONS		2543	10.1007/s10530-014-0684-3	2014	1387-3547
Meisner, Annelein; Hol, W. H. Gera; de Boer, Wietse; Krumins, Jennifer Adams; Wardle, David A.; van der Putten, Wim H.	Plant-soil feedbacks of exotic plant species across life forms: a meta-analysis	BIOLOGICAL INVASIONS		2551	10.1007/s10530-014-0685-2	2014	1387-3547
Mullah, Collins Jared Amwatta; Klanderud, Kari; Totland, Orjan; Odee, David	Community invasibility and invasion by non-native Fraxinus pennsylvanica trees in a degraded tropical forest	BIOLOGICAL INVASIONS		2747	10.1007/s10530-014-0701-6	2014	1387-3547
Langor, David W.; Cameron, Erin K.; MacQuarrie, Chris J. K.; McBeath, Alec; McClay, Alec; Peter, Brian; Pybus, Margo; Ramsfield, Tod; Ryall, Krista; Scarr, Taylor; Yemshanov, Denys; DeMerchant, Ian; Foottit, Robert; Pohl, Greg R.	Non-native species in Canada's boreal zone: diversity, impacts, and risk	ENVIRONMENTAL REVIEWS		372	10.1139/er-2013-0083	2014	1208-6053
[truncated: 6,223 more rows]
