# Supplementary material for: Are the ecological effects of the “worst” marine invasive species linked with scientific and media attention?
Source: PLoS One. 2019 Apr 18;14(4):e0215691. doi: 10.1371/journal.pone.0215691 (PMC6472817; doi:10.1371/journal.pone.0215691)
Supplement: S4 Table — (CSV) [file pone.0215691.s004.csv]

focal_non_native_species	ecological_effect	Authors	Year	Title	Source.name	DOI	Times_cited	ref_age	ref_age_10max	cit_per_year
Pterois volitans	2	Albins, Mark A.	2013	Effects of invasive Pacific red lionfish Pterois volitans versus a native predator on Bahamian coral-reef fish communities	BIOLOGICAL INVASIONS	10.1007/s10530-012-0266-1	36	4	4	9
Pterois volitans	1	Anton, Andrea; Cure, Katherine; Layman, Craig A.; Puntila, Riikka; Simpson, Michael S.; Bruno, John F.	2016	Prey naivete to invasive lionfish Pterois volitans on Caribbean coral reefs	MARINE ECOLOGY PROGRESS SERIES	10.3354/meps11553	0	1	1	0
Pterois volitans	1	Ingeman, Kurt E.; Webster, Michael S.	2015	Native prey mortality increases but remains density-dependent following lionfish invasion	MARINE ECOLOGY PROGRESS SERIES	10.3354/meps11332	0	2	2	0
Pterois volitans	1	Black, Andrew N.; Weimann, Sonia R.; Imhoff, Vance E.; Richter, Martin L.; Itzkowitz, Murray	2014	A differential prey response to invasive lionfish, Pterois volitans: Prey naivete and risk-sensitive courtship	JOURNAL OF EXPERIMENTAL MARINE BIOLOGY AND ECOLOGY	10.1016/j.jembe.2014.06.002	2	3	3	0.666666666666667
Pterois volitans	0	Elise, Simon; Urbina-Barreto, Isabel; Boadas-Gil, Hazael; Galindo-Vivas, Miguel; Kulbicki, Michel	2015	No detectable effect of lionfish (Pterois volitans and P-miles) invasion on a healthy reef fish assemblage in Archipelago Los Roques National Park, Venezuela	MARINE BIOLOGY	10.1007/s00227-014-2571-y	1	2	2	0.5
Pterois volitans	3	Lesser, Michael P.; Slattery, Marc	2011	Phase shift to algal dominated communities at mesophotic depths associated with lionfish (Pterois volitans) invasion on a Bahamian coral reef	BIOLOGICAL INVASIONS	10.1007/s10530-011-0005-z	50	6	6	8.33333333333333
Pterois volitans	2	Green, Stephanie J.; Dulvy, Nicholas K.; Brooks, Annabelle M. L.; Akins, John L.; Cooper, Andrew B.; Miller, Skylar; Cote, Isabelle M.	2014	Linking removal targets to the ecological effects of invaders: a predictive model and field test	ECOLOGICAL APPLICATIONS		13	3	3	4.33333333333333
Pterois volitans	2	Albins, Mark A.	2015	Invasive Pacific lionfish Pterois volitans reduce abundance and species richness of native Bahamian coral-reef fishes	MARINE ECOLOGY PROGRESS SERIES	10.3354/meps11159	4	2	2	2
Pterois volitans	2	Green, Stephanie J.; Akins, John L.; Cote, Isabelle M.	2011	Foraging behaviour and prey consumption in the Indo-Pacific lionfish on Bahamian coral reefs	MARINE ECOLOGY PROGRESS SERIES	10.3354/meps09208	36	6	6	6
Pterois volitans	2	Benkwitt, Cassandra E.	2015	Non-linear effects of invasive lionfish density on native coral-reef fish communities	BIOLOGICAL INVASIONS	10.1007/s10530-014-0801-3	1	2	2	0.5
Carcinus maenas	1	Whitlow, W. Lindsay	2010	Changes in survivorship, behavior, and morphology in native soft-shell clams induced by invasive green crab predators	MARINE ECOLOGY-AN EVOLUTIONARY PERSPECTIVE	10.1111/j.1439-0485.2009.00350.x	6	7	7	0.857142857142857
Carcinus maenas	1	Whitlow, W. Lindsay; Rice, Neil A.; Sweeney, Christine	2003	Native species vulnerability to introduced predators: Testing an inducible defense and a refuge from predation.	Biological Invasions	10.1023/A:1024059025890	26	14	10	2.6
Carcinus maenas	0	Estelle, Veronica; Grosholz, Edwin D.	2012	Experimental Test of the Effects of a Non-Native Invasive Species on a Wintering Shorebird	CONSERVATION BIOLOGY	10.1111/j.1523-1739.2011.01820.x	0	5	5	0
Carcinus maenas	1	Griffen, Blaine D.; Guy, Travis; Buck, Julia C.	2008	Inhibition between invasives: a newly introduced predator moderates the impacts of a previously established invasive predator	JOURNAL OF ANIMAL ECOLOGY	10.1111/j.1365-2656.2007.01304.x	40	9	9	4.44444444444444
Carcinus maenas	1	Delaney, David G.; Griffen, Blaine D.; Leung, Brian	2011	Does consumer injury modify invasion impact?	BIOLOGICAL INVASIONS	10.1007/s10530-011-9975-0	5	6	6	0.833333333333333
Carcinus maenas	2	Coverdale, Tyler C.; Axelman, Eric E.; Brisson, Caitlin P.; Young, Eric W.; Altieri, Andrew H.; Bertness, Mark D.	2013	New England Salt Marsh Recovery: Opportunistic Colonization of an Invasive Species and Its Non-Consumptive Effects	PLOS ONE	10.1371/journal.pone.0073823	5	4	4	1.25
Carcinus maenas	0	Freeman, Aaren S.; Wright, Jeffrey T.; Hewitt, Chad L.; Campbell, Marnie L.; Szeto, Kaylene	2013	A gastropod's induced behavioral and morphological responses to invasive Carcinus maenas in Australia indicate a lack of novelty advantage	BIOLOGICAL INVASIONS	10.1007/s10530-013-0409-z	2	4	4	0.5
Carcinus maenas	2	Griffen, Blaine D.; Byers, James E.	2009	Community impacts of two invasive crabs: the interactive roles of density, prey recruitment, and indirect effects	BIOLOGICAL INVASIONS	10.1007/s10530-008-9305-3	28	8	8	3.5
Carcinus maenas	1	Large, Scott I.; Smee, Delbert L.	2013	Biogeographic variation in behavioral and morphological responses to predation risk	OECOLOGIA	10.1007/s00442-012-2450-5	1	4	4	0.25
Carcinus maenas	1	Lohrer, AM; Whitlatch, RB	2002	Relative impacts of two exotic brachyuran species on blue mussel populations in Long Island Sound	MARINE ECOLOGY PROGRESS SERIES	10.3354/meps227135	50	15	10	5
Carcinus maenas	2	Gregory, Garry J.; Quijon, Pedro A.	2011	The impact of a coastal invasive predator on infaunal communities: Assessing the roles of density and a native counterpart	JOURNAL OF SEA RESEARCH	10.1016/j.seares.2011.05.009	3	6	6	0.5
Carcinus maenas	1	Malyshev, Andrey; Quijon, Pedro A.	2011	Disruption of essential habitat by a coastal invader: new evidence of the effects of green crabs on eelgrass beds	ICES JOURNAL OF MARINE SCIENCE	10.1093/icesjms/fsr126	5	6	6	0.833333333333333
Caulerpa taxifolia	2	Gribben, Paul E.; Wright, Jeffrey T.	2006	Sublethal effects on reproduction in native fauna: are females more vulnerable to biological invasion?	OECOLOGIA	10.1007/s00442-006-0452-x	20	11	10	2
Caulerpa taxifolia	1	Byers, James E.; Wright, Jeffrey T.; Gribben, Paul E.	2010	Variable direct and indirect effects of a habitat-modifying invasive species on mortality of native fauna	ECOLOGY	10.1890/09-0712.1	34	7	7	4.85714285714286
Caulerpa taxifolia	2	Gallucci, Fabiane; Hutchings, Pat; Gribben, Paul; Fonseca, Gustavo	2012	Habitat alteration and community-level effects of an invasive ecosystem engineer: a case study along the coast of NSW, Australia	MARINE ECOLOGY PROGRESS SERIES	10.3354/meps09547	4	5	5	0.8
Caulerpa taxifolia	1	Gribben, Paul E.; Wright, Jeffrey T.; O'Connor, Wayne A.; Doblin, Martina A.; Eyre, Bradley; Steinberg, Peter D.	2009	Reduced performance of native infauna following recruitment to a habitat-forming invasive marine alga	OECOLOGIA	10.1007/s00442-008-1181-0	32	8	8	4
Caulerpa taxifolia	1	Wright, Jeffrey I.; Gribben, Paul E.	2008	Predicting the impact of an invasive seaweed on the fitness of native fauna	JOURNAL OF APPLIED ECOLOGY	10.1111/j.1365-2664.2008.01541.x	28	9	9	3.11111111111111
Caulerpa taxifolia	0	Ejdung, Gunilla; Flach, Elsina; Byren, Lars; Hummel, Herman	2009	Predation by crustaceans on native and non-native Baltic clams	AQUATIC BIOLOGY	10.3354/ab00155	3	8	8	0.375
Caulerpa taxifolia	0	Peirano, A; Damasso, V; Montefalcone, M; Morri, C; Bianchi, CN	2005	Effects of climate, invasive species and anthropogenic impacts on the growth of the seagrass Posidonia oceanica (L.) Delile in Liguria (NW Mediterranean Sea)	MARINE POLLUTION BULLETIN	10.1016/j.marpolbul.2005.02.011	38	12	10	3.8
Caulerpa taxifolia	0	Gribben, Paul E.; Byers, James E.; Wright, Jeffrey T.; Glasby, Tim M.	2013	Positive versus negative effects of an invasive ecosystem engineer on different components of a marine ecosystem	OIKOS	10.1111/j.1600-0706.2012.20868.x	20	4	4	5
Caulerpa taxifolia	2	Taylor, Skye L.; Bishop, Melanie J.; Kelaher, Brendan P.; Glasby, Tim M.	2010	Impacts of detritus from the invasive alga Caulerpa taxifolia on a soft sediment community	MARINE ECOLOGY PROGRESS SERIES	10.3354/meps08903	10	7	7	1.42857142857143
Undaria pinnatifida	1	Jimenez, Rocio Suarez; Hepburn, Christopher D.; Hyndes, Glenn A.; McLeod, Rebecca J.; Taylor, Richard B.; Hurd, Catriona L.	2015	Do native subtidal grazers eat the invasive kelp Undaria pinnatifida?	MARINE BIOLOGY	10.1007/s00227-015-2757-y	0	2	2	0
Undaria pinnatifida	2	South, Paul M.; Lilley, Stacie A.; Tait, Leigh W.; Alestra, Tommaso; Hickford, Michael J. H.; Thomsen, Mads S.; Schiel, David R.	2016	Transient effects of an invasive kelp on the community structure and primary productivity of an intertidal assemblage	MARINE AND FRESHWATER RESEARCH	10.1071/MF14211	3	1	1	3
Undaria pinnatifida	0	Forrest, Barrie M.; Taylor, Michael D.	2002	Assessing invasion impact: Survey design considerations and implications for management of an invasive marine plant.	Biological Invasions	10.1023/A:1023613428351	30	15	10	3
Undaria pinnatifida	2	Irigoyen, Alejo J.; Trobbiani, Gaston; Sgarlatta, Maria P.; Raffo, Maria P.	2011	Effects of the alien algae Undaria pinnatifida (Phaeophyceae, Laminariales) on the diversity and abundance of benthic macrofauna in Golfo Nuevo (Patagonia, Argentina): potential implications for local food webs	BIOLOGICAL INVASIONS	10.1007/s10530-010-9910-9	22	6	6	3.66666666666667
Mnemiopsis leidyi	3	Finenko, Galina A.; Kideys, Ahmet E.; Anninsky, Boris E.; Shiganova, Tamara A.; Roohi, Abolghaseem; Tabari, Mojgan R.; Rostami, Hosseinali; Bagheri, Siamak	2006	Invasive ctenophore Mnemiopsis leidyi in the Caspian Sea: feeding, respiration, reproduction and predatory impact on the zooplankton community	MARINE ECOLOGY PROGRESS SERIES	10.3354/meps314171	32	11	10	3.2
Mnemiopsis leidyi	2	Roohi, Abolghasem; Yasin, Zulfigar; Kideys, Ahmet E.; Hwai, Aileen Tan Shau; Khanari, Ali Ganjian; Eker-Develi, Elif	2008	Impact of a new invasive ctenophore (Mnemiopsis leidyi) on the zooplankton community of the Southern Caspian sea	MARINE ECOLOGY-AN EVOLUTIONARY PERSPECTIVE	10.1111/j.1439-0485.2008.00254.x	25	9	9	2.77777777777778
Mnemiopsis leidyi	2	Shiganova, TA; Mirzoyan, ZA; Studenikina, EA; Volovik, SP; Siokou-Frangou, I; Zervoudaki, S; Christou, ED; Skirta, AY; Dumont, HJ	2001	Population development of the invader ctenophore Mnemiopsis leidyi, in the Black Sea and in other seas of the Mediterranean basin	MARINE BIOLOGY		116	16	10	11.6
Mnemiopsis leidyi	0	Shiganova, TA; Mirzoyan, ZA; Studenikina, EA; Volovik, SP; Siokou-Frangou, I; Zervoudaki, S; Christou, ED; Skirta, AY; Dumont, HJ	2001	Population development of the invader ctenophore Mnemiopsis leidyi, in the Black Sea and in other seas of the Mediterranean basin	MARINE BIOLOGY		116	16	10	11.6
Mnemiopsis leidyi	2	Oguz, Temel; Fach, Bettina; Salihoglu, Baris	2008	Invasion dynamics of the alien ctenophore Mnemiopsis leidyi and its impact on anchovy collapse in the Black Sea	JOURNAL OF PLANKTON RESEARCH	10.1093/plankt/fbn094	42	9	9	4.66666666666667
Mnemiopsis leidyi	2	Shiganova, Tamara	2008	Introduced species	Handbook of Environmental Chemistry	10.1007/698_5_066	3	9	9	0.333333333333333
Mnemiopsis leidyi	2	Gordina, AD; Zagorodnyaya, JA; Kideys, AE; Bat, L; Satilmis, HH	2005	Summer ichthyoplankton, food supply of fish larvae and impact of invasive ctenophores on the nutrition of fish larvae in the Black Sea during 2000 and 2001	JOURNAL OF THE MARINE BIOLOGICAL ASSOCIATION OF THE UNITED KINGDOM	10.1017/S002531540501146X	9	12	10	0.9
Mnemiopsis leidyi	2	Shiganova, TA; Mirzoyan, ZA; Studenikina, EA; Volovik, SP; Siokou-Frangou, I; Zervoudaki, S; Christou, ED; Skirta, AY; Dumont, HJ	2001	Population development of the invader ctenophore Mnemiopsis leidyi, in the Black Sea and in other seas of the Mediterranean basin	MARINE BIOLOGY		116	16	10	11.6
Mytilus galloprovincialis	2	Chapman, MG; People, J; Blockley, D	2005	Intertidal assemblages associated with natural corallina turf and invasive mussel beds	BIODIVERSITY AND CONSERVATION	10.1007/s10531-004-0698-8	34	12	10	3.4
Mytilus galloprovincialis	2	Sadchatheeswaran, Saachi; Branch, George M.; Robinson, Tamara B.	2015	Changes in habitat complexity resulting from sequential invasions of a rocky shore: implications for community structure	BIOLOGICAL INVASIONS	10.1007/s10530-014-0837-4	2	2	2	1
Mytilus galloprovincialis	0	Branch, George M.; Odendaal, Francois; Robinson, Tamara B.	2008	Long-term monitoring of the arrival, expansion and effects of the alien mussel Mytilus galloprovincialis relative to wave action	MARINE ECOLOGY PROGRESS SERIES	10.3354/meps07626	13	9	9	1.44444444444444
Mytilus galloprovincialis	0	Sellheim, Kirsten; Stachowicz, John J.; Coates, R. Cameron	2010	Effects of a nonnative habitat-forming species on mobile and sessile epifaunal communities	MARINE ECOLOGY PROGRESS SERIES	10.3354/meps08341	19	7	7	2.71428571428571
Mytilus galloprovincialis	1	Branch, GM; Steffani, CN	2004	Can we predict the effects of alien species? A case-history of the invasion of South Africa by Mytilus galloprovincialis (Lamarck)	JOURNAL OF EXPERIMENTAL MARINE BIOLOGY AND ECOLOGY	10.1016/j.jembe.2003.12.007	136	13	10	13.6
Mytilus galloprovincialis	2	de Greef, K.; Griffiths, C. L.; Zeeman, Z.	2013	Deja vu? A second mytilid mussel, Semimytilus algosus, invades South Africa's west coast	AFRICAN JOURNAL OF MARINE SCIENCE	10.2989/1814232X.2013.829789	5	4	4	1.25
Mytilus galloprovincialis	0	Branch, George M.; Odendaal, Francois; Robinson, Tamara B.	2010	Competition and facilitation between the alien mussel Mytilus galloprovincialis and indigenous species: Moderation by wave action	JOURNAL OF EXPERIMENTAL MARINE BIOLOGY AND ECOLOGY	10.1016/j.jembe.2009.10.007	11	7	7	1.57142857142857
Mytilus galloprovincialis	1	Hanekom, Nicholas	2008	Invasion of an indigenous Perna perna mussel bed on the south coast of South Africa by an alien mussel Mytilus galloprovincialis and its effect on the associated fauna	BIOLOGICAL INVASIONS	10.1007/s10530-007-9125-x	16	9	9	1.77777777777778
